# Supplementary material for: AgSbF6-catalyzed C3 aza-Friedel–Crafts alkylation of N,O-acetals with indoles for the synthesis of N-α indole substituted pyrrolidine and piperidine derivatives
Source: Royal Society of Chemistry journal article supplement (doi:10.1039/d2ob02213c), 2023-01-01
Supplement: d2ob02213c1.pdf [file d2ob02213c1.pdf]

## Supporting Information

### AgSbF<sub>6</sub>-Catalyzed C3 *aza*-Friedel-Crafts Alkylation of *N,O* -Acetals with Indoles for Synthesis of *N*- Indole Substituted Pyrrolidine and Piperidine Derivatives

Yu Zhang,<sup>a,b,§</sup> Zi-Juan Yi,<sup>b,§</sup> Ai-Mei Yang,<sup>a,\*</sup> Jia-Ming Guo,<sup>b</sup> Xin Li<sup>b</sup> and Bang-Guo Wei<sup>b,\*</sup>

<sup>a</sup> School of Life Science and Engineering, Lanzhou University of Technology, Lanzhou 730050, China.

<sup>b</sup> Department of Natural Medicine, School of Pharmacy, Fudan University, 826 Zhangheng Road, Shanghai 201203, China.

<sup>§</sup> These authors contributed equally to this work.

### Table of Contents

|                                                                                                                                                        |           |
|--------------------------------------------------------------------------------------------------------------------------------------------------------|-----------|
| I. NMR Spectra of all compounds.....                                                                                                                   | S2-S100   |
| II. HPLC data of <b>8b-8j</b> , <b>8o</b> , <b>8q-8v</b> , <b>10a-10c</b> , <b>10f</b> , <b>12a-12e</b> , <b>12g</b> and <b>12j-12k</b> compounds..... | S101-S128 |
| III. Crystallographic data of <b>8a</b> and <b>12g</b> .....                                                                                           | S129-S164 |

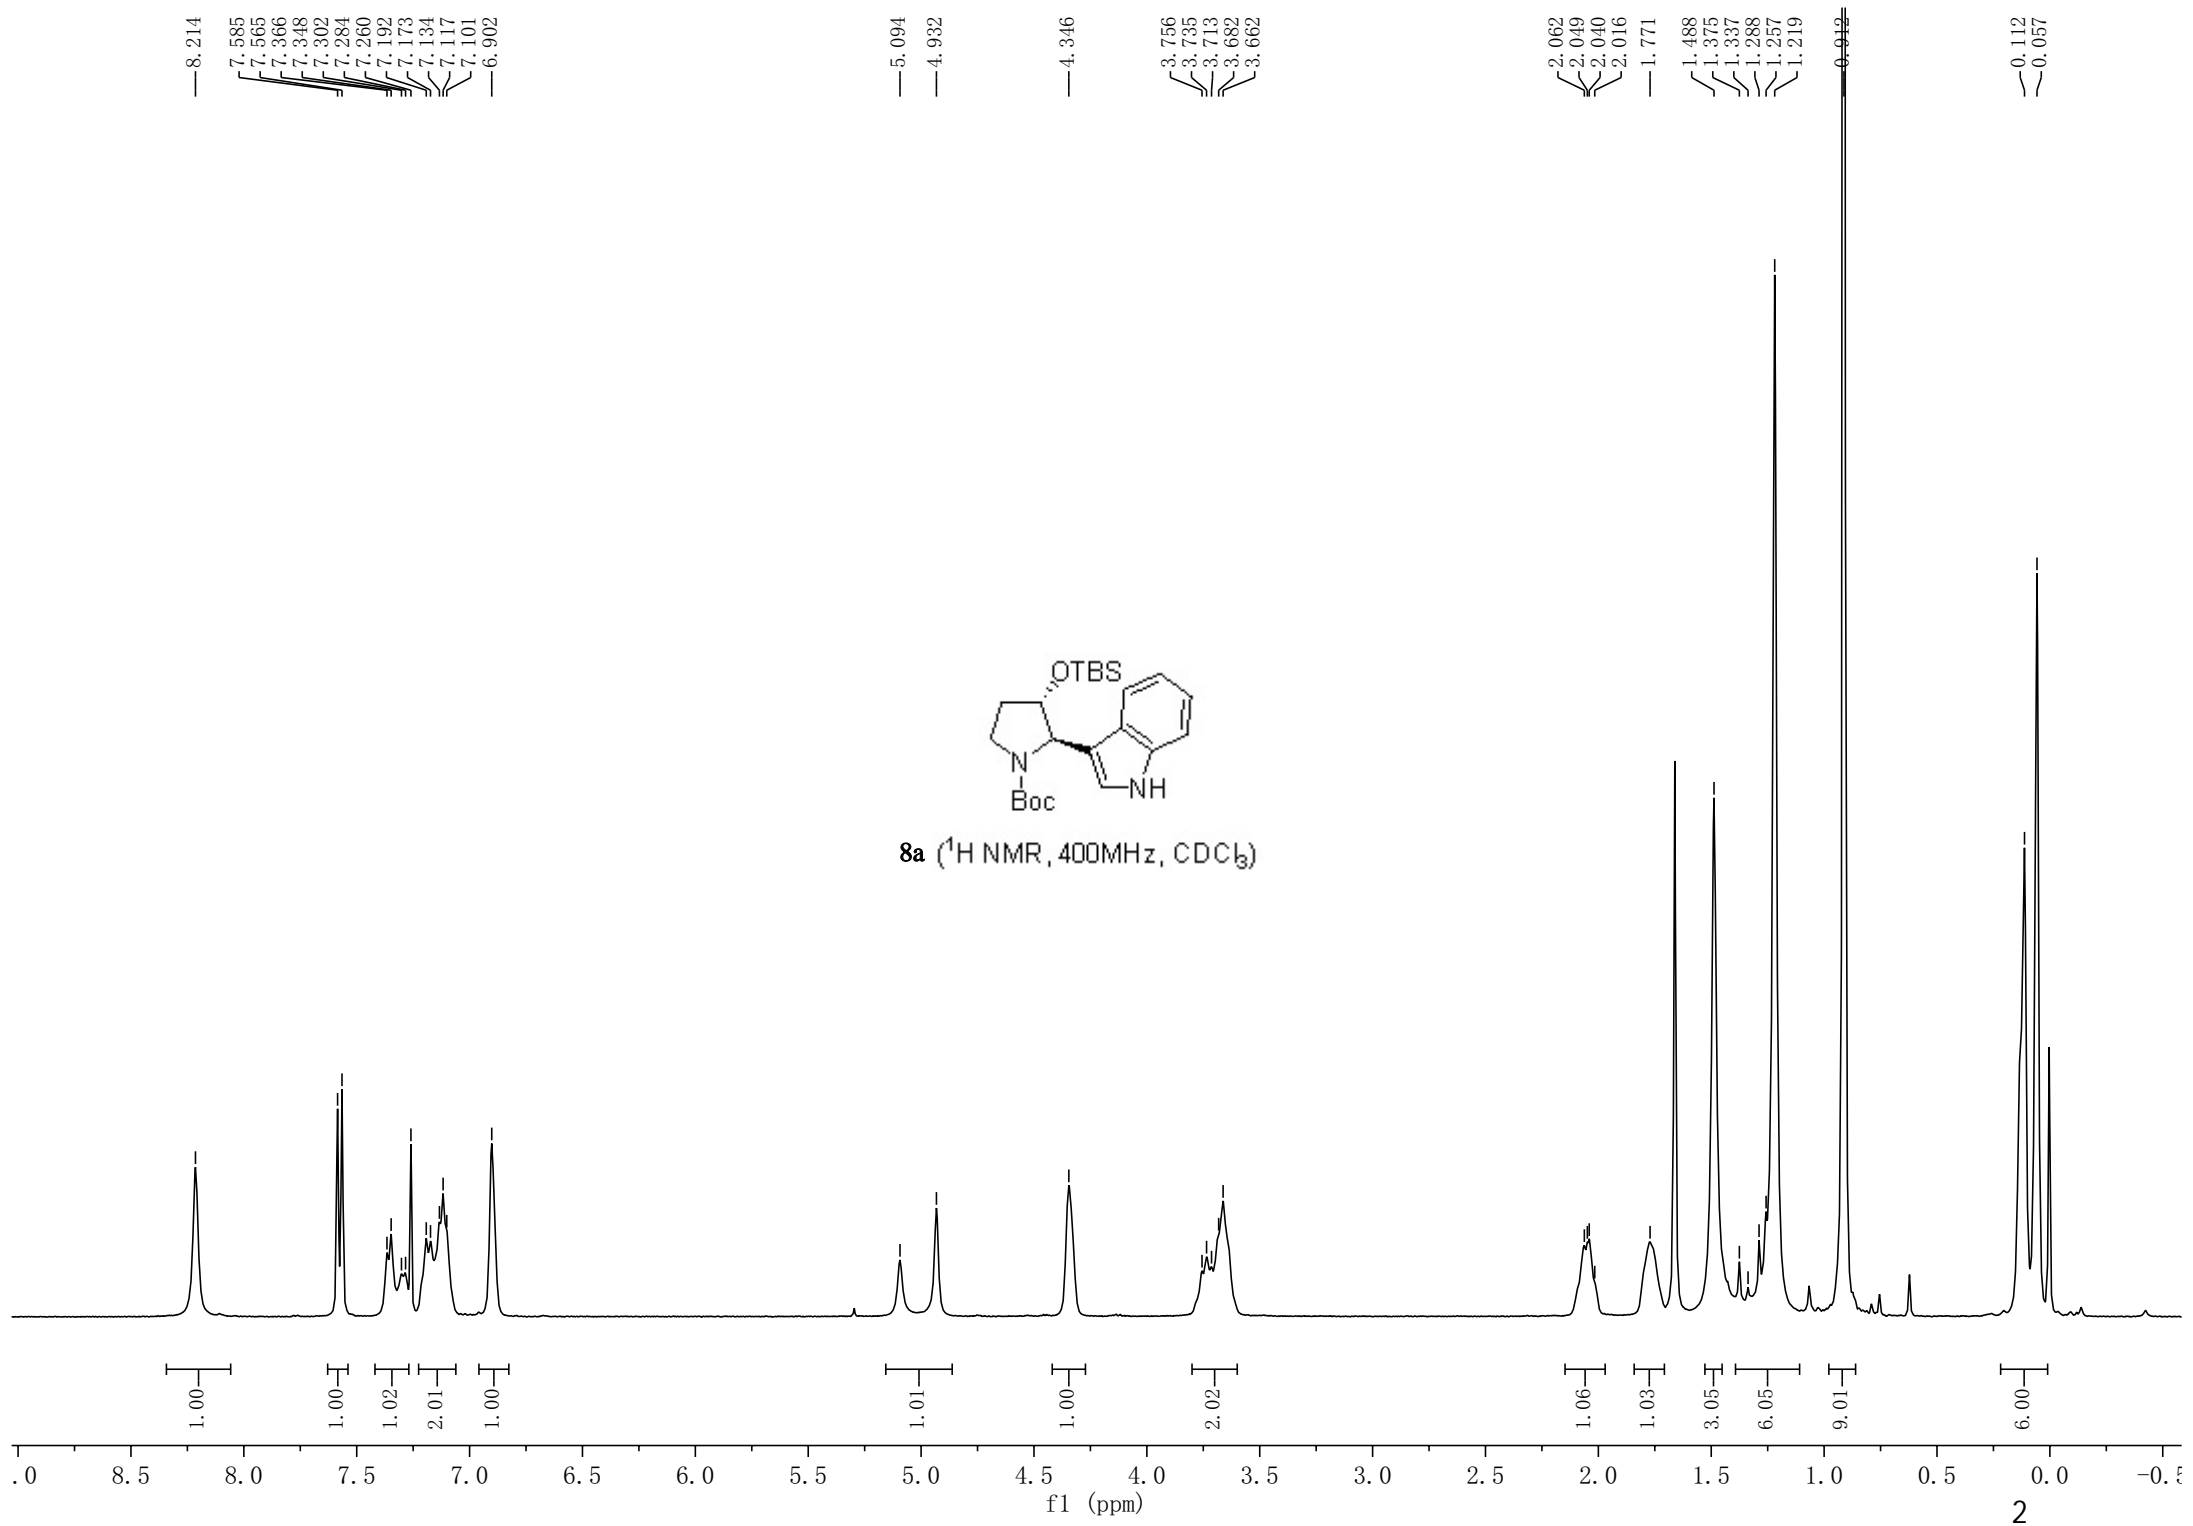

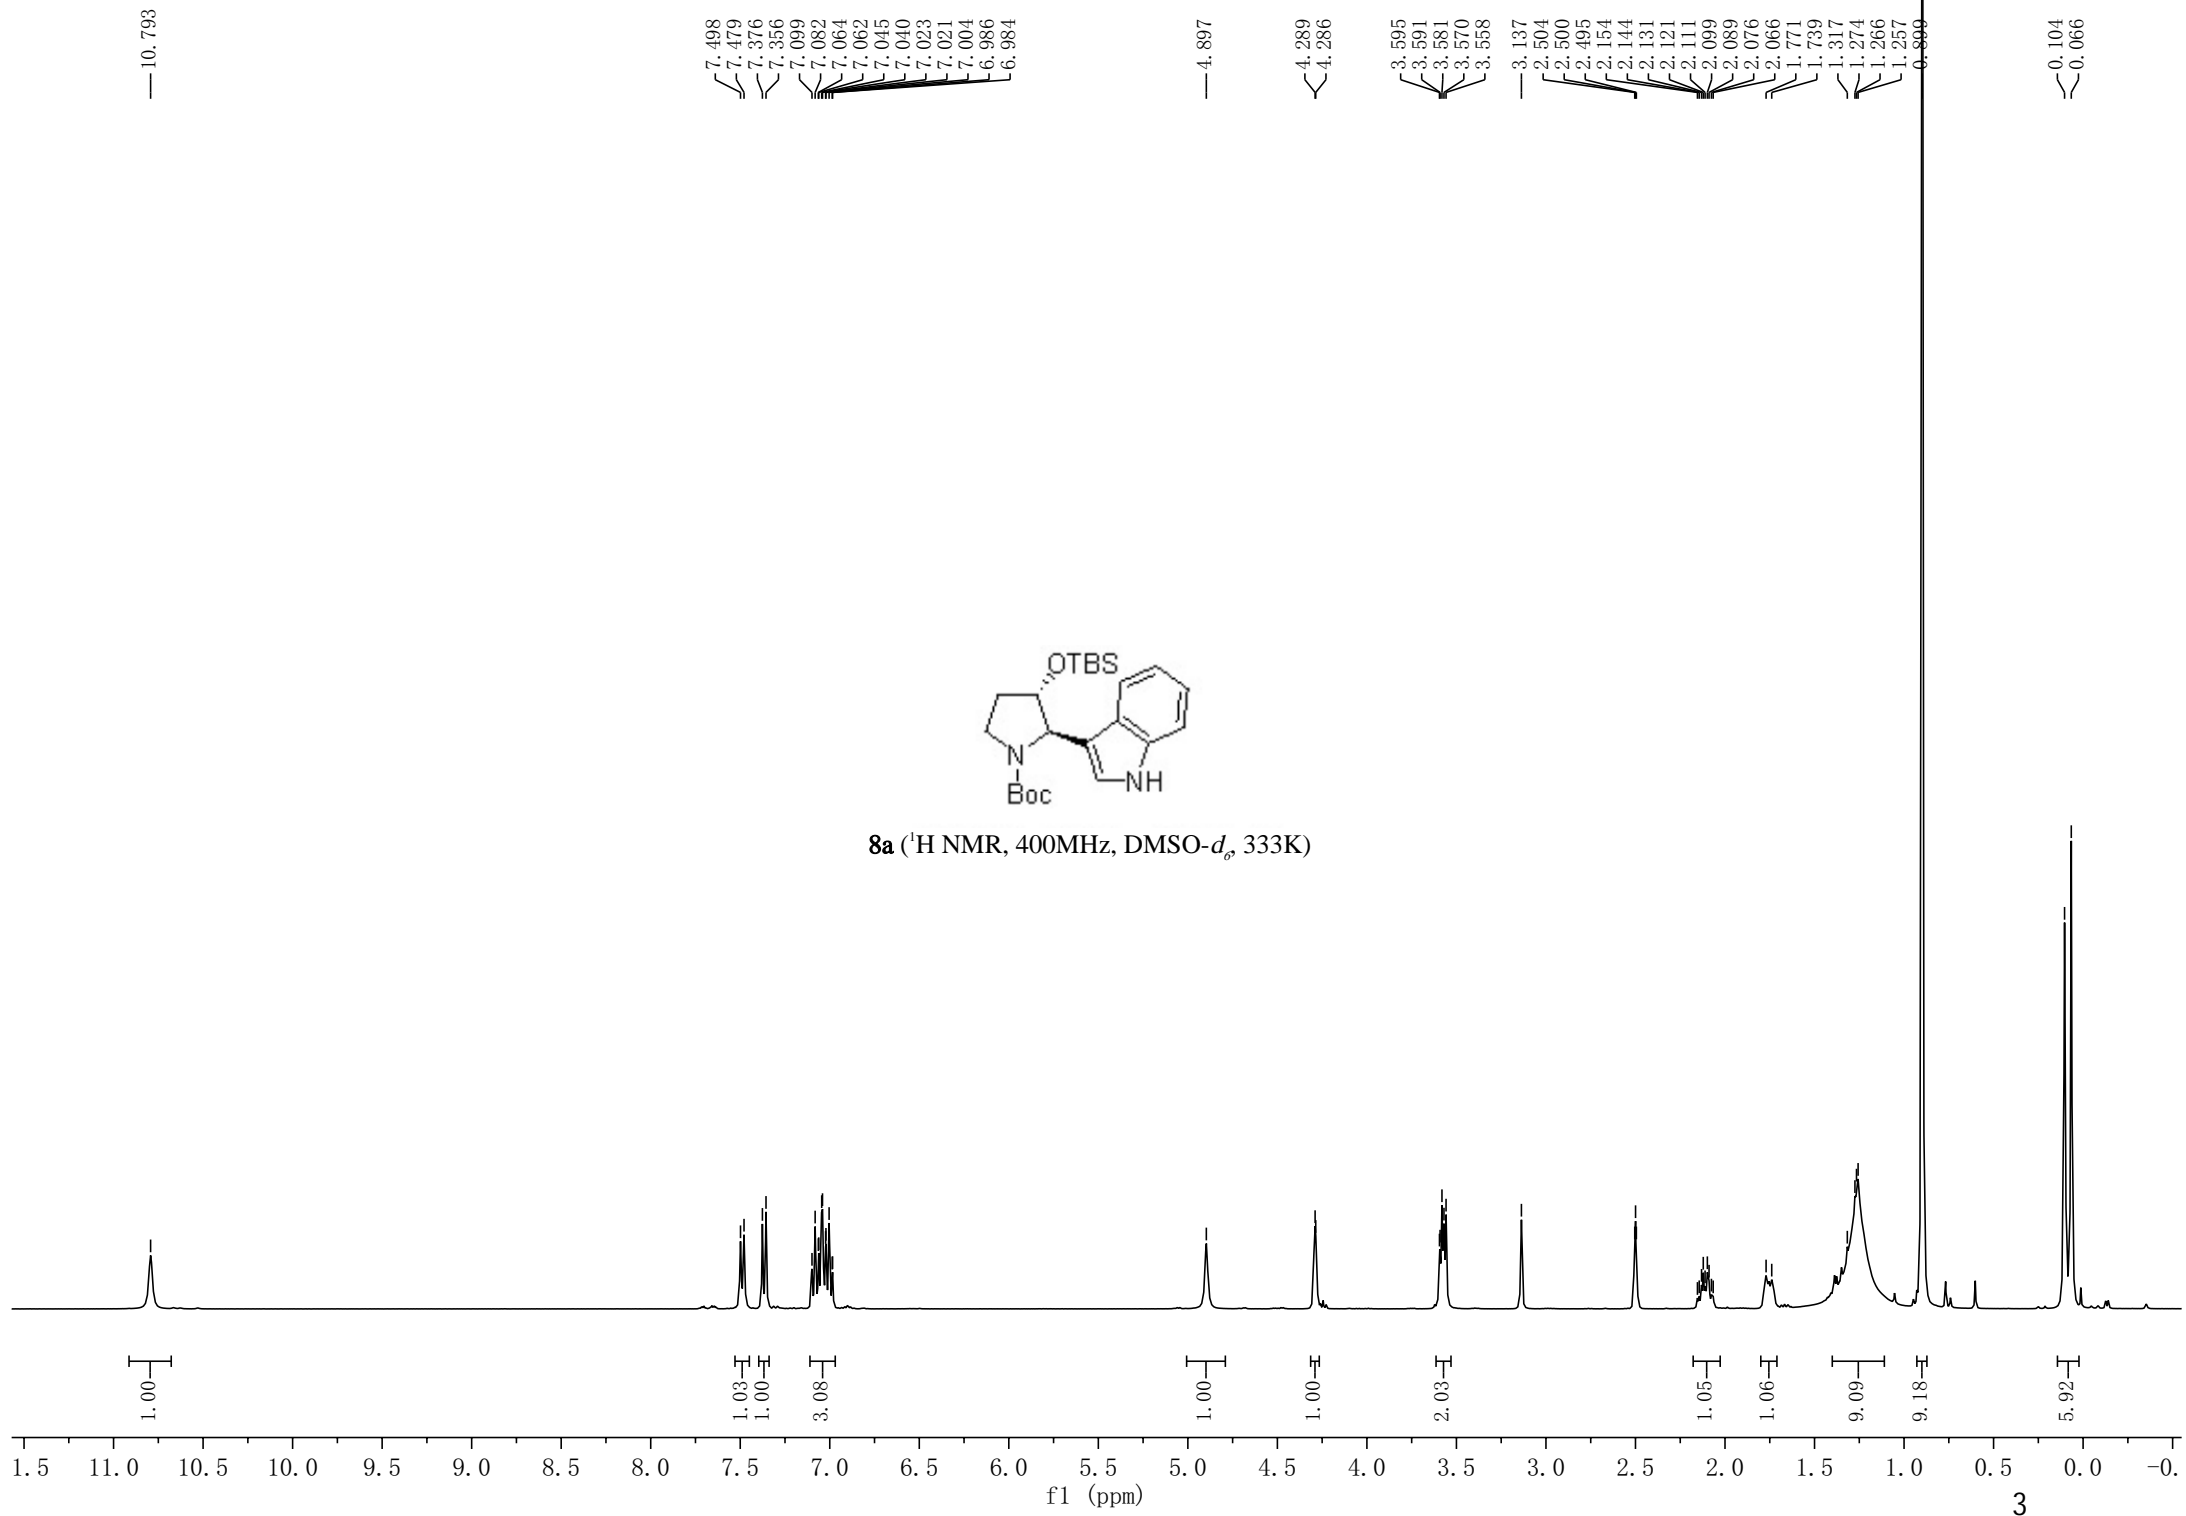

155.574  
155.212

136.994  
136.680

125.685  
122.072  
121.432  
119.564  
118.930  
117.354  
116.555  
111.436

79.216

63.992

44.990  
44.290

32.503  
31.883  
28.715  
28.418  
26.892

18.107

-4.468  
-4.538

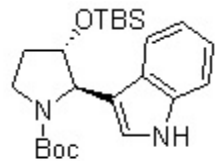

8a (<sup>13</sup>C NMR, 100MHz, CDCl<sub>3</sub>)

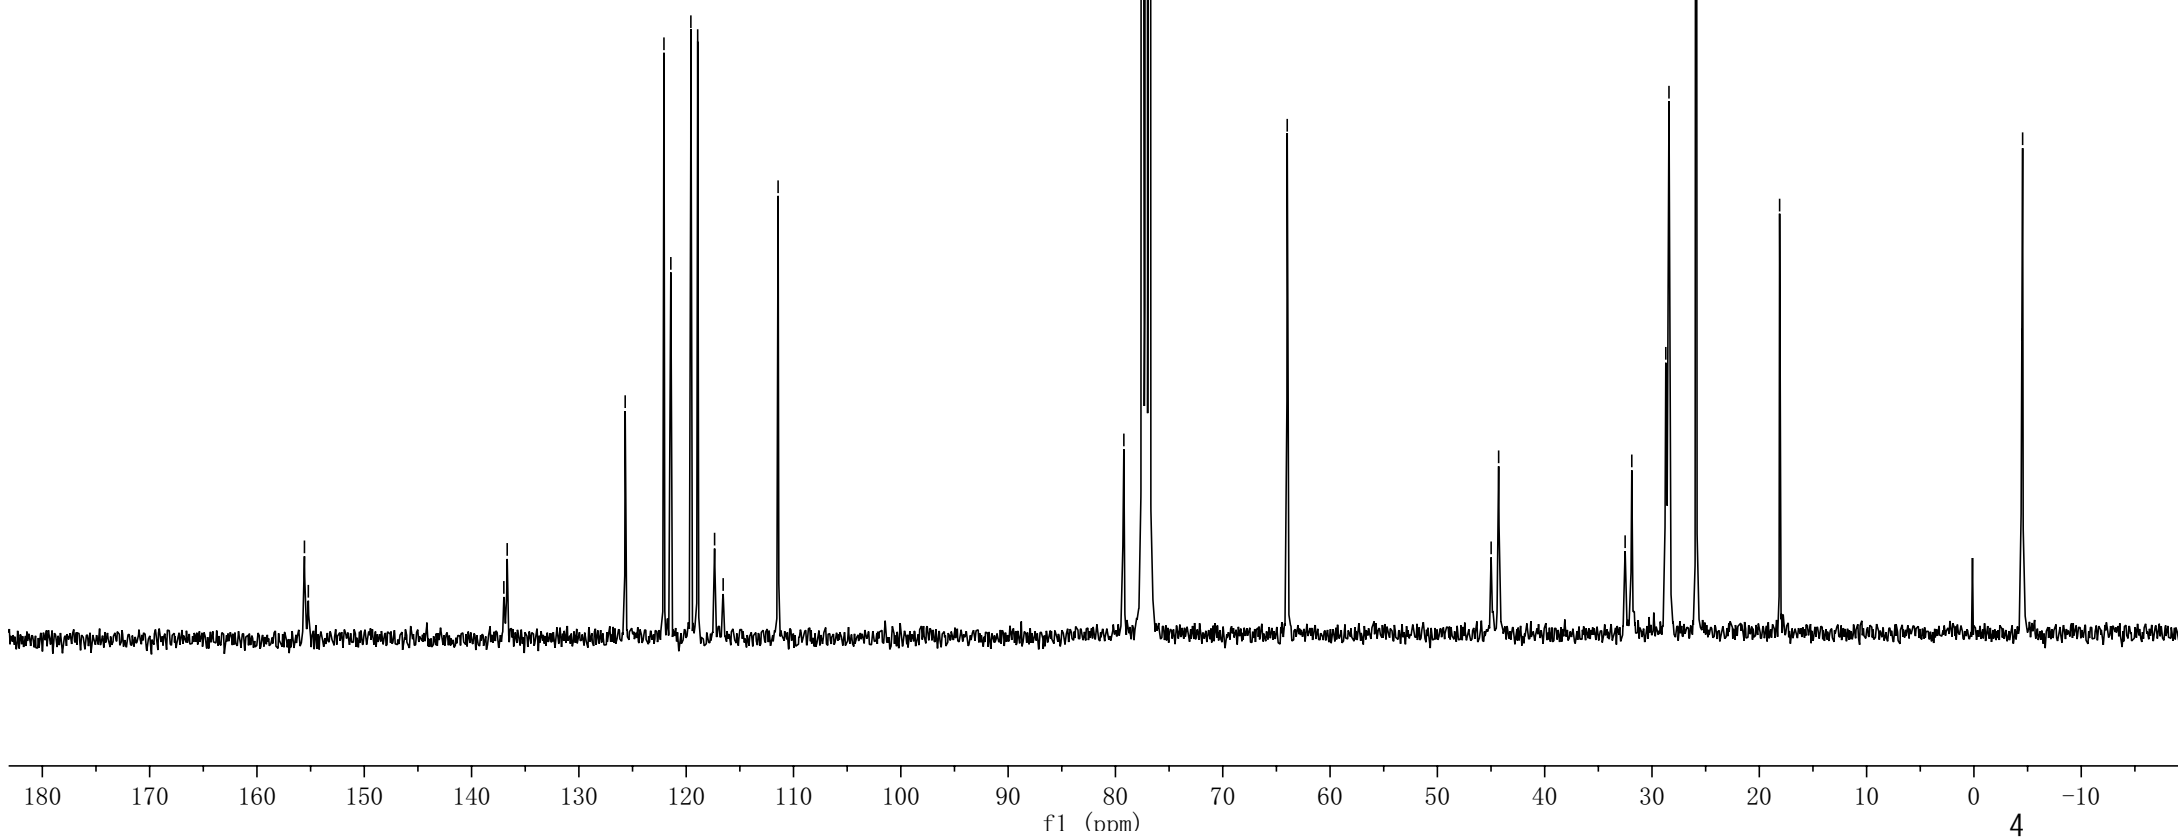

7.576  
7.556  
7.281  
7.247  
7.227  
7.209  
7.108  
7.092  
6.783

5.102  
4.939

4.327

3.727  
3.675  
3.653  
3.632

2.070  
2.047

1.733

1.480

1.285  
1.231

0.912

0.148  
0.124  
0.091  
0.065

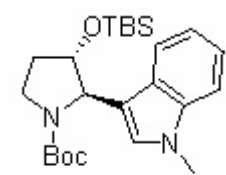

8b (<sup>1</sup>H NMR, 400MHz, CDCl<sub>3</sub>)

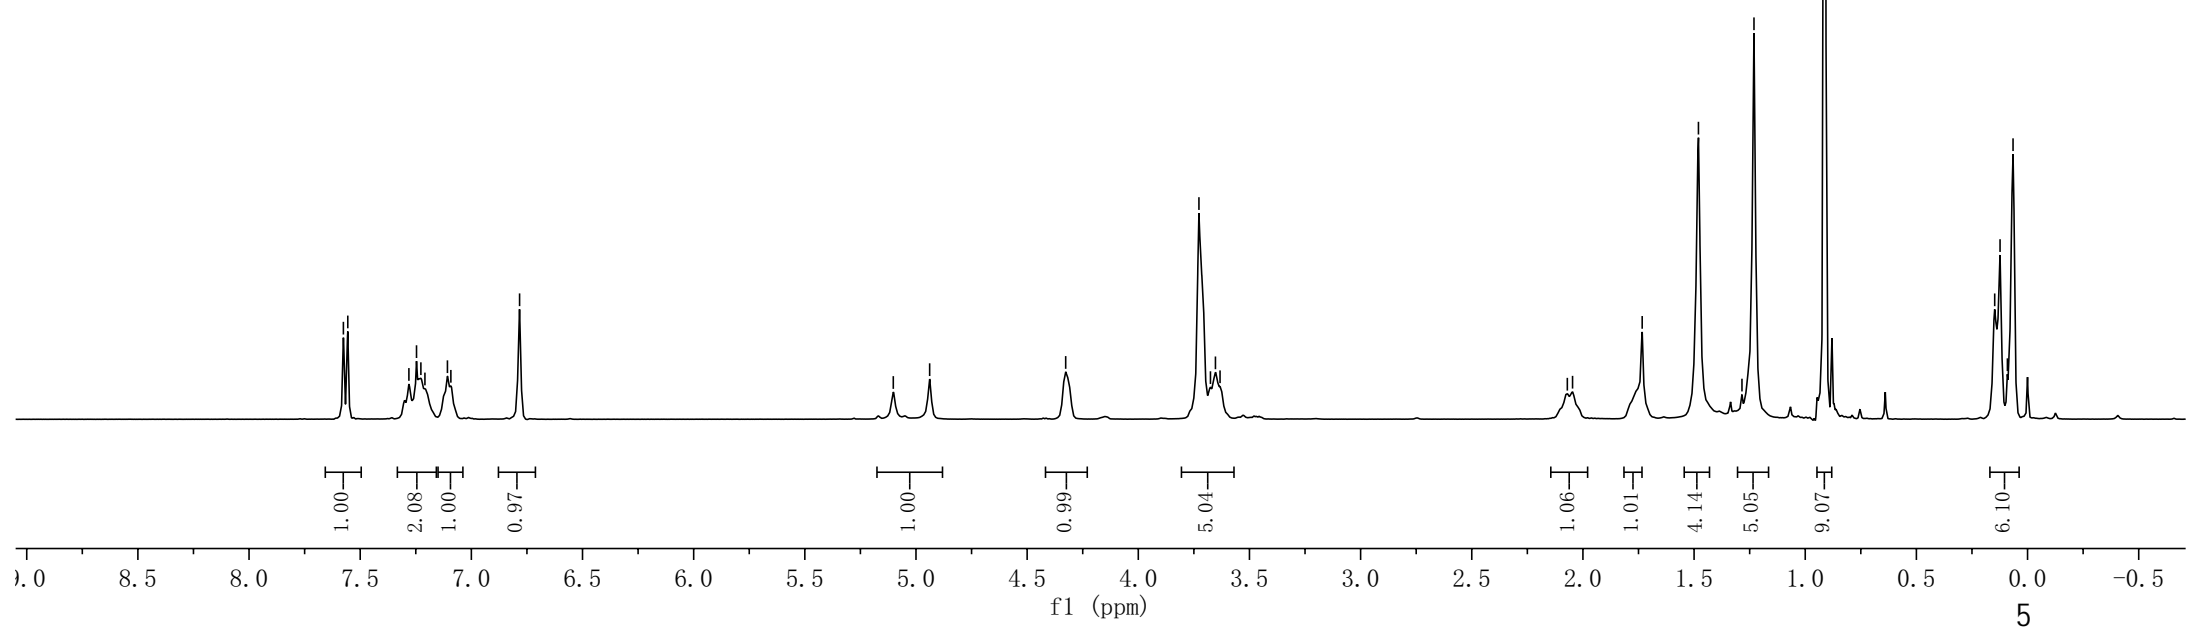

155.535  
155.187

137.651  
137.330

126.096  
125.963

121.645  
119.057  
115.838  
115.125

109.449

79.130

63.946

44.928  
44.226

32.841  
32.413  
31.787  
28.694  
28.548  
28.410  
25.875

18.084

-4.457  
-4.540

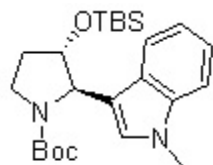

**8b** (<sup>13</sup>C NMR, 100MHz, CDCl<sub>3</sub>)

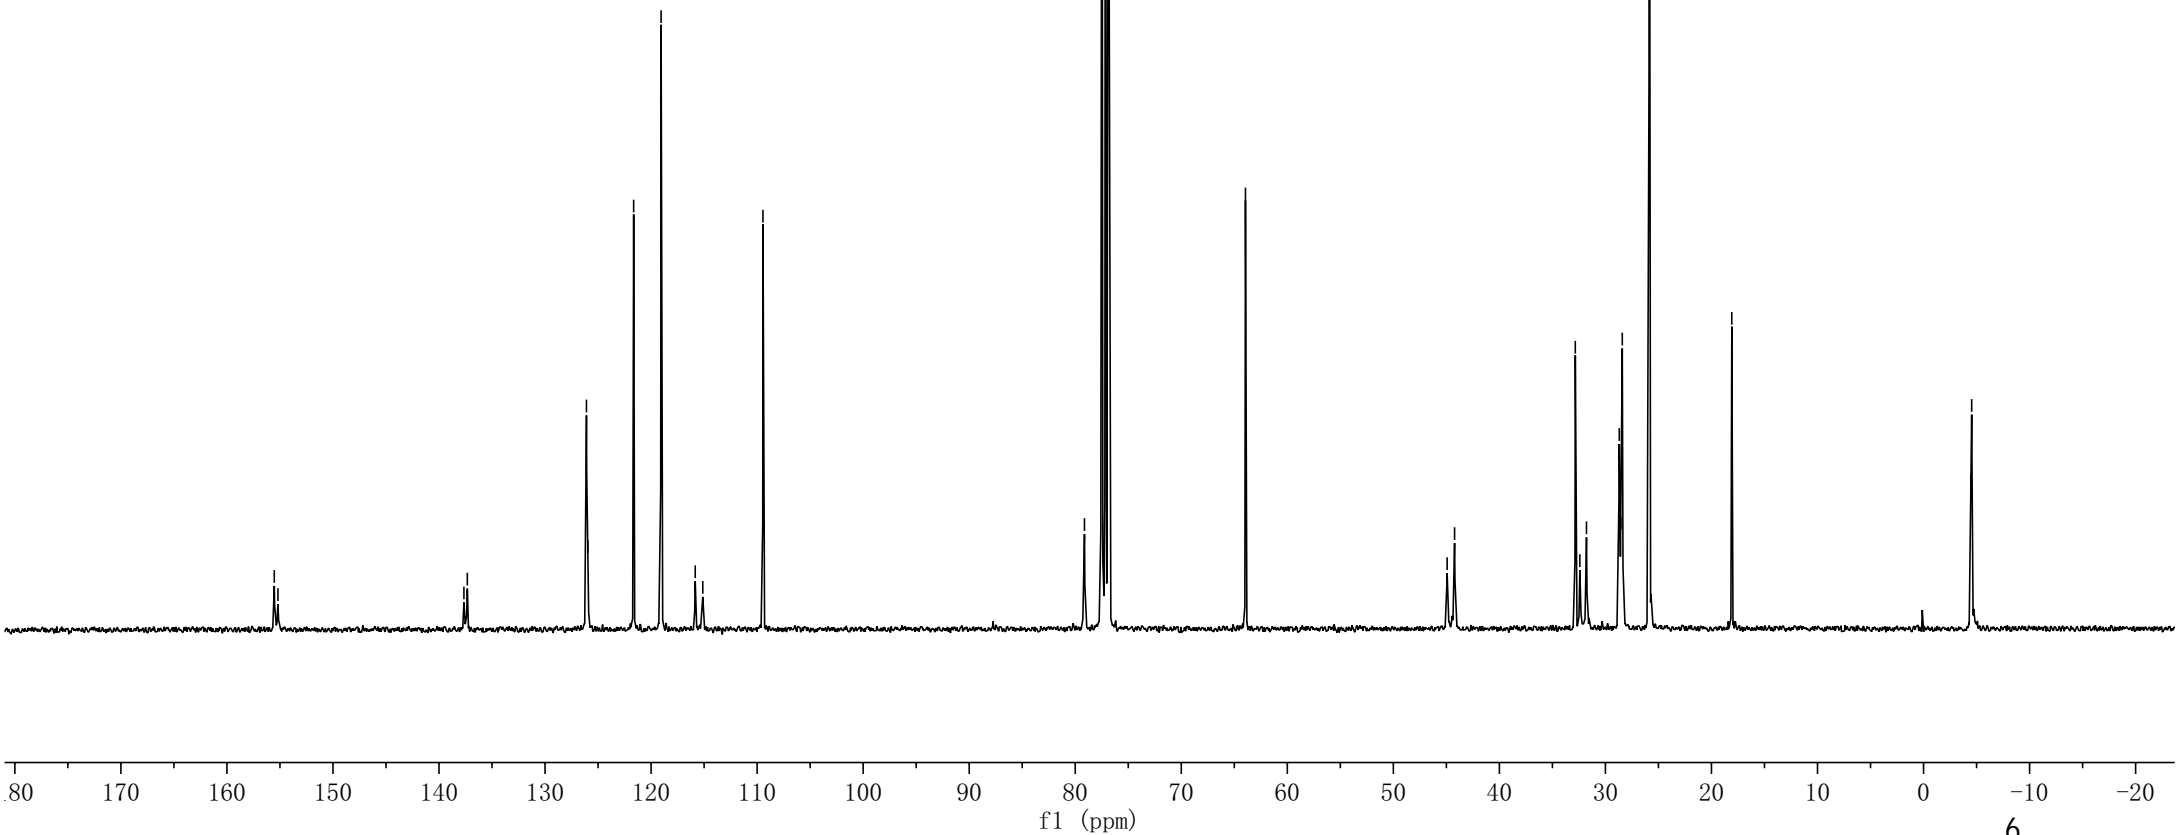

7.687  
7.667  
7.642  
7.606  
7.586  
7.574  
7.548  
7.530  
7.516  
7.393  
7.375  
7.360  
7.288  
7.271  
7.252  
7.234  
7.215  
7.198  
7.168  
7.142  
7.125  
7.106

5.228  
5.151  
5.011

4.563  
4.550  
4.538  
4.525  
4.454

3.803  
3.780  
3.755  
3.738

2.180  
2.166  
2.156  
2.148  
2.134  
2.128  
2.116  
2.105  
2.097  
2.085  
2.077  
2.064  
2.047  
2.034  
1.848  
1.759  
1.731  
1.536  
1.479  
1.473  
1.447  
1.387  
1.348  
1.333  
1.307  
1.281  
1.096

0.970  
0.928  
0.911  
0.880  
0.811  
0.656  
0.220  
0.166  
0.116  
0.048  
-0.072  
-0.360

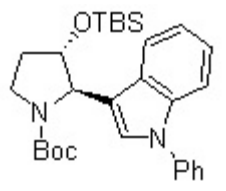

8c (<sup>1</sup>H NMR, 400MHz, CDCl<sub>3</sub>)

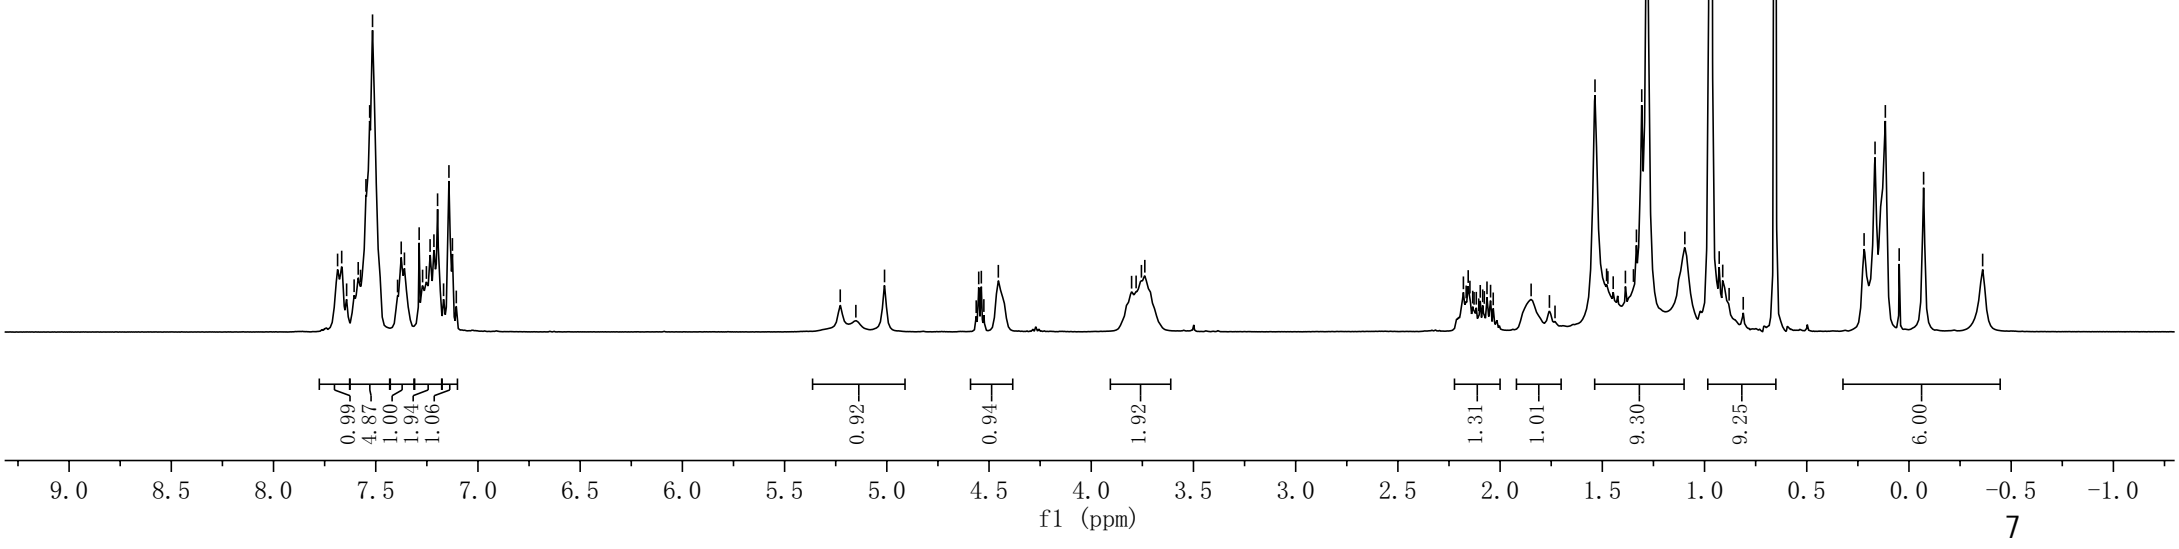

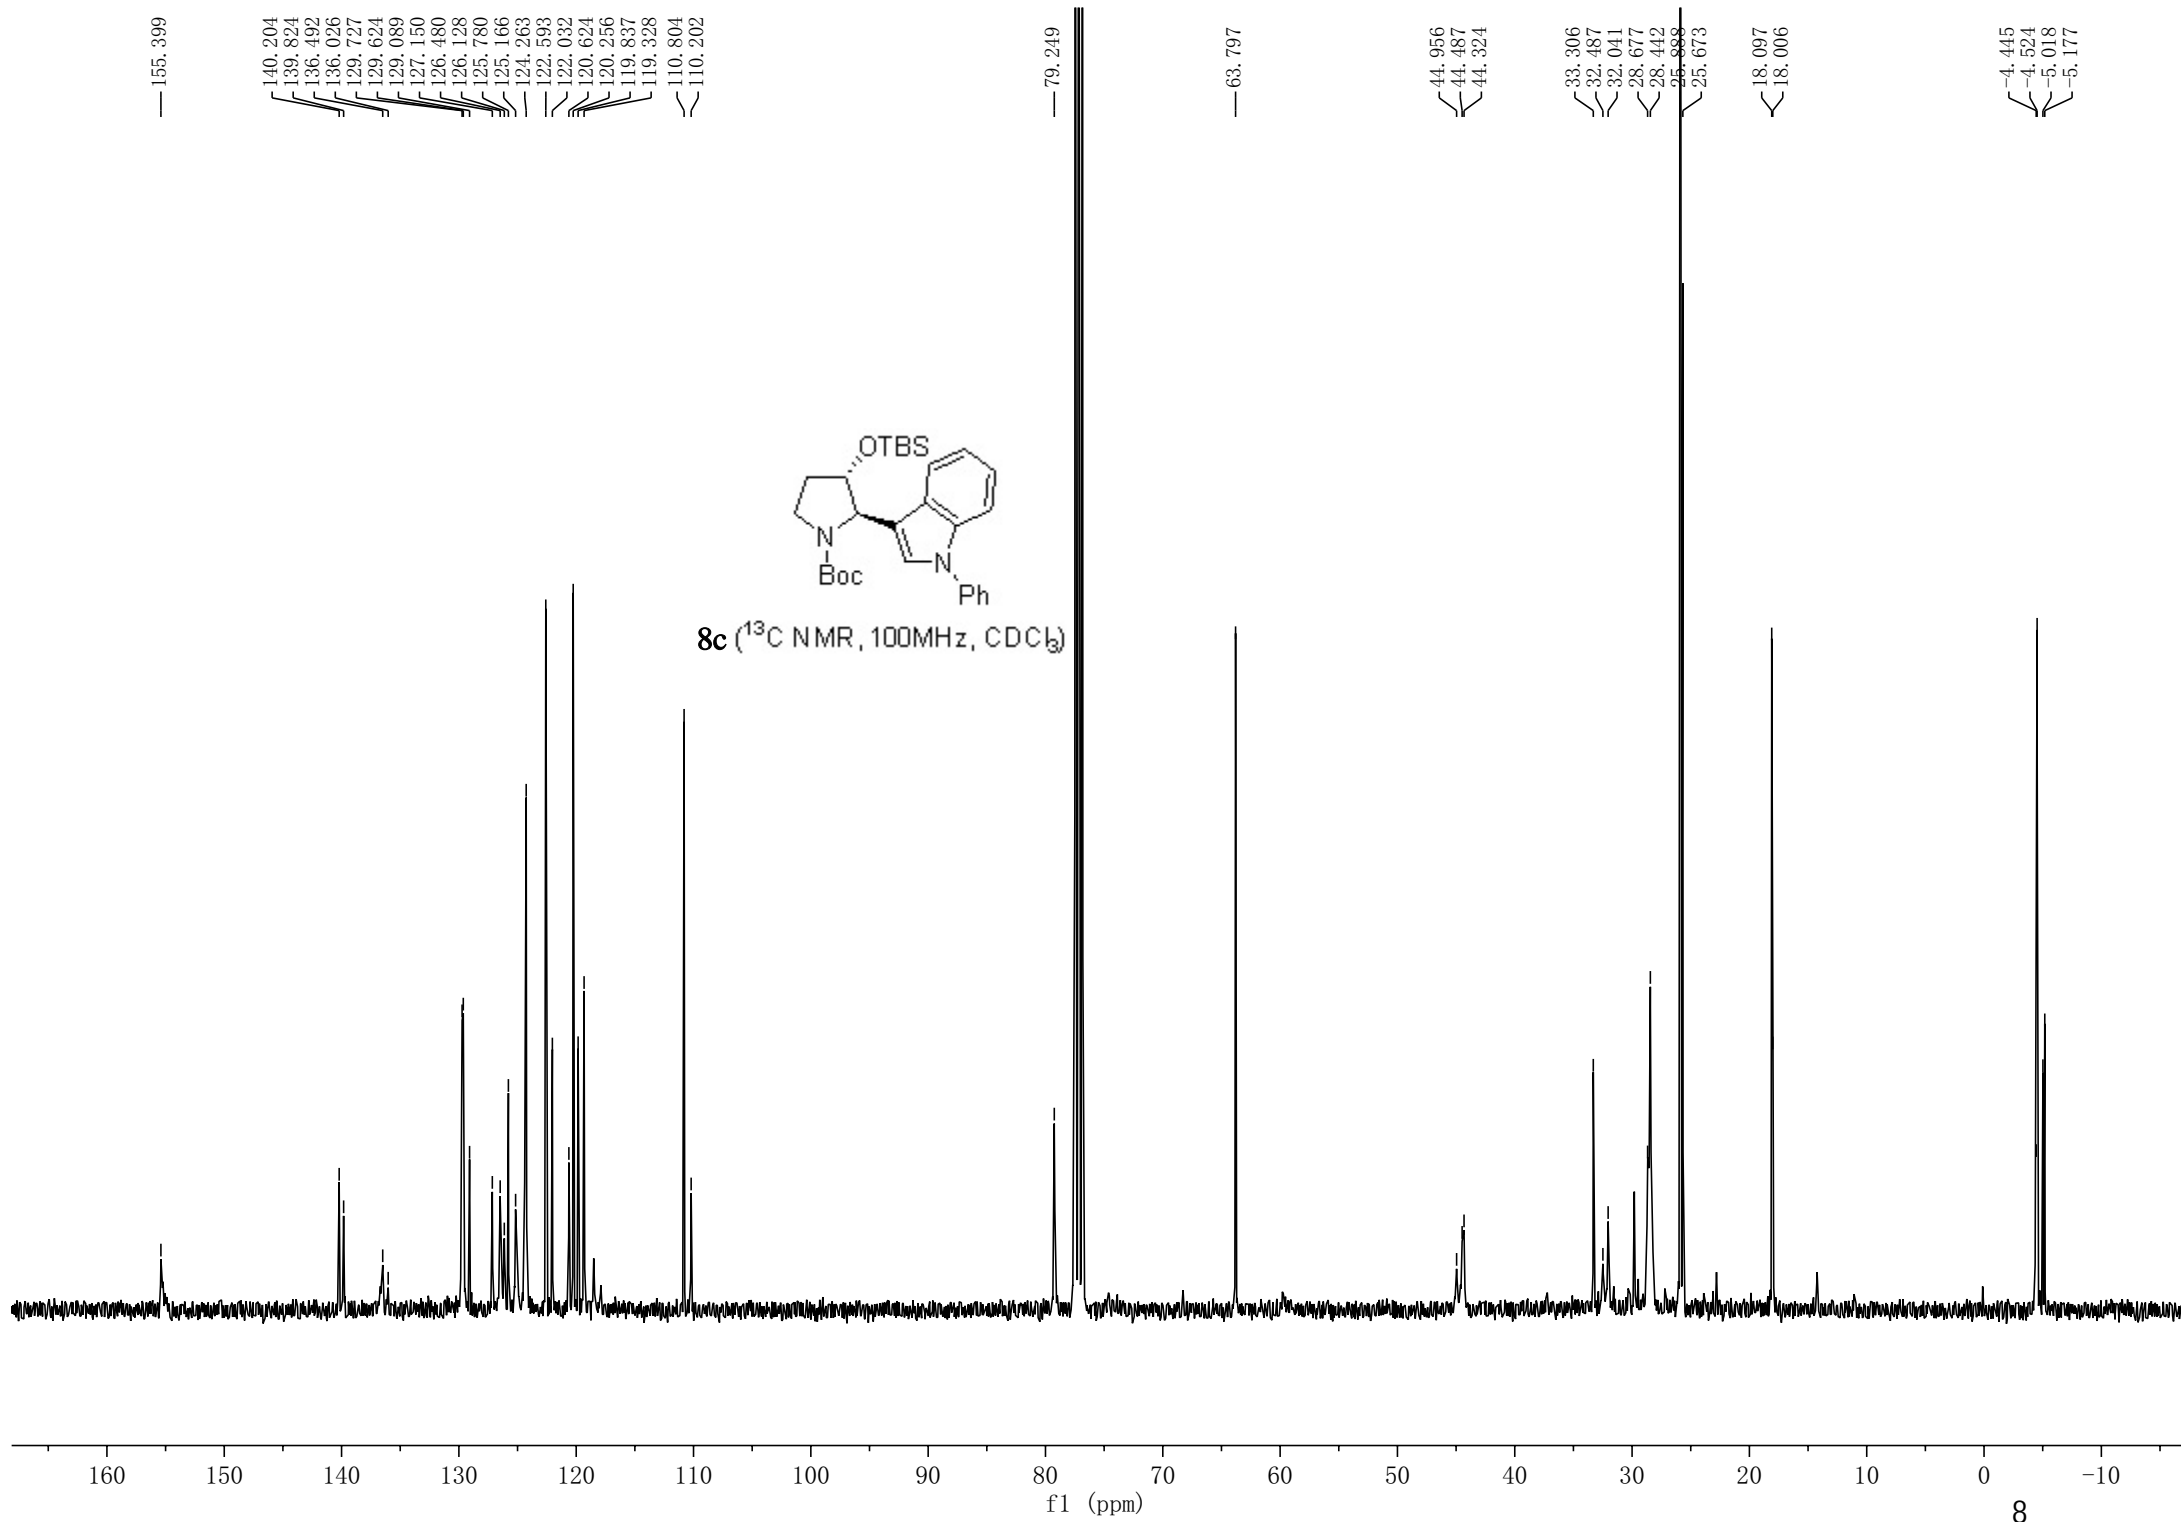



8.474  
8.318

7.526  
7.459  
7.245  
7.139  
7.122  
7.062  
7.025  
6.914  
6.808

4.962  
4.838

4.293  
4.245  
3.753  
3.734  
3.710  
3.690  
3.659  
3.653  
3.632  
3.612  
3.606

2.078  
2.068  
2.055  
2.046  
2.035  
2.023  
2.014  
2.001  
1.991  
1.788

1.496  
1.284  
1.252  
1.221

0.093  
0.047

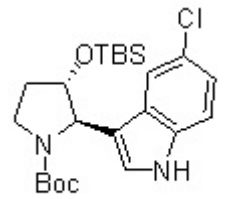

8d (<sup>1</sup>H NMR, 400MHz, CDCl<sub>3</sub>)

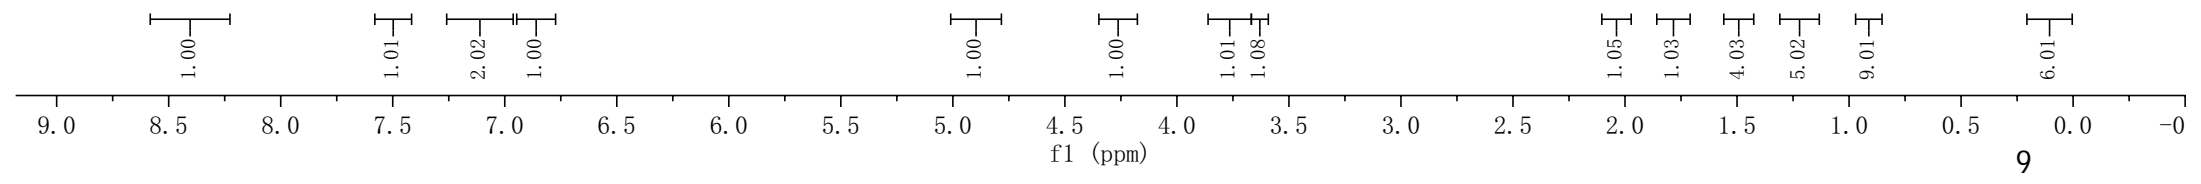

155.440  
155.311

135.239  
134.986

126.755  
126.476

125.279  
122.978

122.738  
122.415

122.227  
118.473

118.287  
117.230

115.917  
112.451

79.582  
79.437

63.887  
63.667

45.131  
44.338

32.634  
32.038

30.275  
28.697

28.428  
25.887

18.118

-4.547

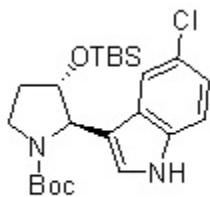

8d (<sup>13</sup>C NMR, 100MHz, CDCl<sub>3</sub>)

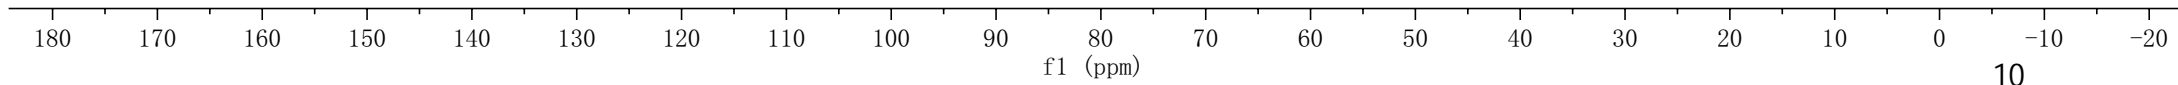



155.444  
155.343

135.455  
135.248  
127.432  
127.096  
124.953  
124.704  
122.804  
122.545  
121.604  
121.314  
117.099  
115.716  
112.913  
112.774

79.628  
79.451

63.920  
63.665

45.160  
44.338

32.630  
32.012  
28.708  
28.437  
25.891

18.122

-4.541

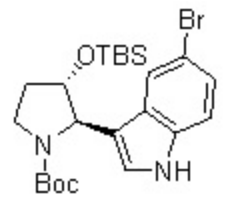

8e (<sup>13</sup>C NMR, 100MHz, CDCl<sub>3</sub>)

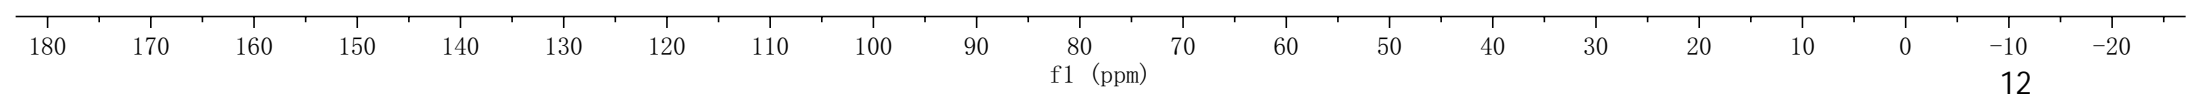

8.144  
8.076  
8.028

7.393  
7.361  
7.274  
7.254  
7.234  
7.214  
7.054  
7.035  
7.016  
6.937  
6.878  
6.744

5.107  
4.953

4.493  
4.479  
4.466  
4.452  
4.391

3.781  
3.762  
3.741  
3.676

2.510  
2.484  
2.431  
2.419

2.072  
2.059  
2.047

1.787

1.524

1.292  
1.280

0.957

0.169  
0.105

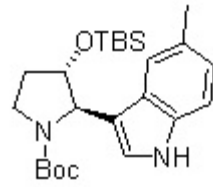

8f (<sup>1</sup>H NMR, 400MHz, CDCl<sub>3</sub>)

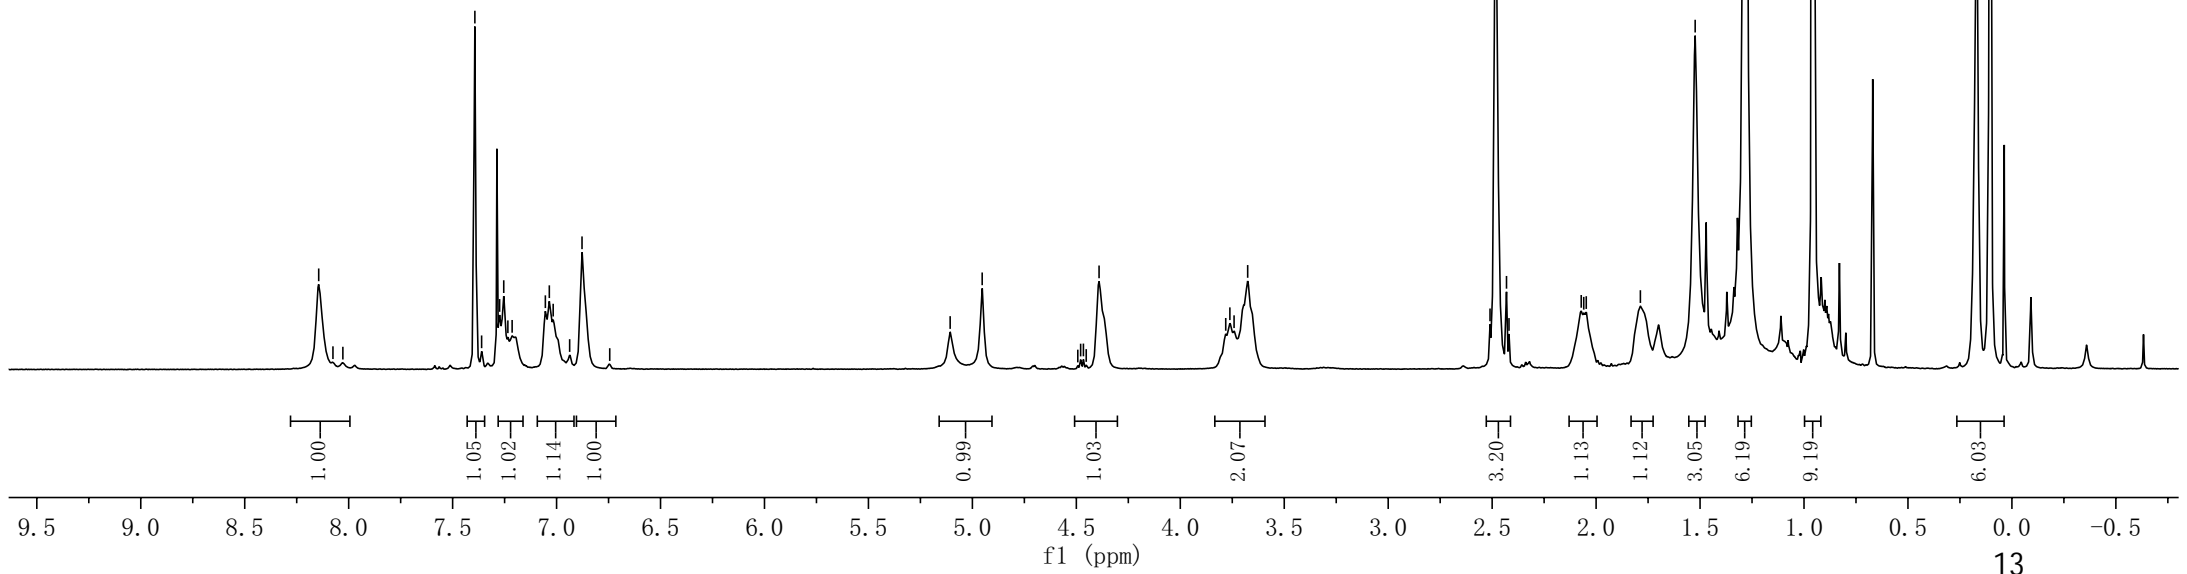

— 155.520

— 134.960

~ 128.516

~ 125.853

~ 123.492

~ 122.960

~ 121.376

~ 118.590

~ 116.618

— 110.956

— 79.079

— 63.949

~ 44.872

~ 44.187

~ 32.373

~ 31.750

~ 29.708

~ 28.599

~ 28.344

~ 25.793

~ 25.583

— 21.552

— 18.006

~ -4.592

~ -4.632

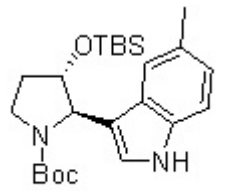

8f (<sup>13</sup>C NMR, 100MHz, CDCl<sub>3</sub>)

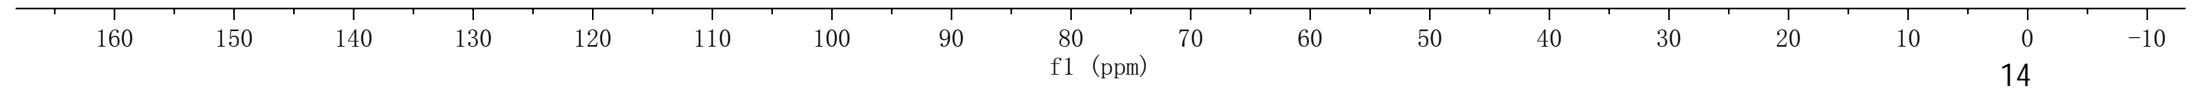

8.350  
8.286

7.482  
7.463  
7.448  
7.427  
7.286  
7.110  
7.092  
7.073  
7.048  
7.032  
7.004  
6.948  
6.927  
6.910  
6.875

5.122  
5.003

4.392  
4.347

3.794  
3.775  
3.752  
3.714  
3.692

2.519  
2.370

2.086  
2.060

1.790

1.537  
1.478

1.289

0.055

0.176  
0.105

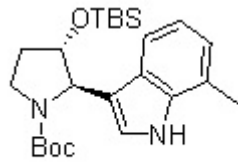

8g (<sup>1</sup>H NMR, 400MHz, CDCl<sub>3</sub>)

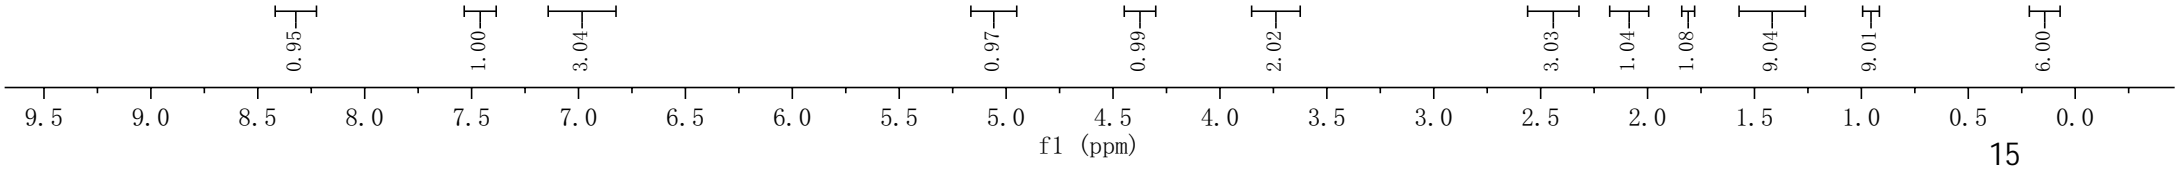

155.703  
155.213

136.467  
136.296  
125.186  
124.987  
122.572  
122.430  
121.287  
121.160  
120.708  
119.725  
117.621  
116.657  
116.553  
116.465  
116.397

79.247

64.159

45.035  
44.291

32.446  
31.729  
28.736  
28.456  
25.887  
25.743

18.091  
16.759  
16.642

-4.441  
-4.515

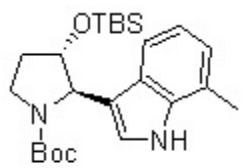

8g (<sup>13</sup>C NMR, 100MHz, CDCl<sub>3</sub>)

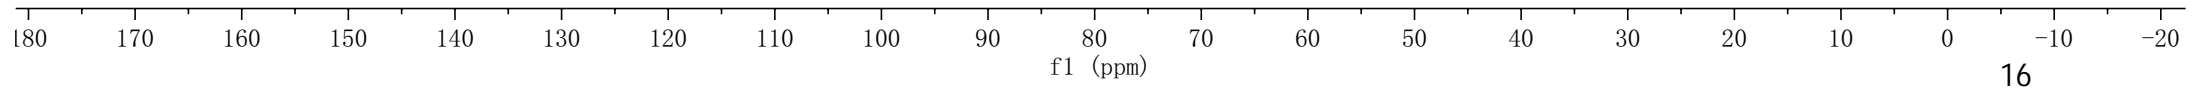







8.236  
8.168

7.480  
7.460  
7.450  
7.295  
7.234  
7.000  
6.954  
6.888  
6.869  
6.849

5.004  
4.824

4.420  
4.407  
4.393  
4.380  
4.250

3.690  
3.611  
2.046  
2.036  
2.022  
2.013  
2.003  
1.999  
1.990  
1.980  
1.967  
1.958  
1.946  
1.939  
1.925  
1.921  
1.907  
1.894  
1.881  
1.877  
1.863  
1.744

1.429  
1.390  
1.383  
1.376  
1.365  
1.210  
1.161  
0.859

0.036  
0.000  
-0.046

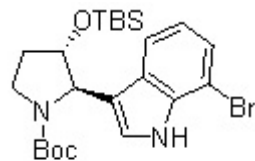

**8i** ( $^1\text{H}$  NMR, 400MHz,  $\text{CDCl}_3$ )

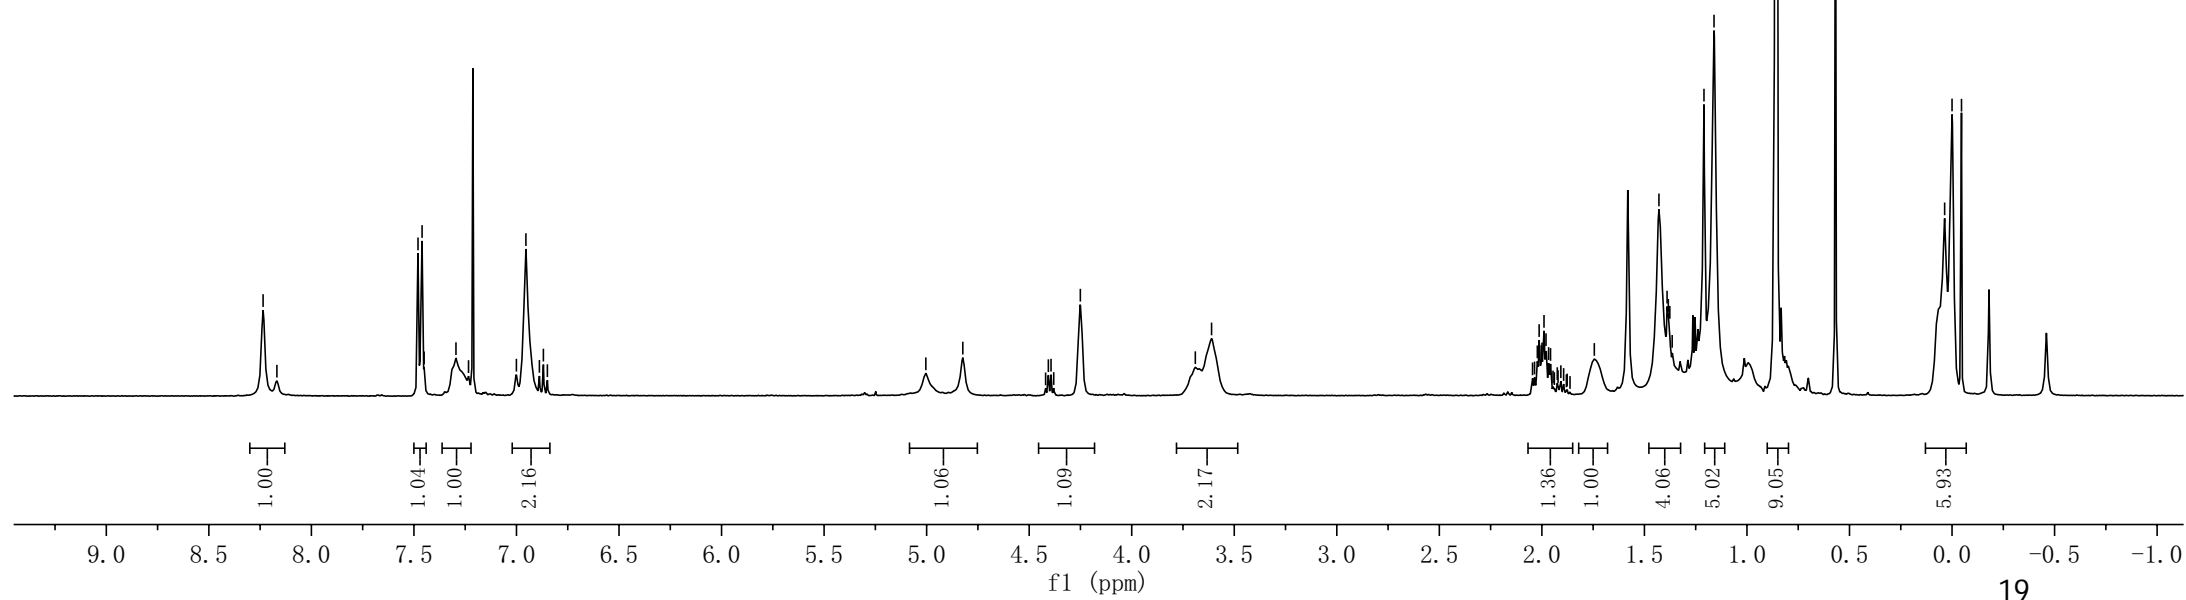



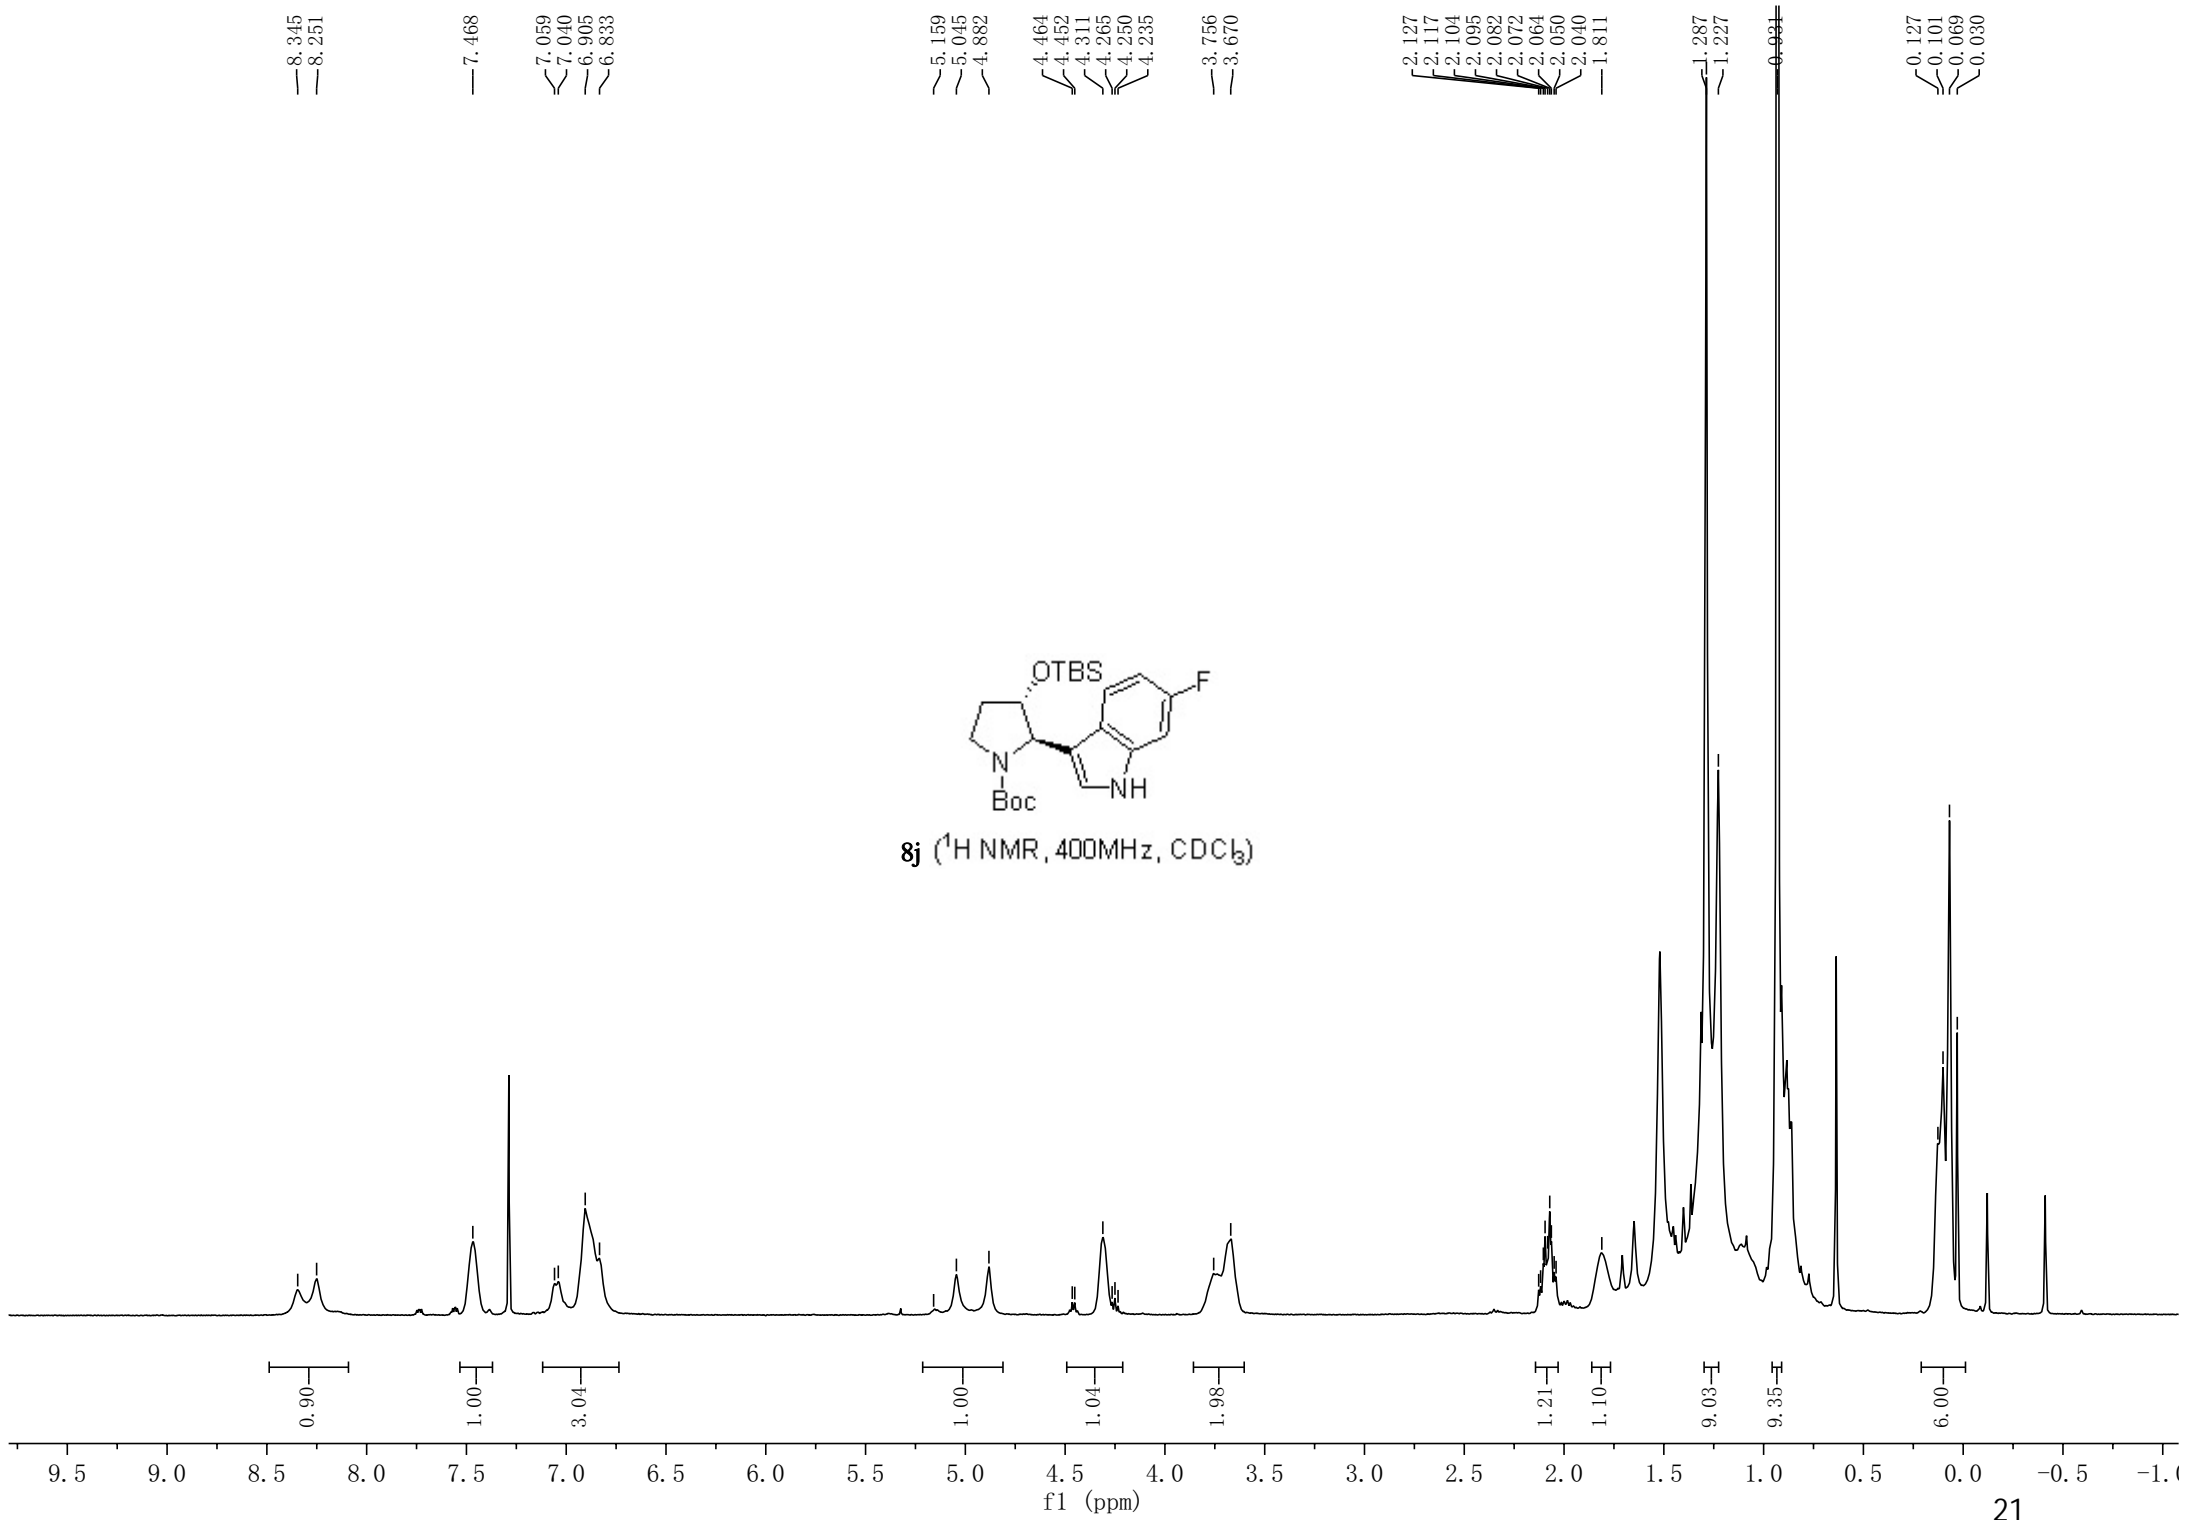

161.061  
160.999  
158.689  
158.637  
155.527  
155.468  
155.443

137.028  
136.909  
136.886  
136.688  
136.633  
136.559

122.330  
122.063  
121.813  
119.276  
119.232  
119.045  
119.014  
117.086  
115.714  
108.194  
107.991

97.871  
97.615

79.565  
79.375

64.100  
63.853

45.096  
44.320

32.532  
31.949  
28.715  
28.387  
25.850  
25.676

18.076

-4.532  
-4.601

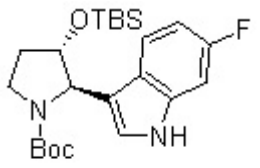

8j (<sup>13</sup>C NMR, 100MHz, CDCl<sub>3</sub>)

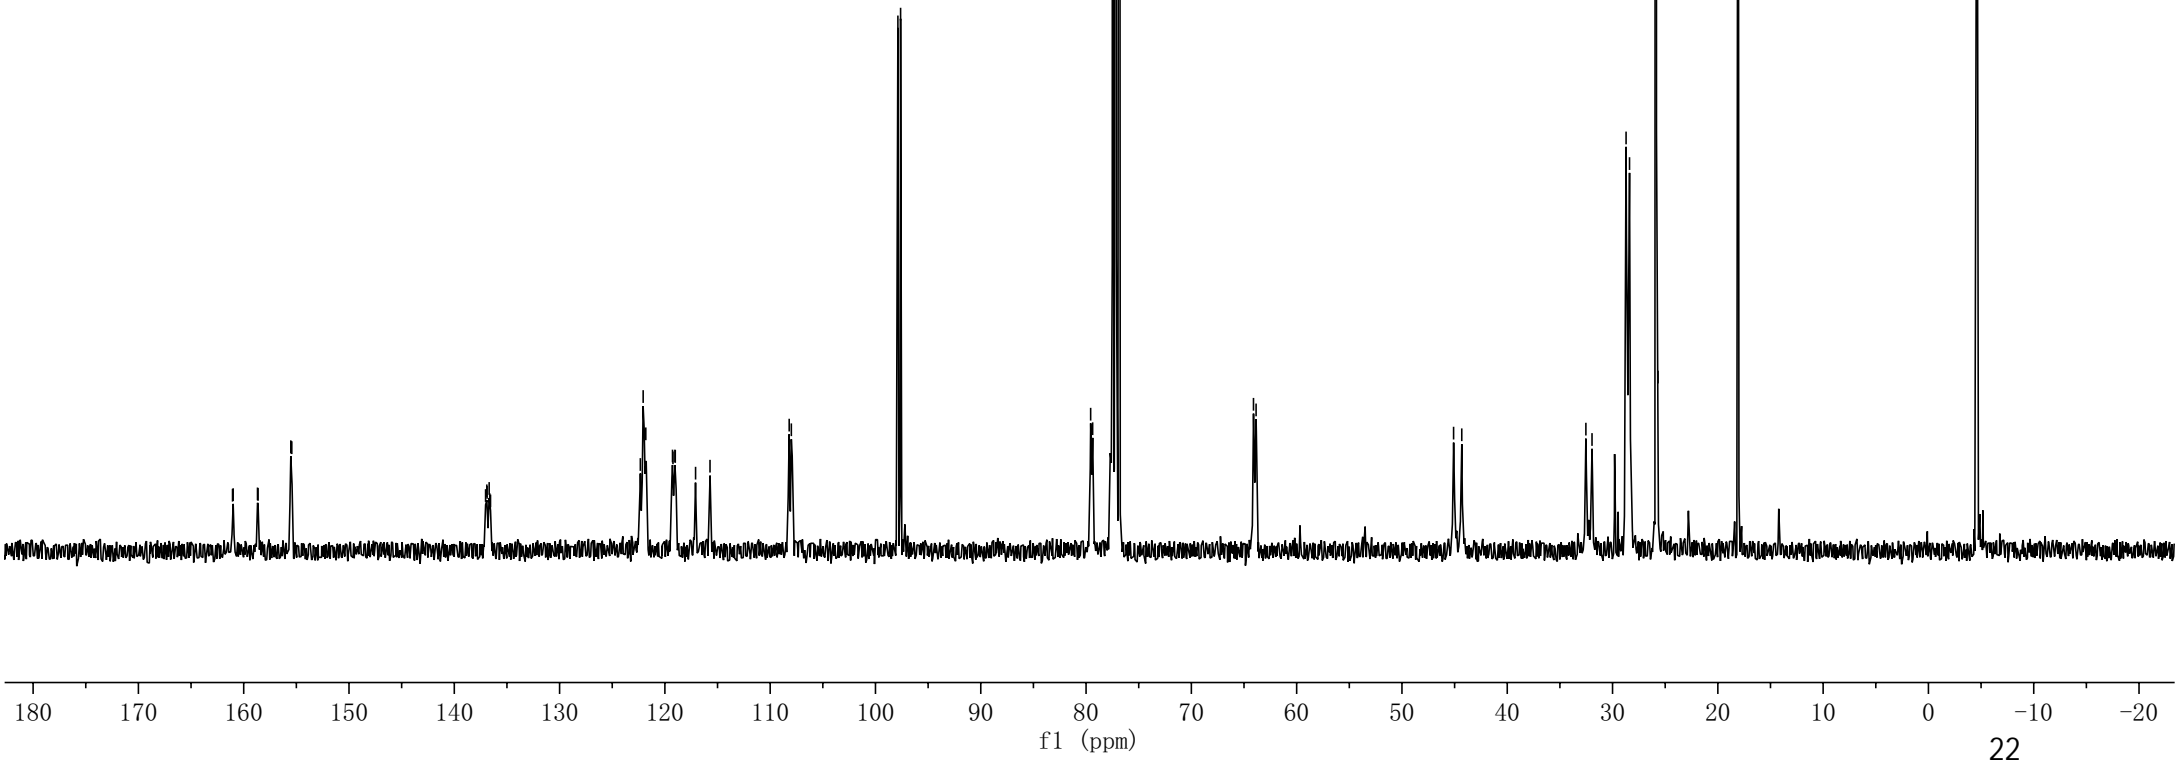

-121.228  
-121.581  
-122.236  
-122.651

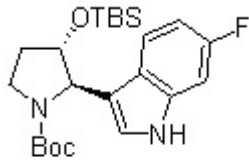

8j (<sup>19</sup>F NMR, 376MHz, CDCl<sub>3</sub>)

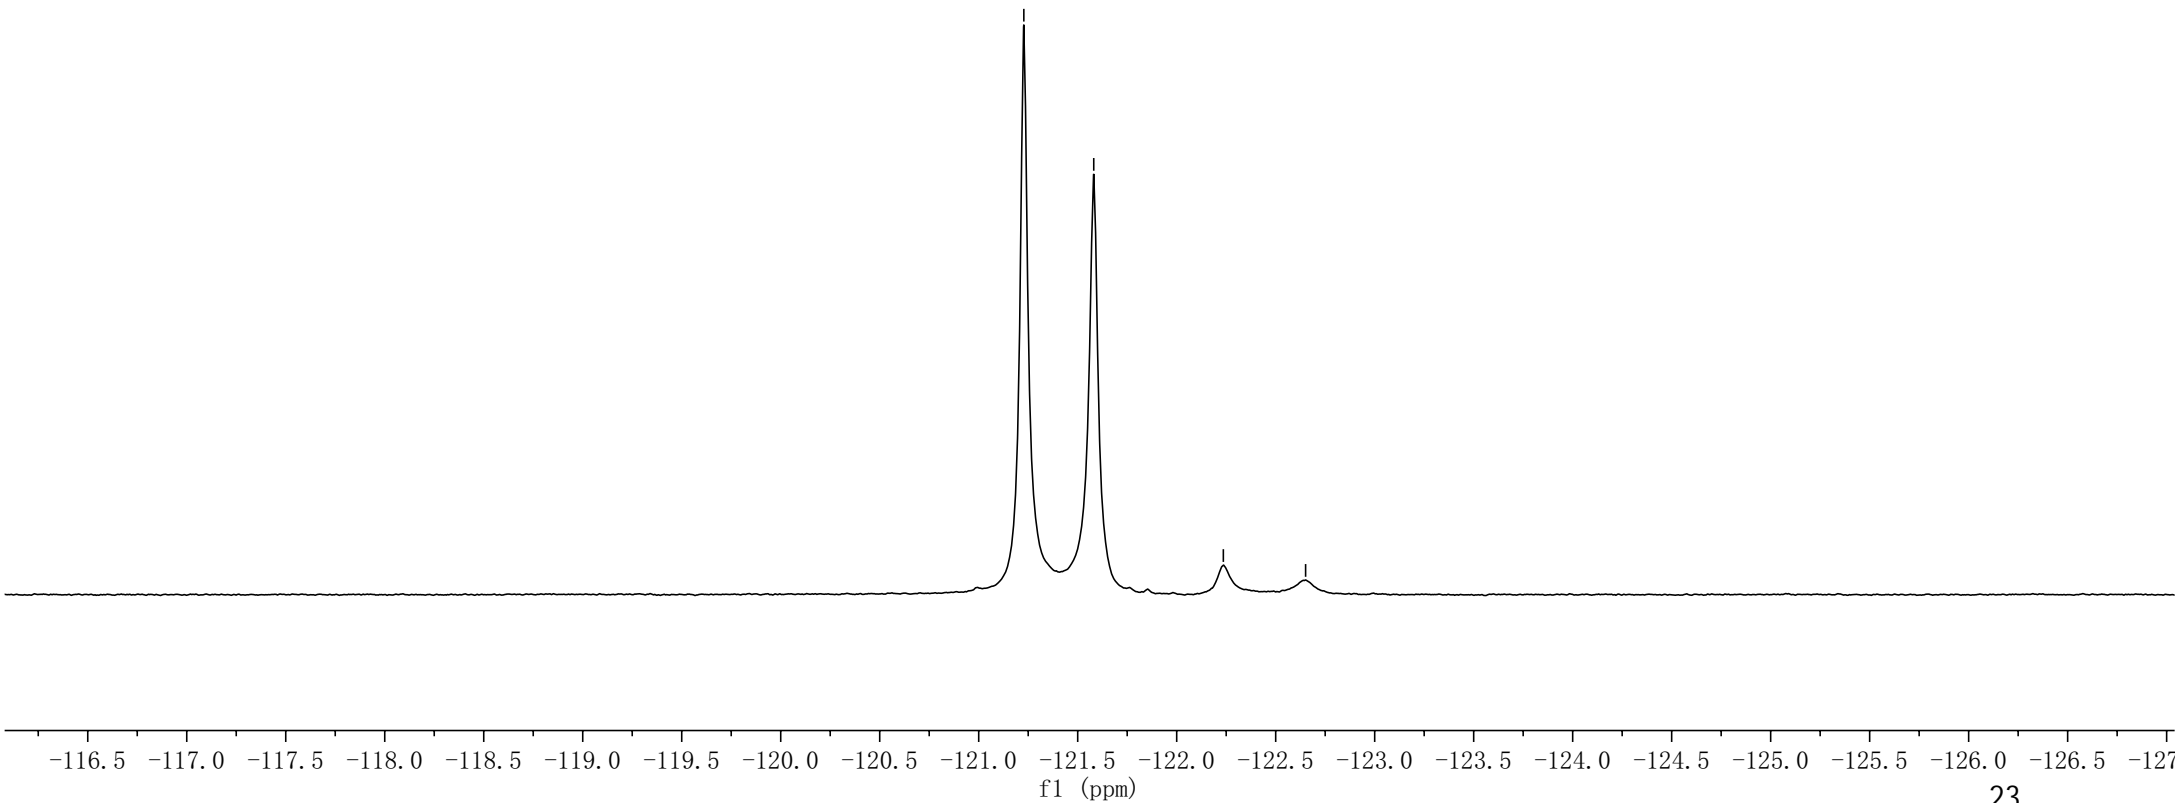

8.473  
8.313

7.467  
7.434  
7.357  
7.140  
7.115  
7.096  
7.054  
6.920  
6.802

5.024  
4.874

4.290

3.754  
3.738  
3.684  
3.664

2.114  
2.104  
2.091  
2.082  
2.072  
2.059  
2.050  
2.036  
2.027  
1.811

1.524

1.222

0.998

0.117  
0.094  
0.063

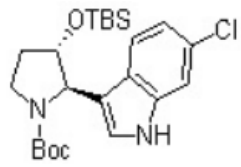

8k: (<sup>1</sup>H NMR, 400MHz, CDCl<sub>3</sub>)

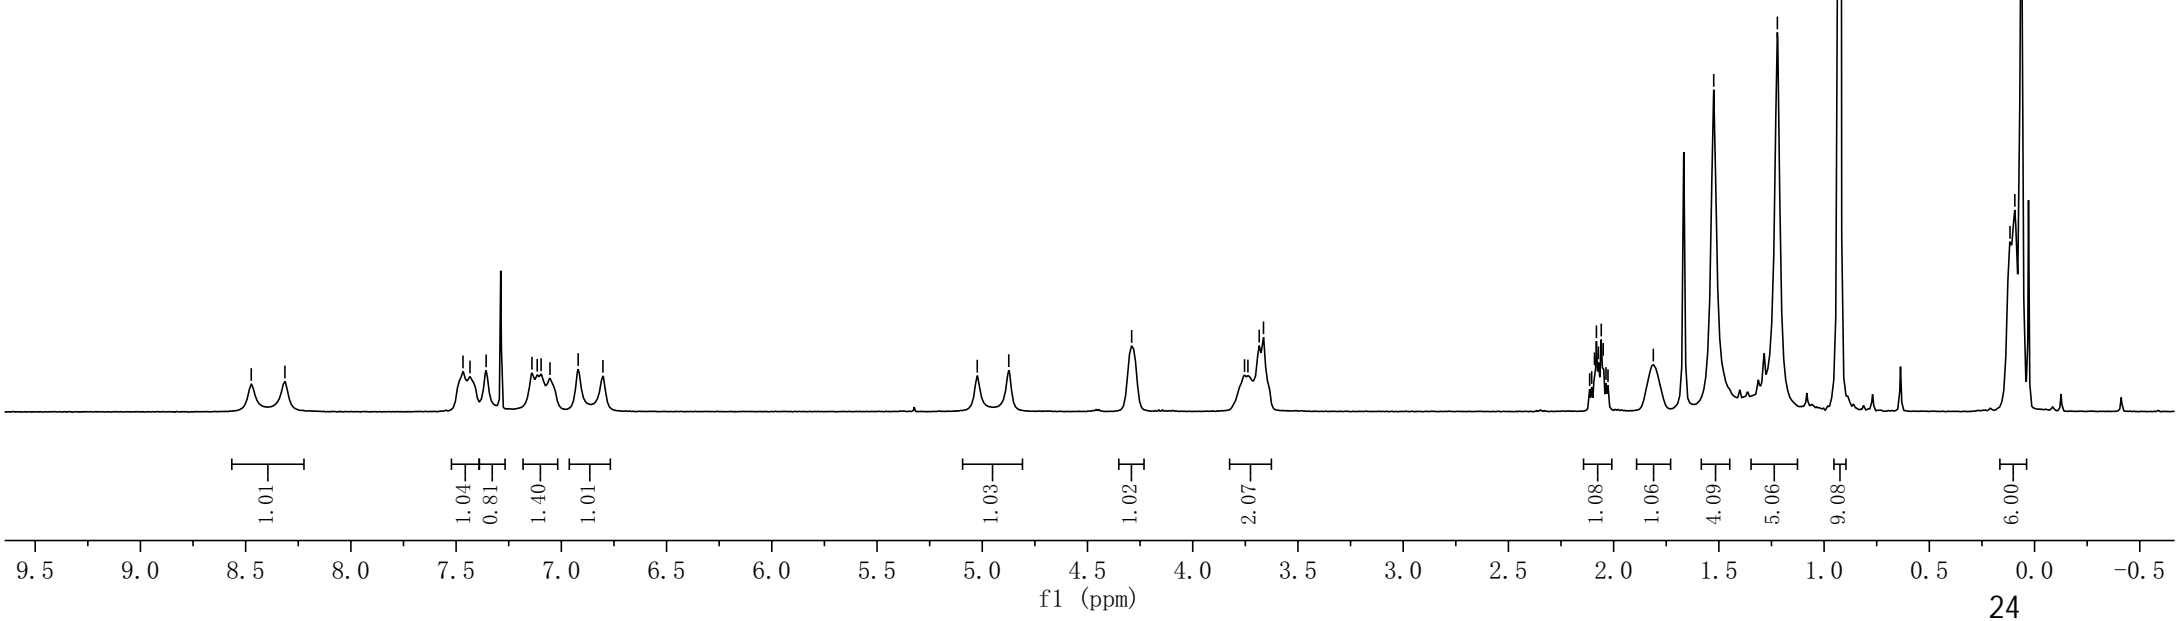



— 155.380

137.264  
136.963

128.014  
124.306  
124.088  
122.233  
122.069  
120.325  
120.210  
119.678  
119.431  
117.715  
116.346  
111.401

79.550

79.368

63.903

63.711

45.073

44.353

32.576

32.027

28.721

28.420

25.885

25.703

— 18.111

— -4.559

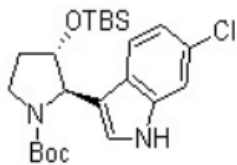

8k (<sup>13</sup>C NMR, 100MHz, CDCl<sub>3</sub>)

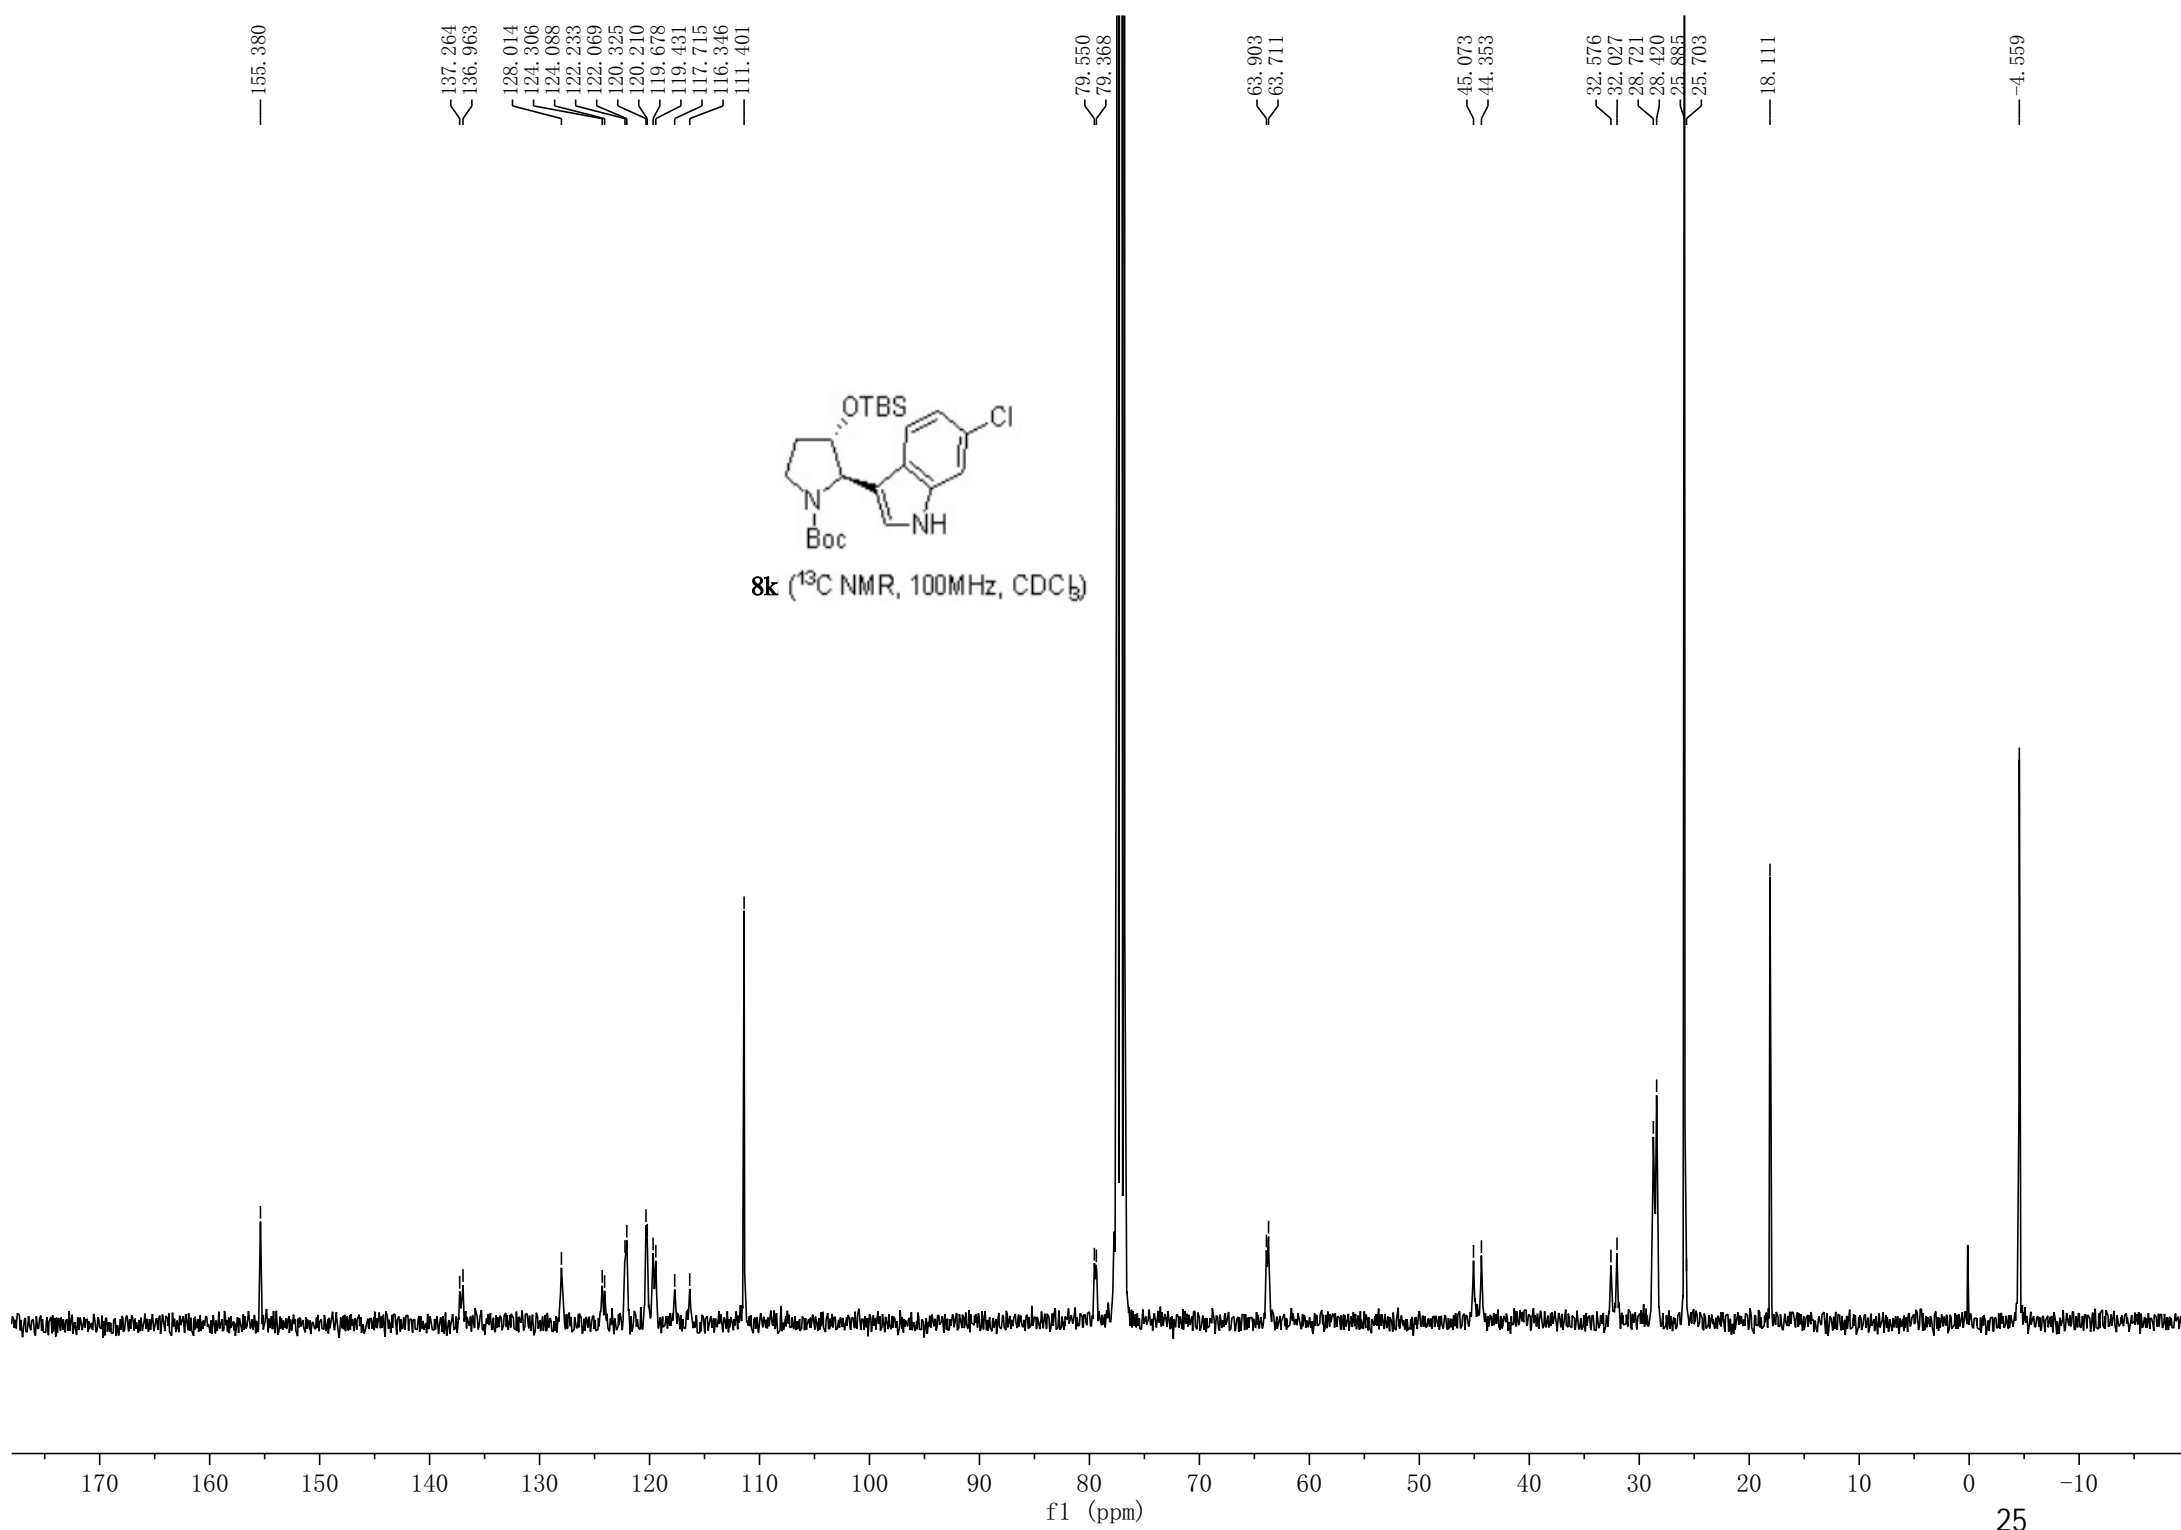

— 8.650  
— 8.471

7.474  
7.414  
7.397  
7.325  
7.307  
7.260  
7.200  
7.133  
7.118  
6.852  
— 6.690

— 4.986  
— 4.852

4.262  
4.230

3.730  
3.711  
3.659  
3.637  
3.616

2.078  
2.068  
2.055  
2.046  
2.035  
2.023  
2.014  
2.000  
1.991  
1.779  
1.726

— 1.511  
1.283  
1.258  
1.200

0.991

0.091  
0.072  
0.036

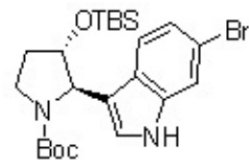

81 ( $^1\text{H}$  NMR, 400MHz,  $\text{CDCl}_3$ )

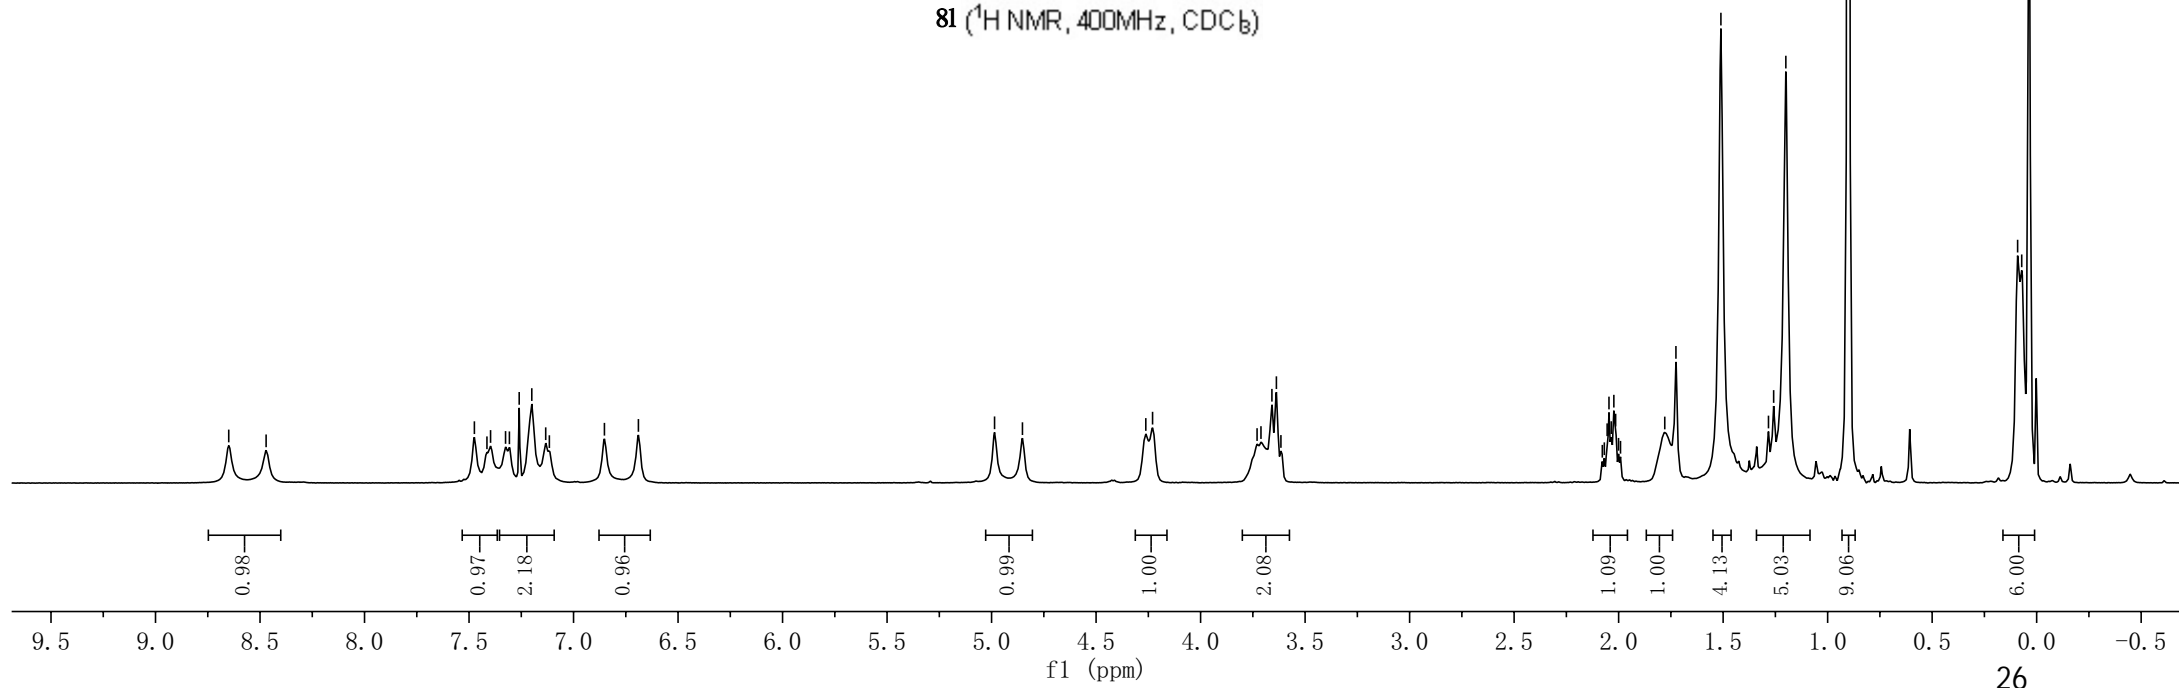

— 155.427

137.652  
137.403

124.597  
124.147  
122.837  
122.603  
122.265  
122.012  
119.990  
119.576  
117.559  
116.033  
115.560  
114.437

79.641  
79.388

63.974  
63.710

45.107  
44.347

32.557  
31.979  
29.827  
28.728  
28.403  
25.878  
25.695

— 18.099

-4.496  
-4.568

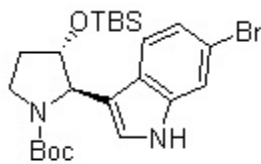

**81** ( $^{13}\text{C}$  NMR, 100MHz,  $\text{CDCl}_3$ )

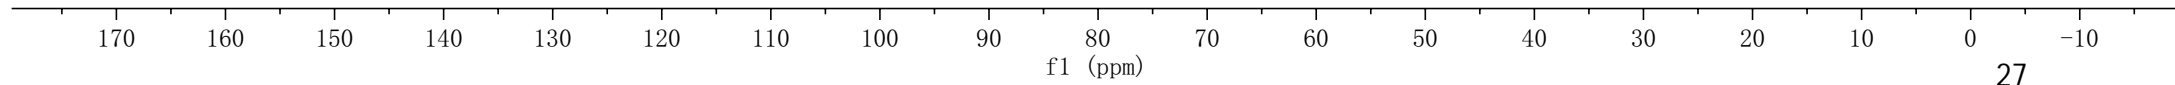

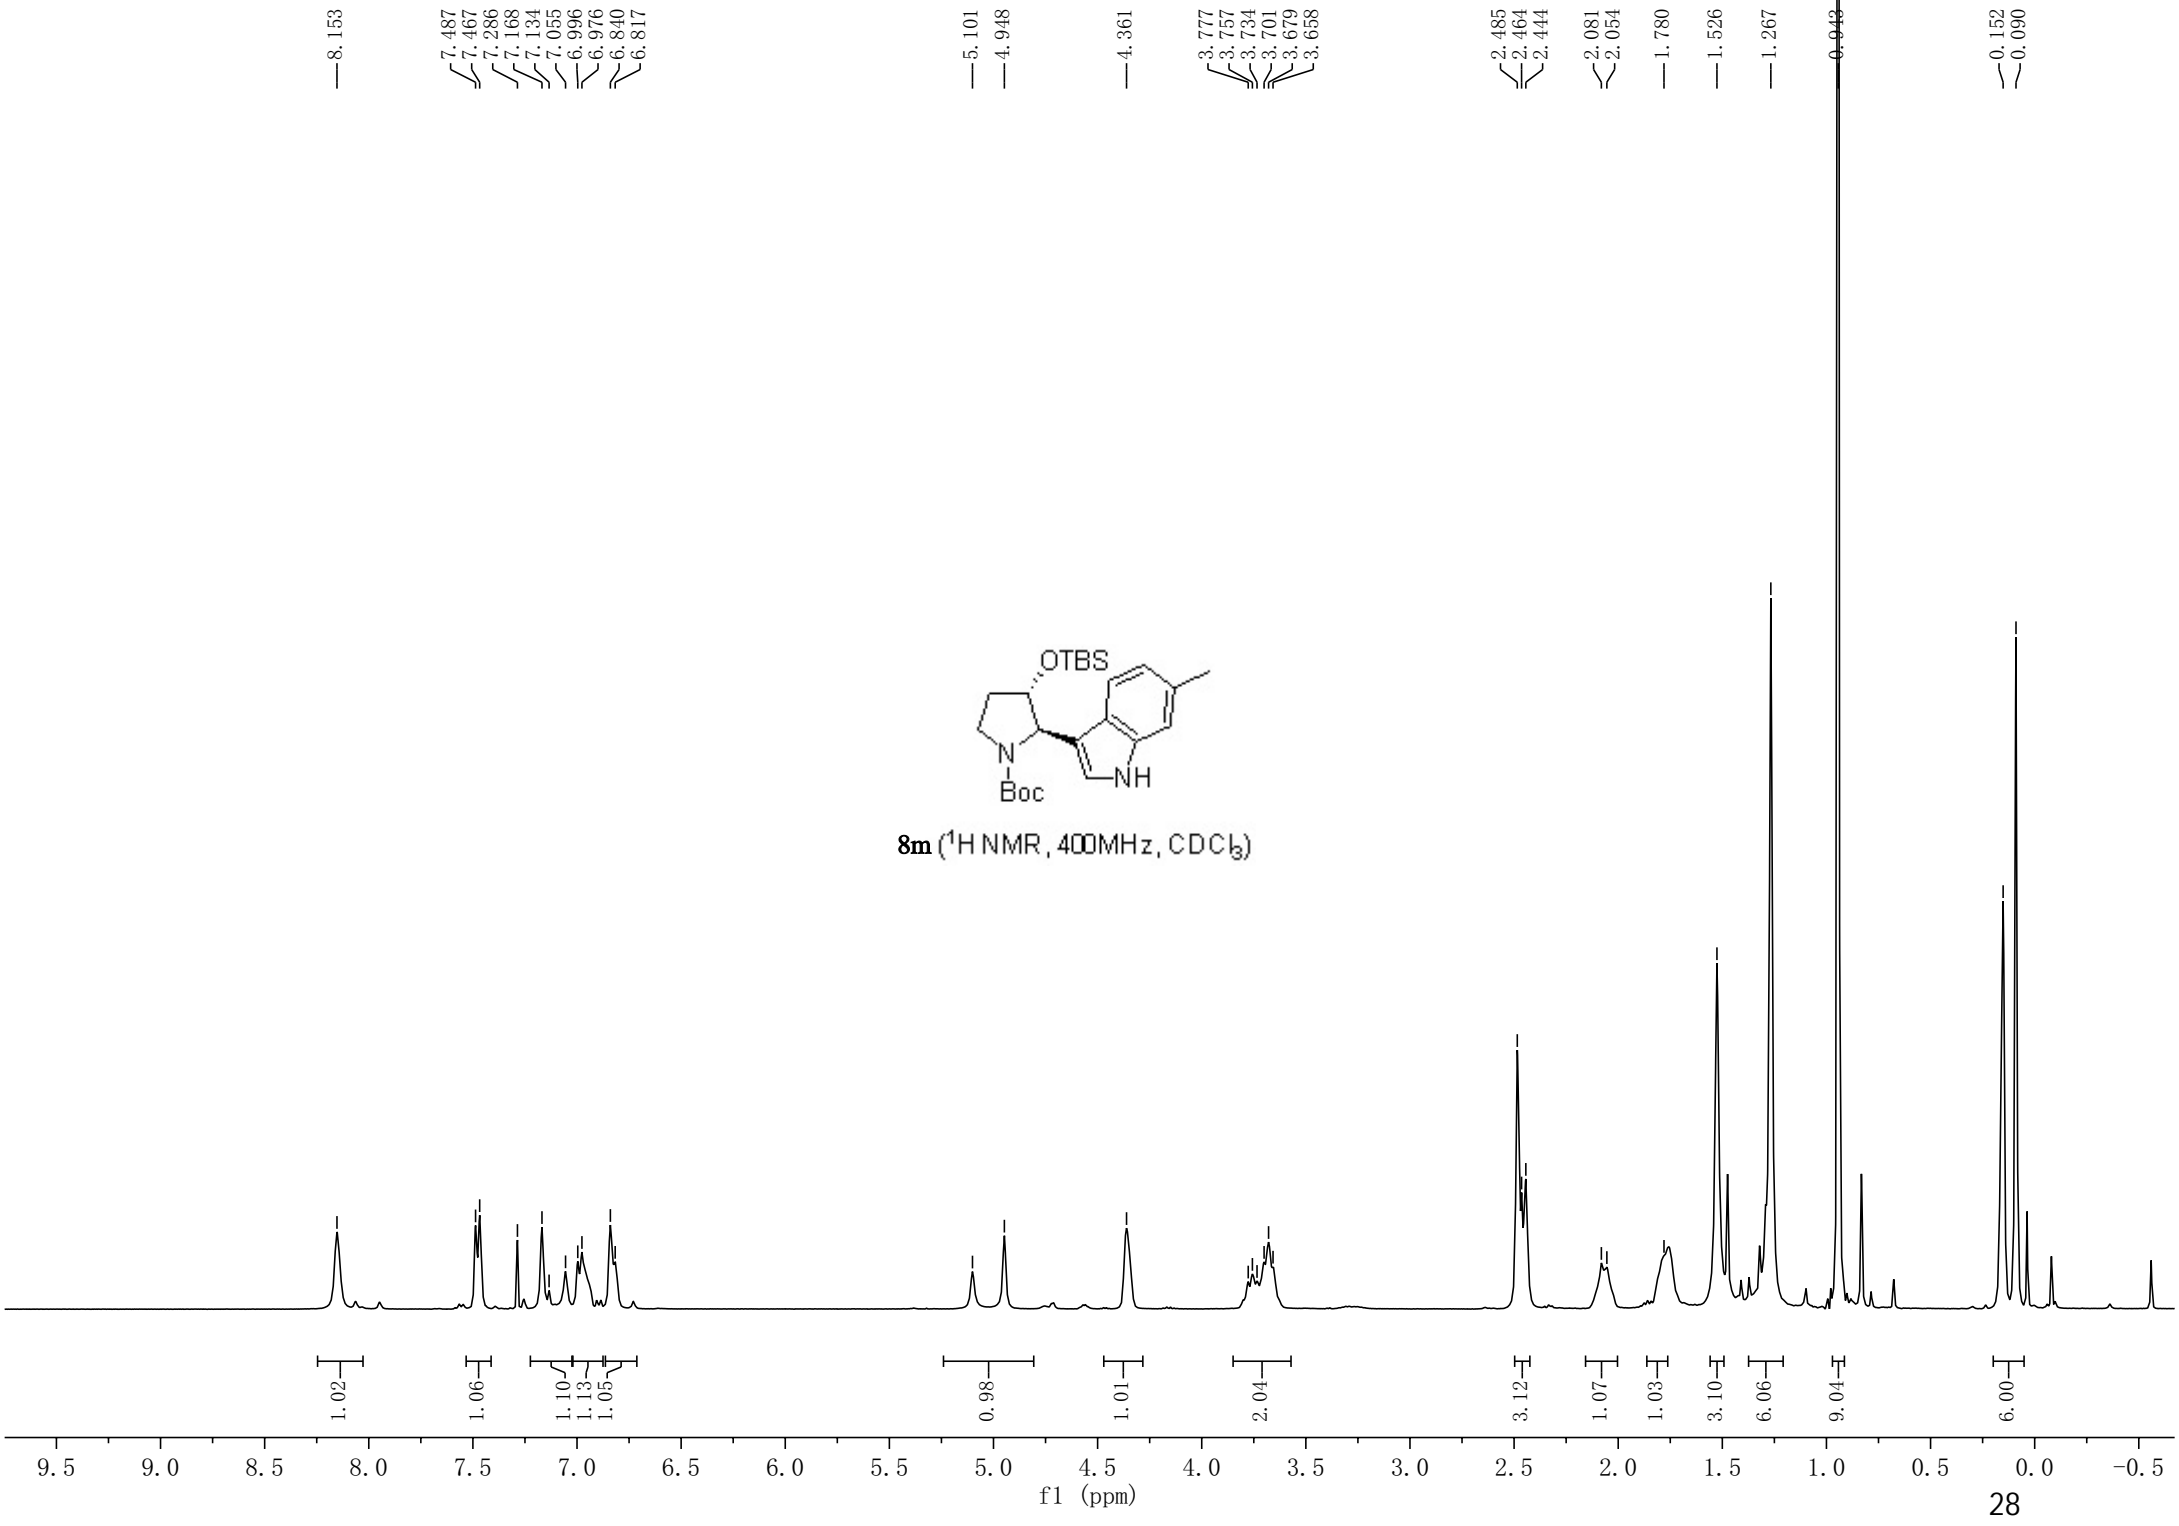

— 155.591

137.470

137.187

— 131.881

123.566

121.328

120.780

118.553

117.192

116.369

— 111.386

— 79.176

— 64.084

44.959

44.276

32.516

31.848

28.730

28.594

28.453

26.130

25.902

21.776

— 18.111

-4.442

-4.534

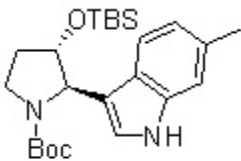

**8m** ( $^{13}\text{C}$  NMR, 100MHz,  $\text{CDCl}_3$ )

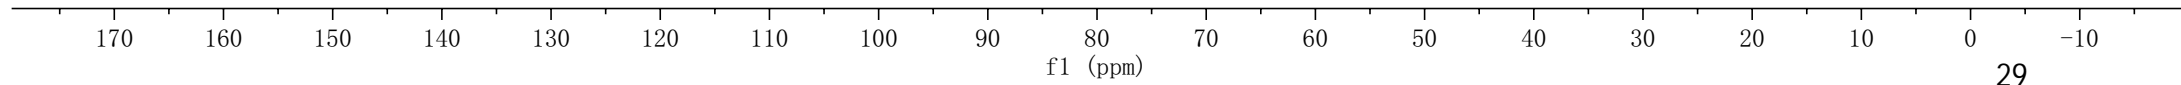



155.772  
155.460

138.516  
138.181

126.019  
125.519  
123.291  
122.971  
122.780  
122.624  
122.509  
120.464  
120.117  
118.188  
116.550  
110.161  
110.064

79.401  
79.292  
78.681

64.515

45.196  
44.542

30.919  
30.448  
29.841  
28.814  
28.494  
25.900  
25.564

18.051

-4.226  
-4.362

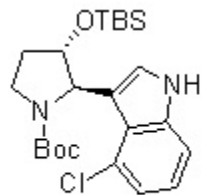

**8n** ( $^{13}\text{C}$  NMR, 100MHz,  $\text{CDCl}_3$ )

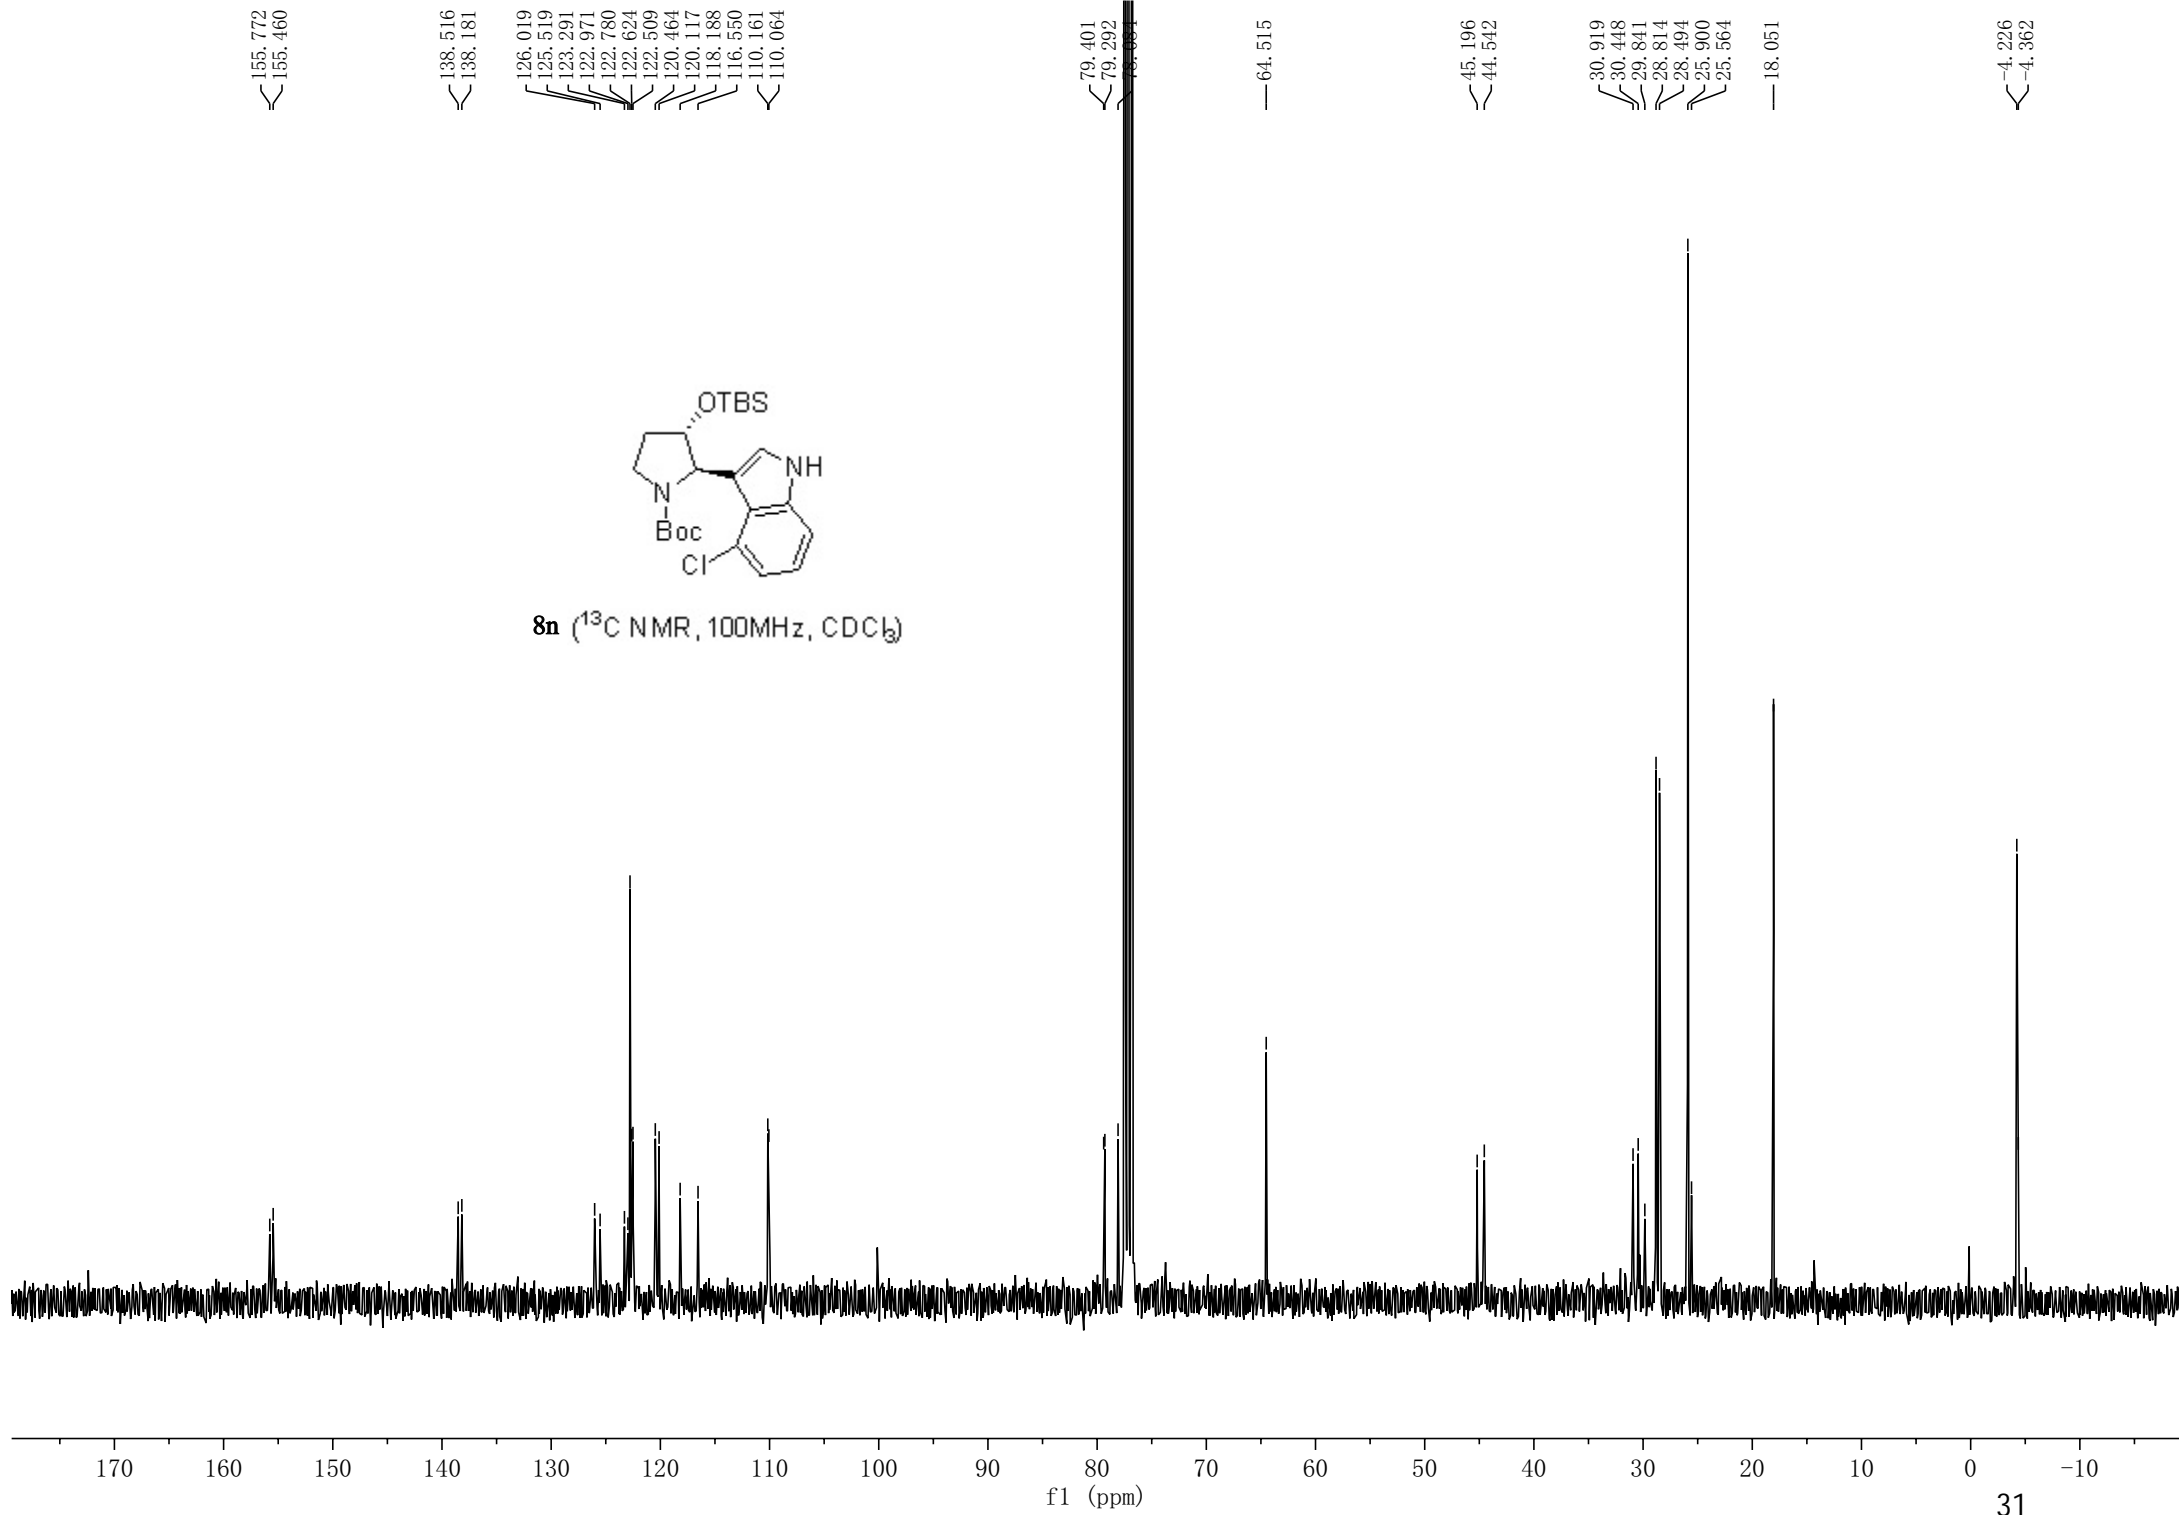

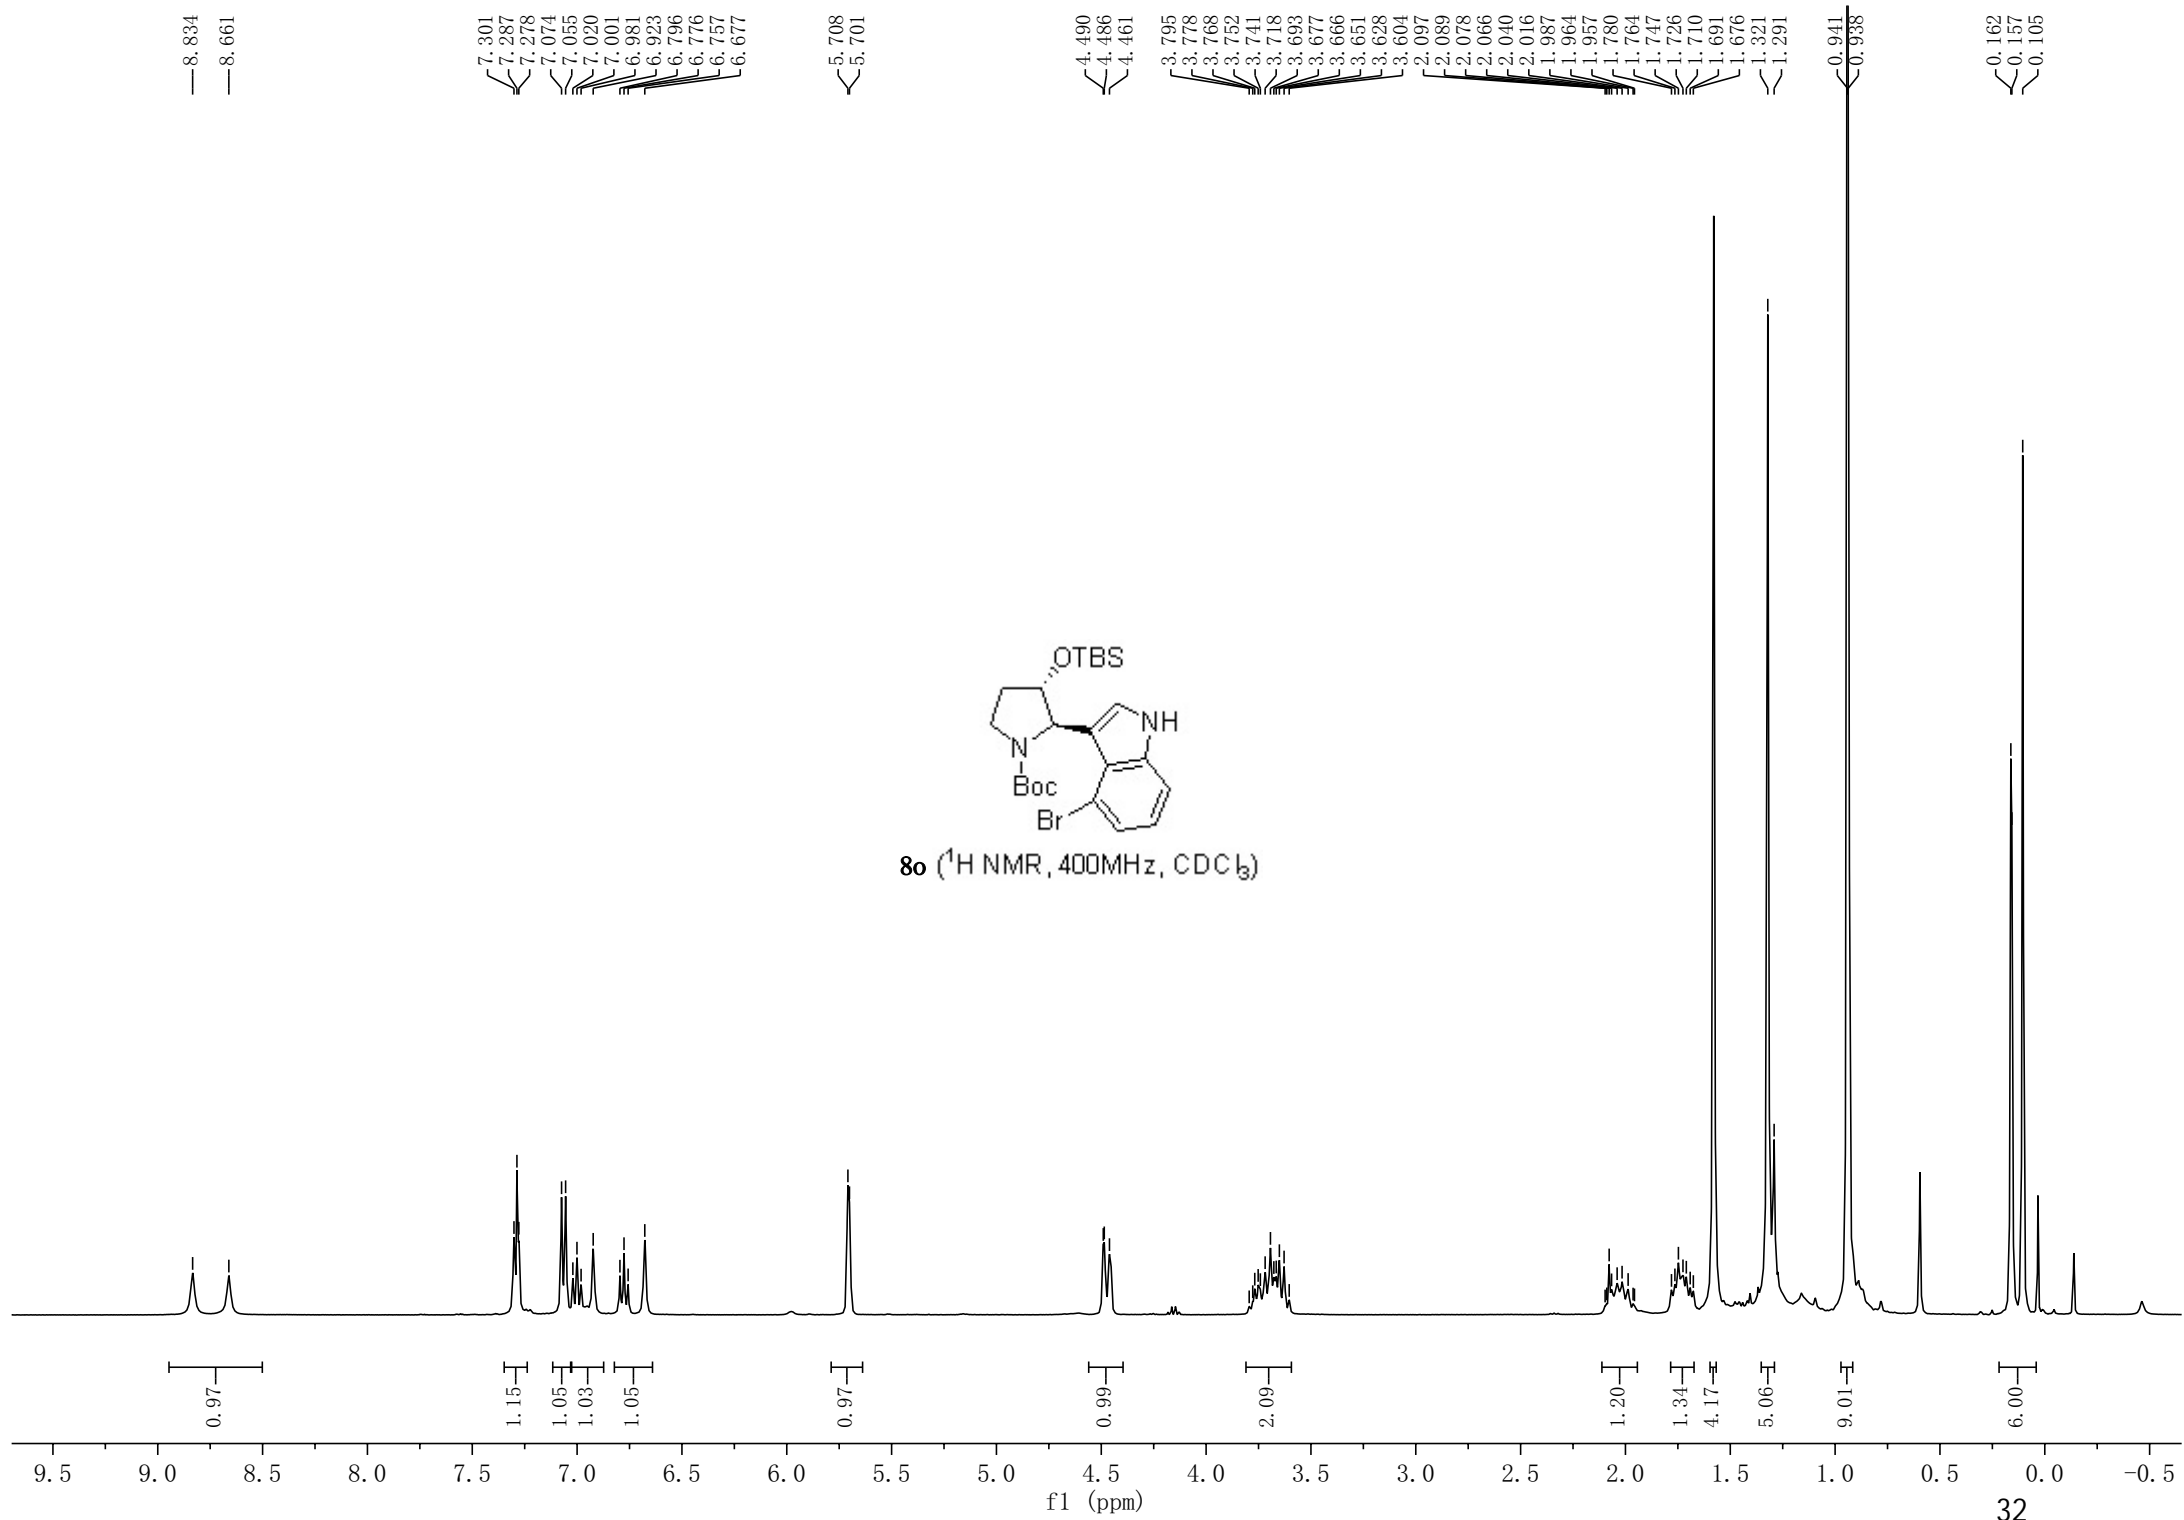





8.271  
8.154

7.192  
7.172  
7.107  
7.086  
7.067  
7.047  
7.019  
7.000  
6.881  
6.862  
6.845

5.434  
5.314

4.343  
4.319

3.713  
3.690  
3.653  
3.633

2.732

2.109  
2.086  
2.056

1.725  
1.512  
1.433  
1.383  
1.345  
1.295  
1.264

0.014

0.097  
0.080  
0.062  
0.011

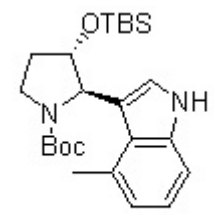

8p (<sup>1</sup>H NMR, 400MHz, CDCl<sub>3</sub>)

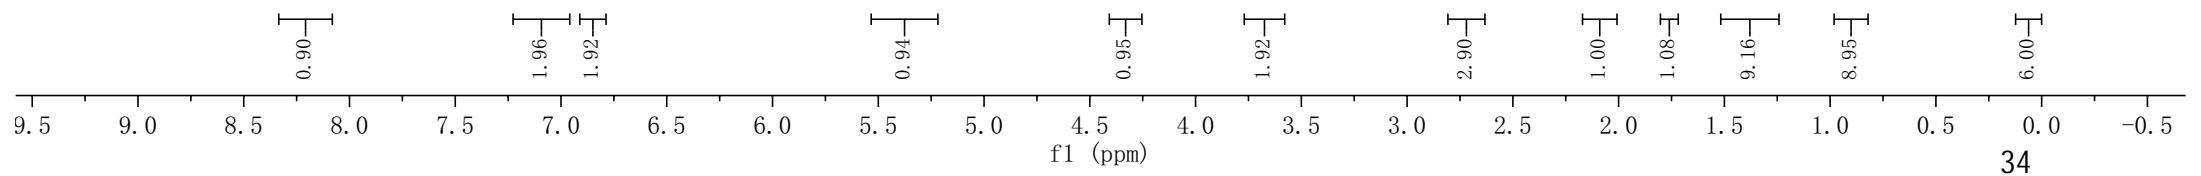



—8.914  
—8.682

7.535  
7.515  
7.489  
7.470  
7.249  
7.225  
7.206  
7.185  
7.160  
7.034  
6.917  
6.897  
6.878  
6.777

—5.297  
—5.253

—4.200  
3.739  
3.727  
3.701  
3.681  
3.669  
3.653  
3.642  
3.620  
3.594

2.181  
2.174  
2.149  
2.123  
2.097  
2.089  
2.077  
2.049  
2.023  
1.999  
1.788  
1.759  
1.748  
1.727  
1.713  
1.694  
1.680  
1.531  
1.283  
1.254  
1.220  
0.912

0.097  
0.081  
0.035  
-0.001

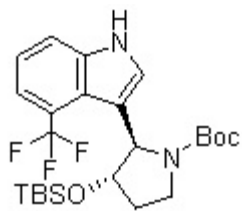

8q (<sup>1</sup>H NMR, 400MHz, CDCl<sub>3</sub>)

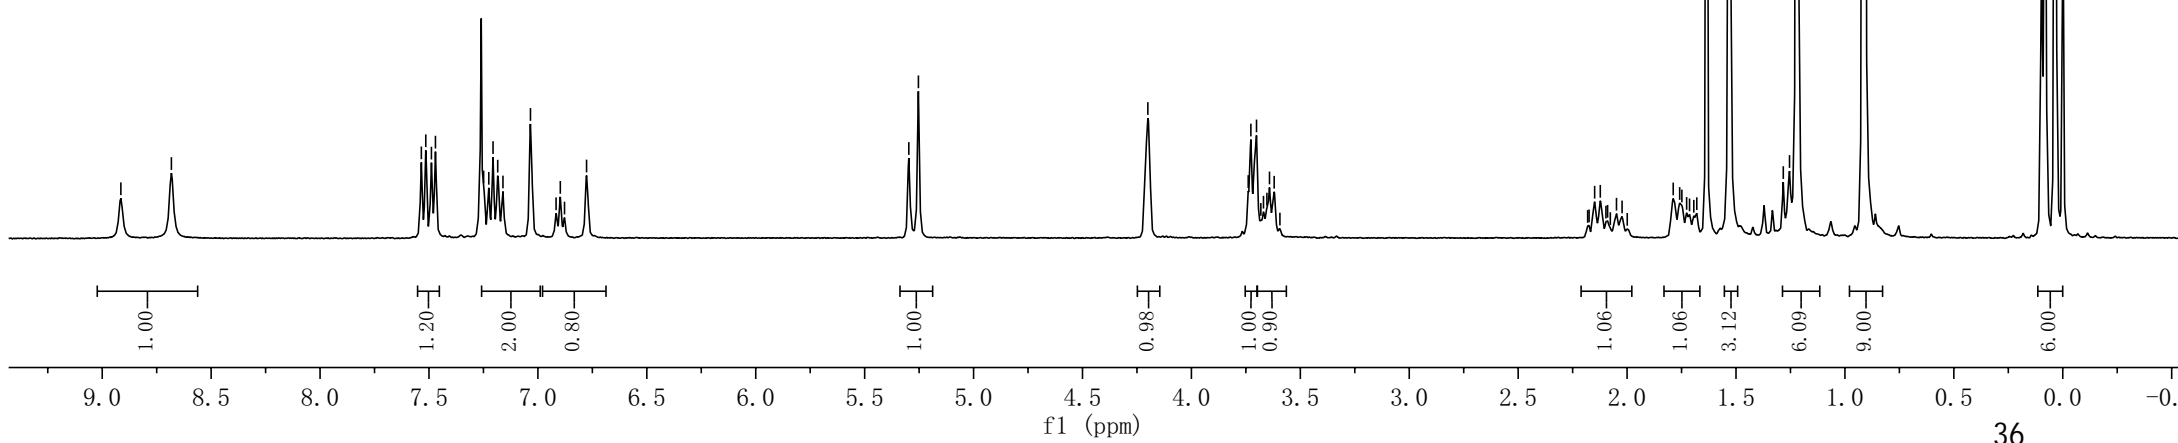

155.695  
155.438

138.088  
137.722

124.761  
124.561  
121.117  
120.846  
120.527  
120.369  
118.198  
116.173  
115.624

79.458  
79.298  
76.444

64.387  
64.351

45.059  
44.395

31.001  
30.420  
28.834  
28.366  
25.866

18.038

-4.193  
-4.320  
-4.849  
-4.977

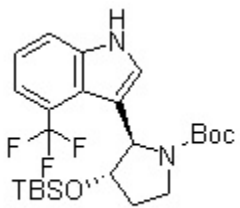

8q (<sup>13</sup>C NMR, 100MHz, CDCl<sub>3</sub>)

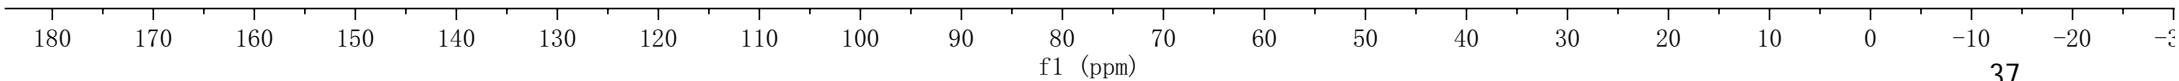



7.944  
7.821  
7.407  
7.377  
7.357  
7.245  
7.230  
7.193  
7.173  
7.144  
7.138  
7.072  
7.053  
7.029  
7.027  
7.010  
6.992  
6.990  
6.970  
6.968  
6.951  
6.933

4.969  
4.686  
4.429  
4.328  
4.227

3.811  
3.728  
3.712  
3.701  
3.694  
3.685  
3.667

2.364  
2.130  
2.050  
1.982  
1.876

1.445  
1.379  
1.342  
1.021  
0.922  
0.852

0.006  
-0.002  
-0.011  
-0.098  
-0.142

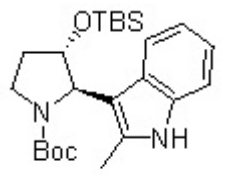

8r (<sup>1</sup>H NMR, 400MHz, CDCl<sub>3</sub>)

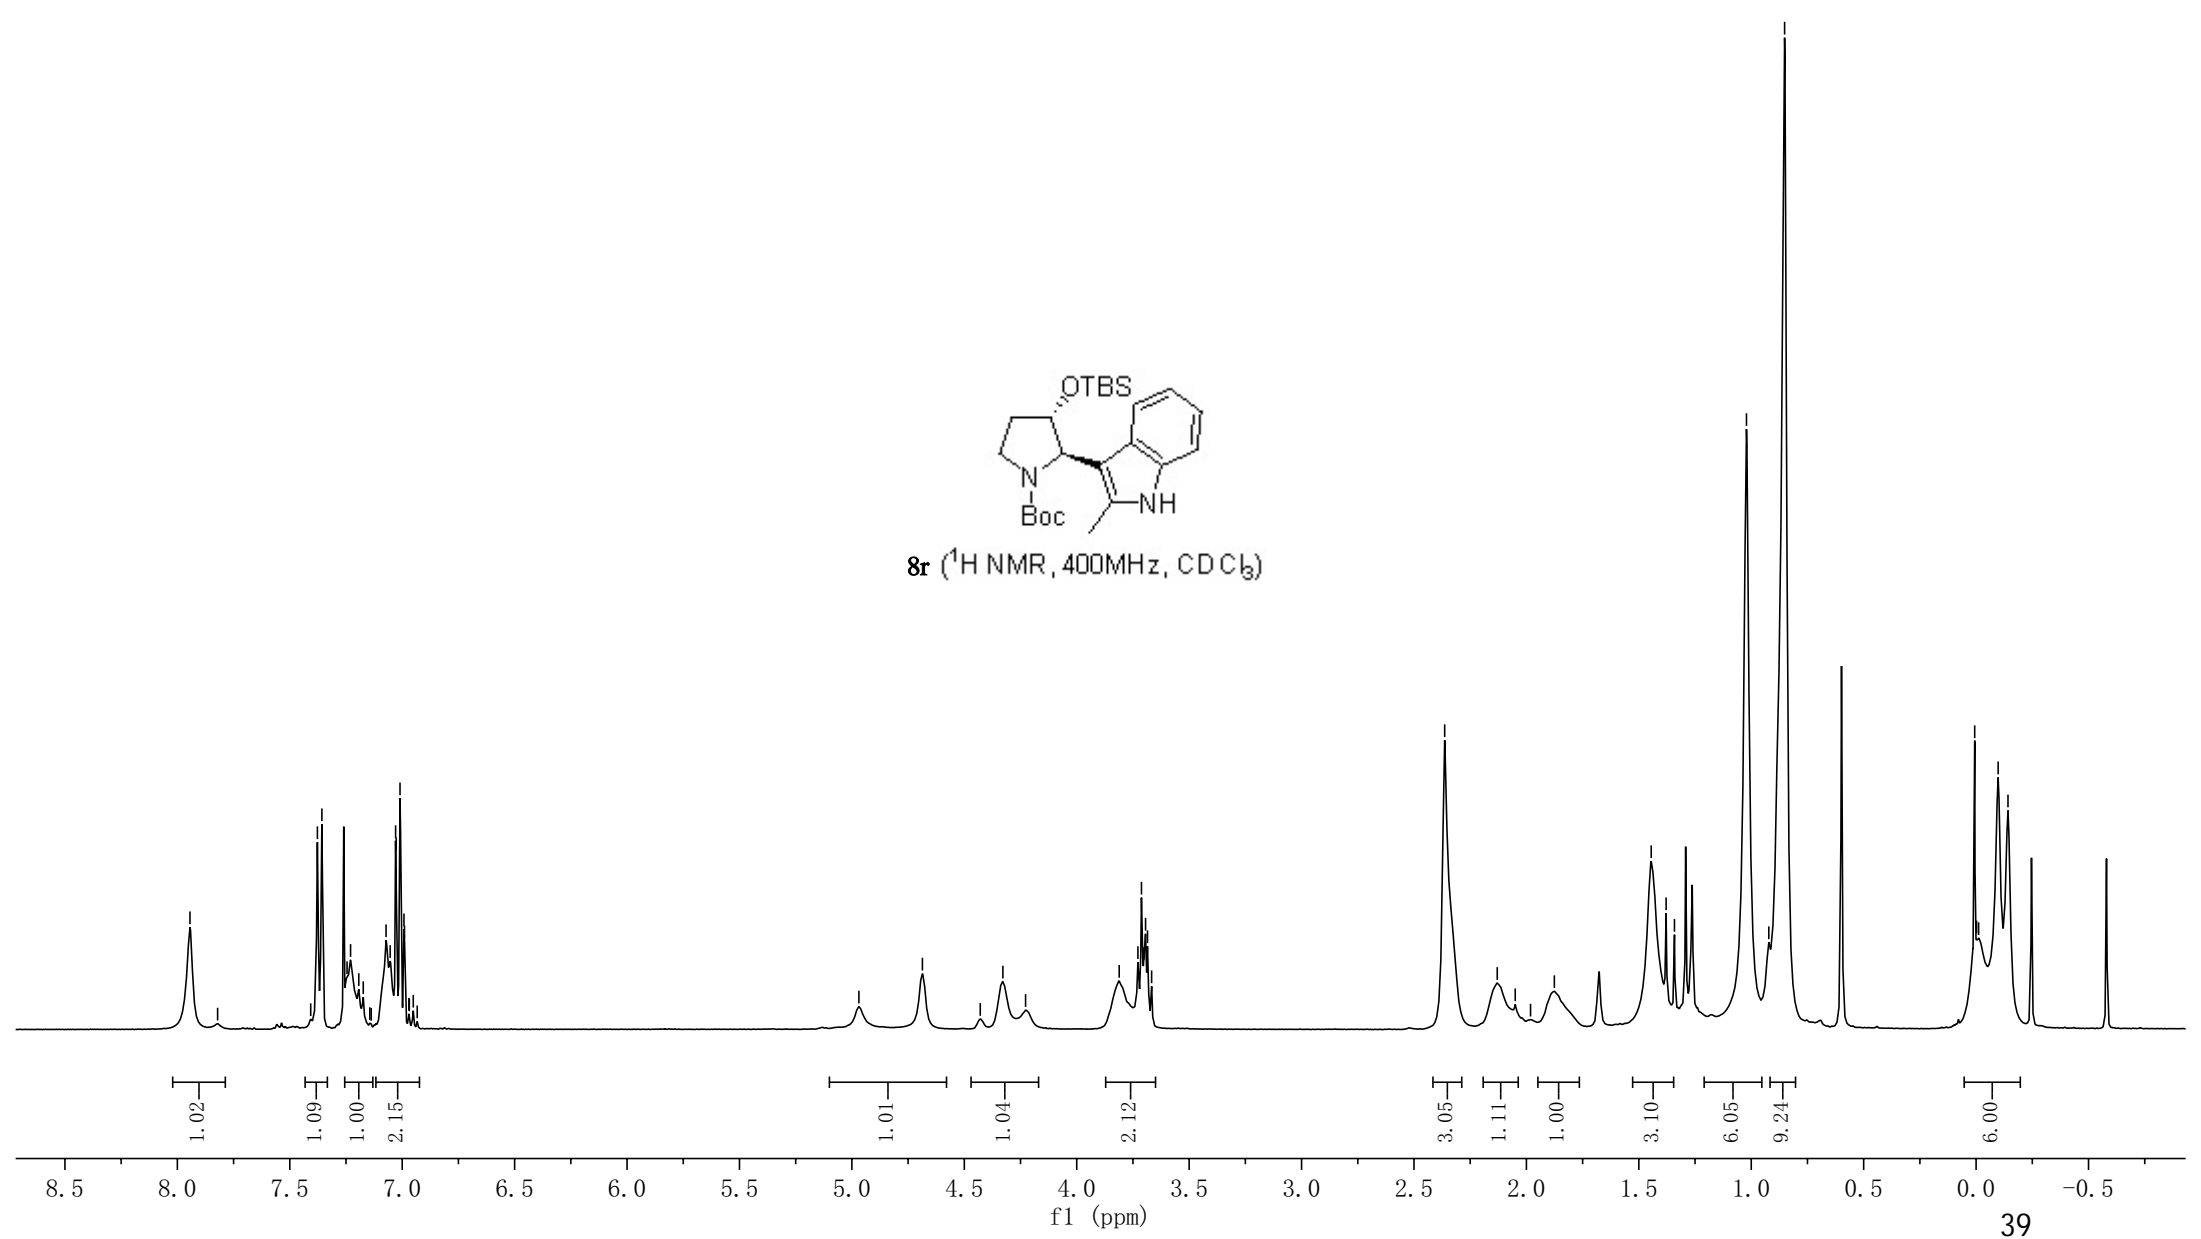

155.175  
135.426  
131.311  
126.802  
120.842  
119.355  
118.364  
111.825  
110.349  
78.831  
78.833  
63.682  
62.824  
45.453  
44.776  
34.381  
33.157  
30.347  
29.825  
28.681  
28.183  
25.629  
25.687  
18.025  
12.131  
-4.826  
-5.477

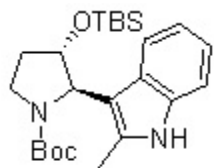

8r (<sup>13</sup>C NMR, 100MHz, CDCl<sub>3</sub>)

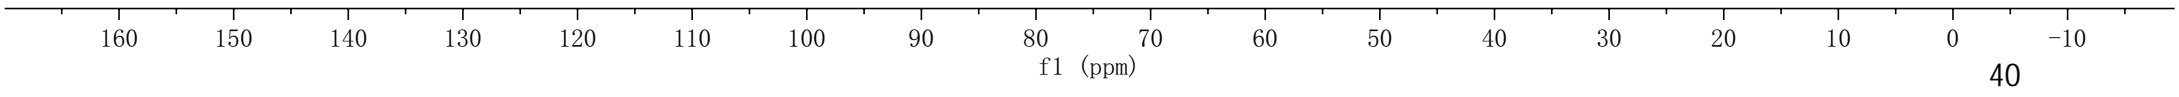





— 155.028  
— 136.764  
— 132.901  
— 125.804  
— 120.349  
— 118.943  
— 118.352  
— 111.212  
— 108.508  
— 78.612  
— 63.844  
— 63.132  
— 45.359  
— 44.668  
— 34.208  
— 33.066  
— 29.707  
— 29.307  
— 29.217  
— 28.564  
— 28.026  
— 25.713  
— 25.528  
— 17.908  
— 10.466  
— 4.887  
— 5.545  
— 5.611

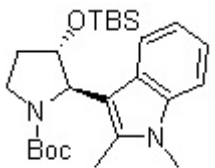

8s (<sup>13</sup>C NMR, 100MHz, CDCl<sub>3</sub>)

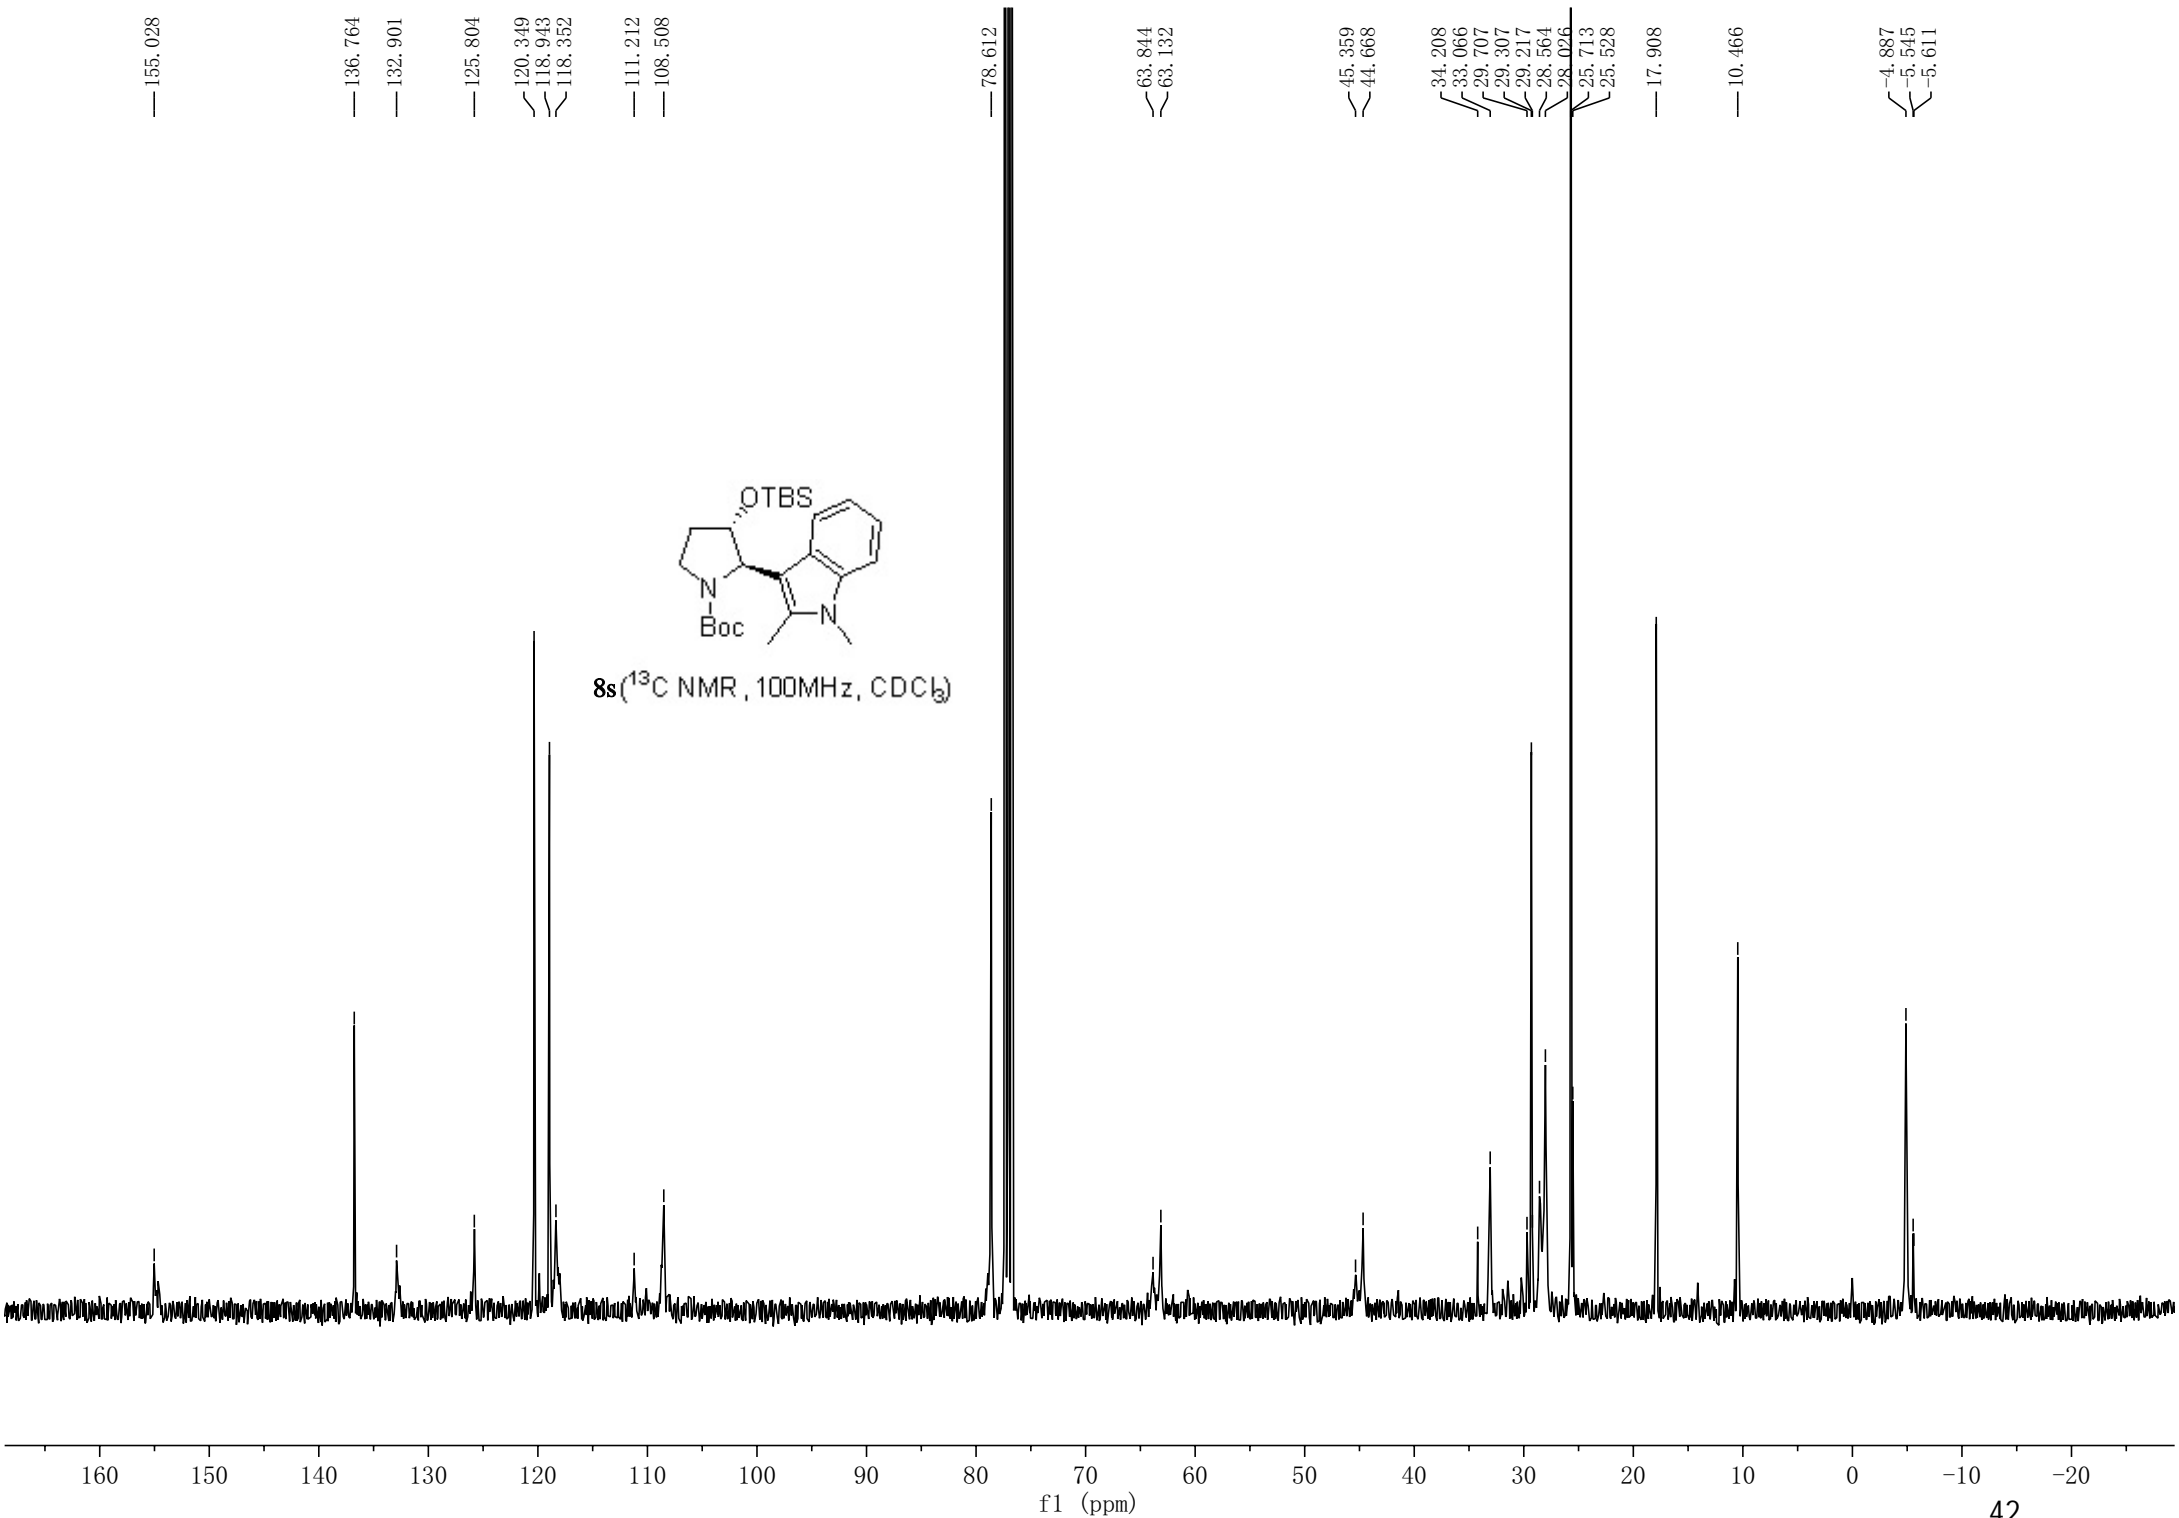

— 8.725  
— 8.474

7.260  
7.148  
7.089  
6.891  
6.788  
6.726

— 4.897  
— 4.779

— 4.242  
— 4.188

3.712  
3.660  
3.654  
3.633  
3.613  
3.606

2.088  
2.078  
2.065  
2.056  
2.046  
2.033  
2.024  
2.011  
2.001  
1.803  
1.508

1.283  
1.254  
1.200

0.897

0.071  
0.032  
-0.002

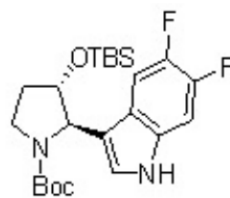

8t (<sup>1</sup>H NMR, 400MHz, CDCl<sub>3</sub>)

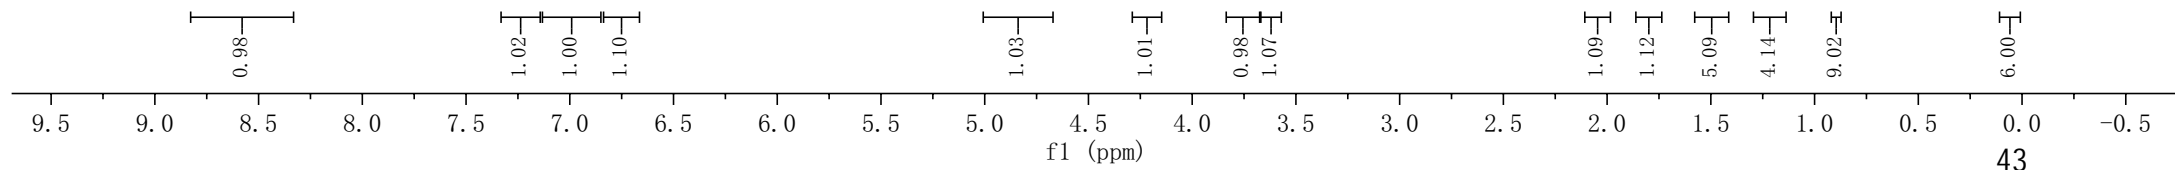

155.428  
149.098  
147.574  
146.685  
145.159

131.856  
131.518

123.116  
122.773  
120.895  
120.407  
117.589  
115.889

105.236  
104.919  
104.737  
99.397  
99.184

79.795  
79.461

63.964  
63.584

45.190  
44.330

32.663  
32.062  
28.708  
28.388  
25.800

18.100

-4.592

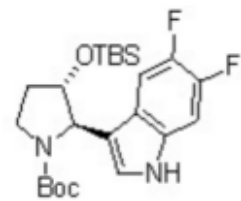

8t (<sup>13</sup>C NMR, 100MHz, CDCl<sub>3</sub>)

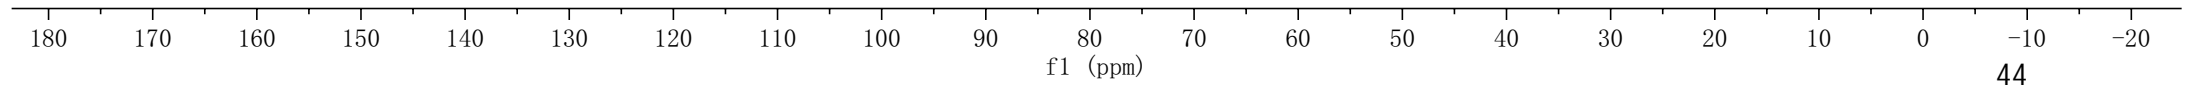

-143.817  
-143.871

-144.384  
-144.439

-147.277  
-147.331

-147.792  
-147.846

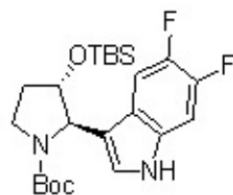

8t (<sup>19</sup>F NMR, 376MHz, CDCl<sub>3</sub>)

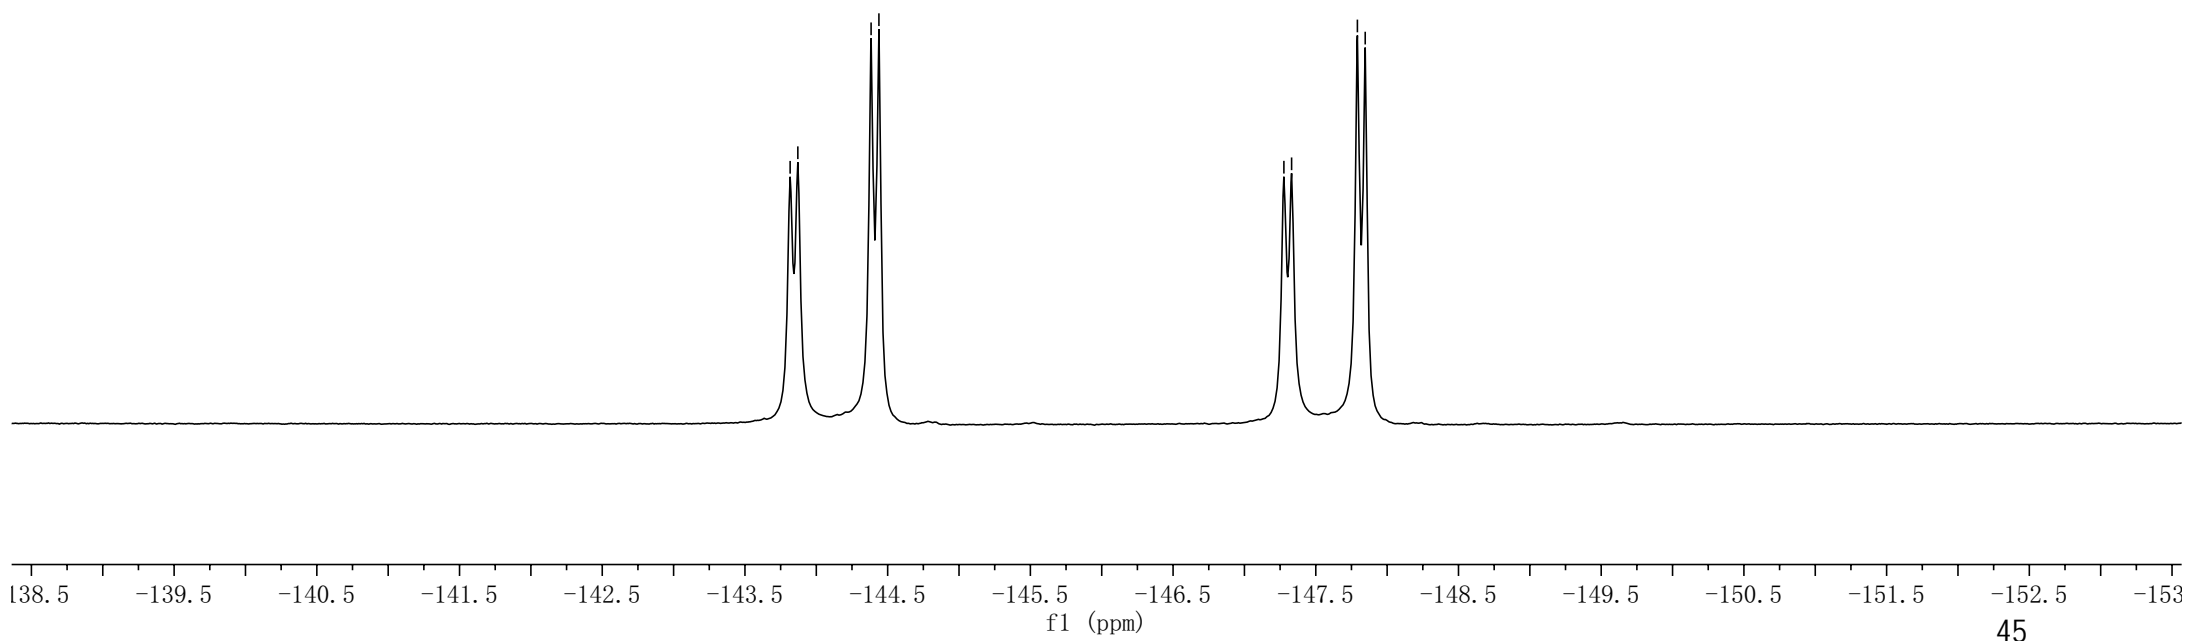

8.998  
8.875  
8.663  
8.491  
8.453

7.613  
7.485  
7.443  
7.385  
7.324  
6.994  
6.863  
6.712  
6.613

4.994  
4.879  
4.807

4.388  
4.248  
4.181

3.712  
3.701  
3.653  
3.631  
3.610

2.059  
2.049  
2.037  
2.027  
2.016  
2.005  
1.996  
1.982  
1.954  
1.940  
1.924  
1.910  
1.893  
1.801  
1.532  
1.498  
1.490  
1.423  
1.278  
1.253  
1.222  
1.068  
0.904  
0.877  
0.868  
0.851  
0.746  
0.601

0.076  
0.036  
-0.002  
-0.174  
-0.393  
-0.496

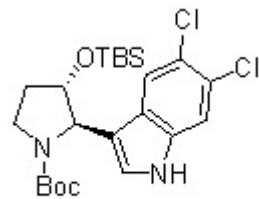

**8u** ( $^1\text{H NMR}$ , 400MHz,  $\text{CDCl}_3$ )

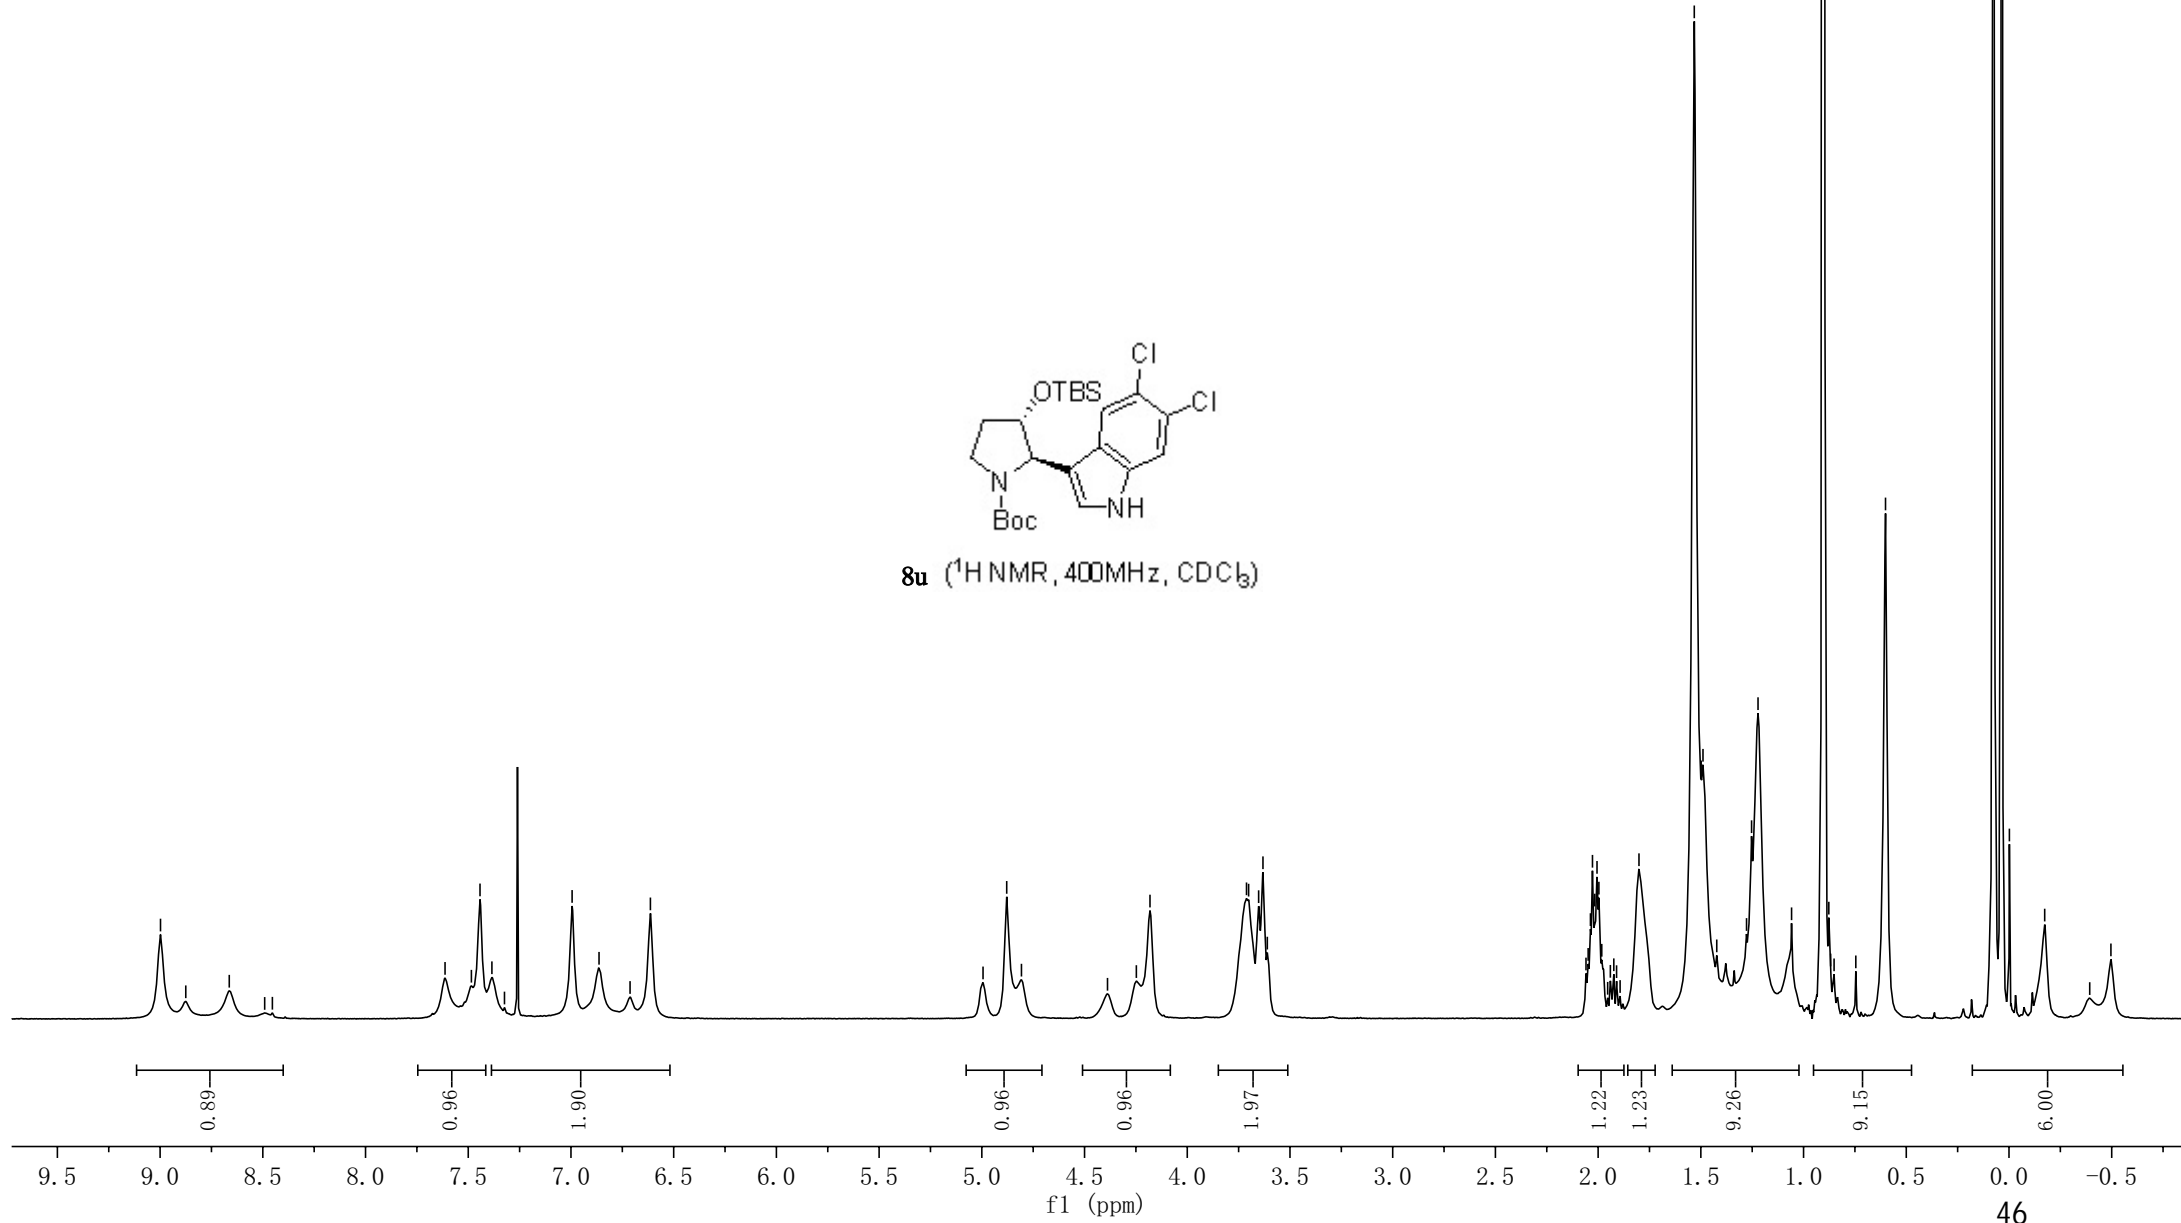

155.532  
155.214

135.565

125.591  
124.685  
123.714  
123.257  
119.857  
119.085  
117.062  
115.013  
112.891  
112.386

79.973  
79.601  
74.486

63.924  
63.487

45.232  
44.367

32.621  
32.053  
28.726  
28.463  
25.874  
25.647

18.107  
17.988

-4.577  
-5.186

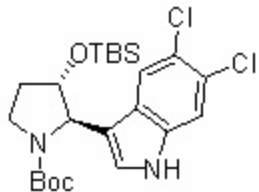

**8u** (<sup>13</sup>C NMR, 100MHz, CDCl<sub>3</sub>)

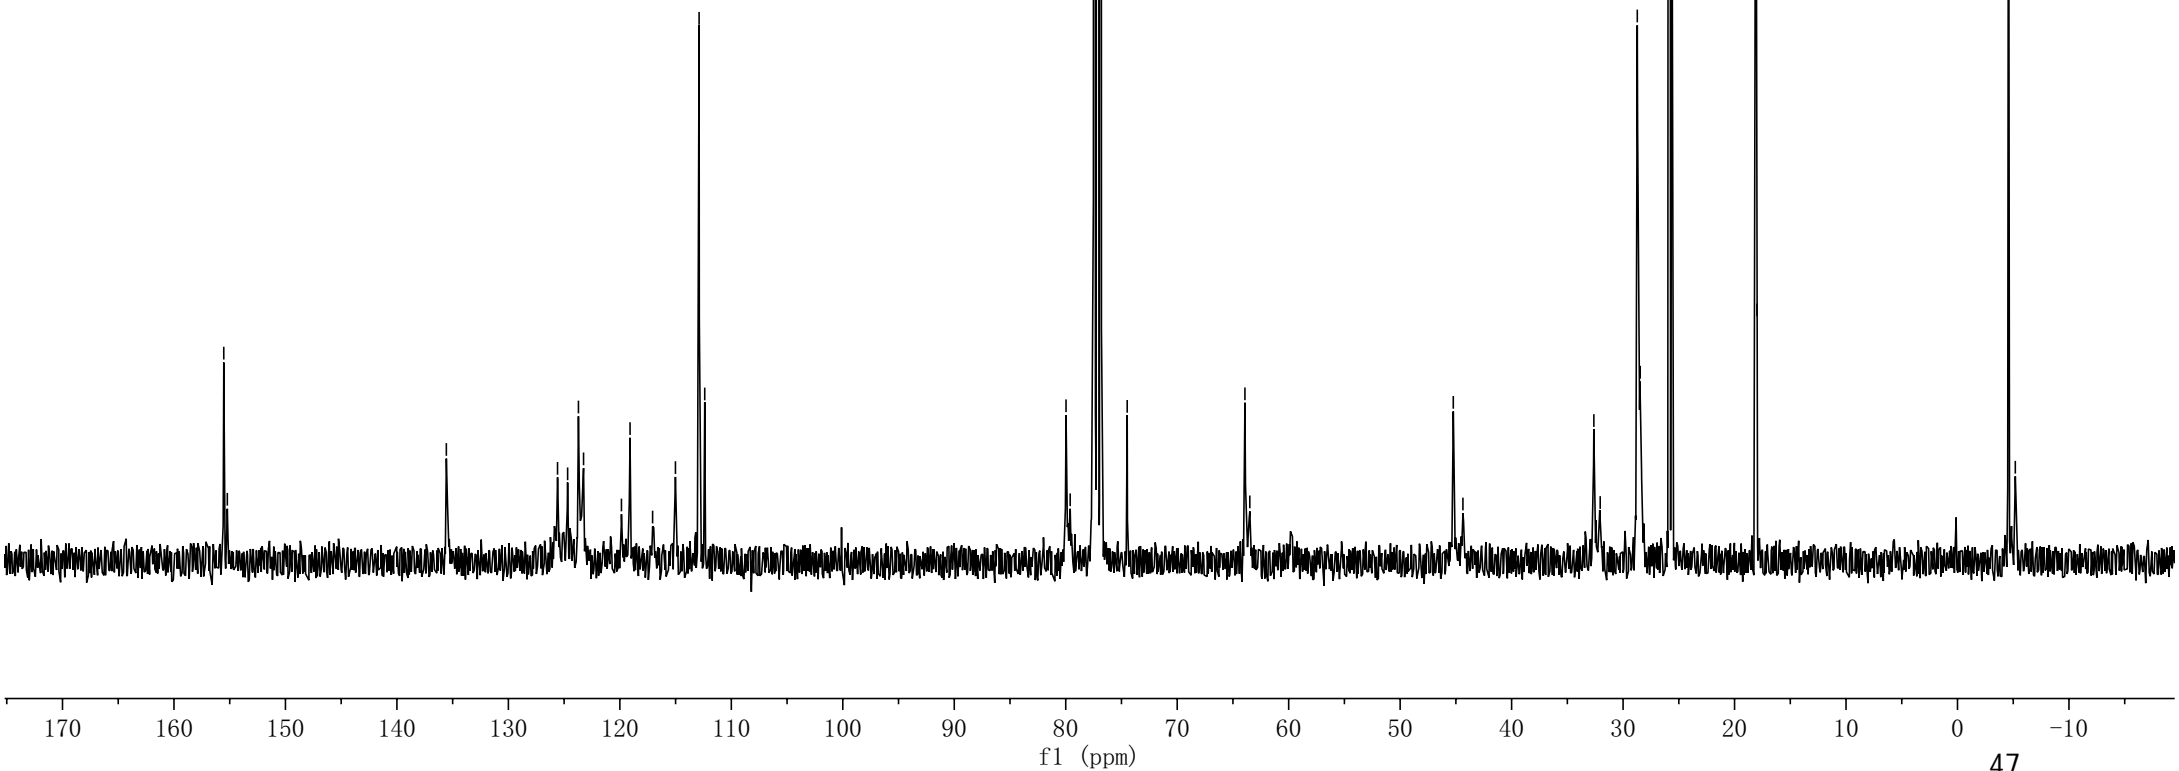

7.753  
7.668

7.163  
7.101  
7.080  
6.932  
6.913  
6.863  
6.843

4.982  
4.697  
4.436  
4.427  
4.418  
4.338  
4.238  
3.832  
3.734  
3.718  
3.700  
3.674

2.424  
2.386  
2.363  
2.201  
2.141  
2.074  
2.053  
2.033  
1.886

1.470  
1.361  
1.312  
1.283  
1.256  
1.073  
0.957  
0.879  
0.717  
0.633

0.099  
0.060  
0.027  
-0.065  
-0.106

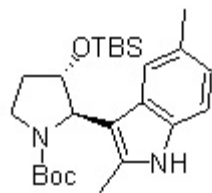

8v (<sup>1</sup>H NMR, 400MHz, CDCl<sub>3</sub>)

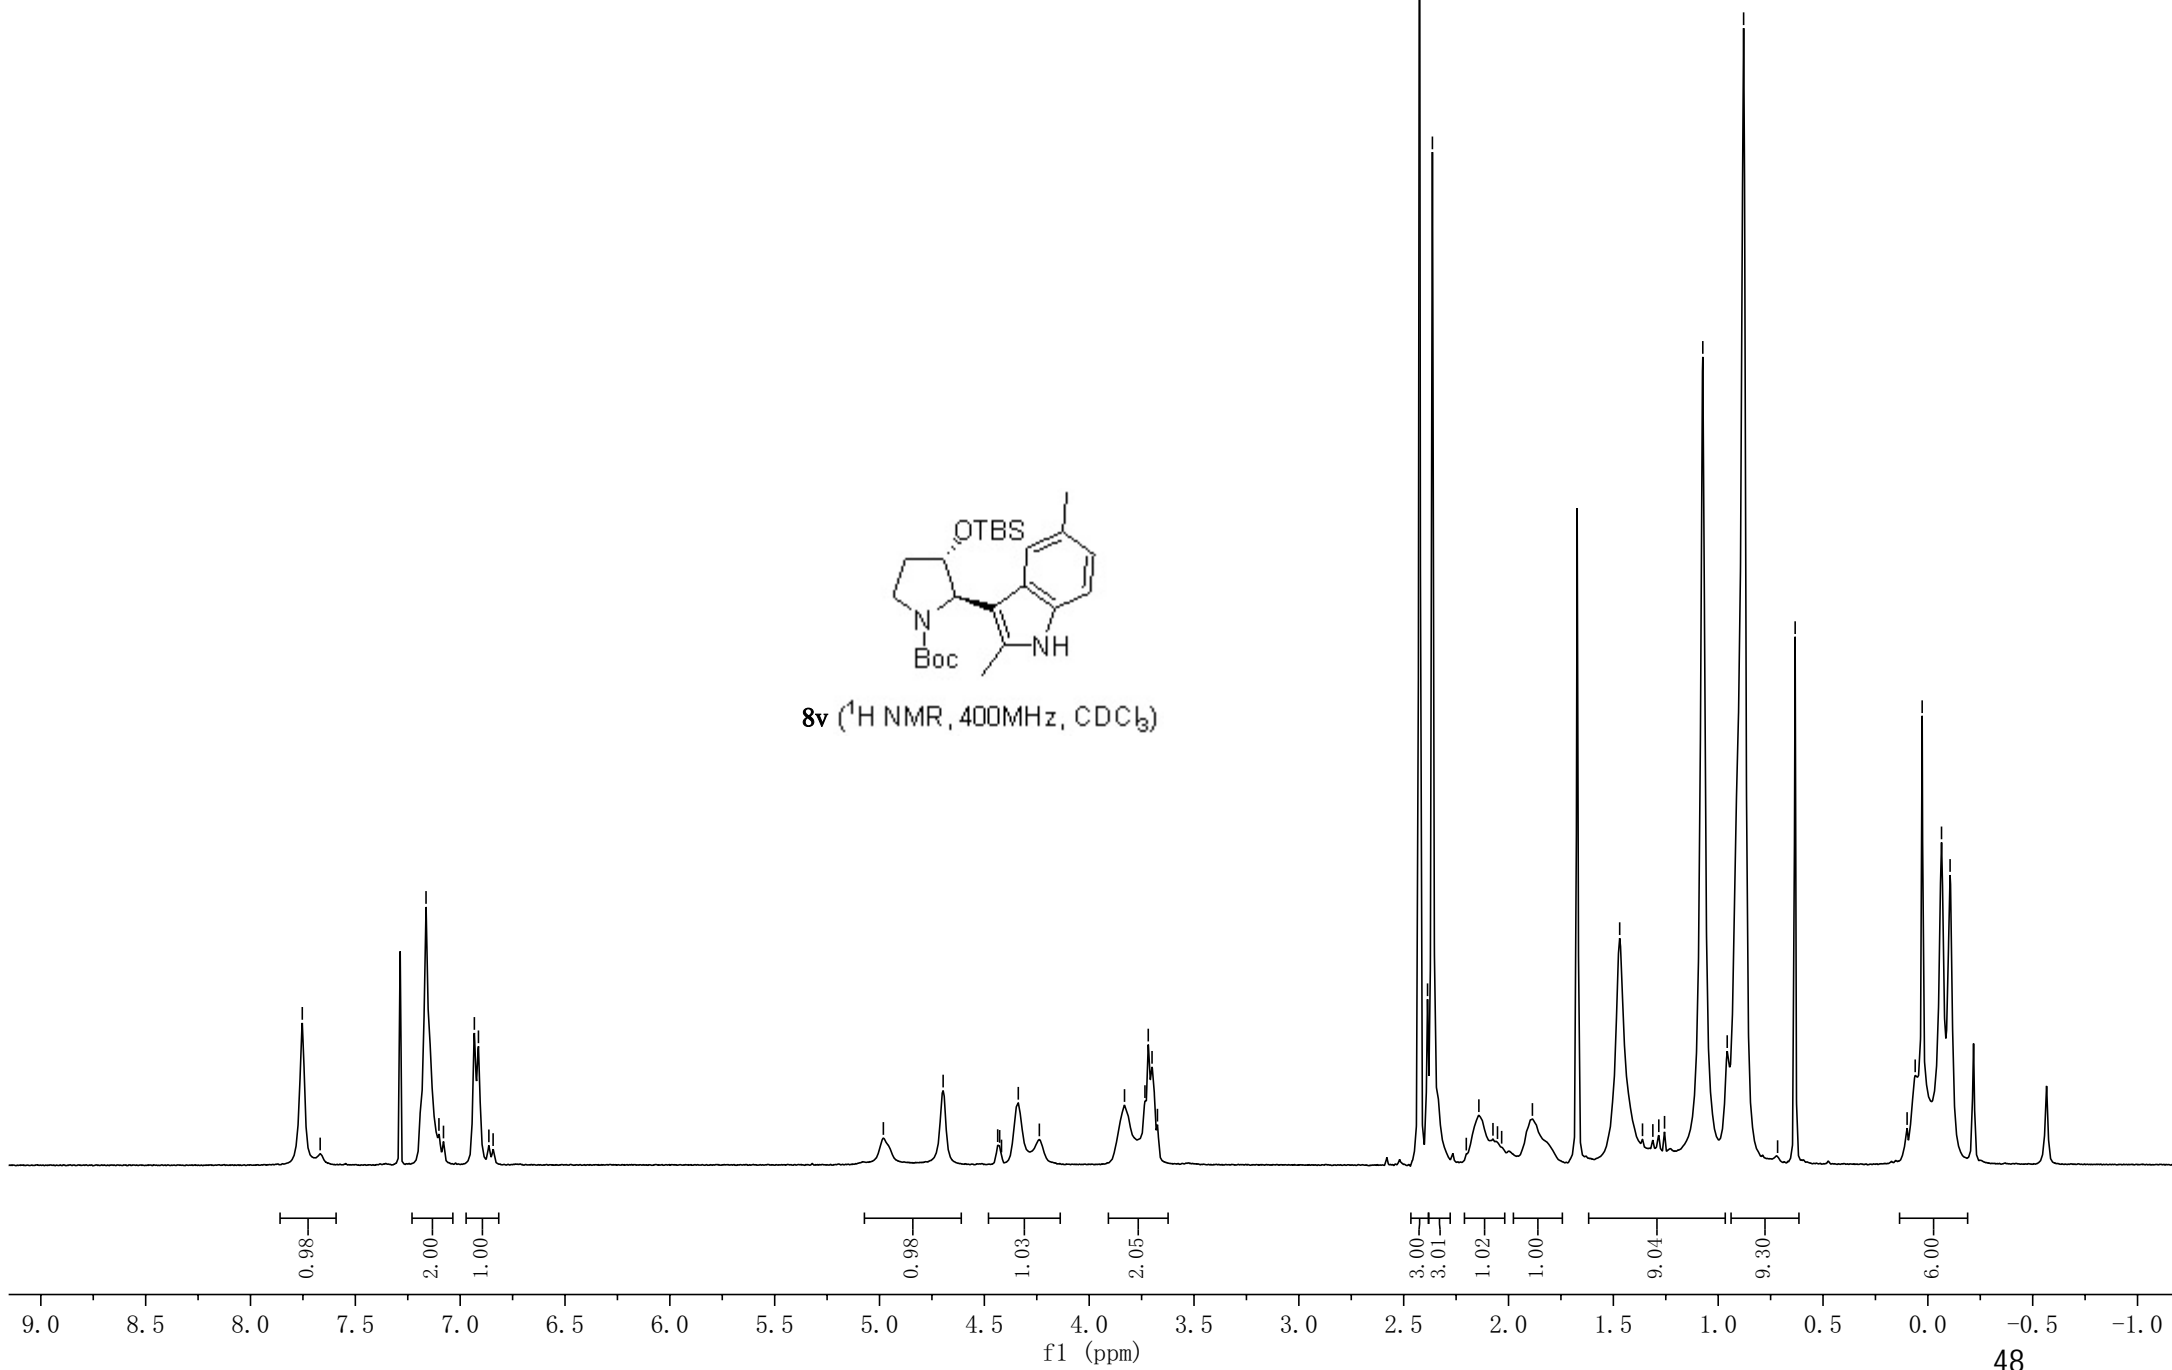



— 155.136

— 133.582

— 131.189

— 128.191

— 127.049

— 122.179

— 118.029

— 111.168

— 109.826

— 78.732

— 78.151

— 62.854

— 44.650

— 32.989

— 29.704

— 28.123

— 25.721

— 25.563

— 21.636

— 17.914

— 12.052

— 4.910

— 5.646

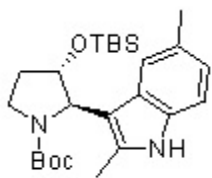

8v (<sup>13</sup>C NMR, 100MHz, CDCl<sub>3</sub>)

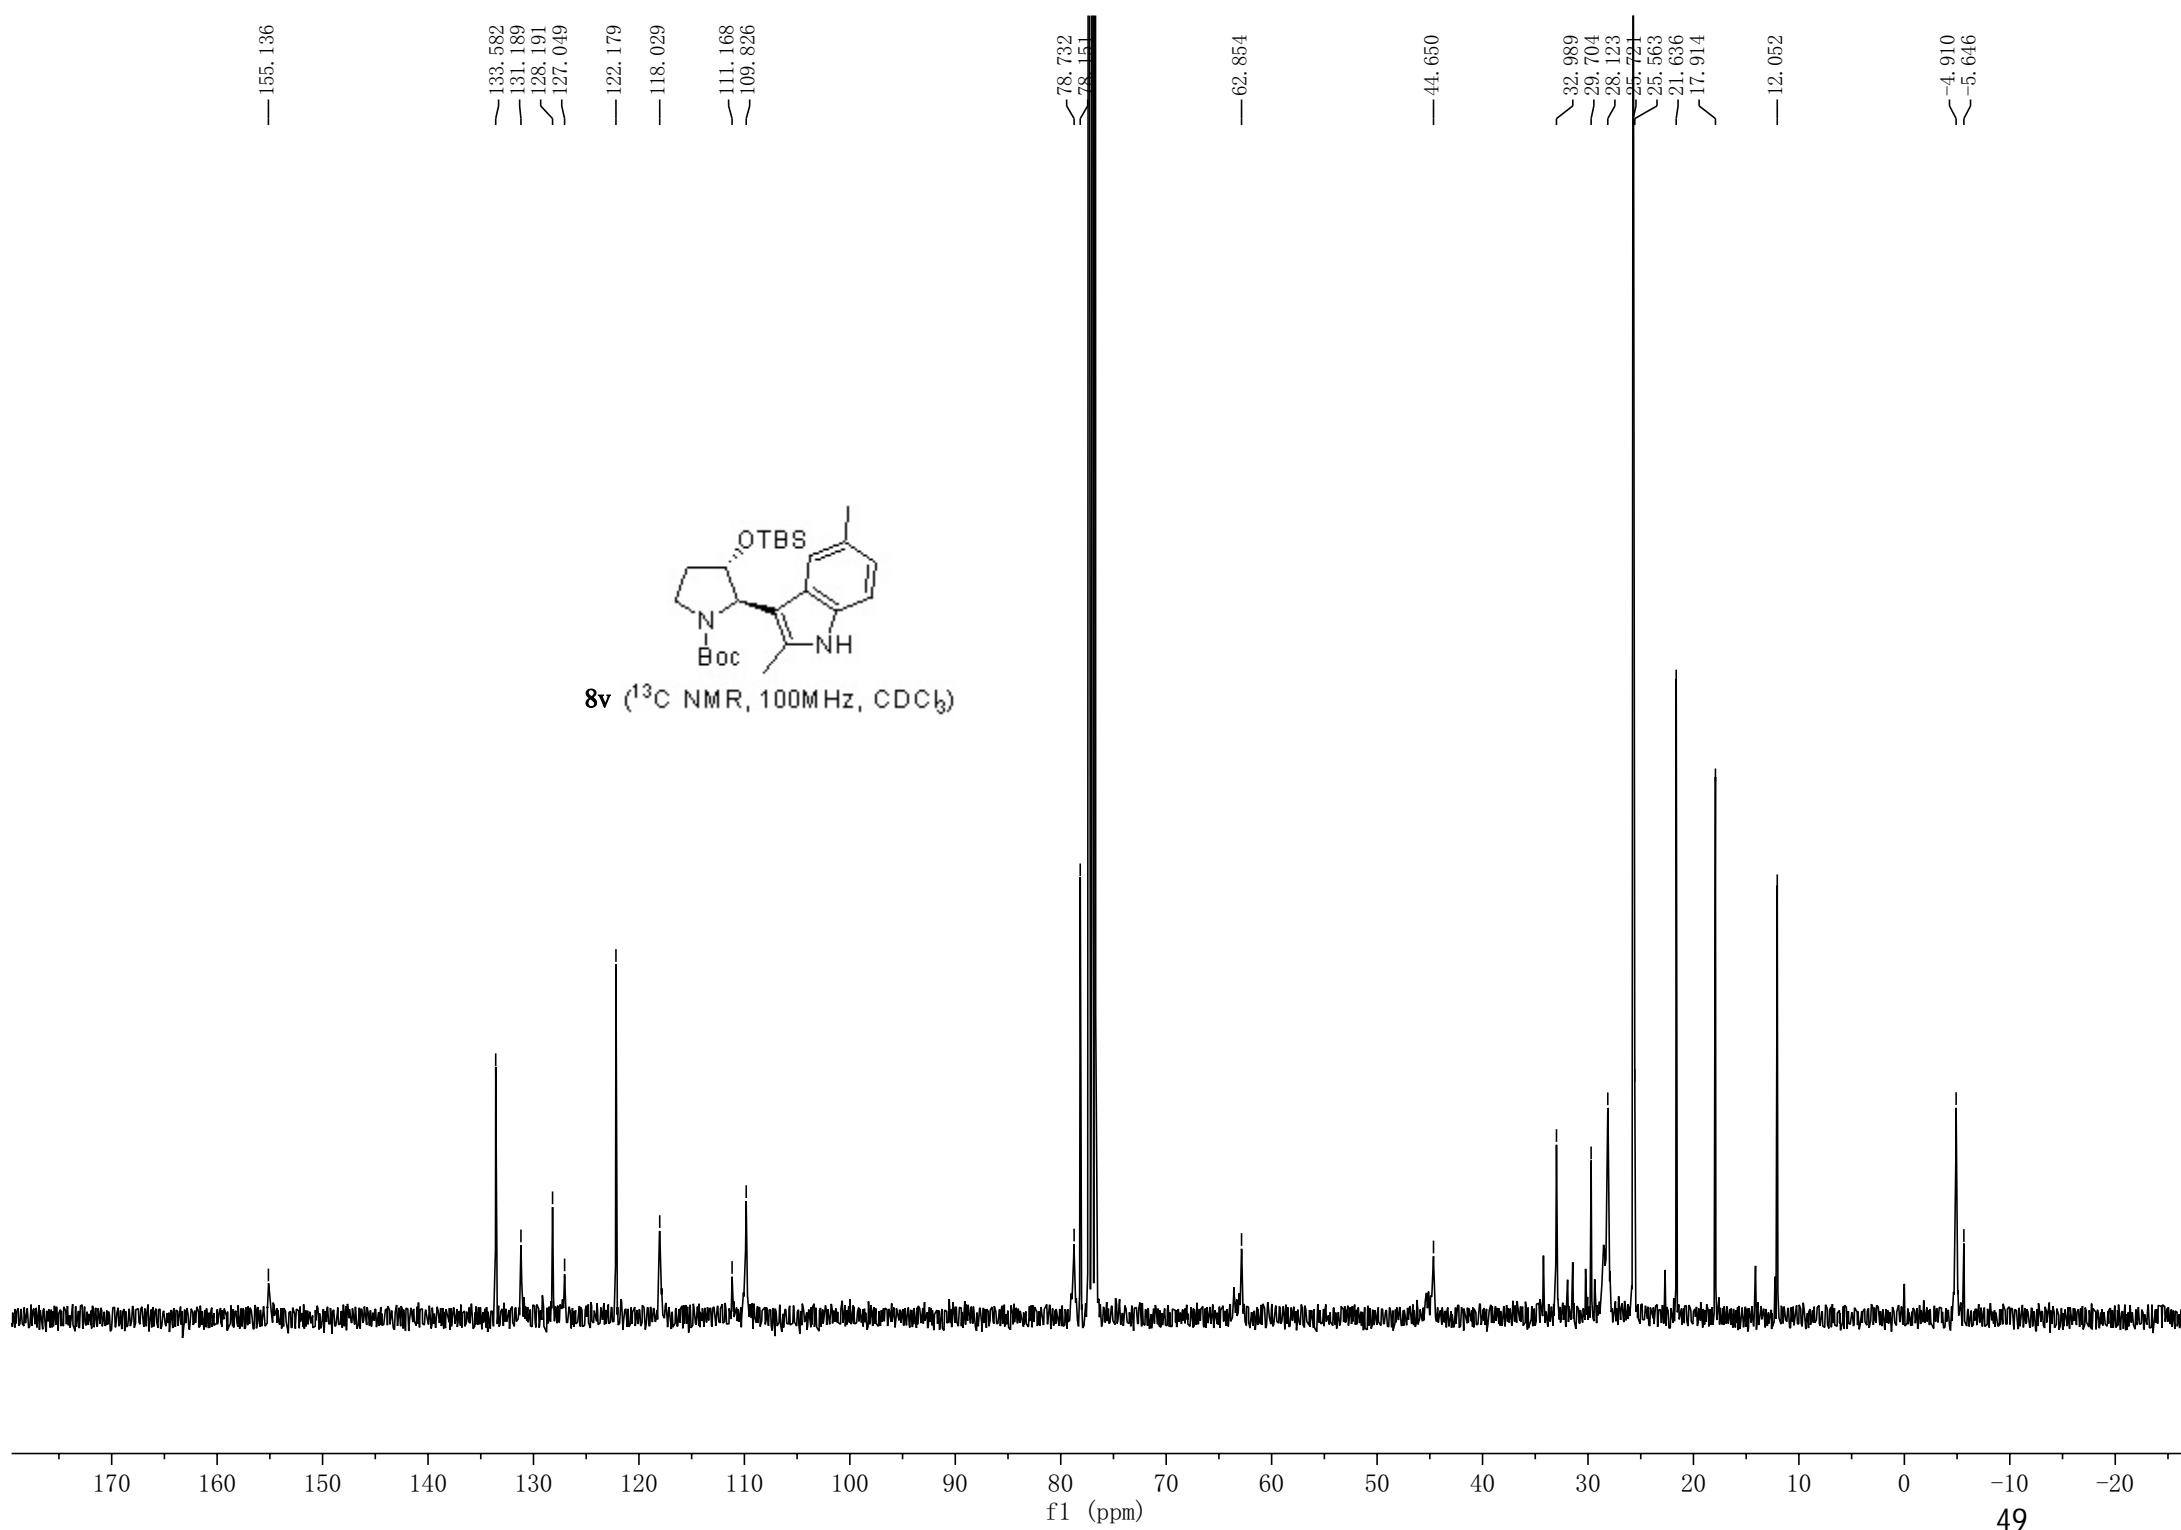

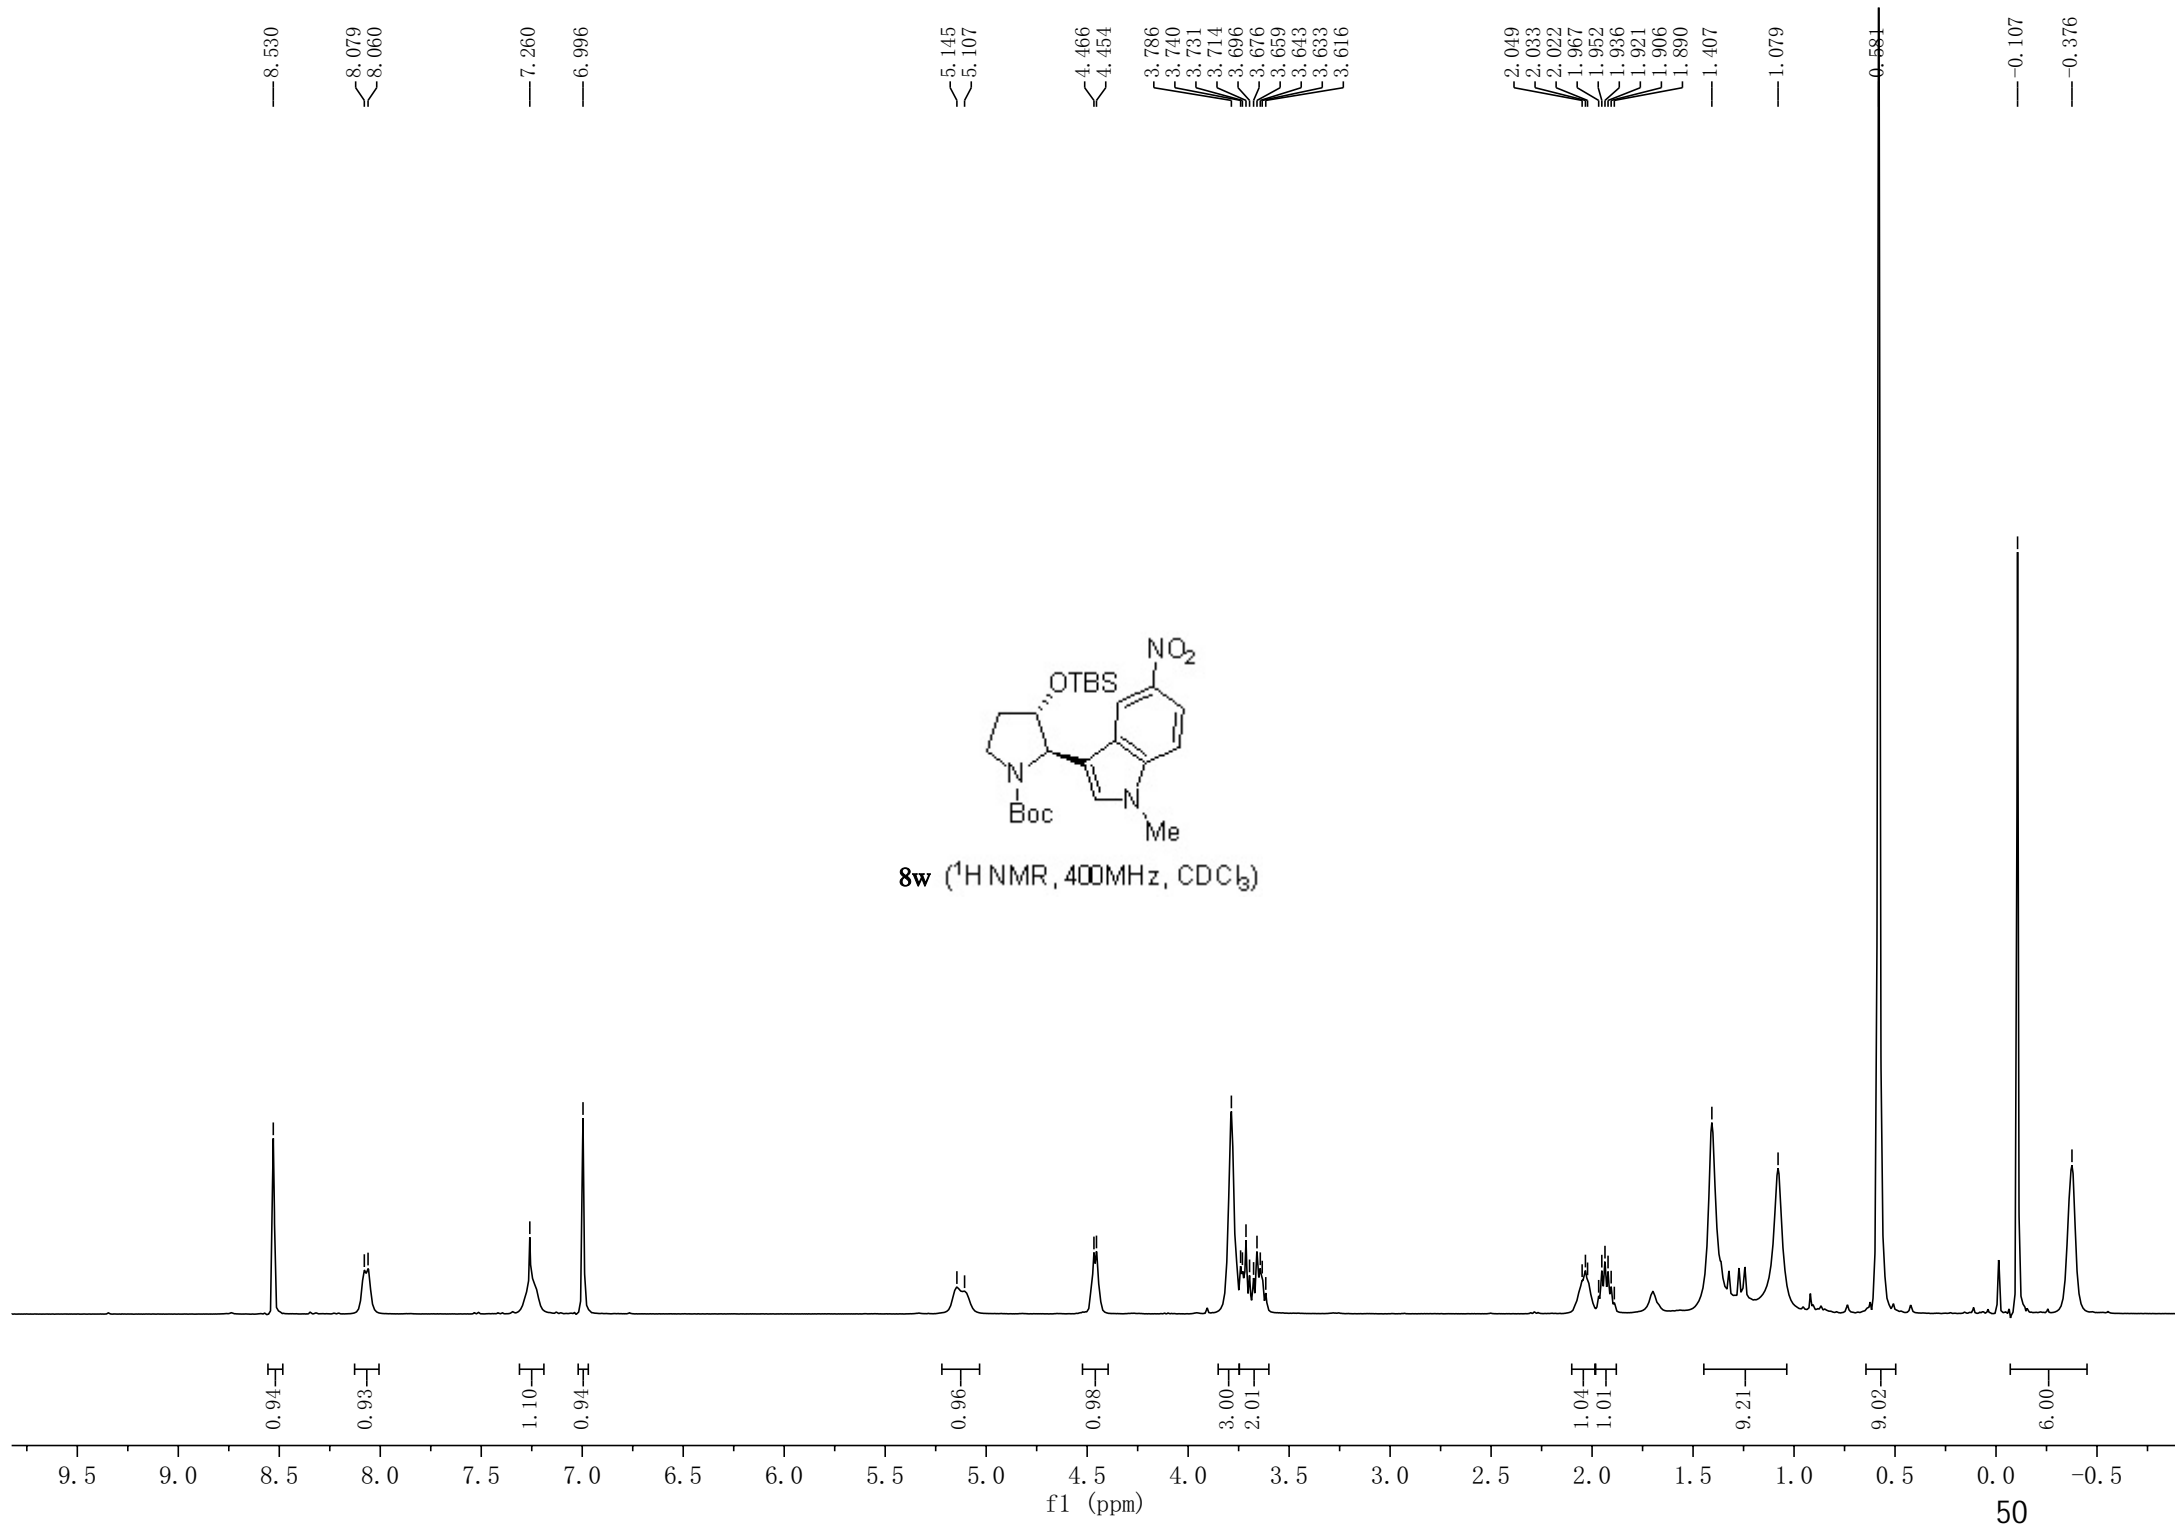

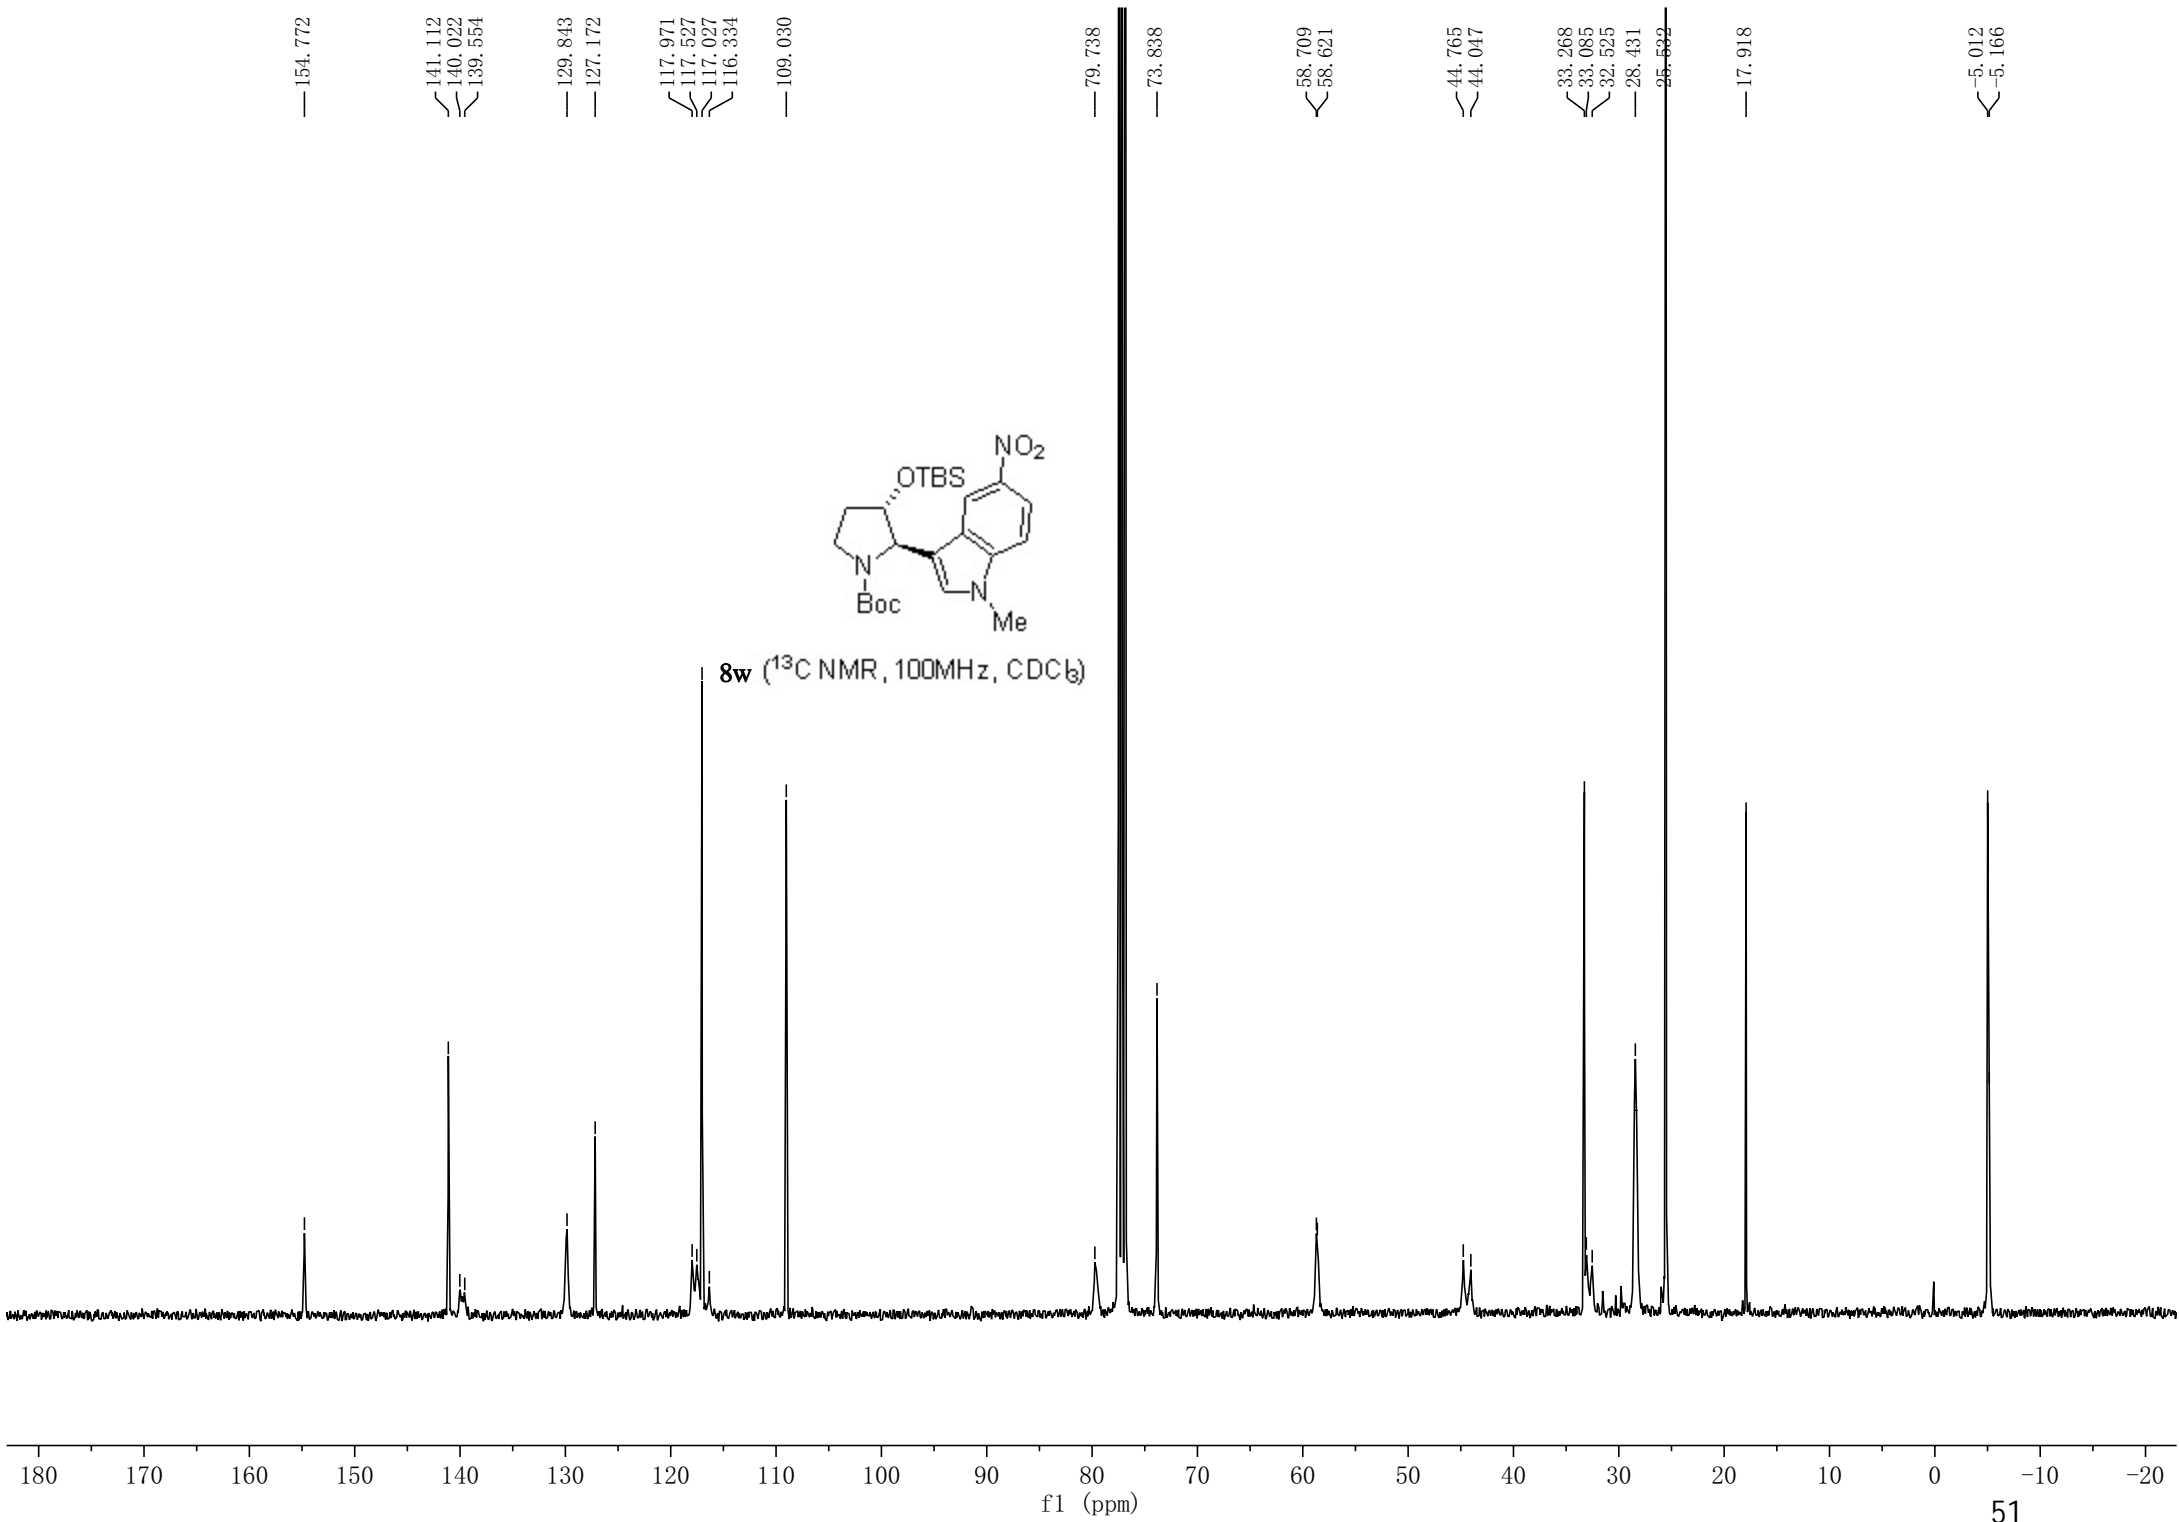

8.226  
8.194  
8.109  
8.001  
7.592  
7.573  
7.388  
7.362  
7.332  
7.311  
7.289  
7.256  
7.238  
7.220  
7.200  
7.158  
7.138  
7.111  
6.967  
6.950  
6.830  
6.800

5.293  
5.232  
5.201  
5.184  
5.149  
5.105  
5.060

4.376

3.815  
3.801  
3.794  
3.772  
3.750  
3.725

2.114  
2.089  
2.057  
1.814  
1.799  
1.782  
1.768

0.013

0.132  
0.074  
0.007  
-0.122

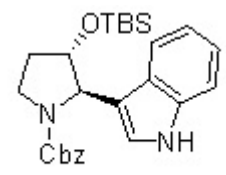

8x (<sup>1</sup>H NMR, 400MHz, CDCl<sub>3</sub>)

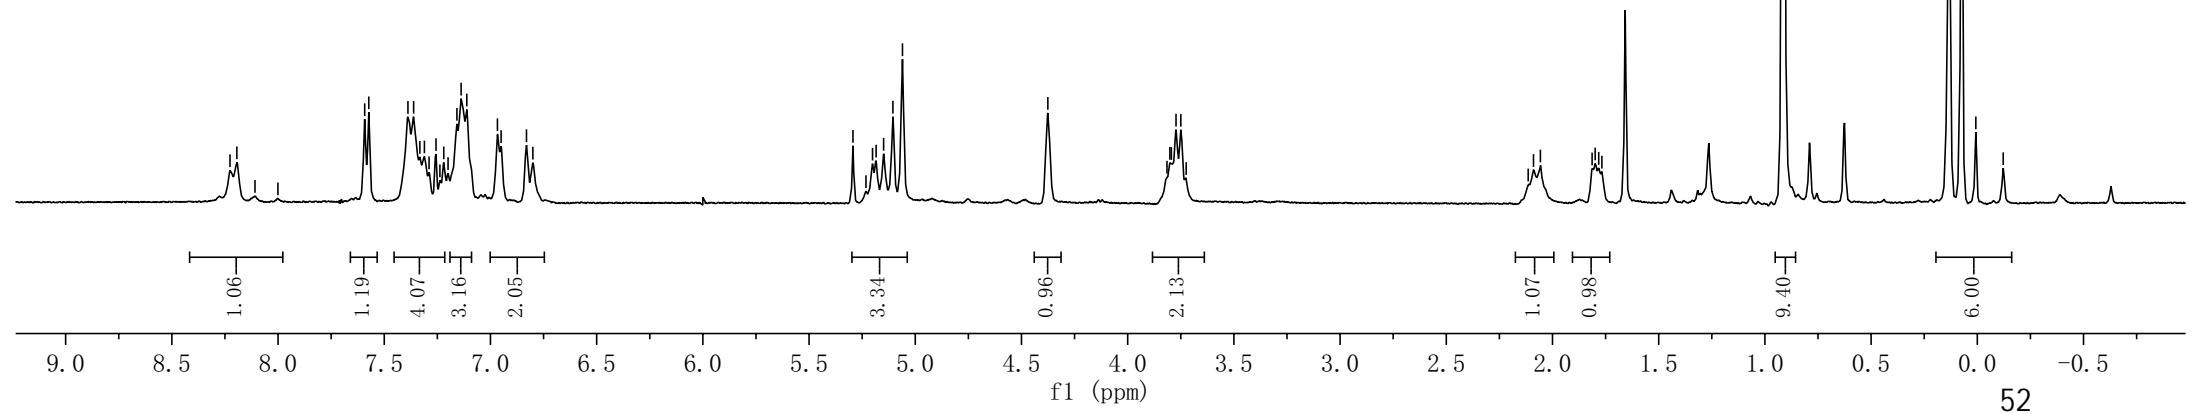

155.823  
155.474  
137.333  
137.211  
136.957  
136.744  
128.609  
128.233  
128.141  
127.935  
127.753  
127.461  
127.120  
125.602  
122.243  
122.103  
121.624  
121.503  
119.747  
119.626  
119.280  
119.246  
118.803  
116.718  
115.763  
111.556  
111.310  
111.022

66.797  
66.453  
64.704  
64.103

44.928  
44.820

32.534  
31.645  
30.284  
29.826  
26.083  
25.892  
25.702

18.092  
18.020

-4.466  
-4.533

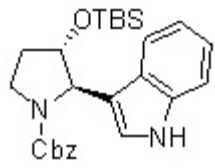

8x (<sup>13</sup>C NMR, 100MHz, CDCl<sub>3</sub>)

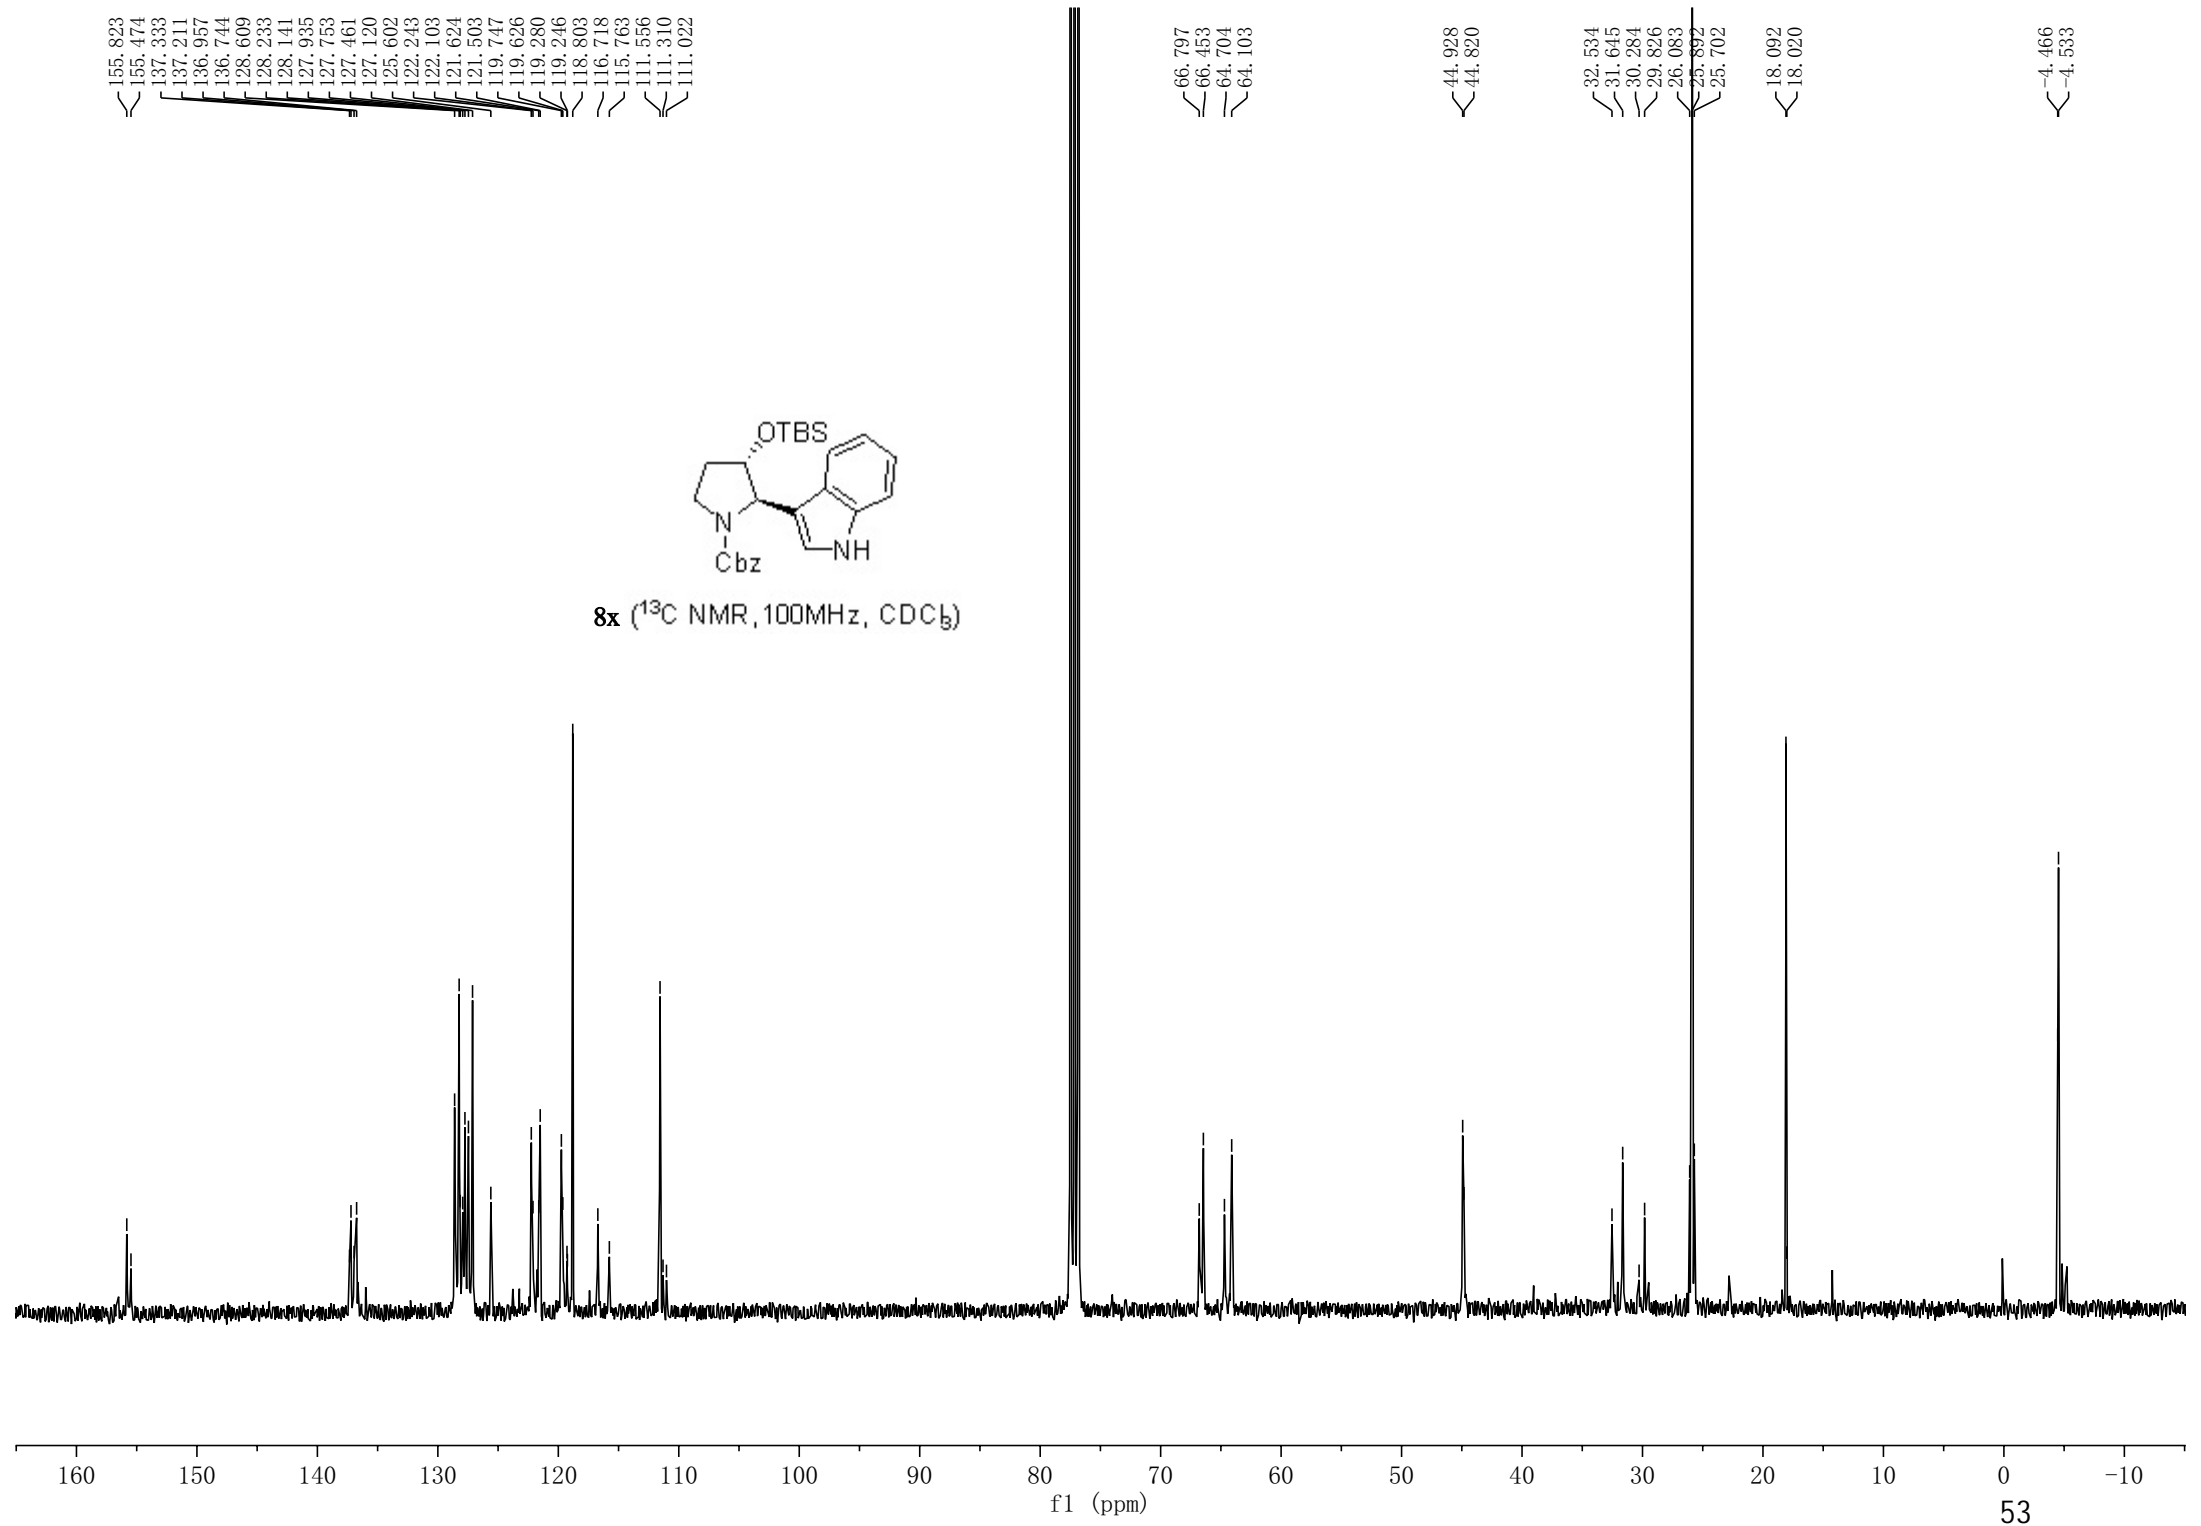

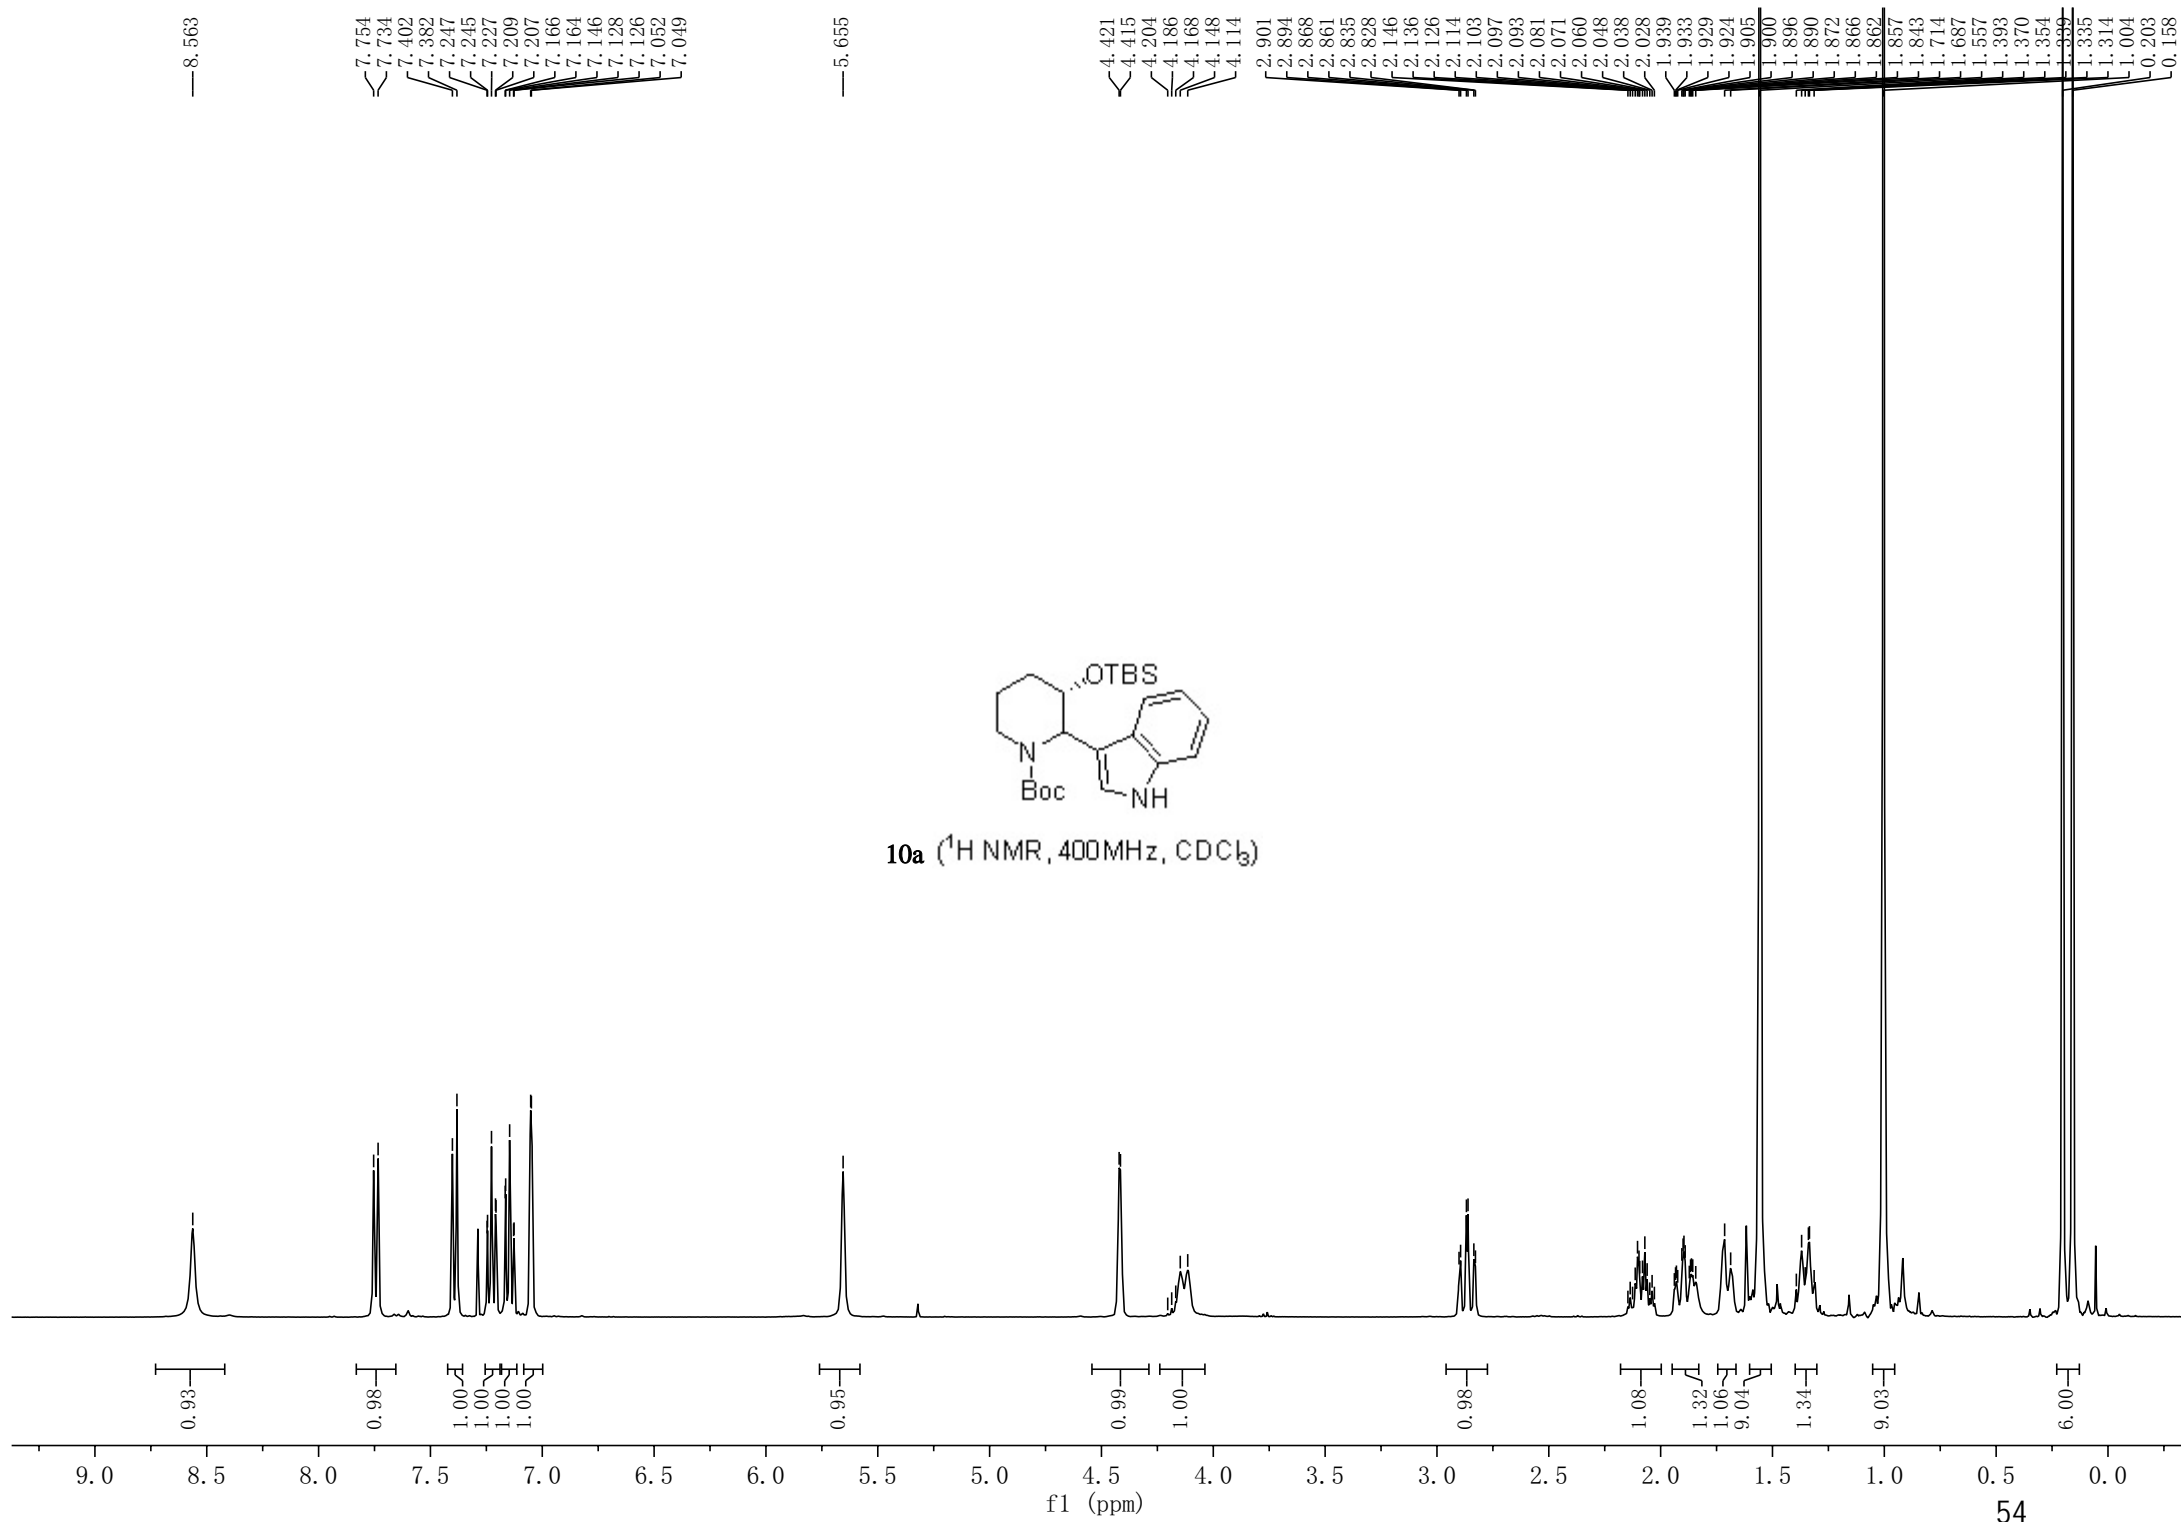

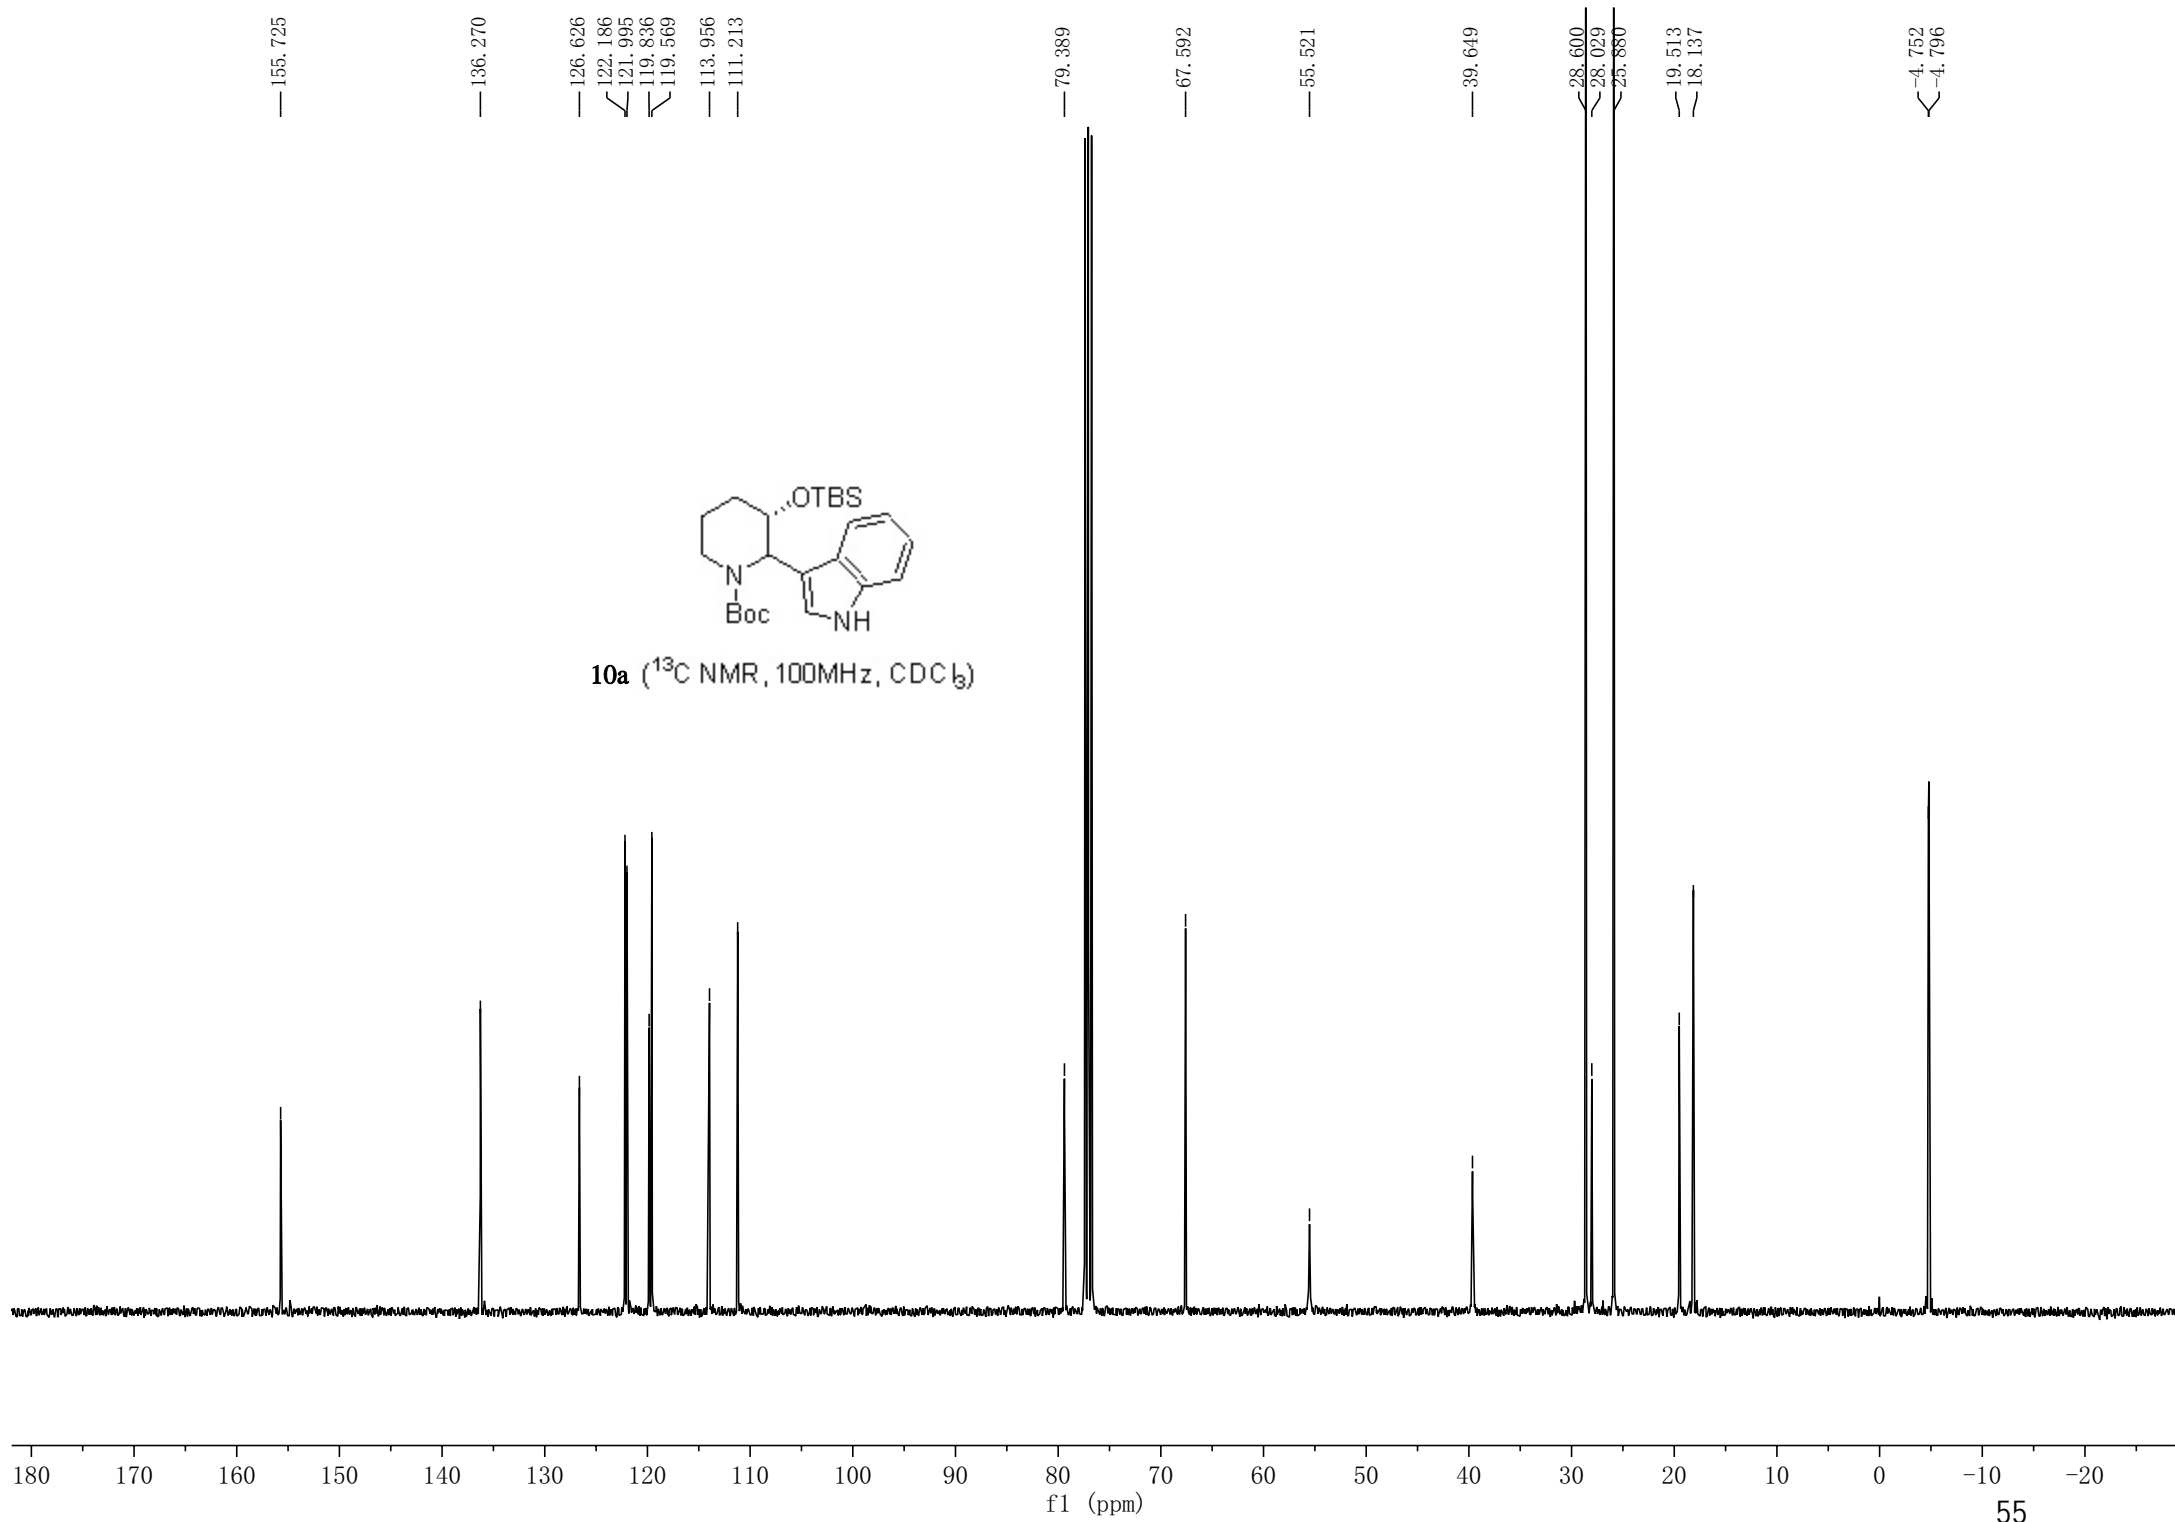

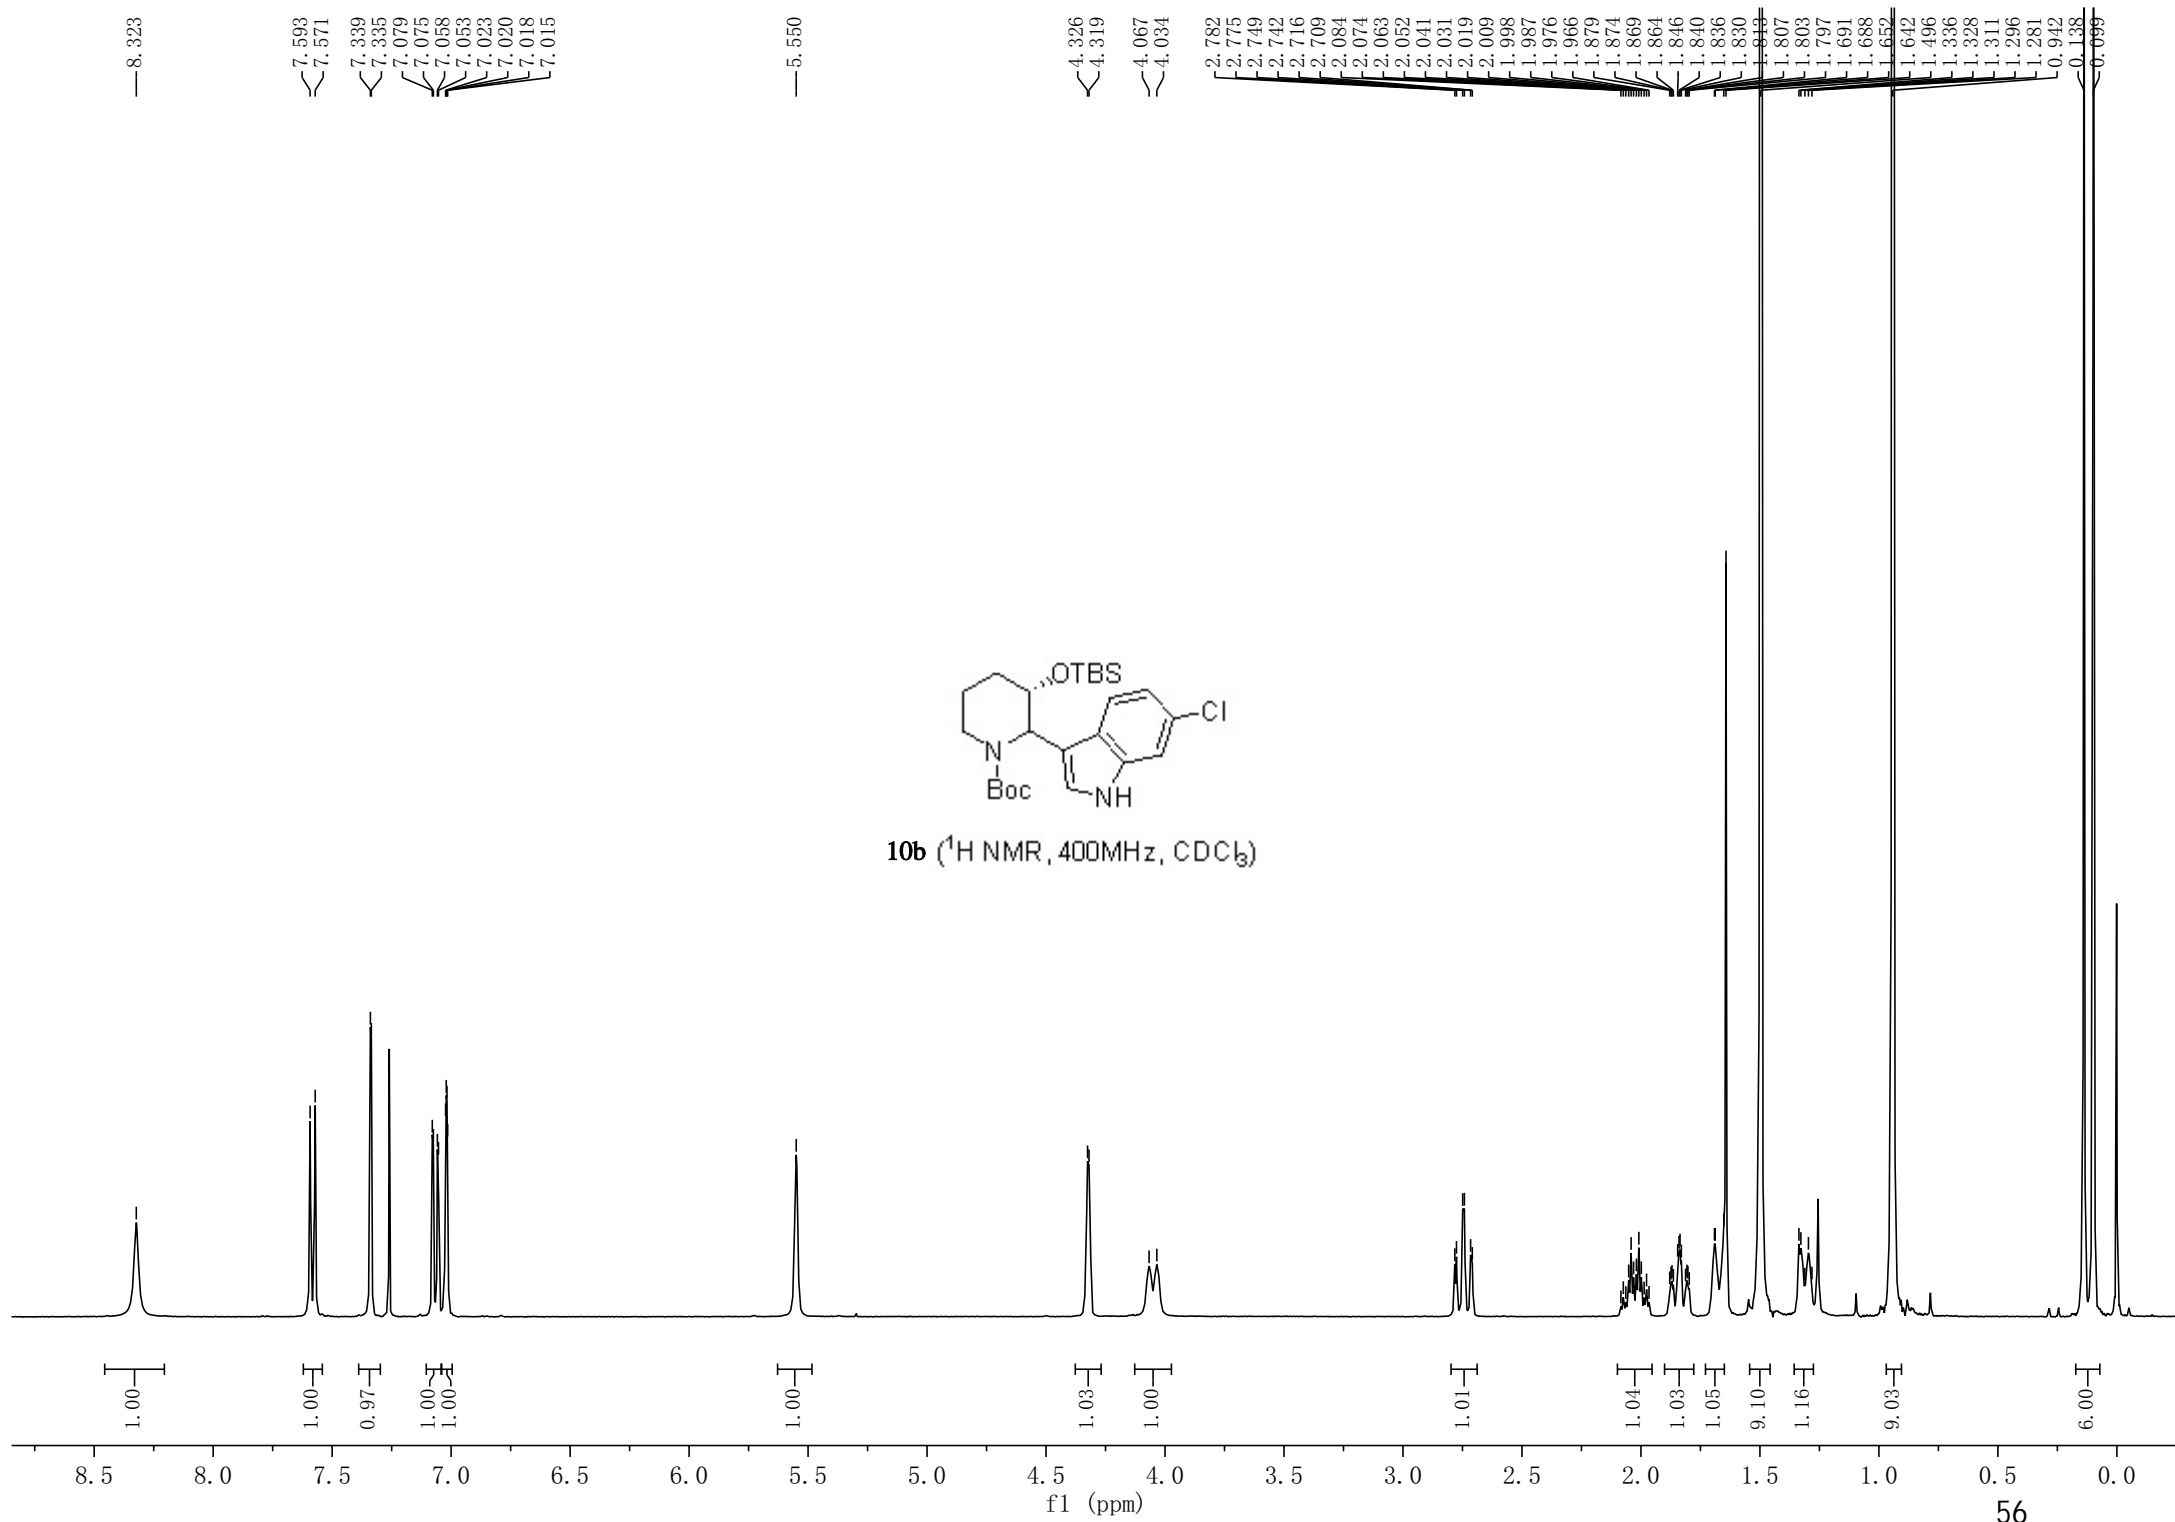



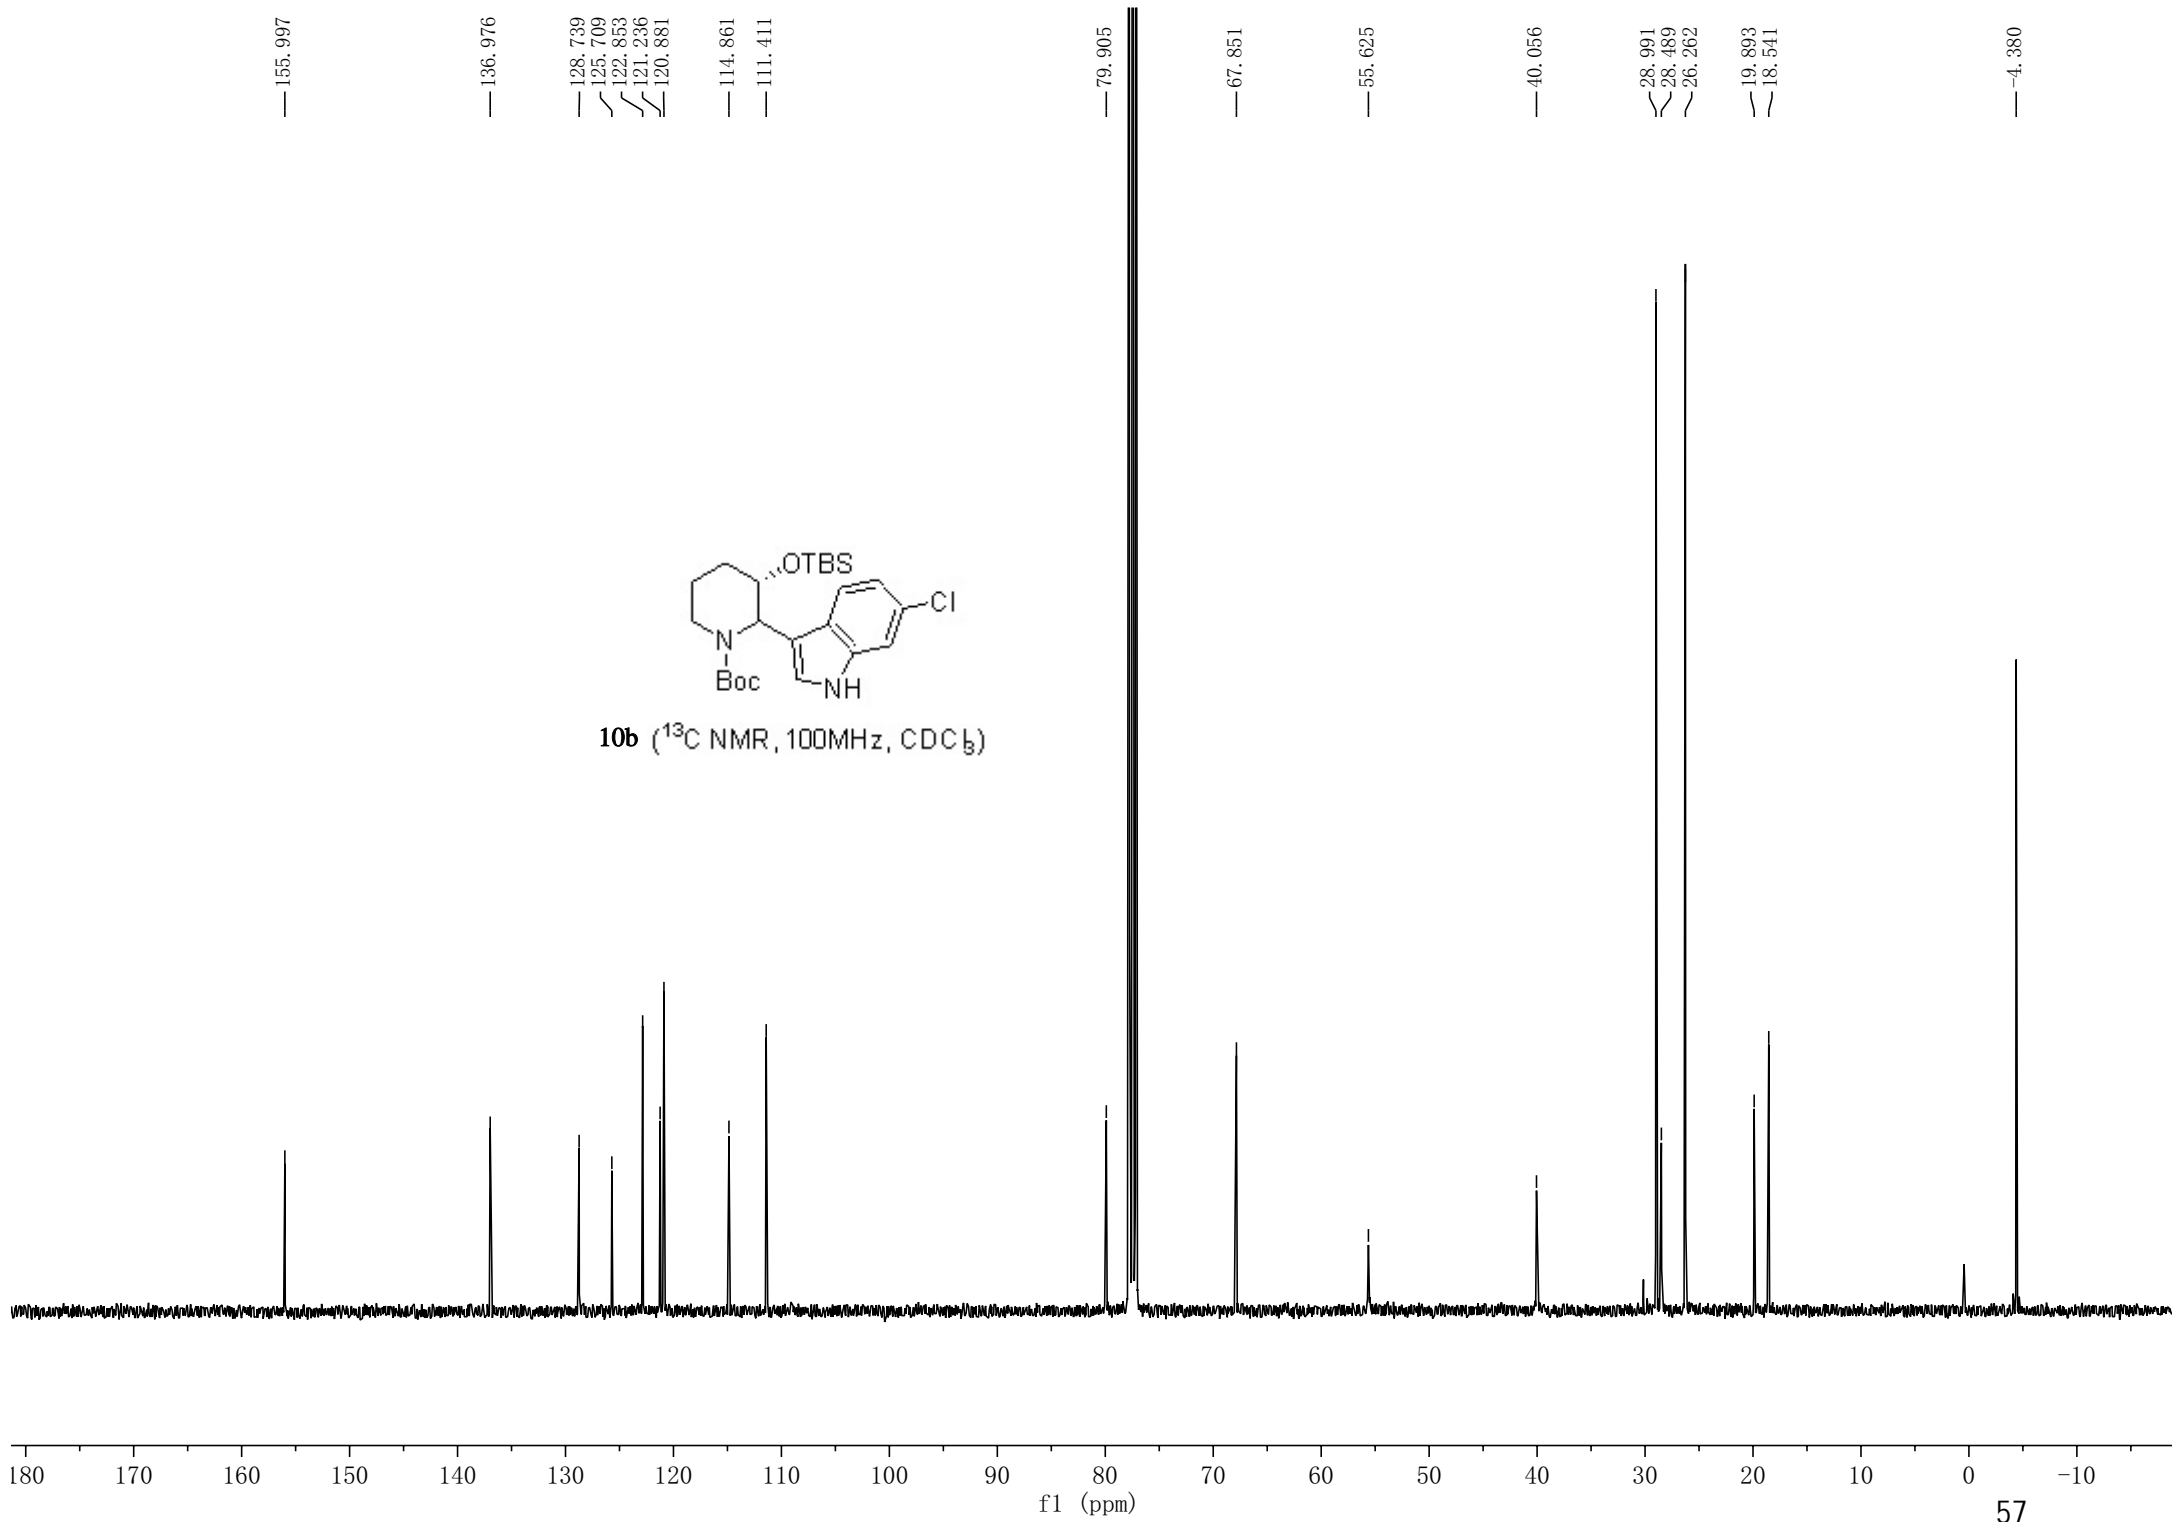

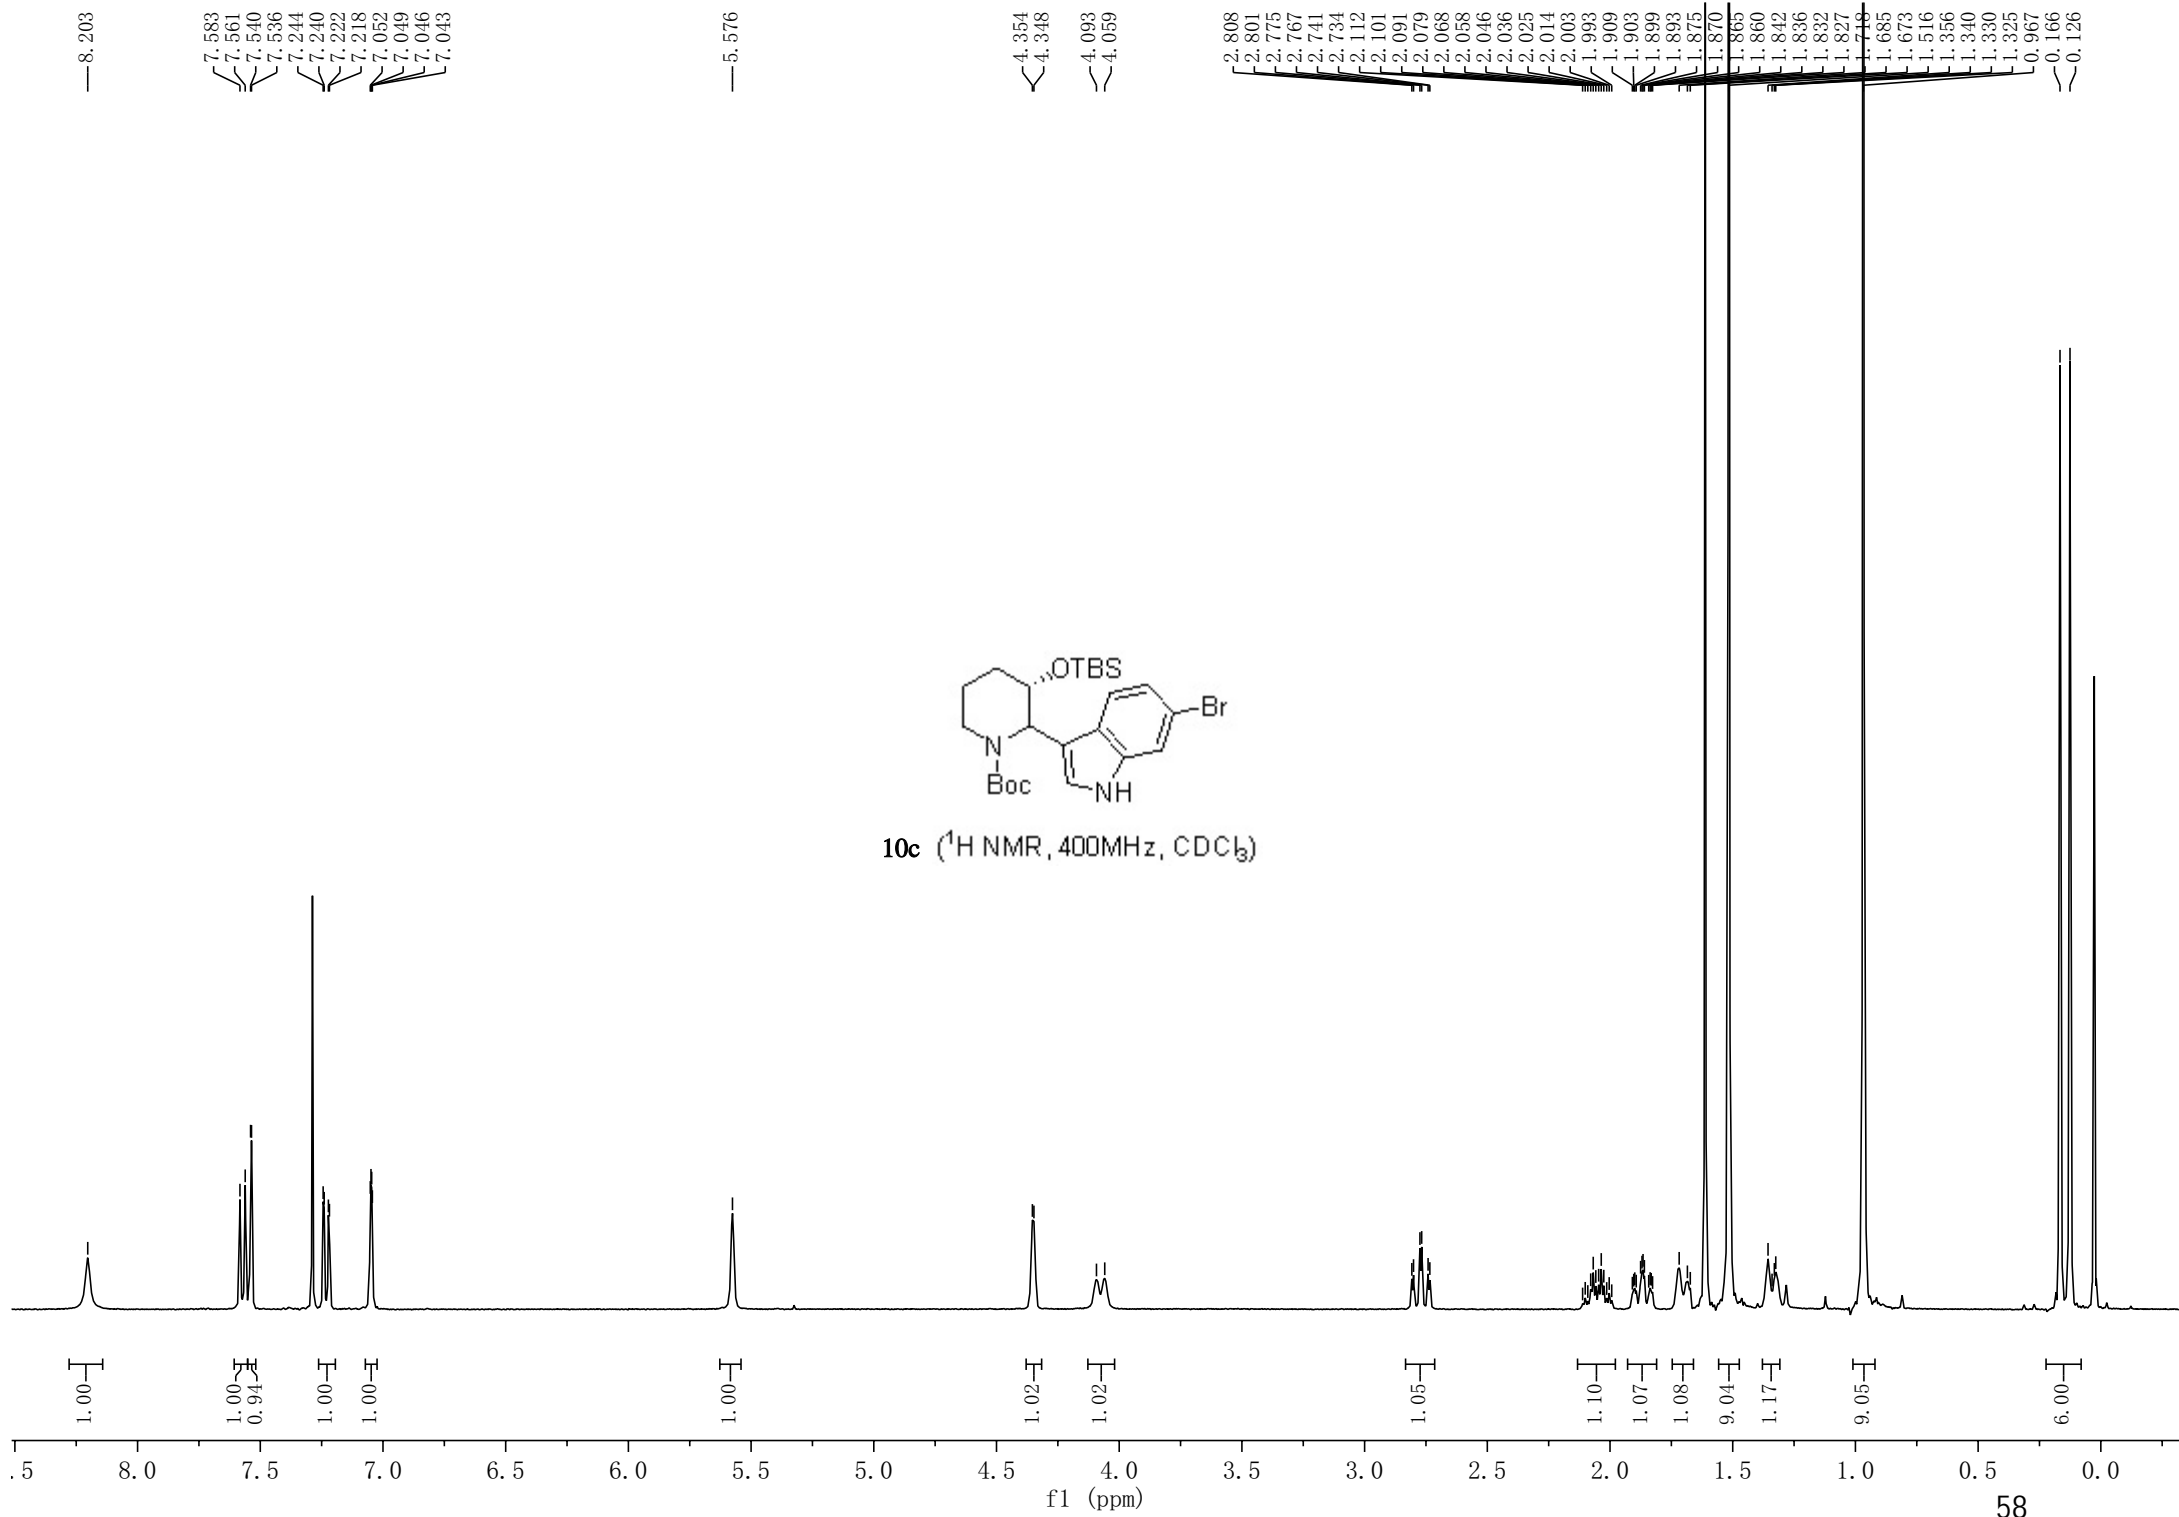

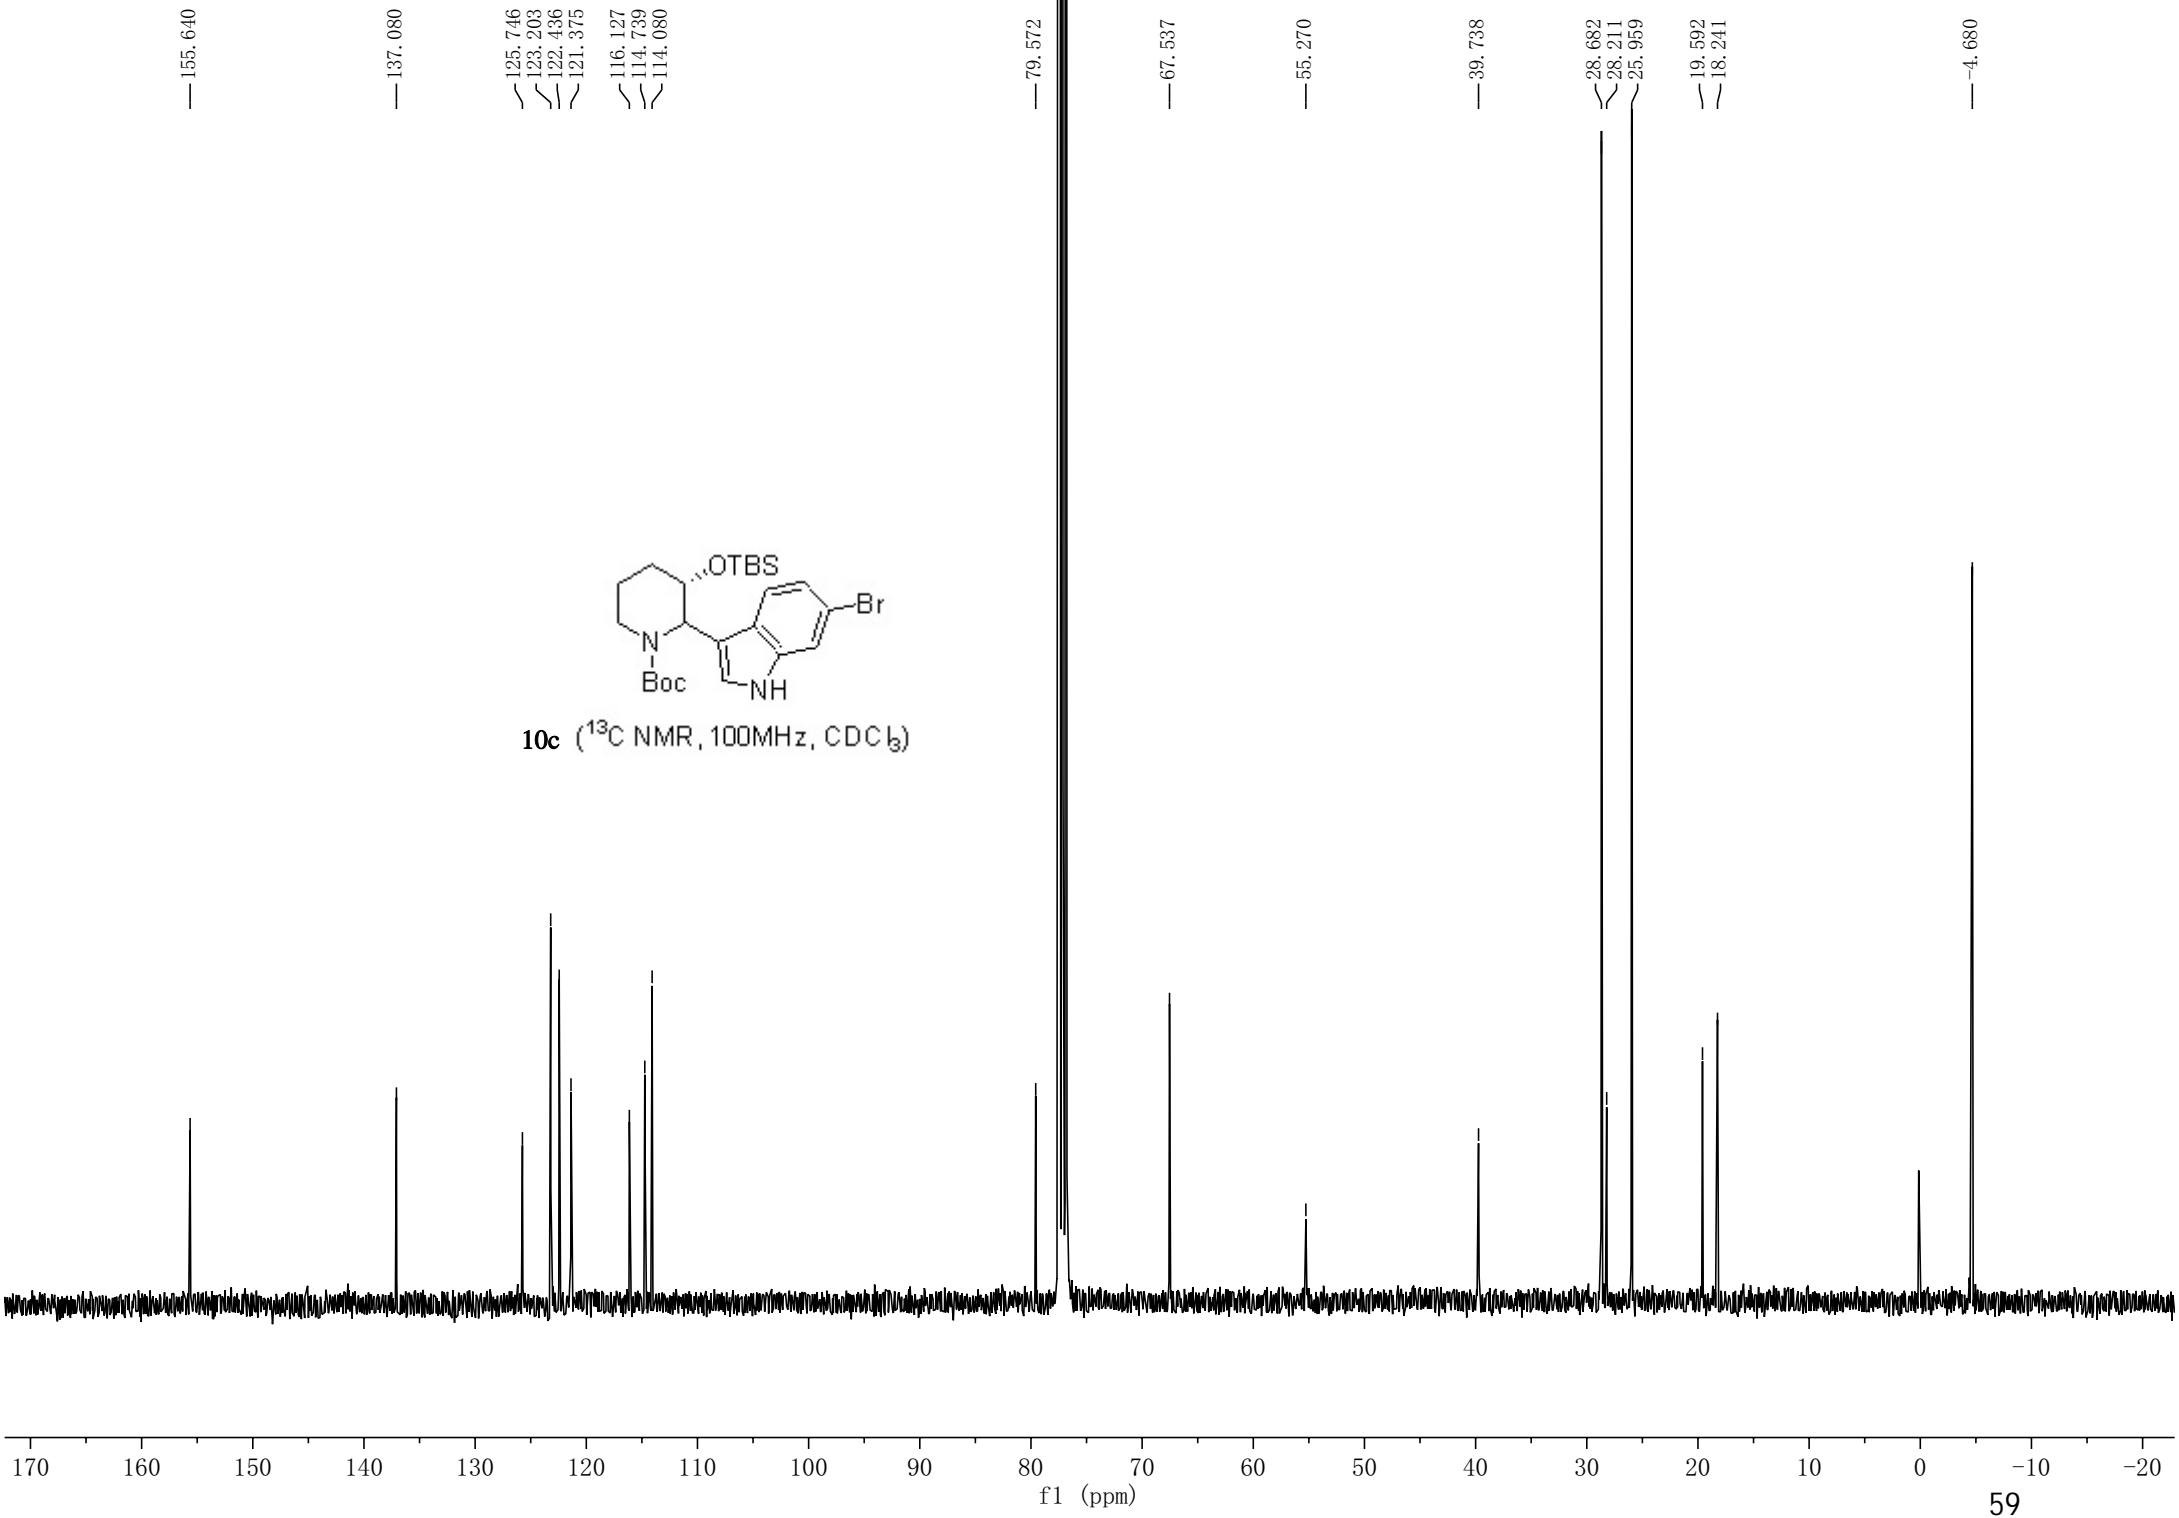

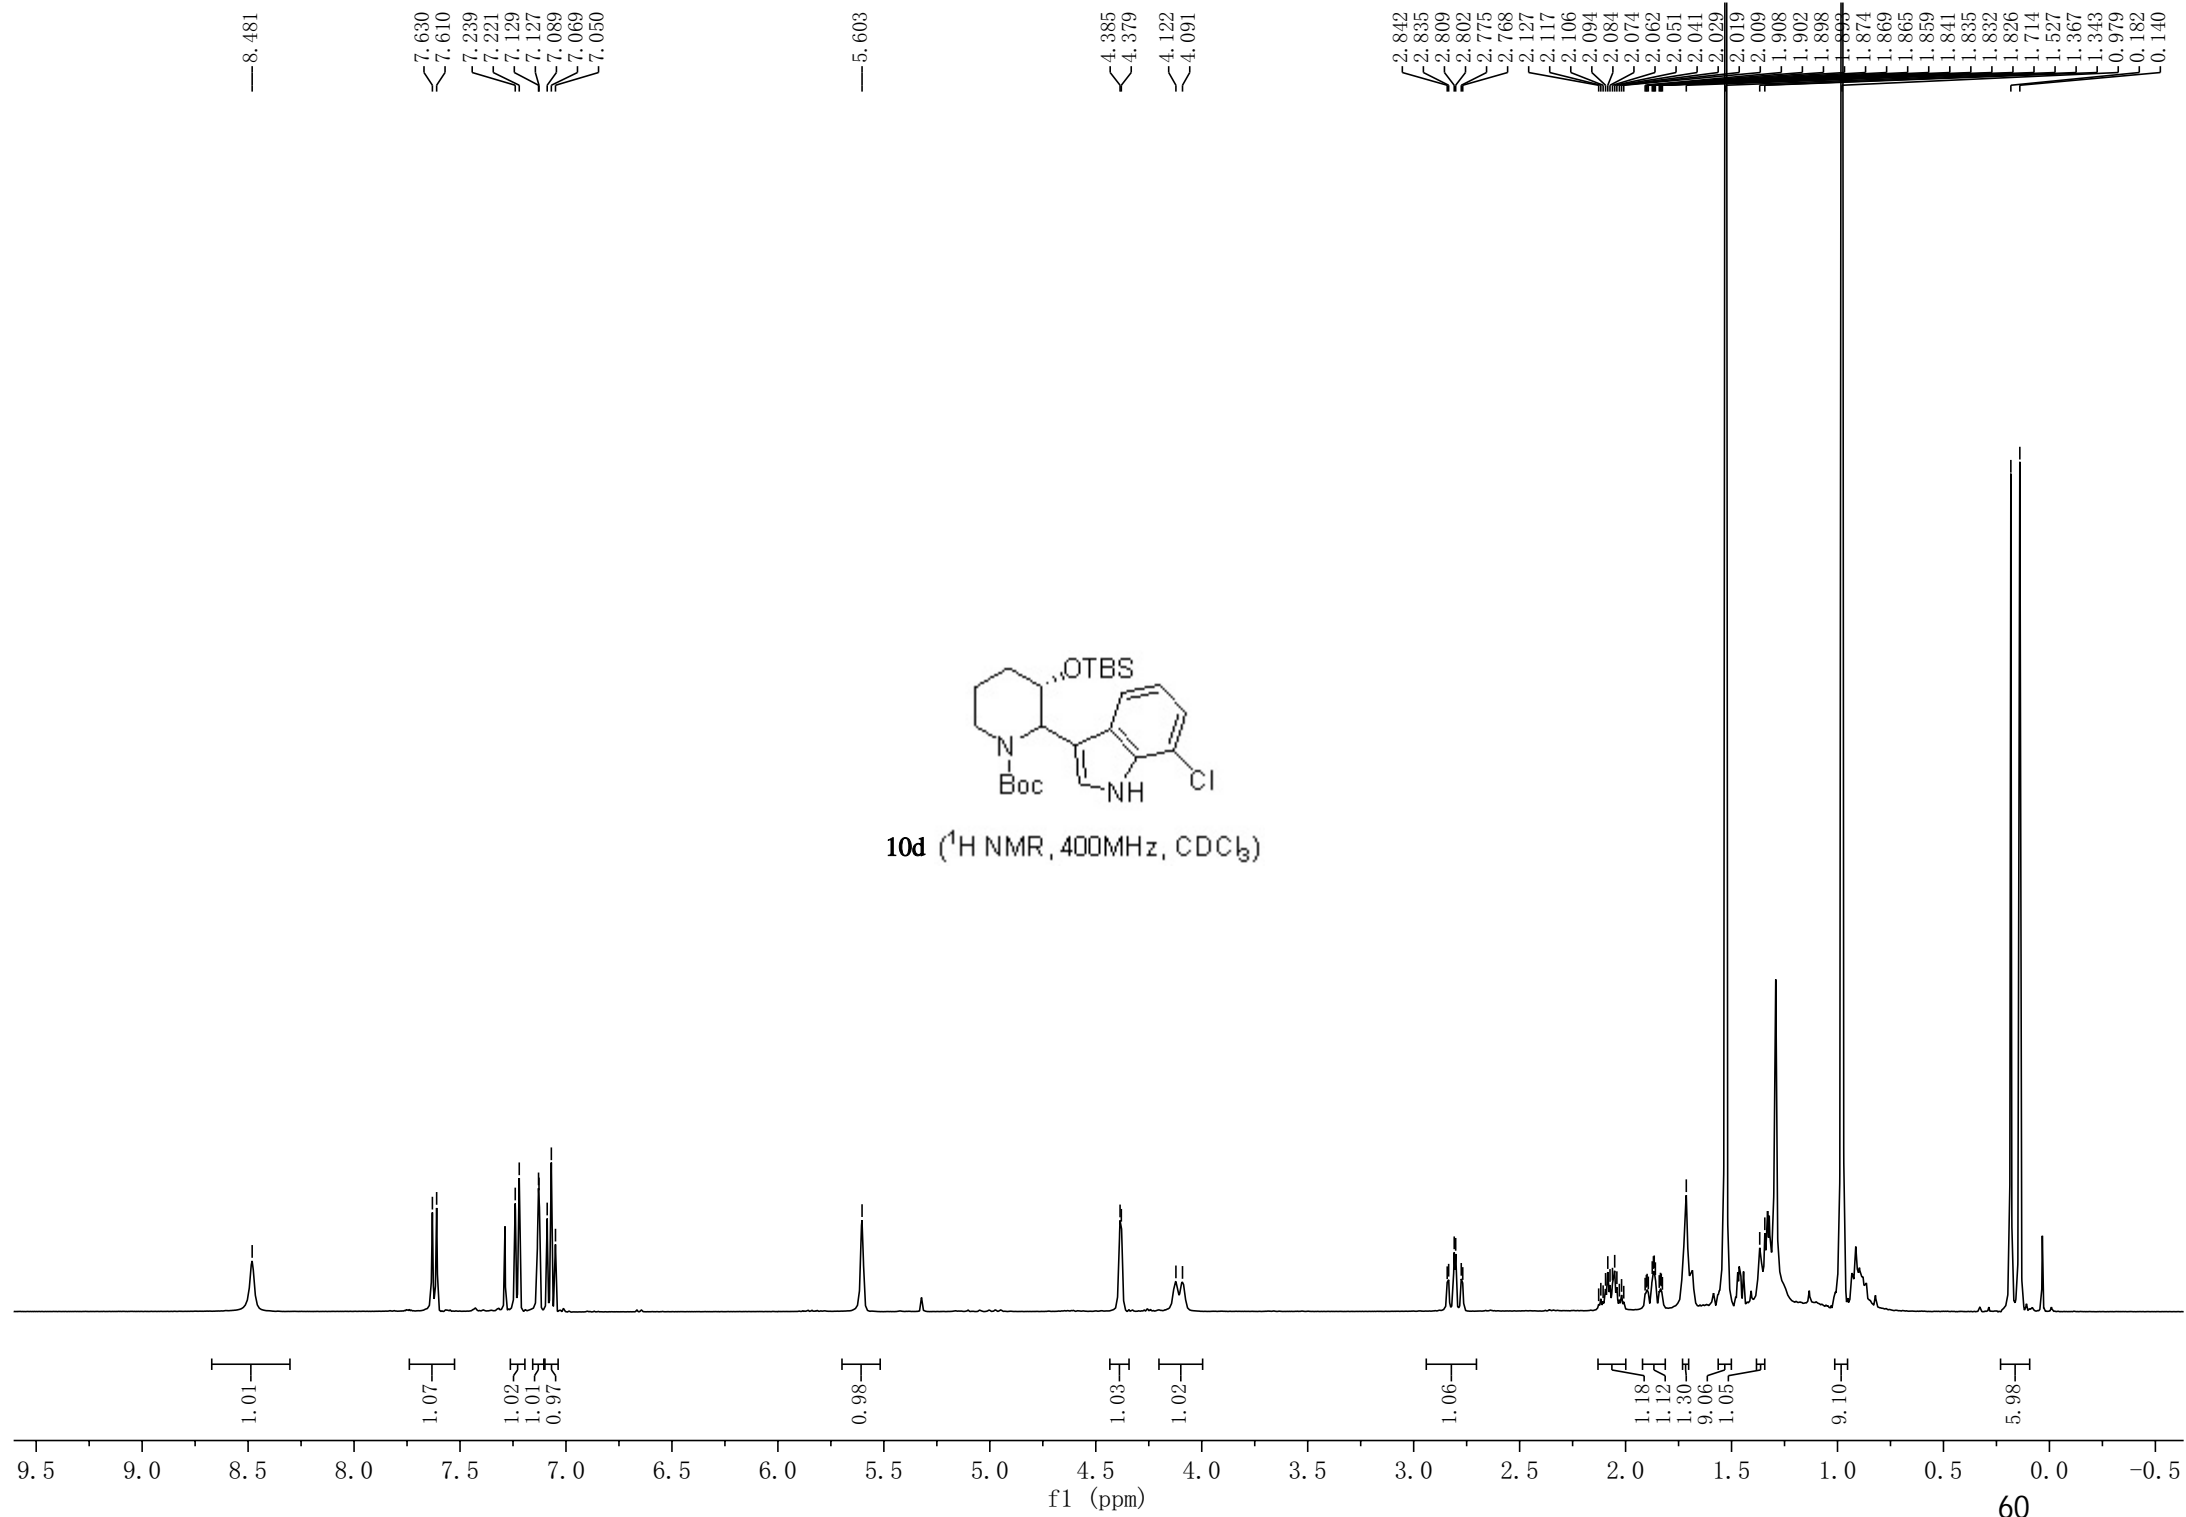

— 155.673

— 133.607

— 128.227

122.567

121.793

120.622

118.739

116.734

115.593

— 79.571

— 67.549

— 55.467

— 39.759

29.840

28.676

28.133

25.959

19.554

18.236

— -4.682

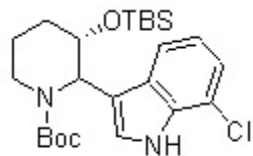

10d ( $^{13}\text{C}$  NMR, 100MHz,  $\text{CDCl}_3$ )

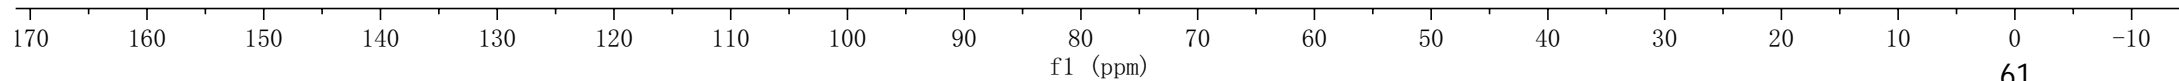

8.091  
7.580  
7.562  
7.087  
7.084  
7.081  
7.078  
7.072  
7.053  
7.047  
7.032

5.610

4.413  
4.406  
4.160  
4.142  
4.125  
4.108

2.904  
2.897  
2.871  
2.864  
2.838  
2.831  
2.519  
2.127  
2.116  
2.106  
2.094  
2.083  
2.074  
2.061  
2.051  
2.041  
2.029  
2.019  
2.008  
1.915  
1.909  
1.905  
1.900  
1.881  
1.876  
1.872  
1.867  
1.848  
1.842  
1.839  
1.834  
1.698  
1.669  
1.513  
0.976  
0.185  
0.135

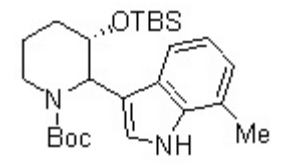

10e (<sup>1</sup>H NMR, 400MHz, CDCl<sub>3</sub>)

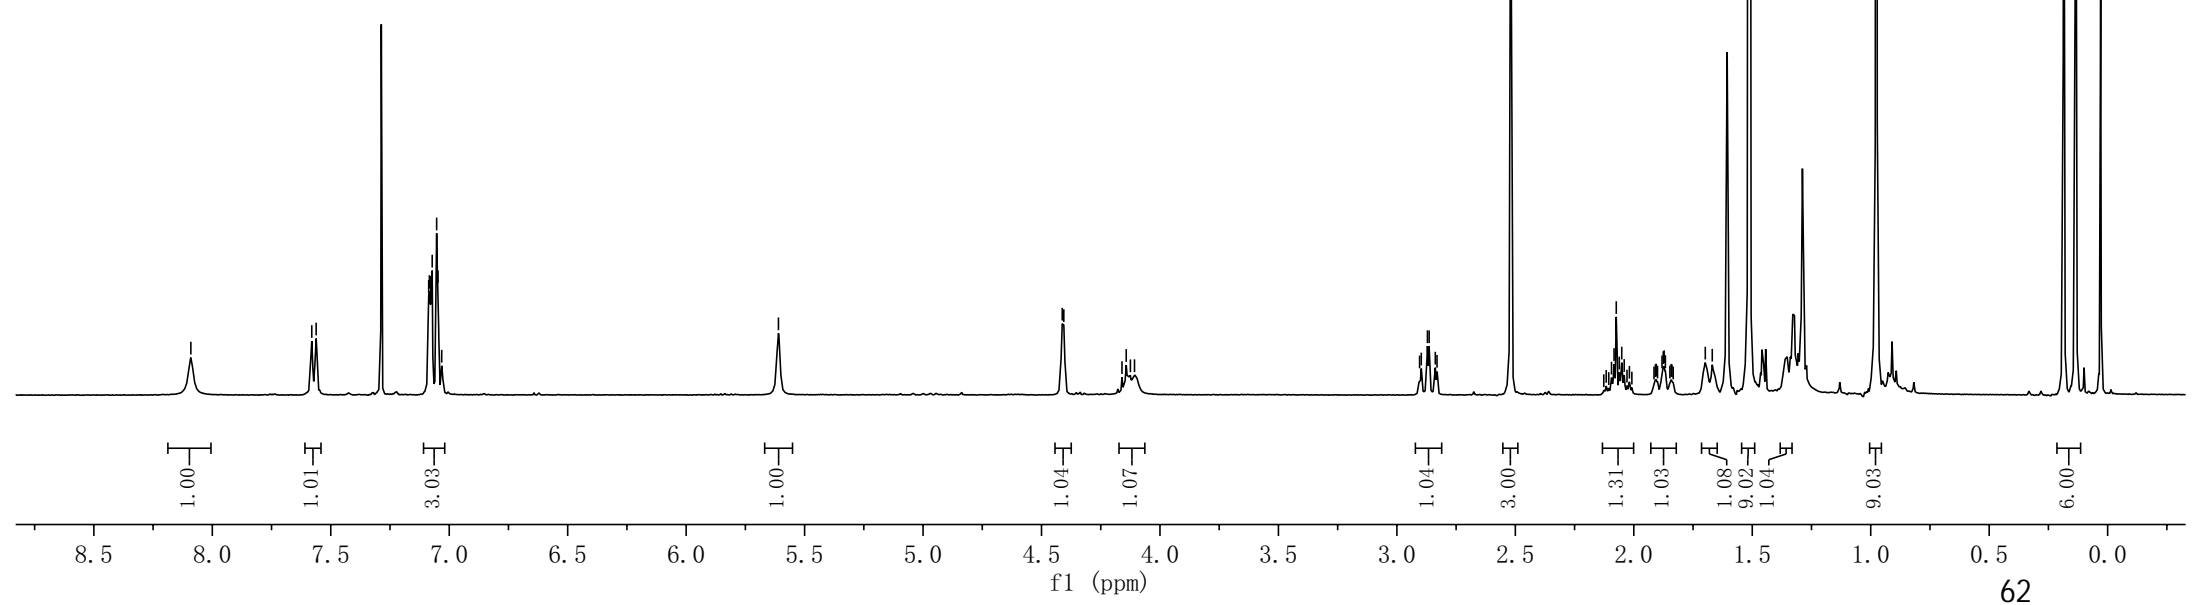

— 155.670

— 135.795

— 126.132  
— 122.780  
— 121.571  
— 120.260  
— 119.901  
— 117.631  
— 114.758

— 79.285

— 67.574

— 55.609

— 39.637

— 28.555  
— 27.957  
— 25.859

— 19.454  
— 18.120  
— 16.597

— -4.766  
— -4.814

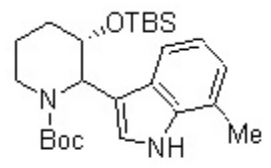

10e (<sup>13</sup>C NMR, 100MHz, CDCl<sub>3</sub>)

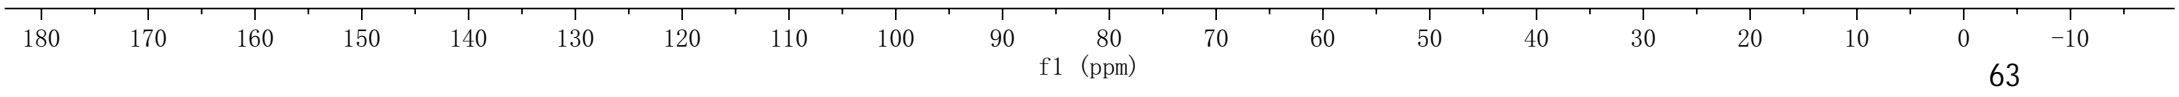

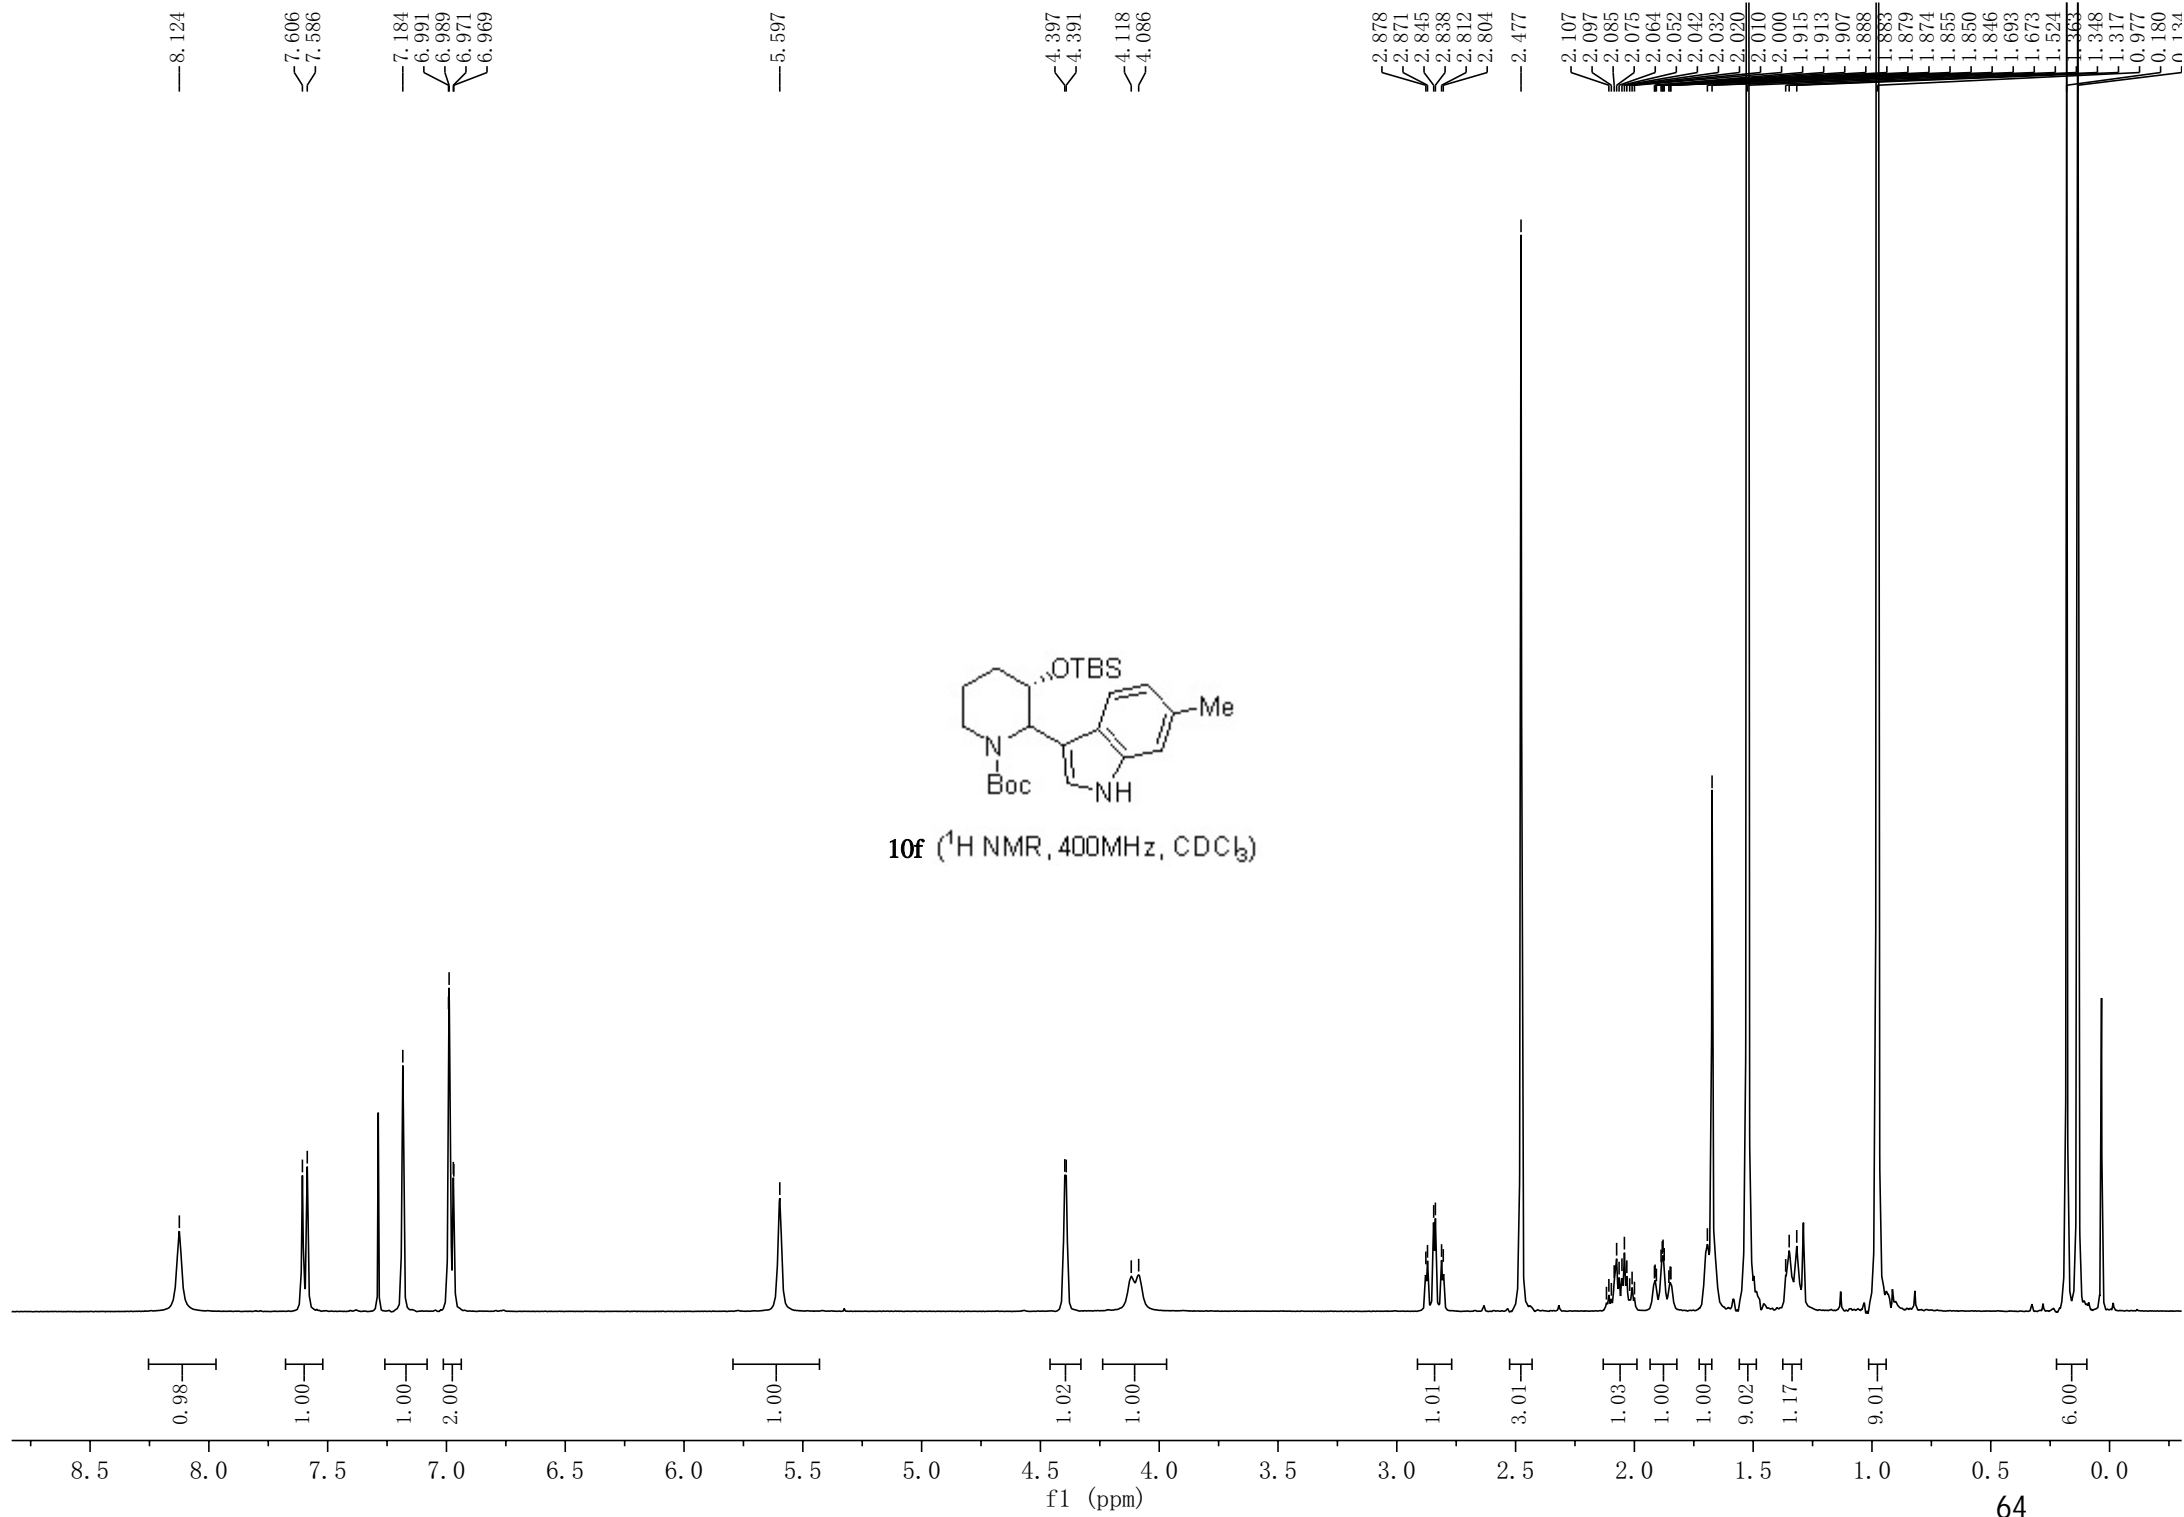



— 155.612  
— 136.644  
— 132.123  
— 124.444  
— 121.447  
— 121.178  
— 119.575  
— 114.057  
— 110.992  
— 79.241  
— 67.520  
— 55.483  
— 39.555  
— 28.553  
— 28.012  
— 25.847  
— 21.604  
— 19.481  
— 18.113  
— 4.791  
— 4.832

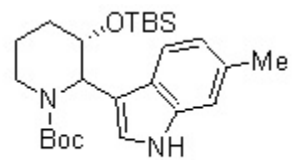

10f (<sup>13</sup>C NMR, 100MHz, CDCl<sub>3</sub>)

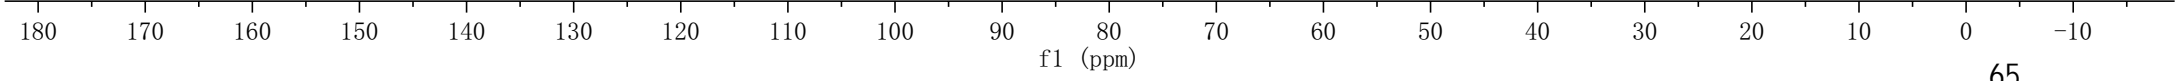

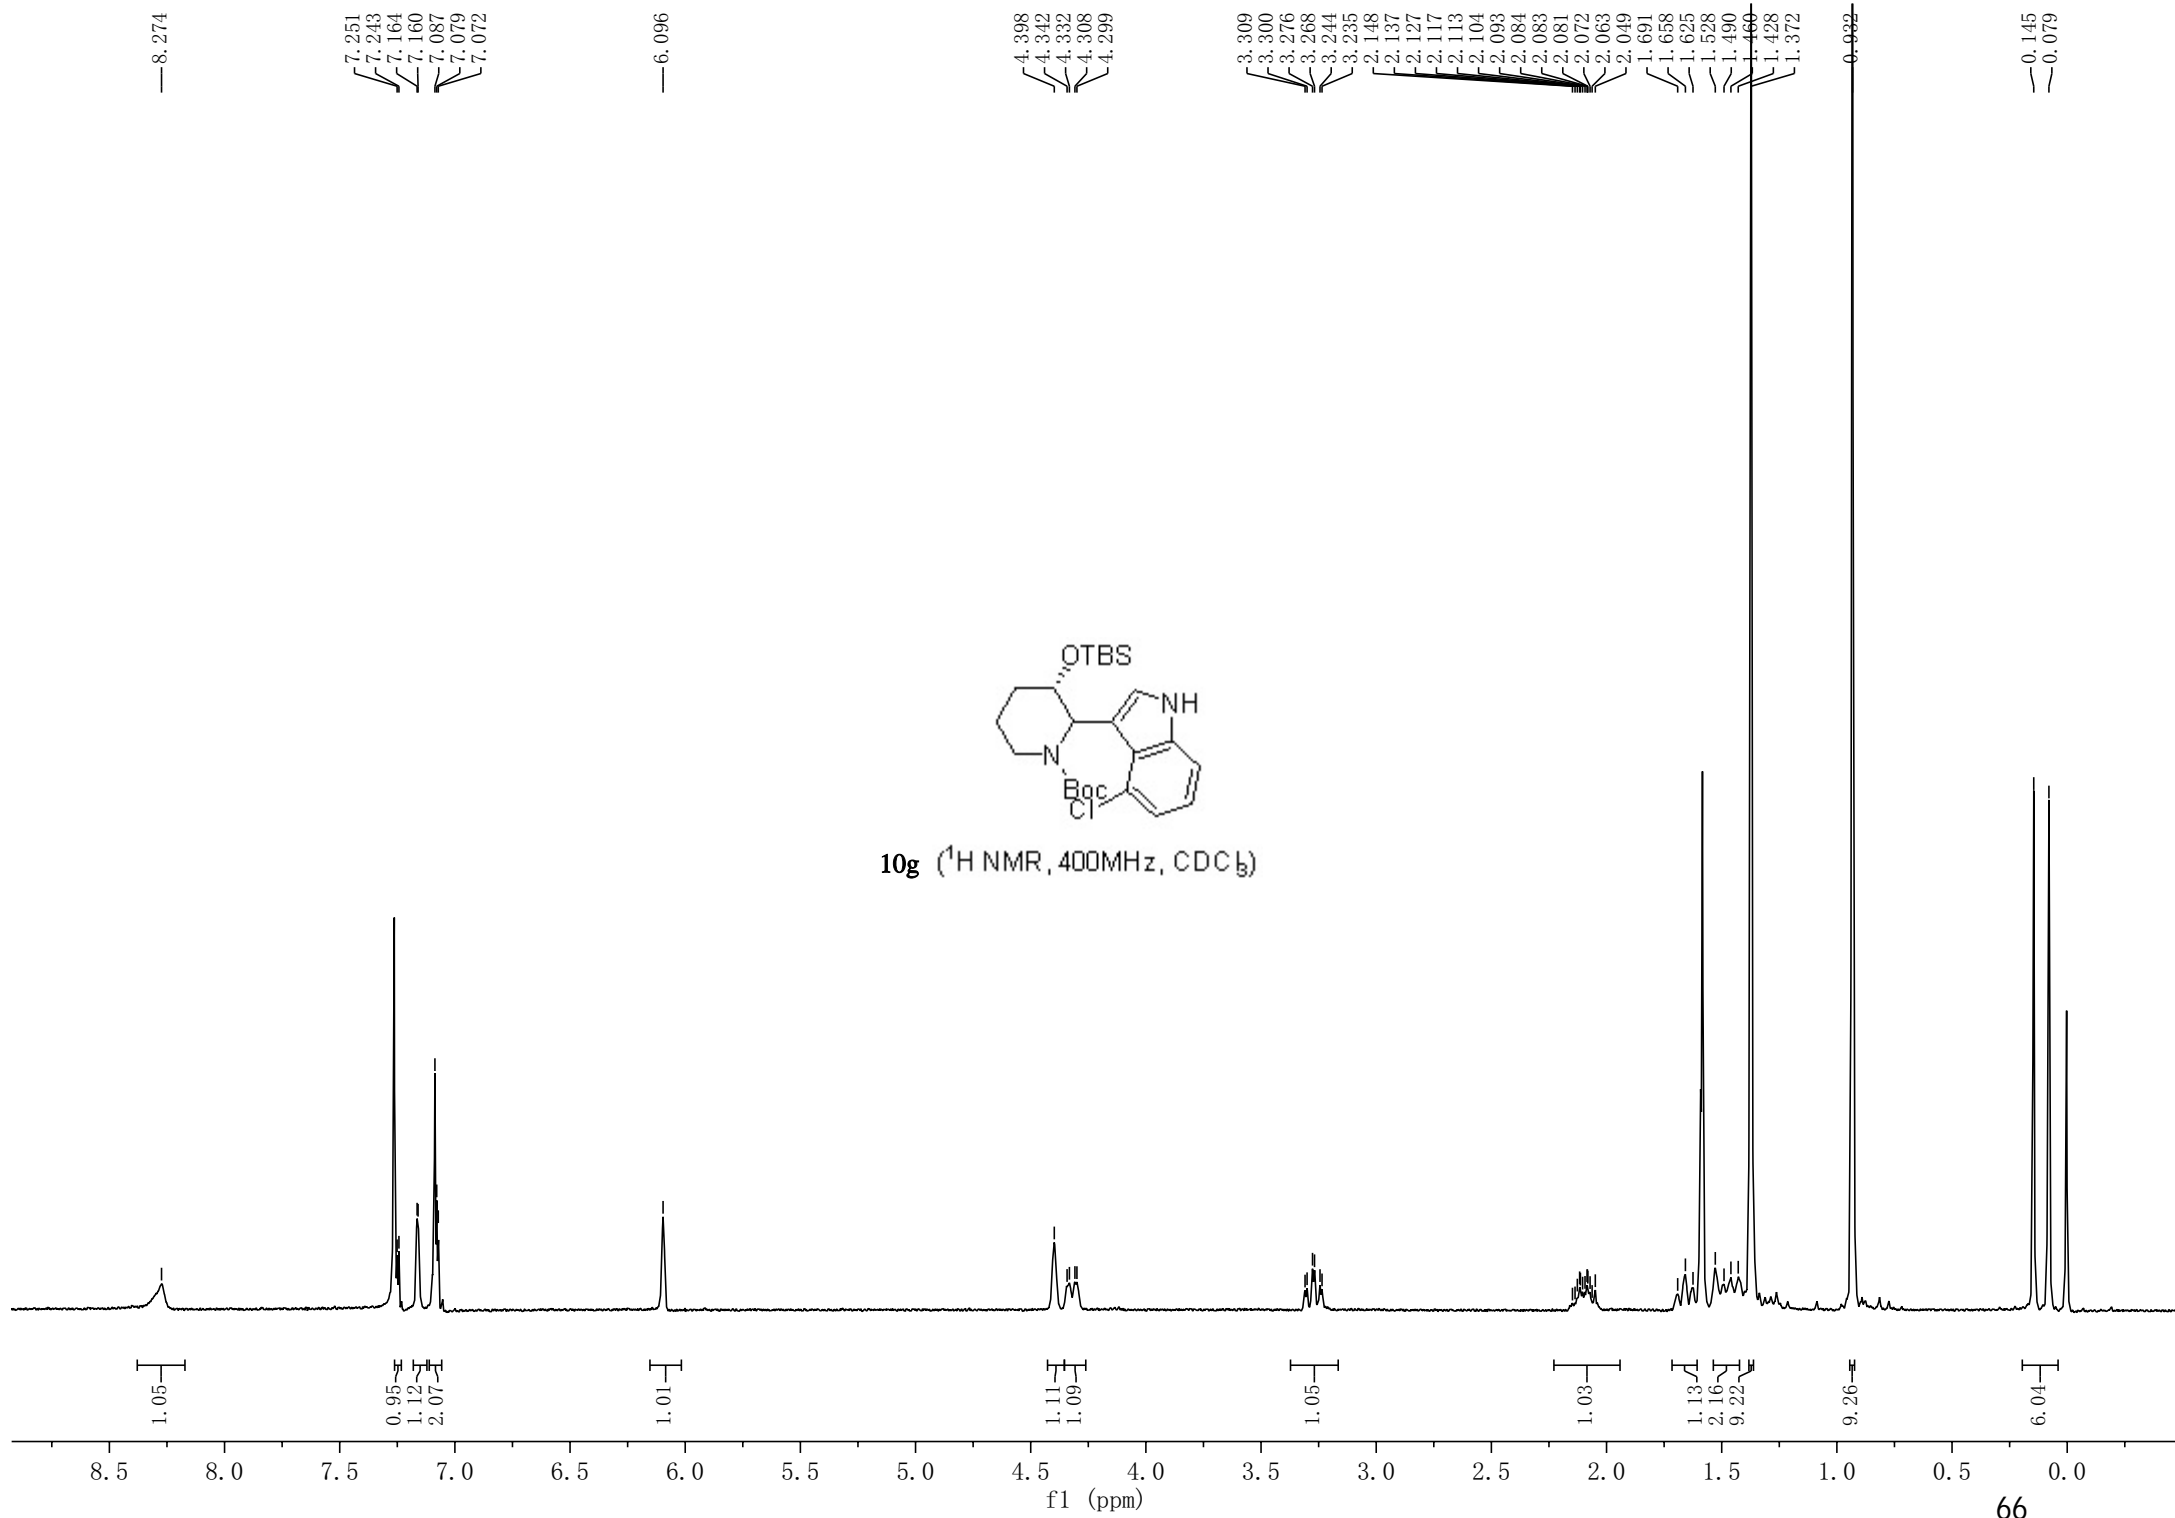

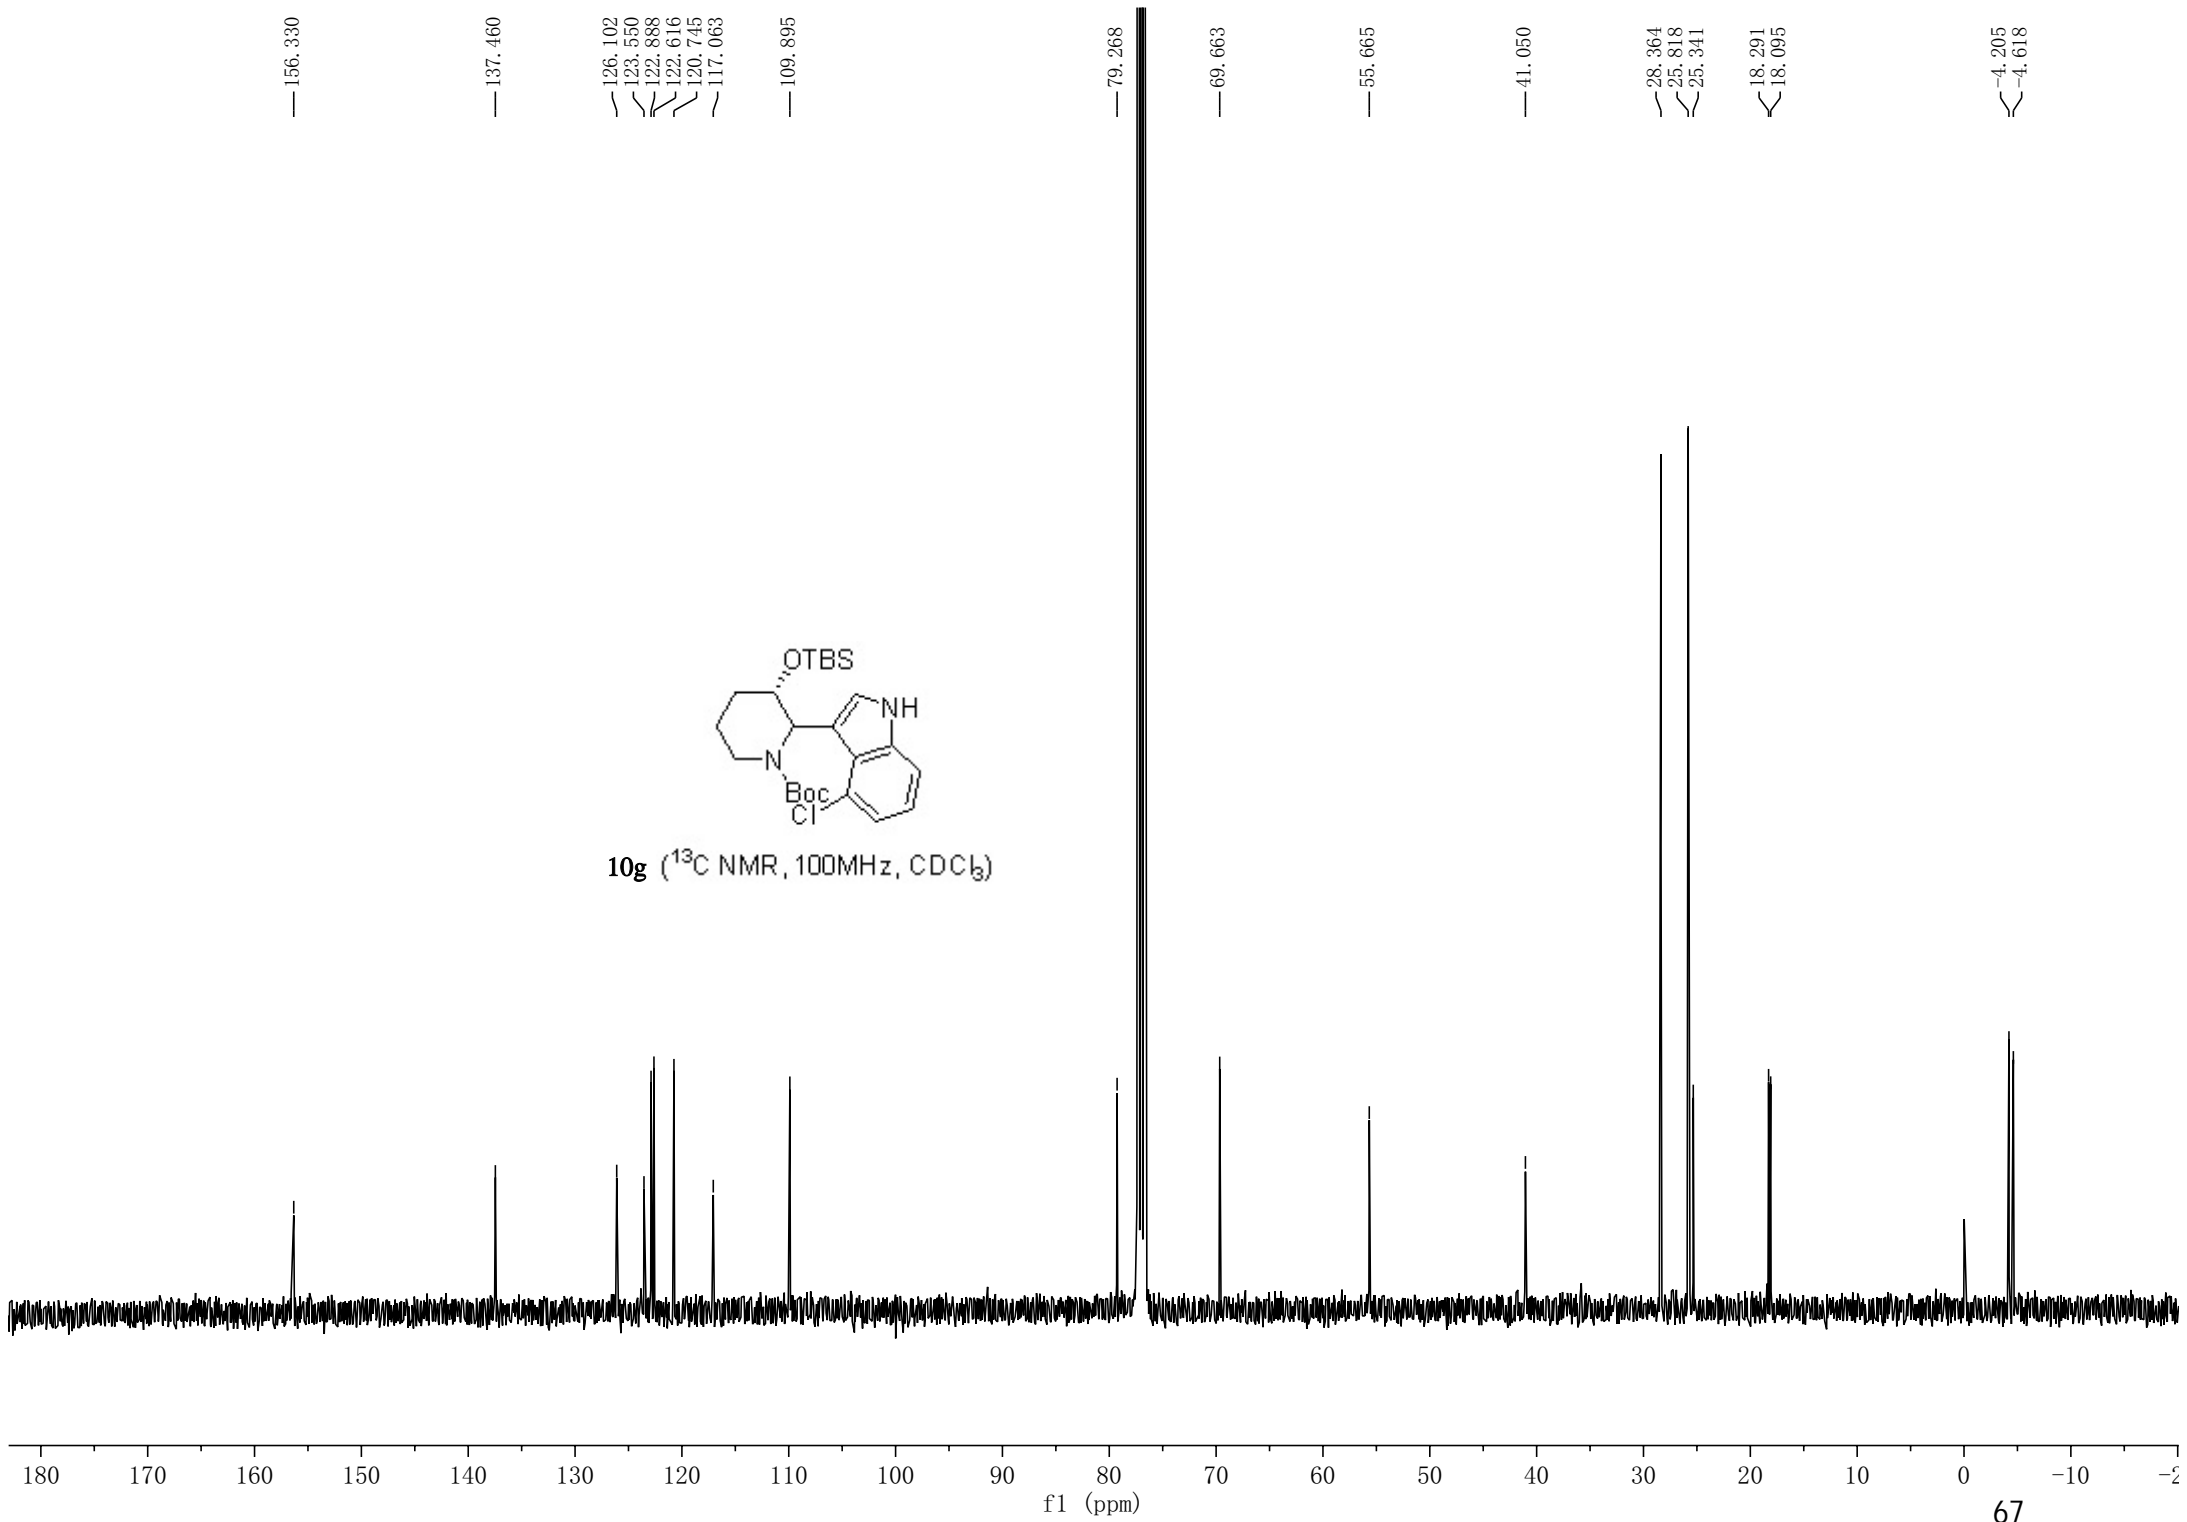

— 8.829

7.250  
7.241  
7.231  
7.132  
7.127  
6.963  
6.943  
6.923

6.238  
6.216

4.392  
4.344  
4.332  
4.310  
4.299

3.317  
3.307  
3.284  
3.274  
3.251  
3.242

2.132  
2.123  
2.110  
2.100  
2.091  
2.079  
2.068  
2.059  
2.045  
2.036

1.696  
1.691  
1.687  
1.662  
1.657  
1.633  
1.629  
1.624  
1.528  
1.520

1.494  
1.479  
1.472  
1.463  
1.429  
1.388  
1.379  
1.259  
0.933  
0.150  
0.086  
0.079

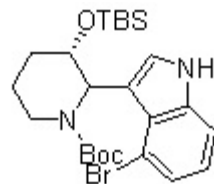

10h (<sup>1</sup>H NMR, 400MHz, CDCl<sub>3</sub>)

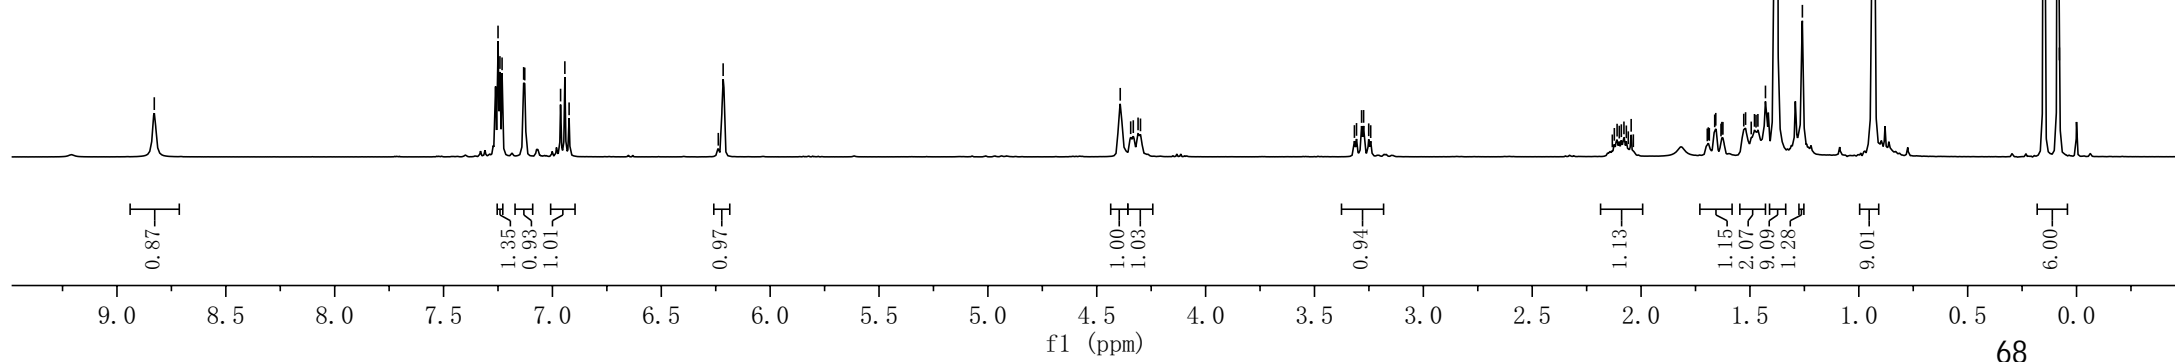

— 156.759

— 137.478

124.894  
124.175  
124.115  
123.468  
122.817

117.053  
113.885  
110.772

— 79.629

— 70.007

— 55.342

— 41.348

28.562  
26.018  
25.083

22.812  
18.381  
18.256  
14.236

— 3.789  
— 4.331

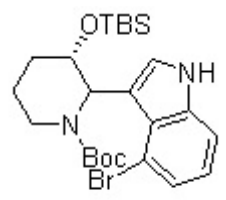

10h (<sup>13</sup>C NMR, 100MHz, CDCl<sub>3</sub>)

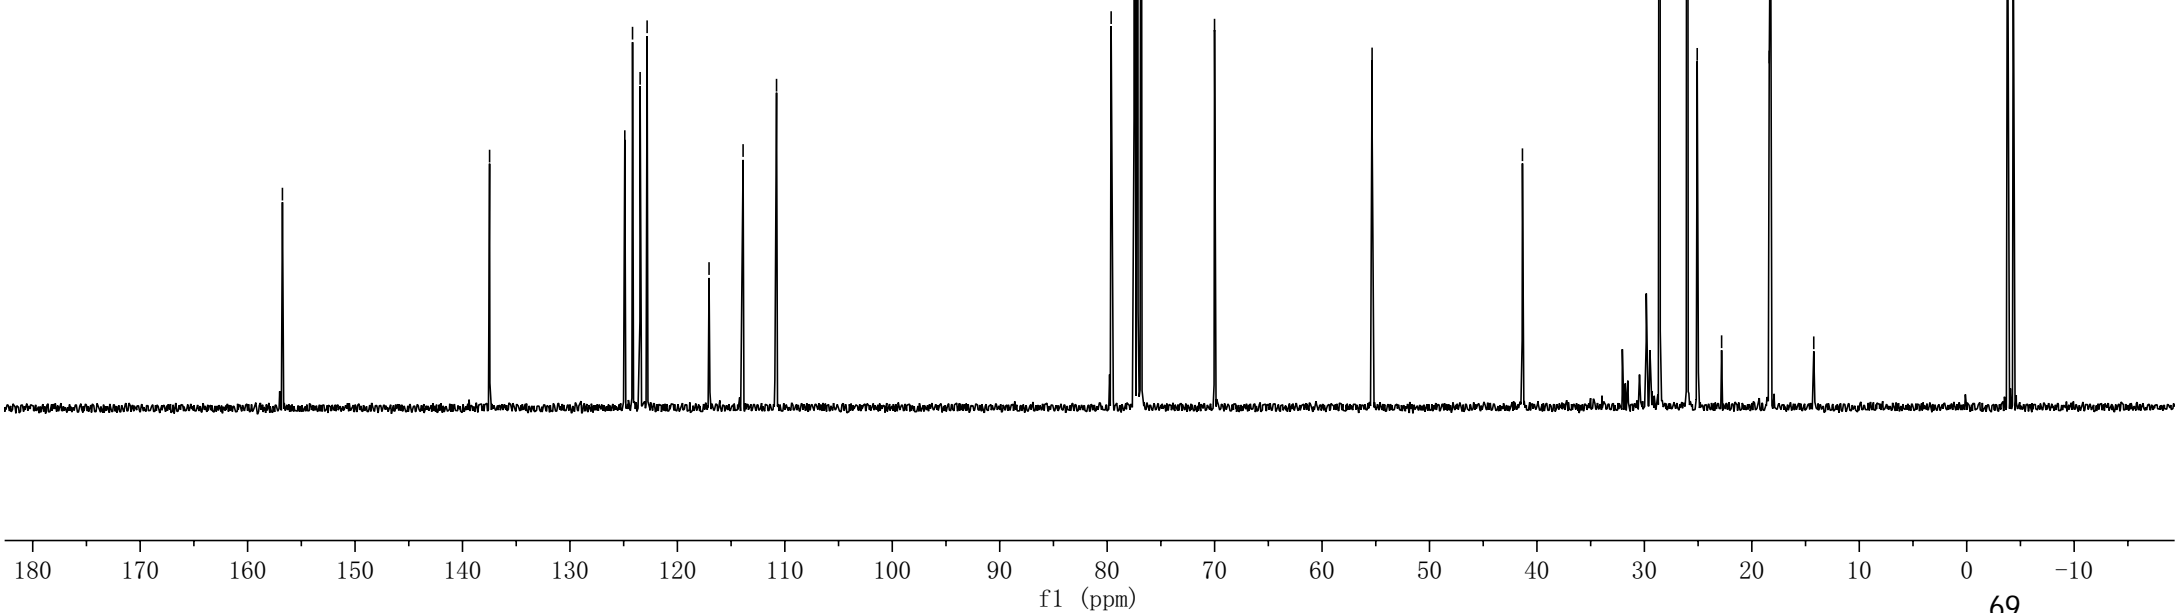

8.457

7.794  
7.791

7.565  
7.287  
7.276  
7.272  
7.255  
7.251  
7.242  
7.220

5.782

4.057  
4.045  
4.030  
4.016  
4.004  
3.863  
3.857  
3.852  
3.849  
3.843

2.505  
2.483  
2.478  
2.471  
2.466  
2.451  
2.431  
2.155  
2.125  
2.106  
2.100  
2.081  
2.049  
1.870  
1.861  
1.850  
1.838

1.298

0.884

0.145  
0.064

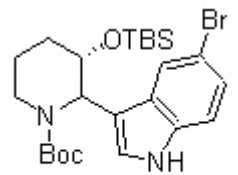

10i-1 (<sup>1</sup>H NMR, 400MHz, CDCl<sub>3</sub>)

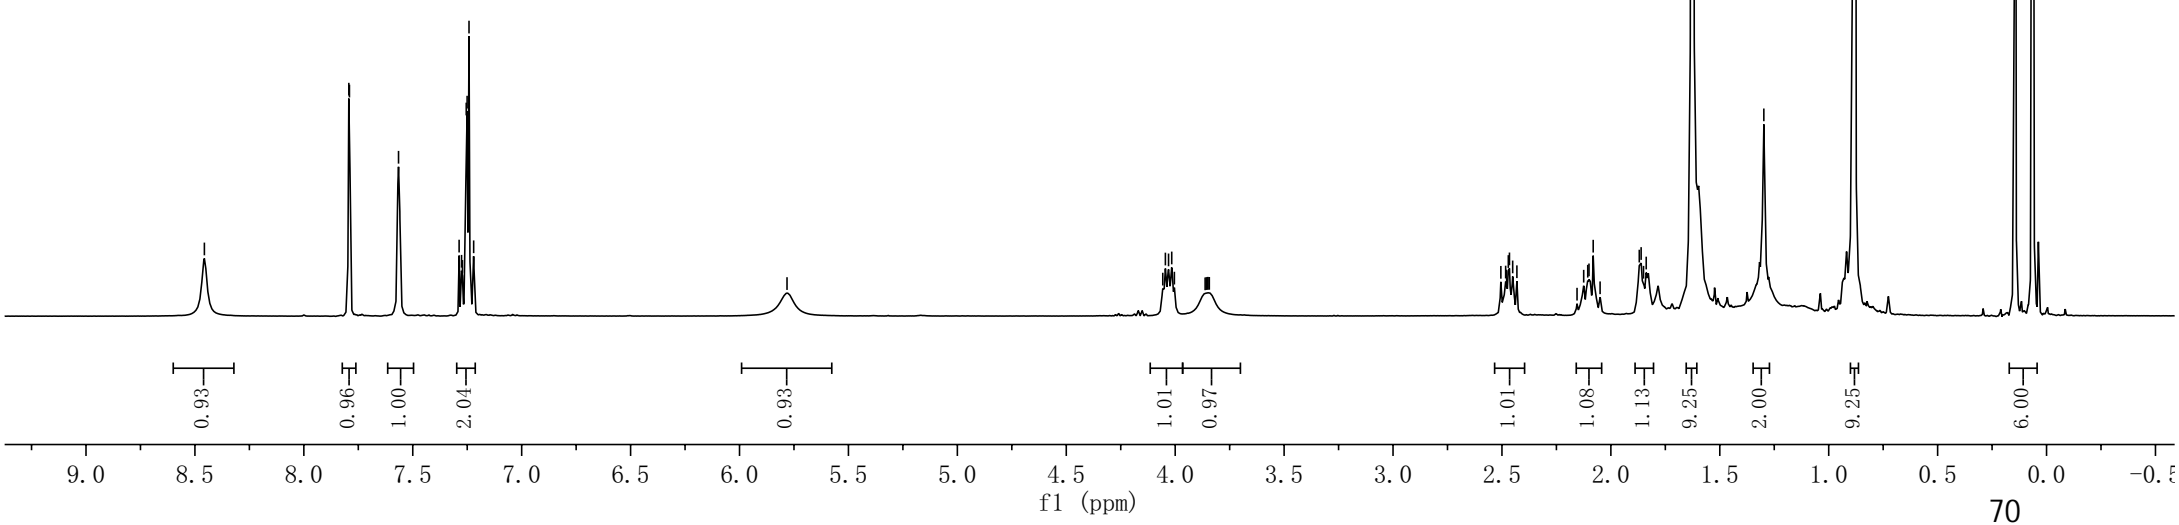

— 154.714

— 134.564

— 129.513

— 125.732

— 124.726

— 122.592

— 112.982

— 112.391

— 110.835

— 80.249

— 71.379

— 29.824

— 29.610

— 28.776

— 25.924

— 24.877

— 22.814

— 18.145

— -4.779

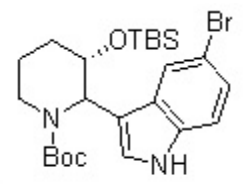

10i-1 (<sup>13</sup>C NMR, 100MHz, CDCl<sub>3</sub>)

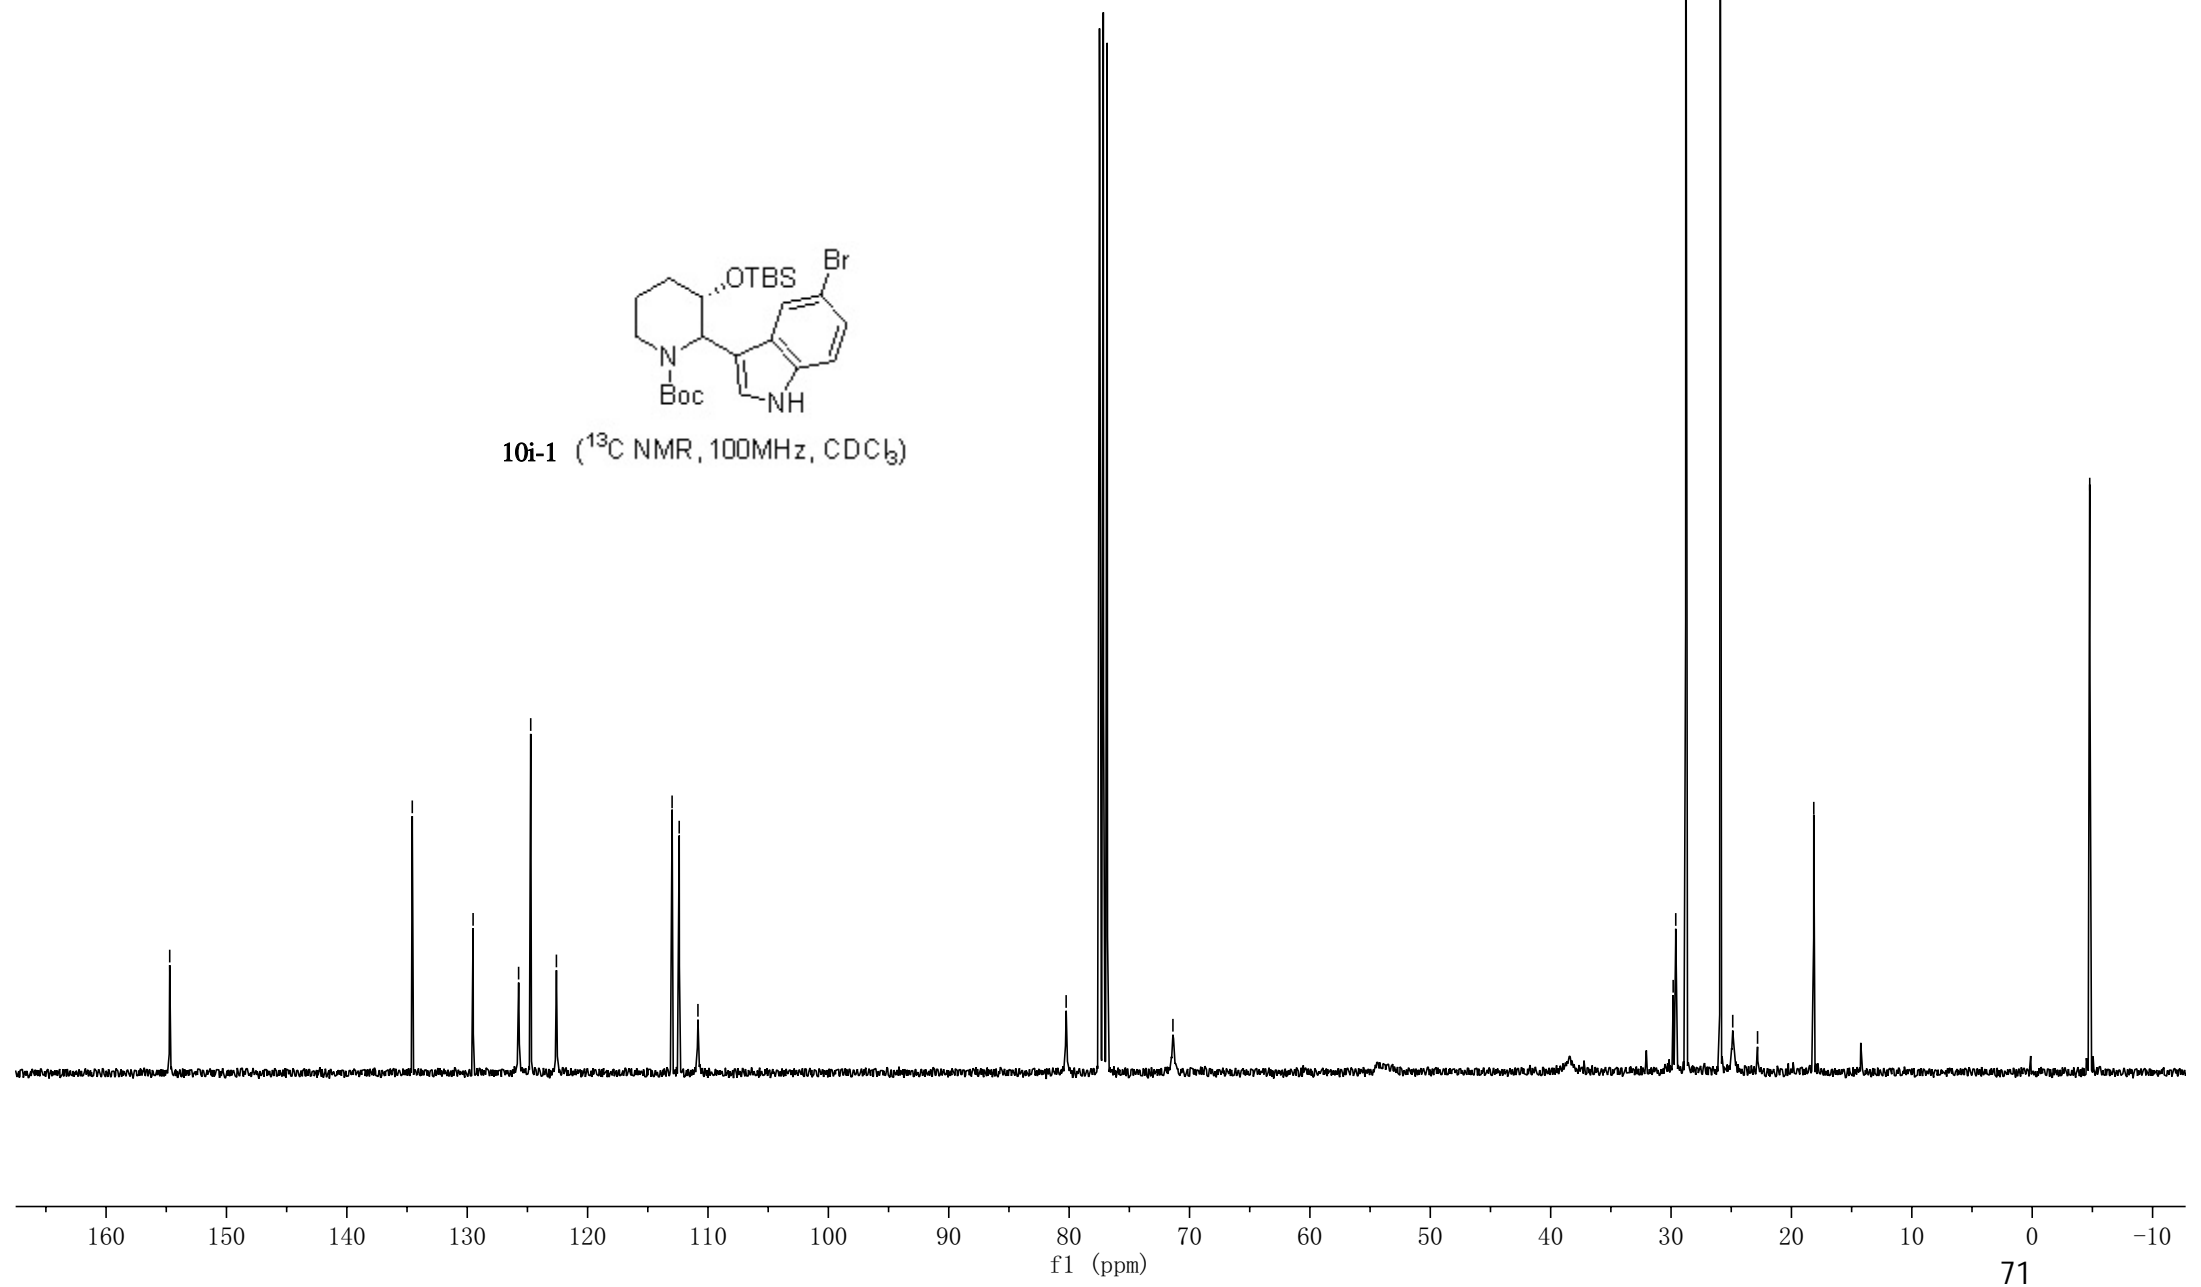

— 8.281

7.904  
7.901

7.315  
7.311  
7.293  
7.288  
7.261  
7.239  
7.074

— 5.552

4.355  
4.350

4.089  
4.056

2.755  
2.748  
2.722  
2.715  
2.689  
2.682  
2.115  
2.105  
2.094  
2.082  
2.073  
2.062  
2.050  
2.040  
2.030  
2.018  
2.007  
1.998  
1.951  
1.945  
1.942  
1.935  
1.917  
1.911  
1.908  
1.902  
1.884  
1.878  
1.875  
1.869  
1.750  
1.710  
1.577  
1.363  
1.328  
1.315  
0.975  
0.169  
0.131

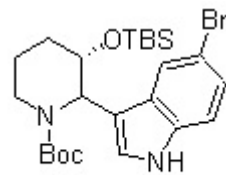

10i-2 (<sup>1</sup>H NMR, 400MHz, CDCl<sub>3</sub>)

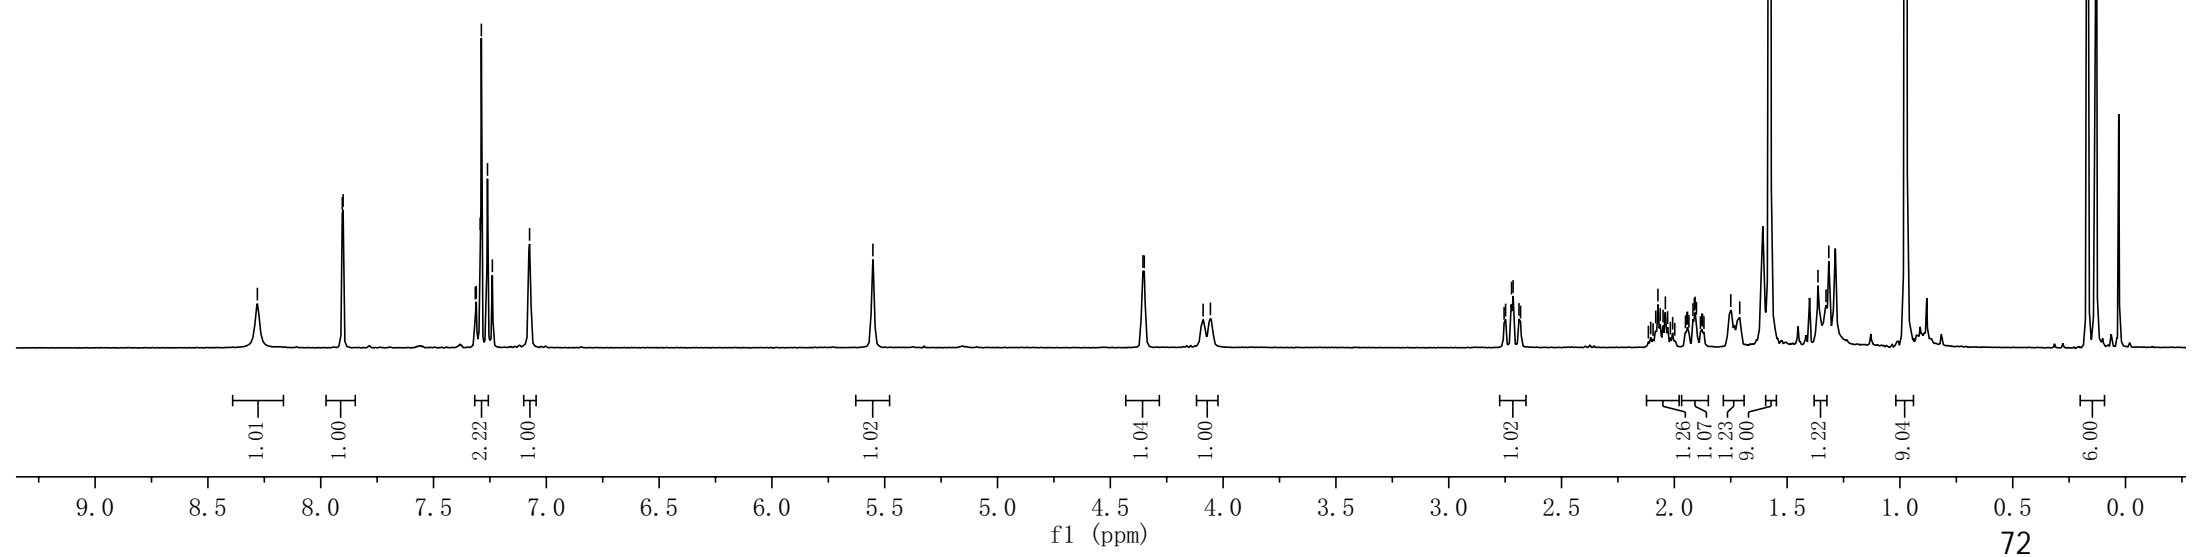



— 155.396

— 134.743

— 128.532

— 125.267

— 122.953

— 122.732

— 114.066

— 113.131

— 112.401

— 79.689

— 67.255

— 55.030

— 39.418

— 28.586

— 28.357

— 25.831

— 19.565

— 18.102

— -4.832

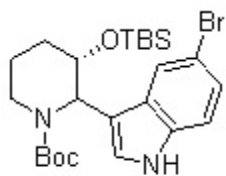

10i-2 (<sup>13</sup>C NMR, 100MHz, CDCl<sub>3</sub>)

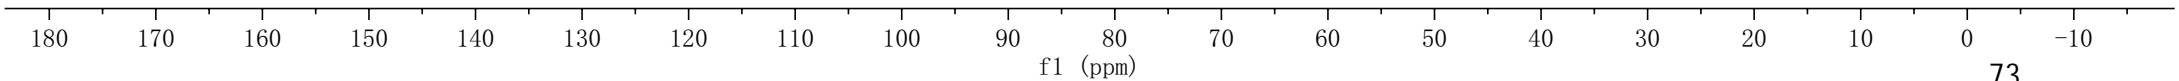

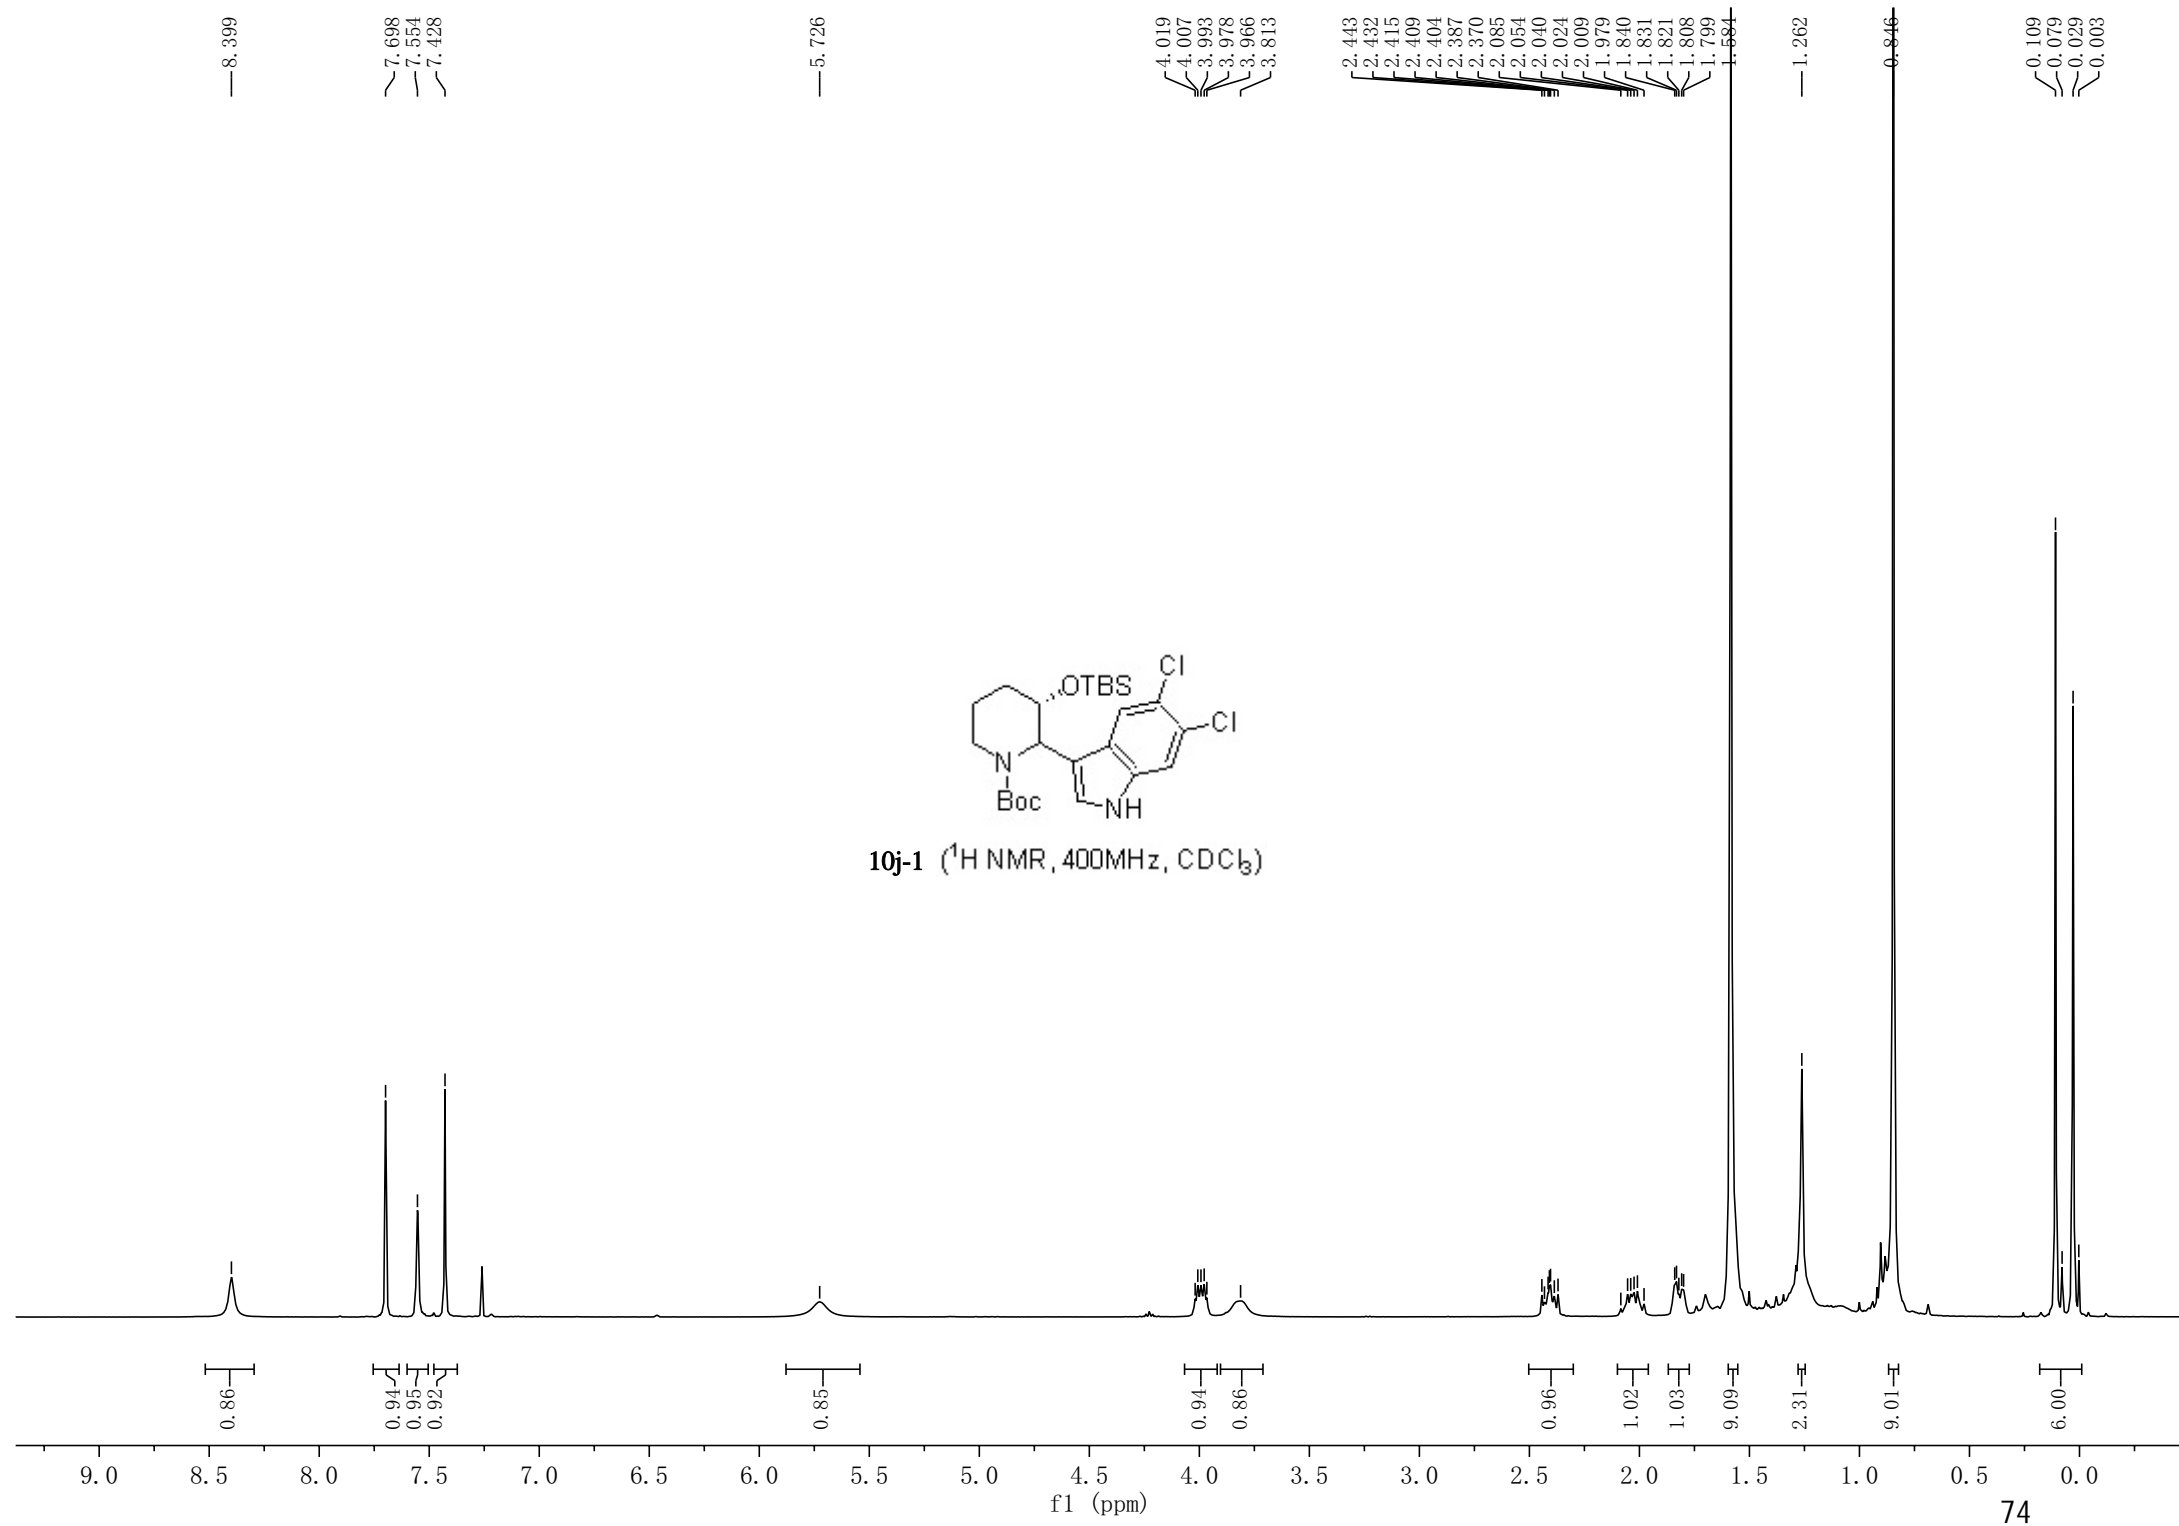

— 154.618

— 134.630

— 127.404

— 126.260

— 125.624

— 123.582

— 120.946

— 112.268

— 110.978

— 80.242

— 71.147

— 29.707

— 29.442

— 29.369

— 28.623

— 25.782

— 24.702

— 22.697

— 18.008

— 4.893

— 4.918

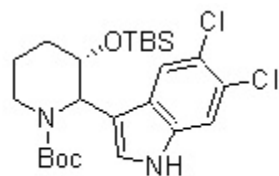

10j-1 (<sup>13</sup>C NMR, 100MHz, CDCl<sub>3</sub>)

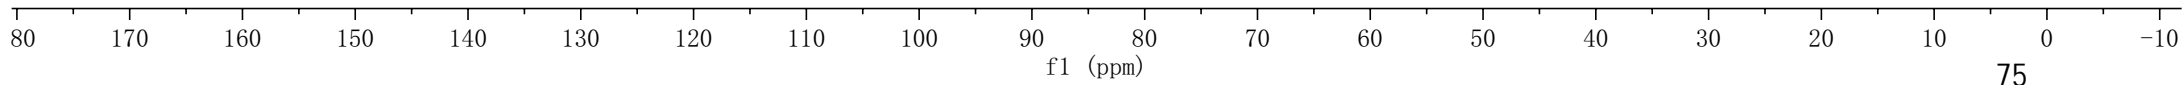

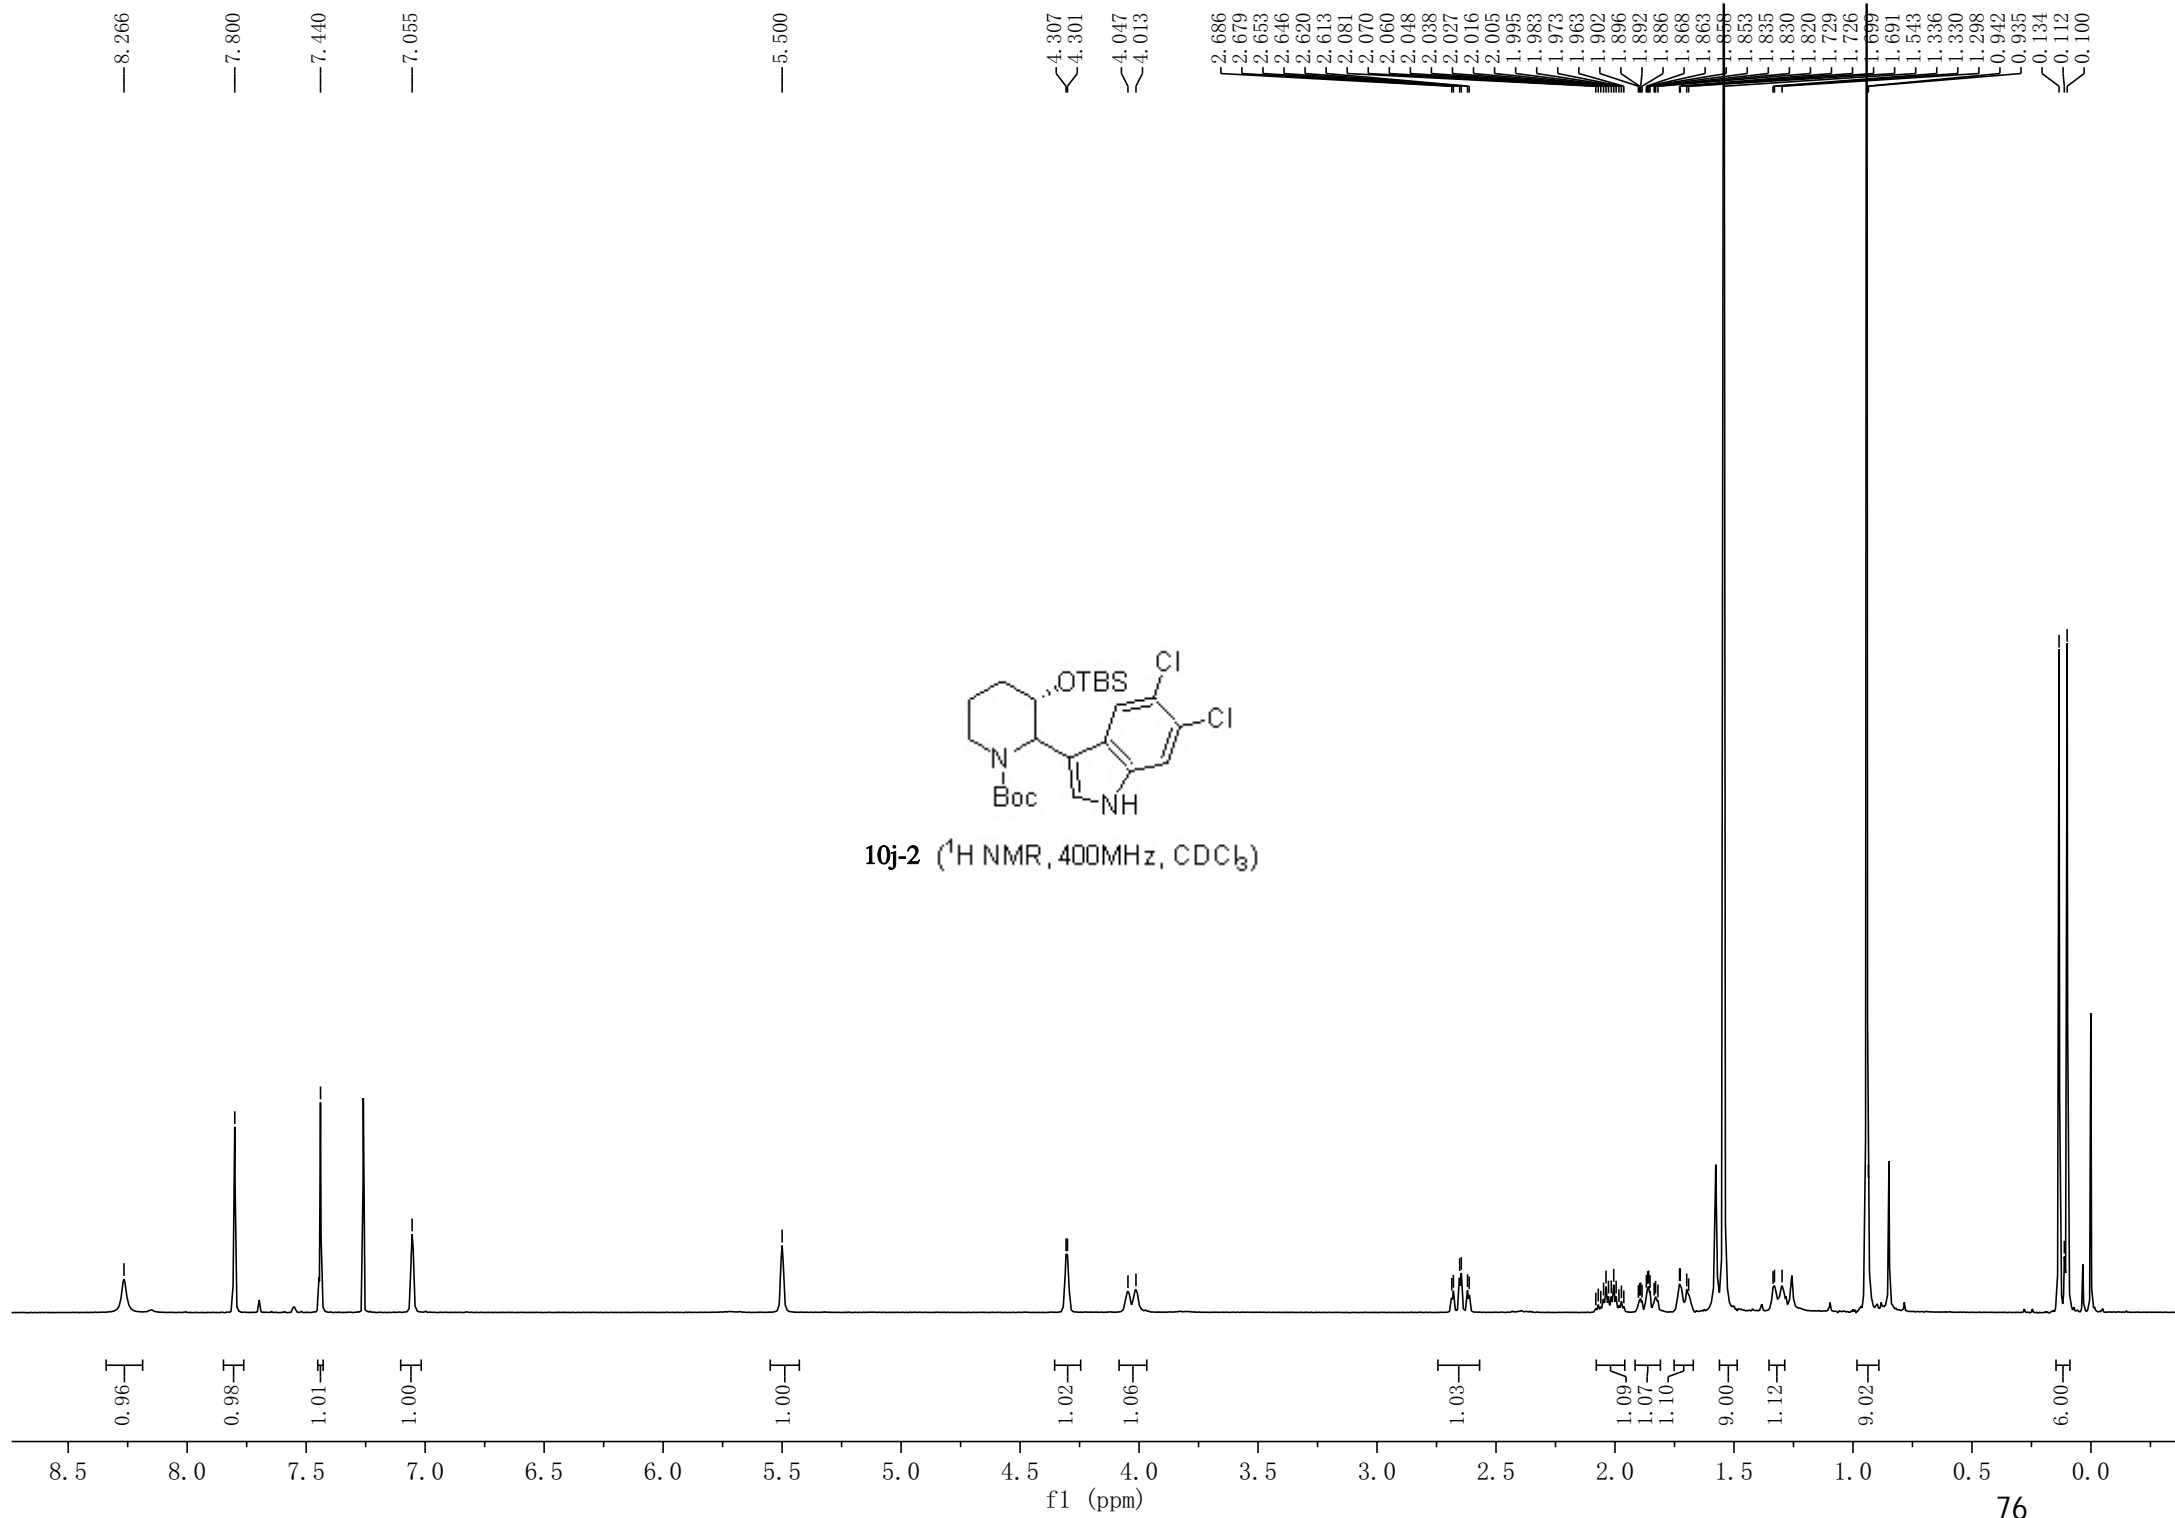

— 155.528

— 135.039

126.697

126.482

124.115

123.747

121.327

114.342

112.548

— 79.935

— 67.276

— 55.023

— 39.603

28.757

28.712

28.448

25.953

19.675

18.236

— 4.681

— 4.710

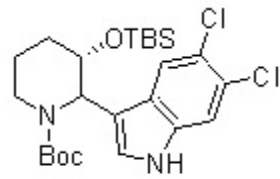

10j-2 (<sup>13</sup>C NMR, 100MHz, CDCl<sub>3</sub>)

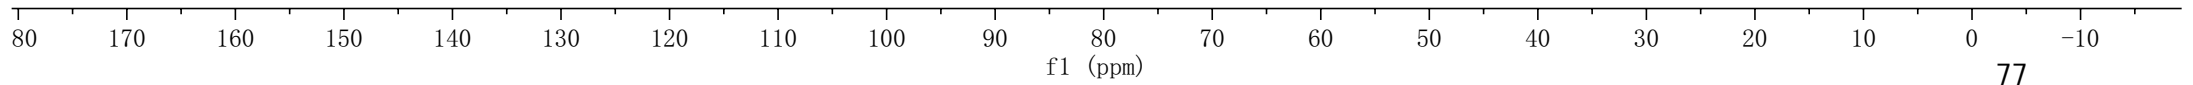

8.087  
7.609  
7.590  
7.392  
7.372  
7.316  
7.299  
7.285  
7.260  
7.247  
7.230  
7.225  
7.204  
7.164  
7.147  
7.125  
7.105  
7.087  
7.012  
5.623  
5.617  
5.602  
5.597  
5.480  
5.472  
5.460  
5.452  
5.212  
5.195  
5.057  
5.040  
4.695  
4.679  
4.672  
4.662  
4.657  
4.640

2.395  
2.372  
2.364  
2.350  
2.341  
2.333  
2.320  
2.311  
2.290  
2.212  
2.205  
2.197  
2.191  
2.182  
2.175  
2.168  
2.161  
2.145  
2.144  
2.140  
2.138  
2.129  
2.125  
1.074  
1.000

0.679  
0.651  
-0.000  
-0.143  
-0.153

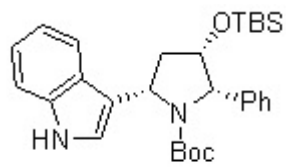

12a (<sup>1</sup>H NMR, 400MHz, CDCl<sub>3</sub>)

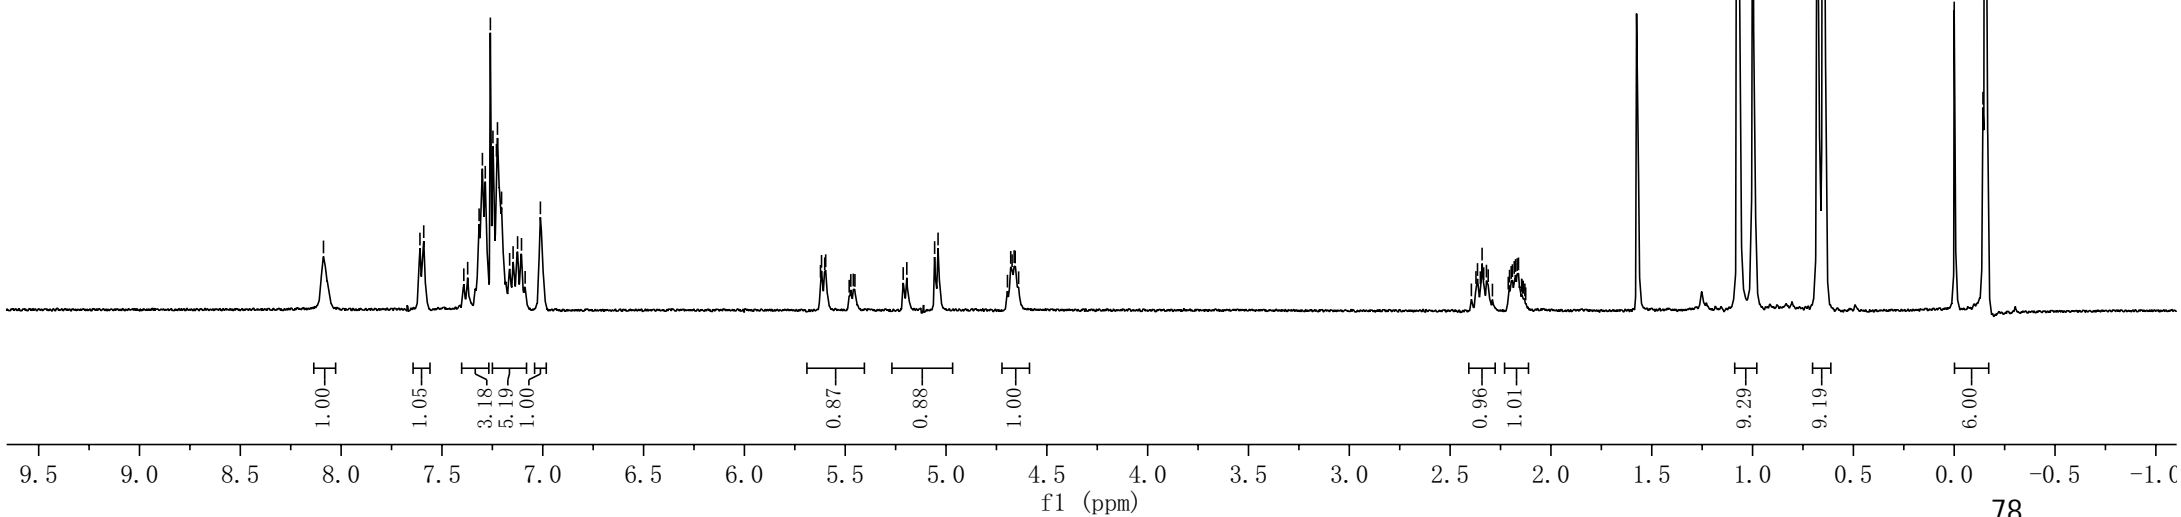

154.496  
154.384

140.468  
138.970  
137.146  
136.566

128.525  
127.902  
127.780  
127.702  
127.554  
126.920  
126.760  
126.638  
126.329  
125.703  
125.384  
122.042  
121.931  
121.675  
121.590  
120.994  
120.508  
120.413  
119.486  
119.294  
119.147  
119.016  
118.841  
118.716  
118.683  
118.594  
118.539  
111.562  
111.381  
111.233  
79.727  
79.549  
79.339

72.031  
71.472

66.110  
65.004

53.440  
53.316

40.350  
39.538

29.830  
28.278  
28.149  
25.744  
25.671  
25.446

18.025  
17.931  
17.807

-4.680  
-4.794  
-4.951  
-5.149

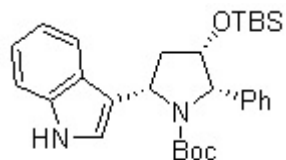

12a (<sup>13</sup>C NMR, 100MHz, CDCl<sub>3</sub>)

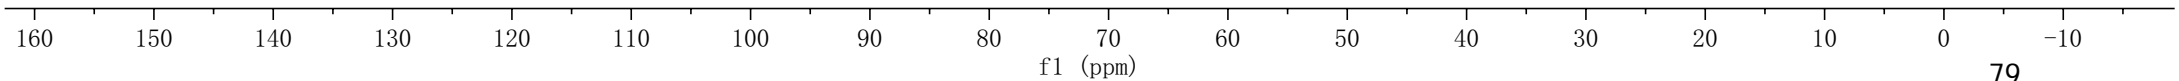

8.398  
8.157  
7.545  
7.524  
7.510  
7.488  
7.451  
7.430  
7.363  
7.332  
7.314  
7.296  
7.258  
7.243  
7.226  
7.208  
7.109  
7.088  
7.050  
7.026  
6.996  
6.993  
6.986  
6.981  
6.905  
6.902  
6.890  
5.560  
5.553  
5.539  
5.533  
5.533  
5.428  
5.421  
5.409  
5.402  
5.190  
5.173  
5.173  
5.062  
5.045  
5.045  
4.942  
4.930  
4.651  
4.637  
4.615  
4.599  
4.497  
4.484  
2.365  
2.343  
2.334  
2.320  
2.312  
2.291  
2.279  
2.151  
2.142  
2.138  
2.129  
2.128  
2.120  
2.113  
2.112  
2.108  
2.107  
2.099  
2.084  
2.076  
2.071  
2.062  
2.047  
2.047  
1.177  
1.089  
1.008  
0.680  
0.660  
0.461  
-0.004  
-0.143  
-0.163  
-0.180  
-0.303  
-0.408

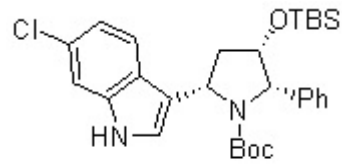

12b ( $^1\text{H}$  NMR, 400MHz,  $\text{CDCl}_3$ )

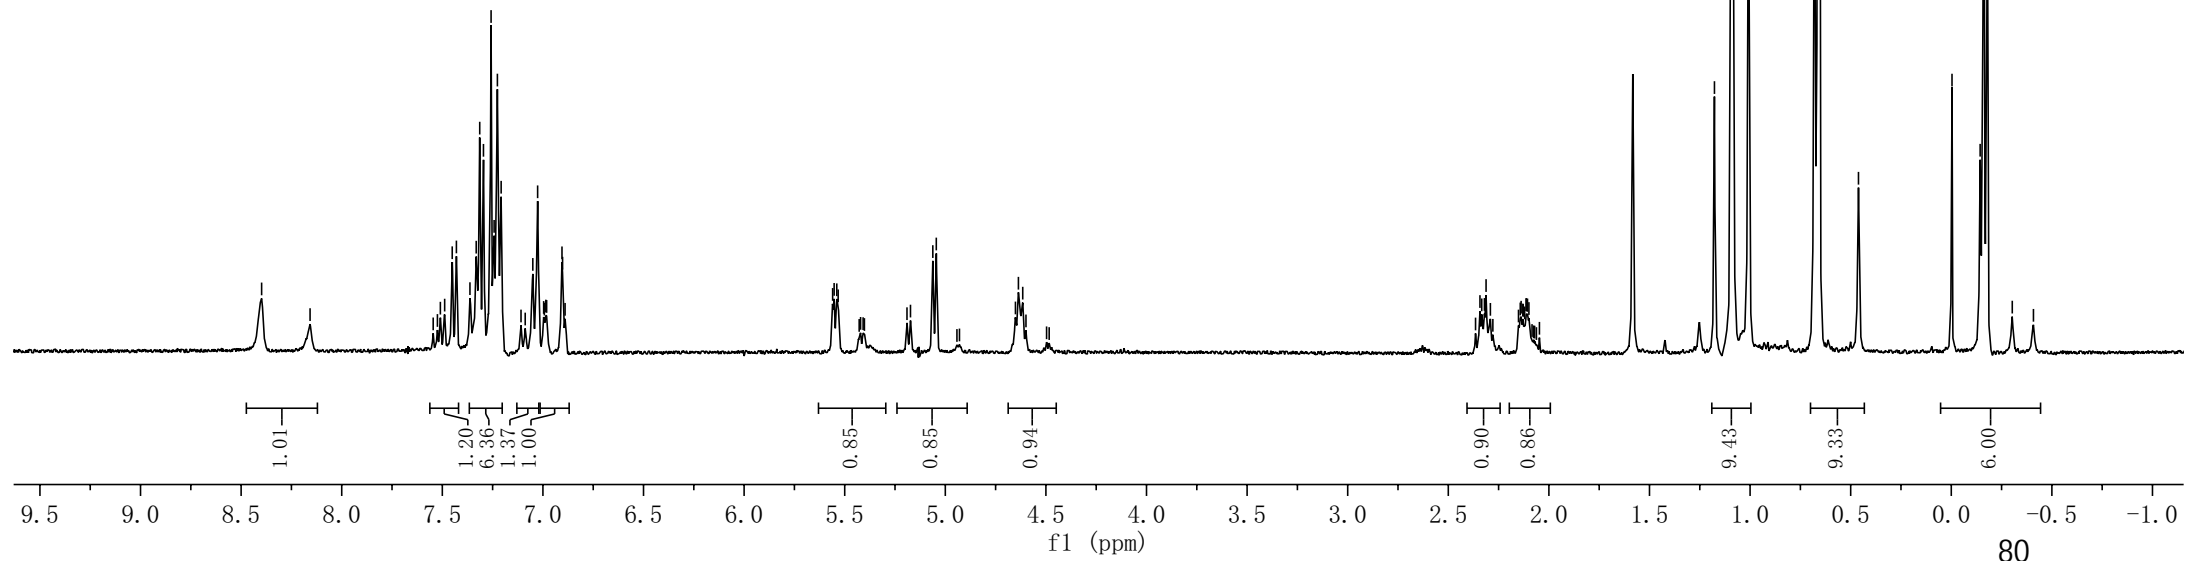



156.169  
154.853  
154.797  
154.353

140.162  
139.824  
138.724  
137.475  
136.870  
128.432  
127.893  
127.815  
127.623  
127.558  
127.382  
126.998  
126.886  
126.717  
124.605  
124.252  
123.368  
122.409  
122.195  
122.127  
121.251  
120.415  
120.151  
119.723  
119.530  
119.452  
118.935  
118.873  
117.752  
111.505  
111.164

79.953  
79.926  
79.493  
72.014  
71.963  
71.425  
66.466  
66.370  
65.023

54.613  
53.579  
53.519  
53.269

40.908  
40.457  
40.124  
39.991

28.238  
28.188  
25.729  
25.679  
25.401

18.013  
17.945  
17.764

-4.800  
-5.050  
-5.223  
-5.506

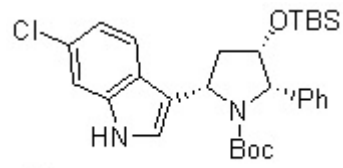

12b (<sup>13</sup>C NMR, 100MHz, CDCl<sub>3</sub>)

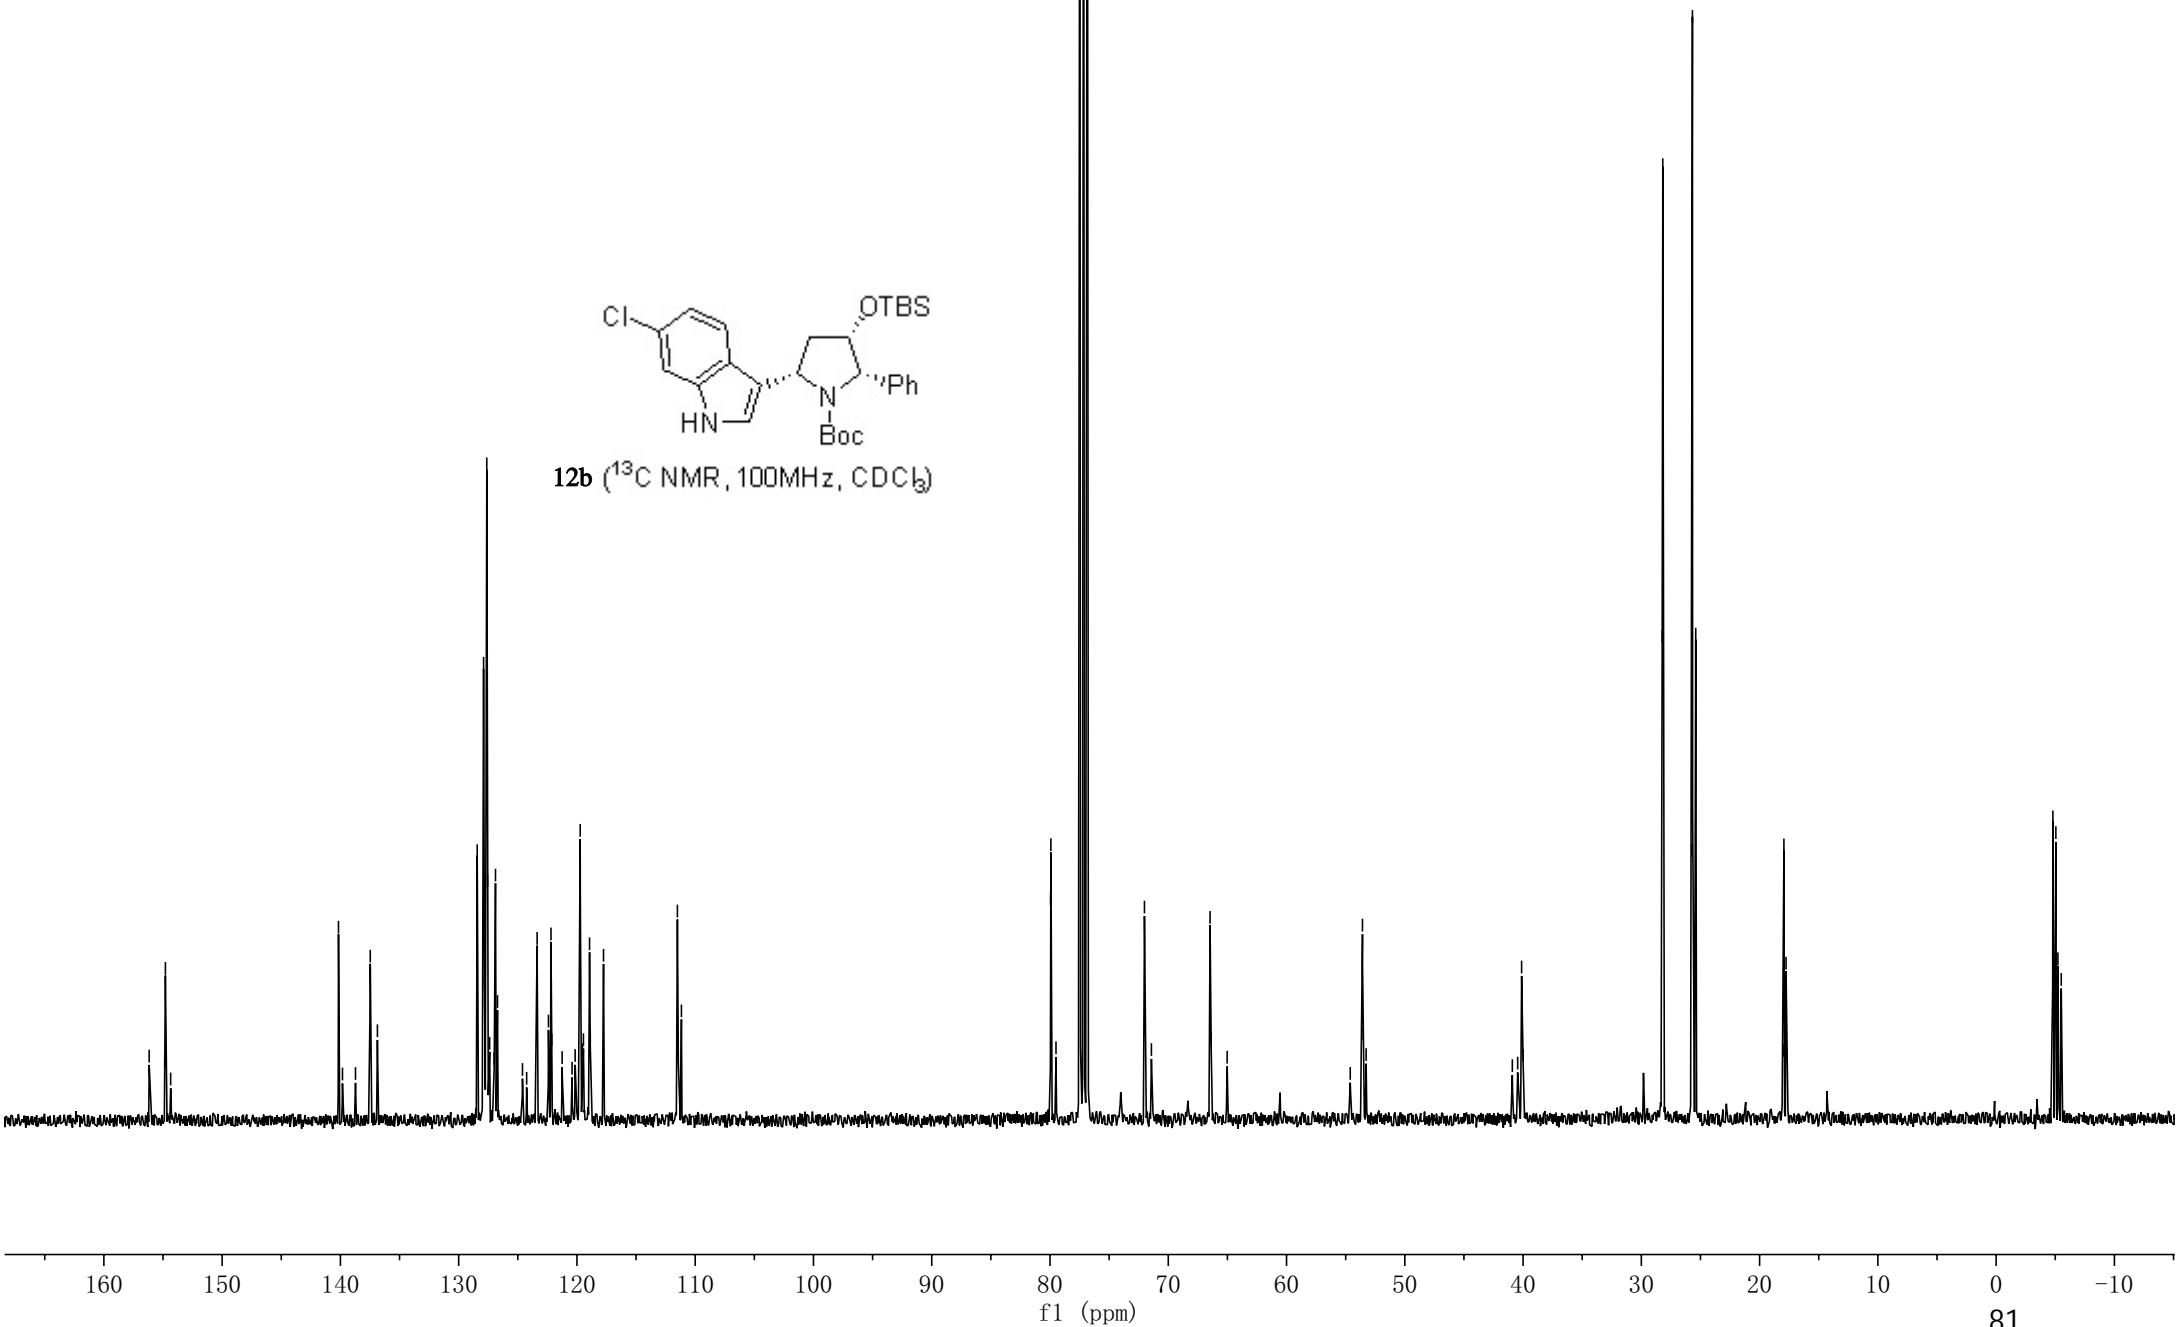



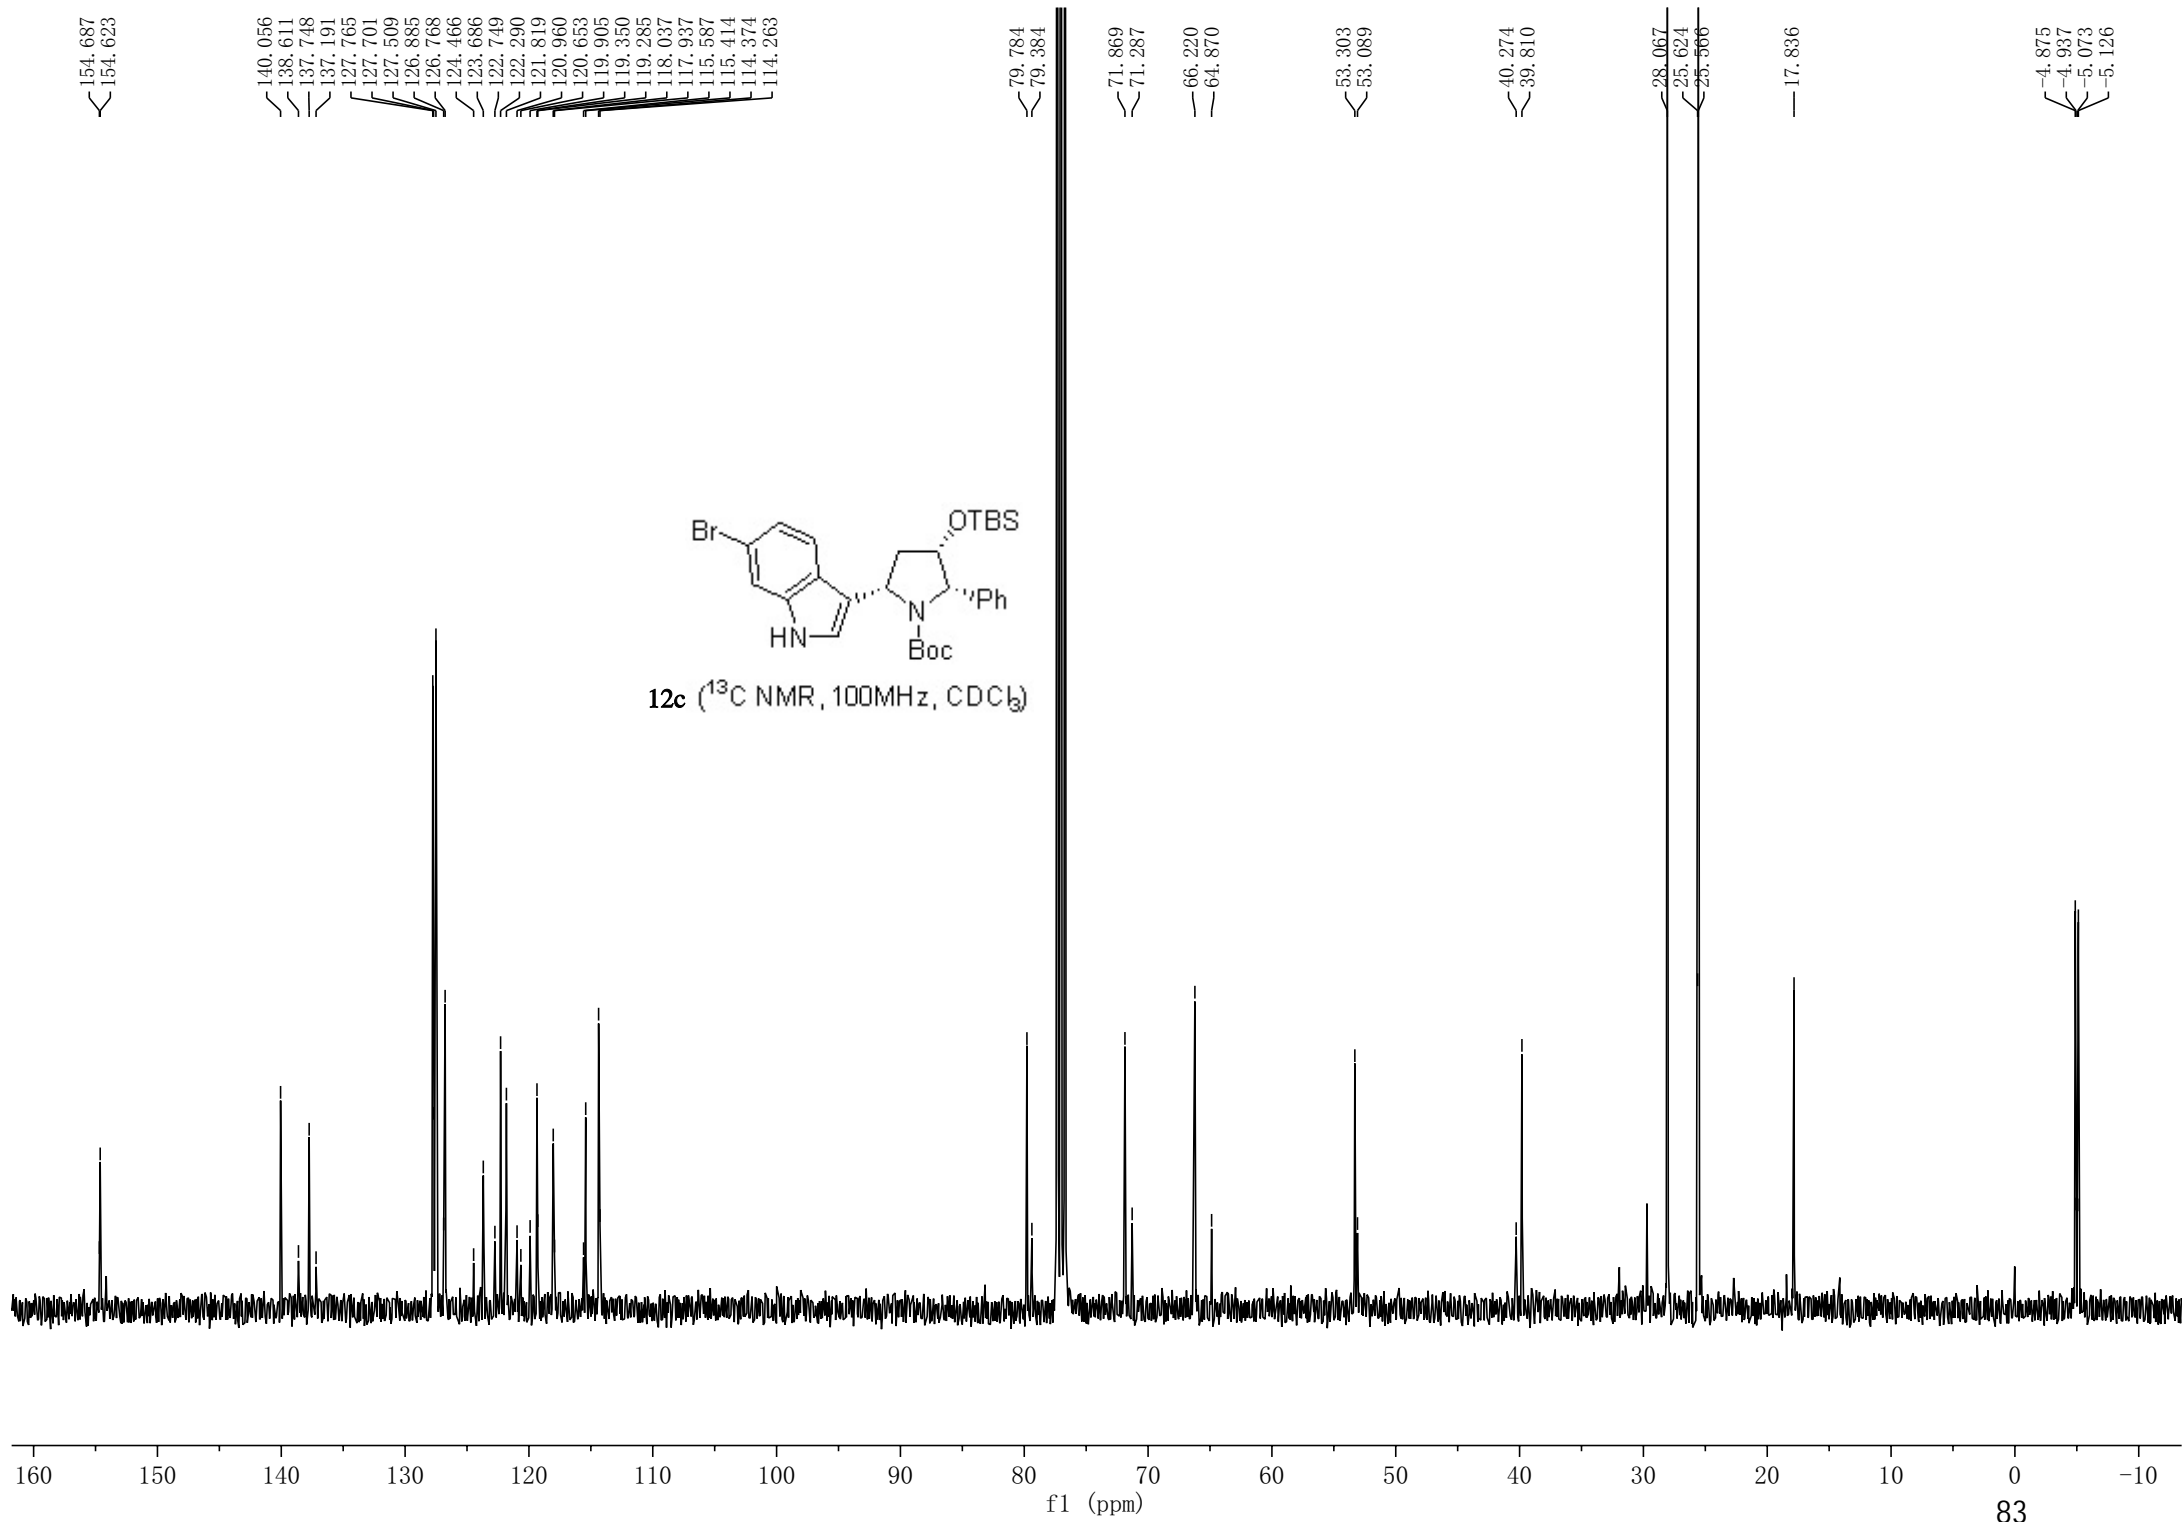

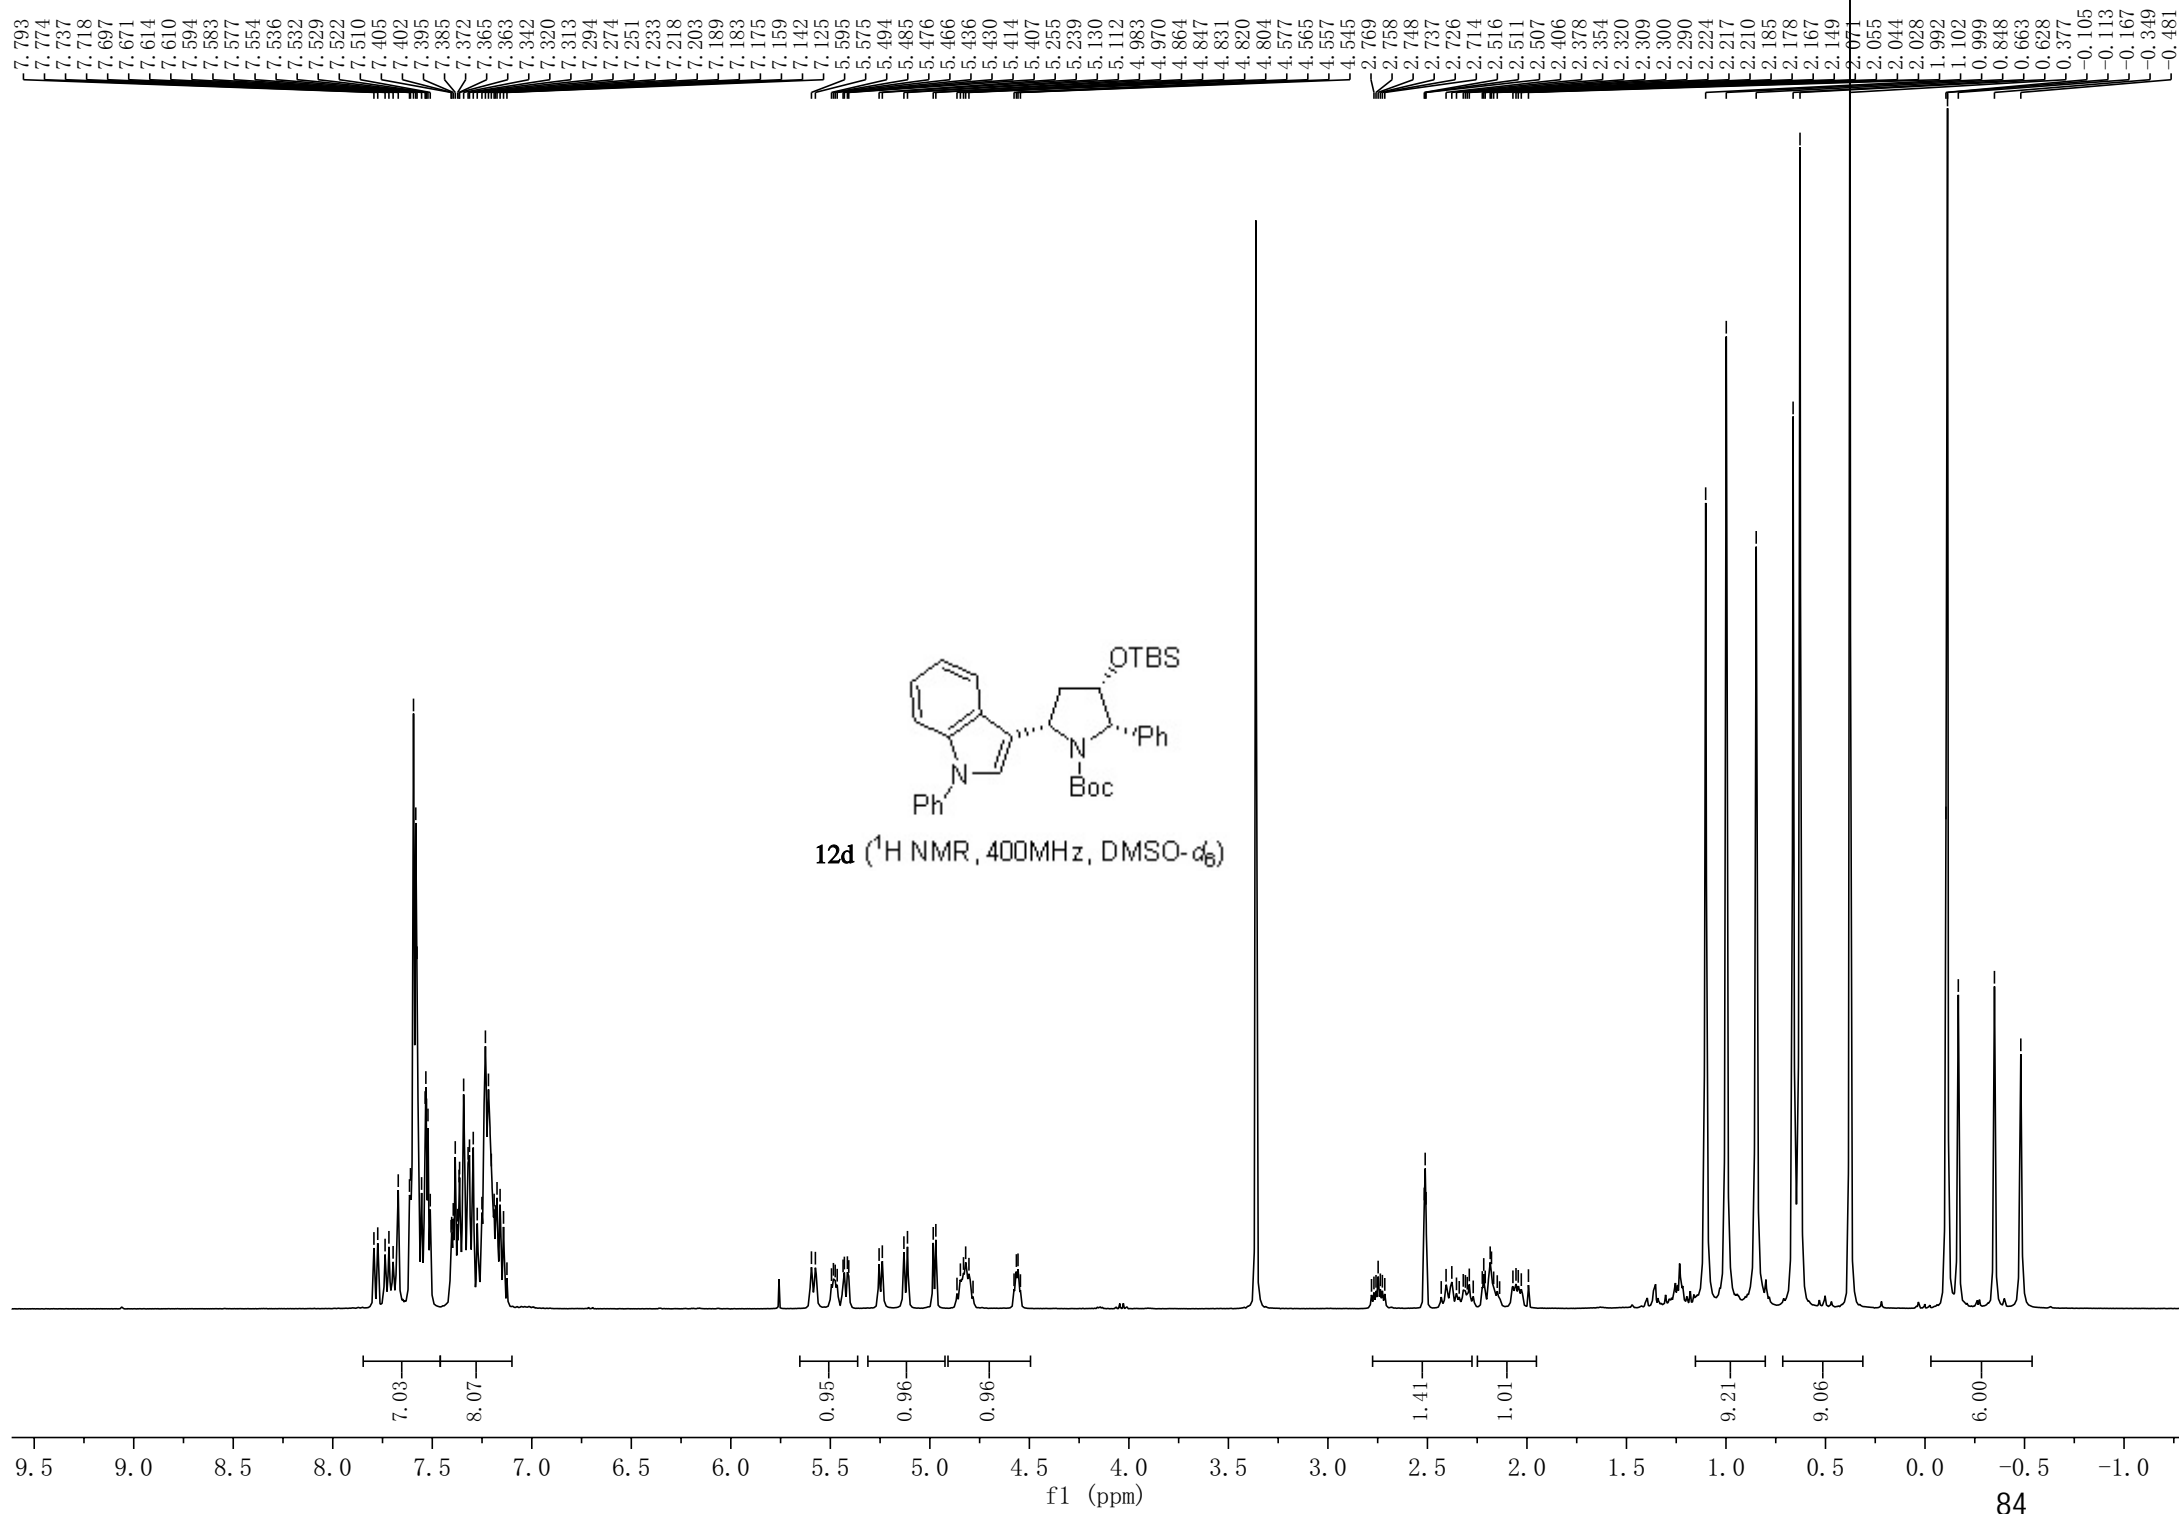

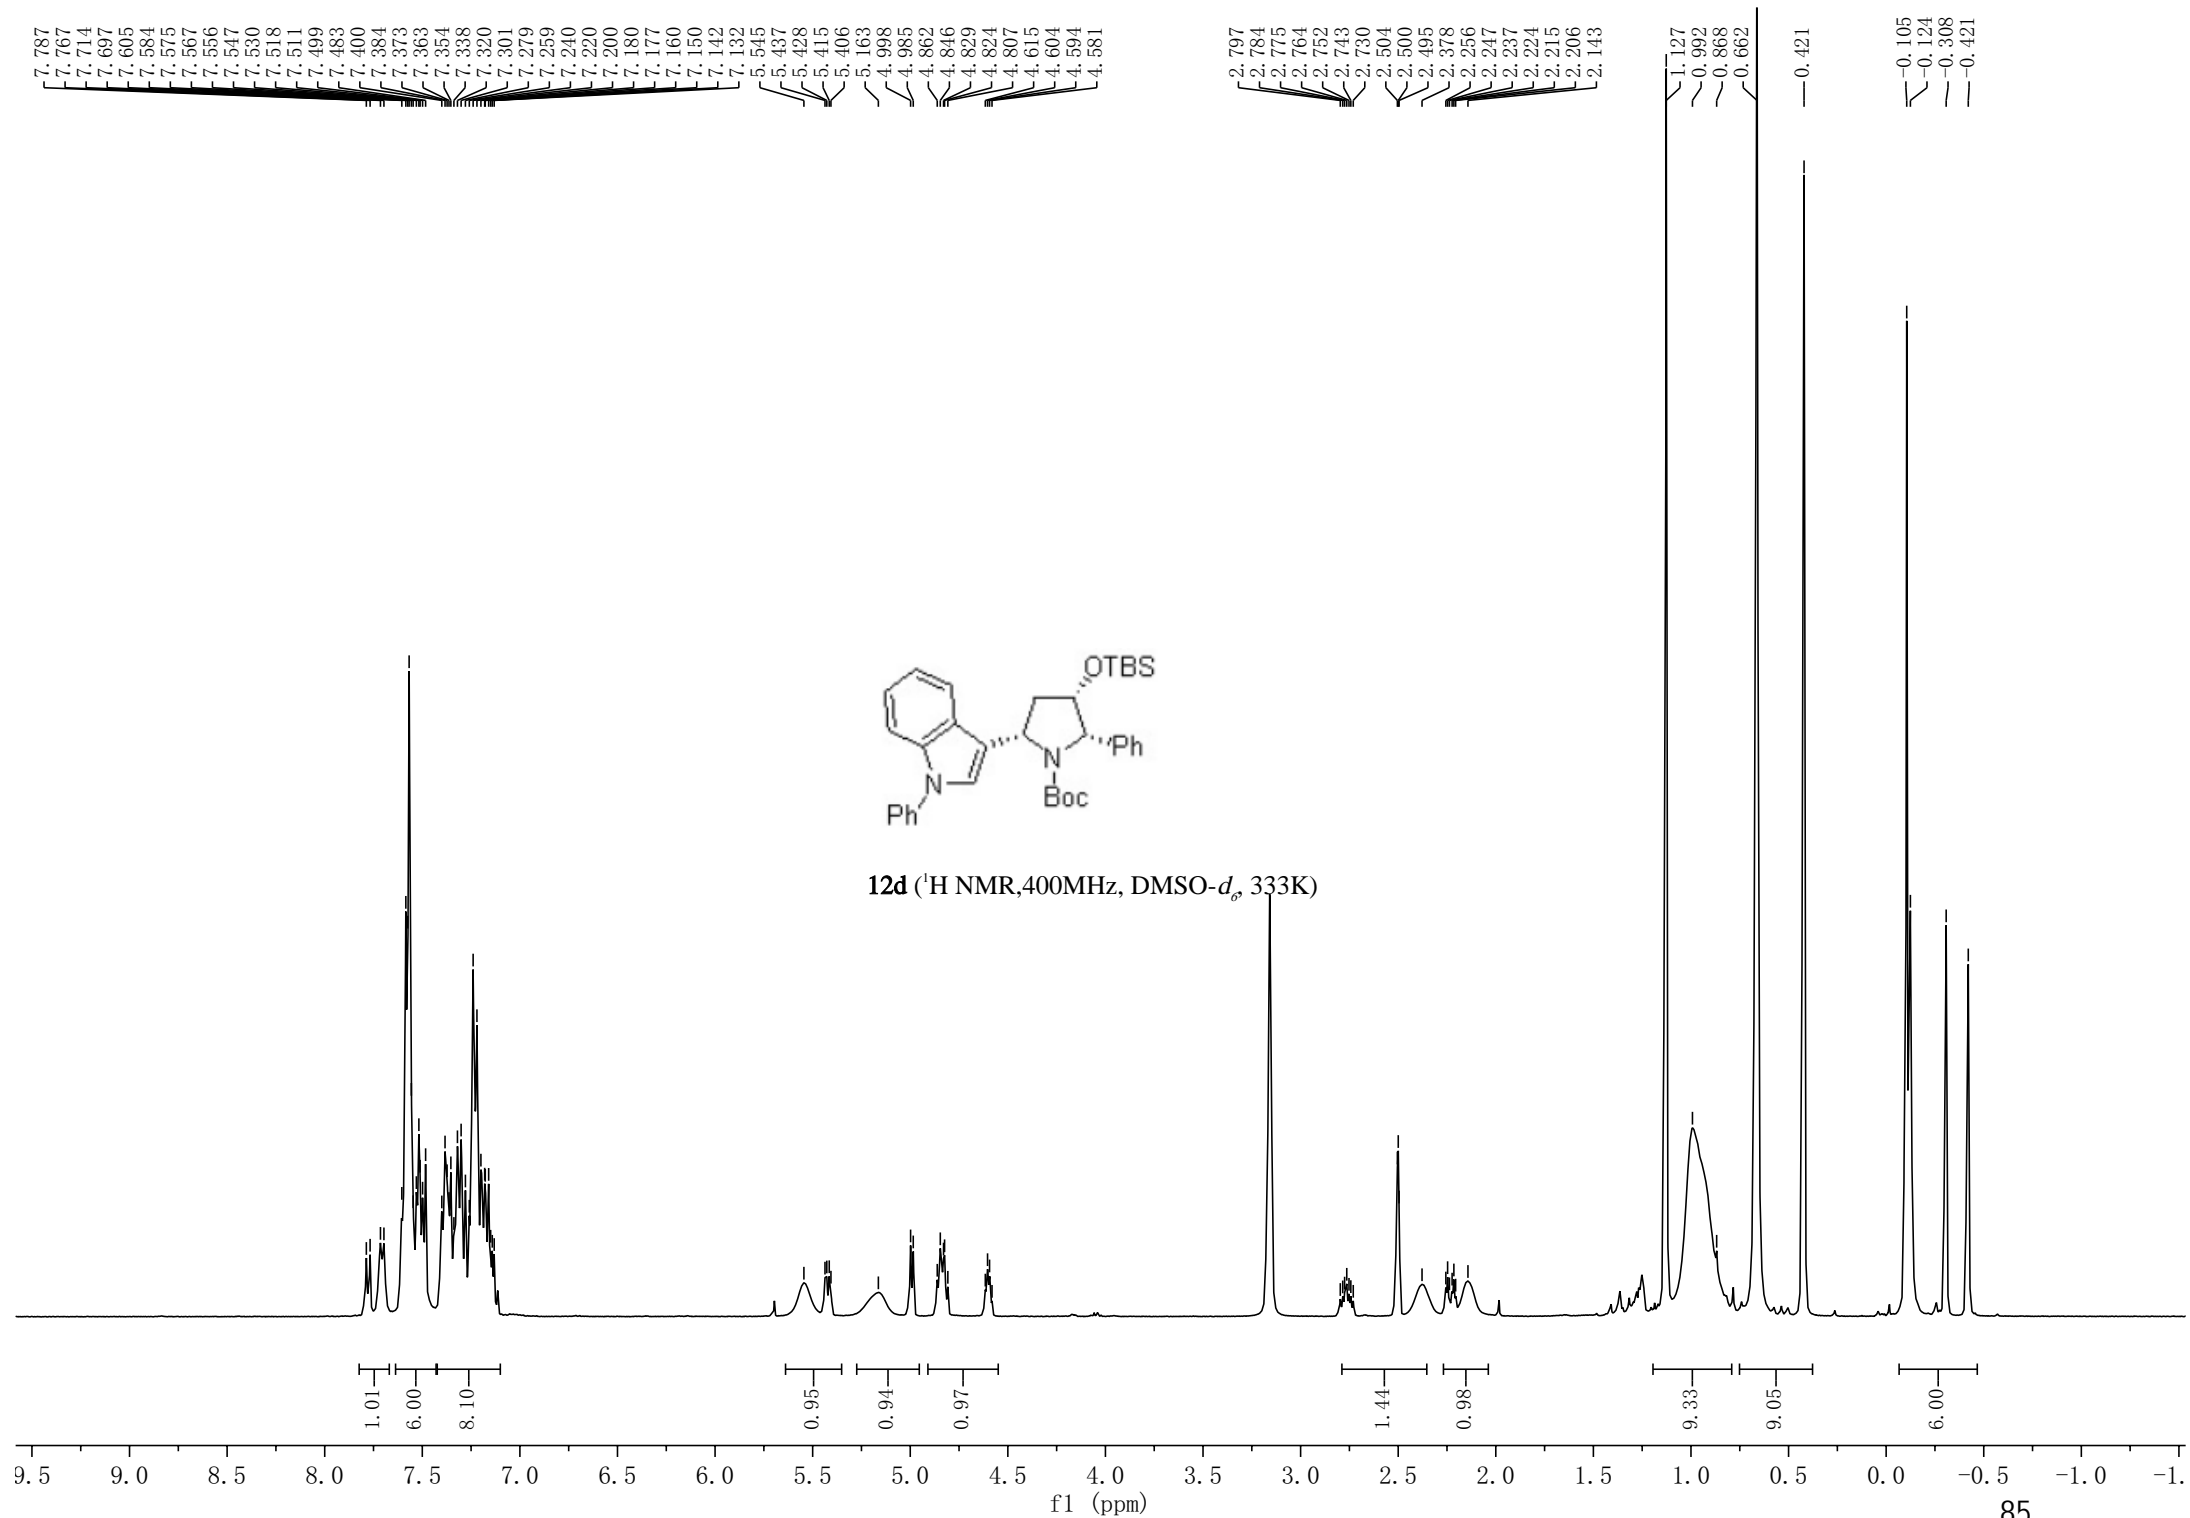

154.902  
153.126  
153.057  
140.590  
140.083  
139.454  
139.250  
139.102  
139.065  
135.338  
135.201  
135.153  
129.867  
129.813  
129.782  
127.843  
127.583  
127.542  
127.466  
127.267  
127.237  
127.121  
126.979  
126.901  
126.400  
126.341  
126.143  
126.090  
125.056  
124.947  
124.306  
123.461  
123.426  
122.456  
122.410  
122.172  
121.153  
120.694  
120.513  
120.016  
119.938  
119.685  
119.470  
119.046  
110.466  
110.423  
110.146  
78.456  
78.135  
77.896  
71.296  
71.071  
64.820  
64.528  
53.960  
52.669  
51.720

27.705  
27.590  
27.501  
25.459  
25.383  
25.092  
17.509  
17.448  
17.244

-4.999  
-5.056  
-5.156  
-5.210  
-5.640  
-5.828

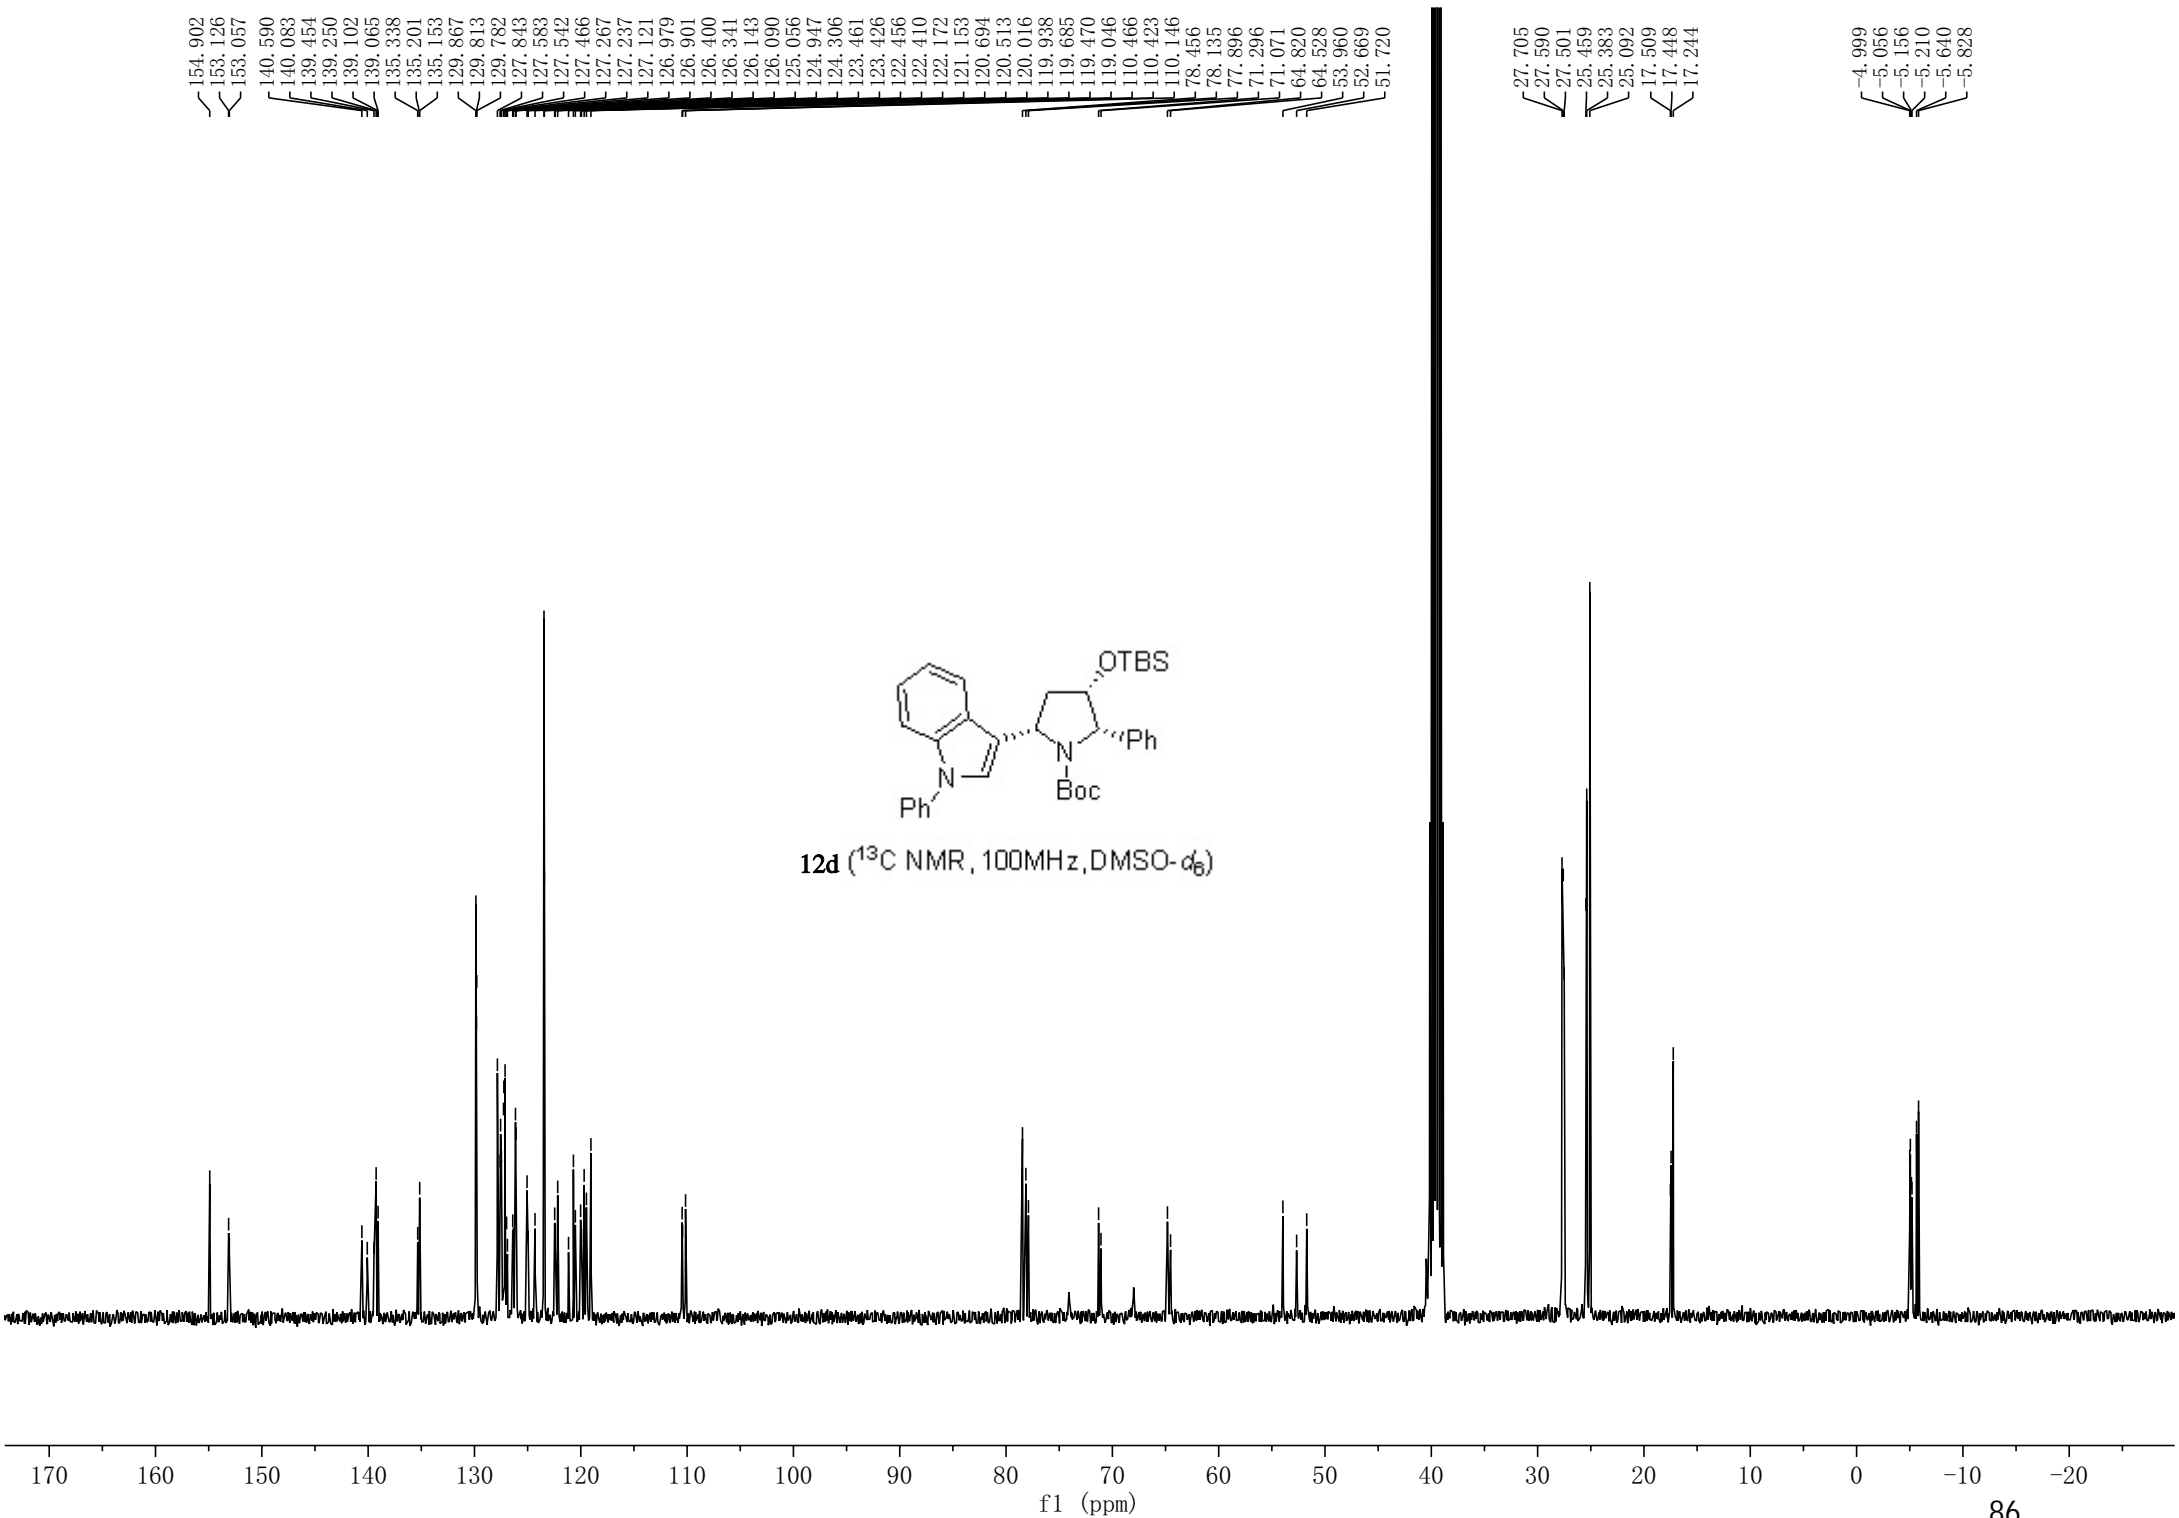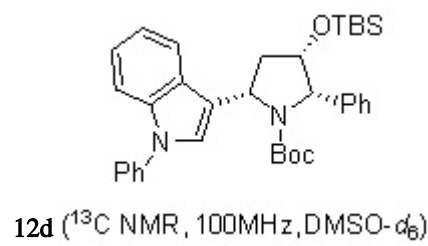

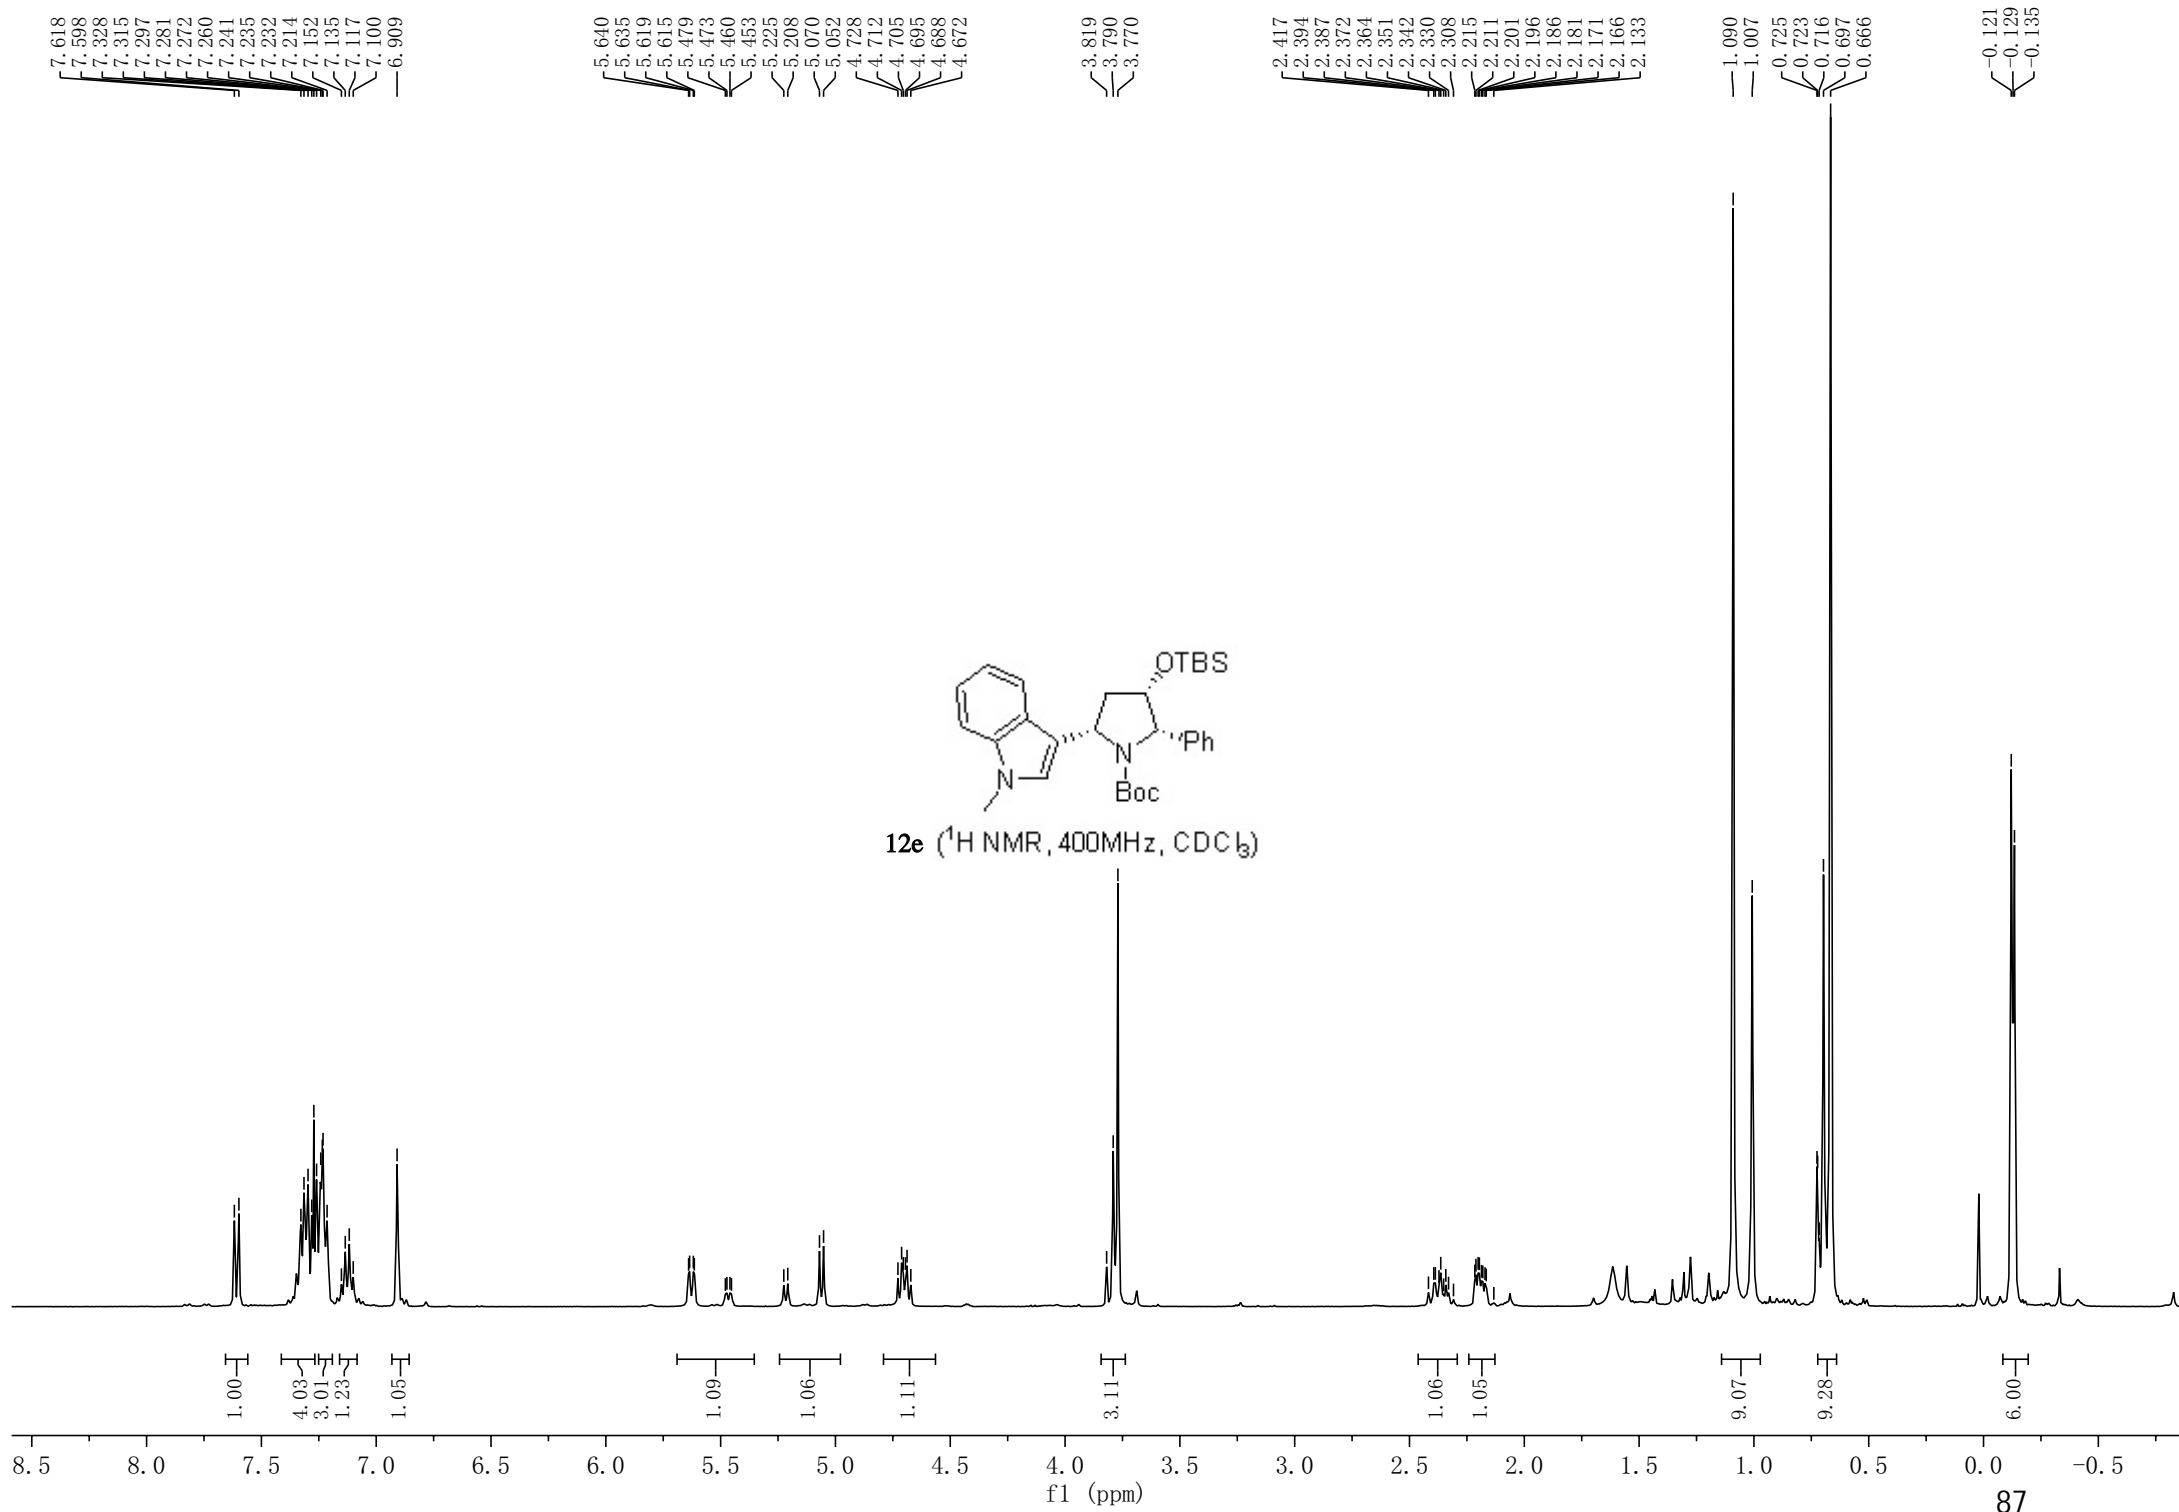

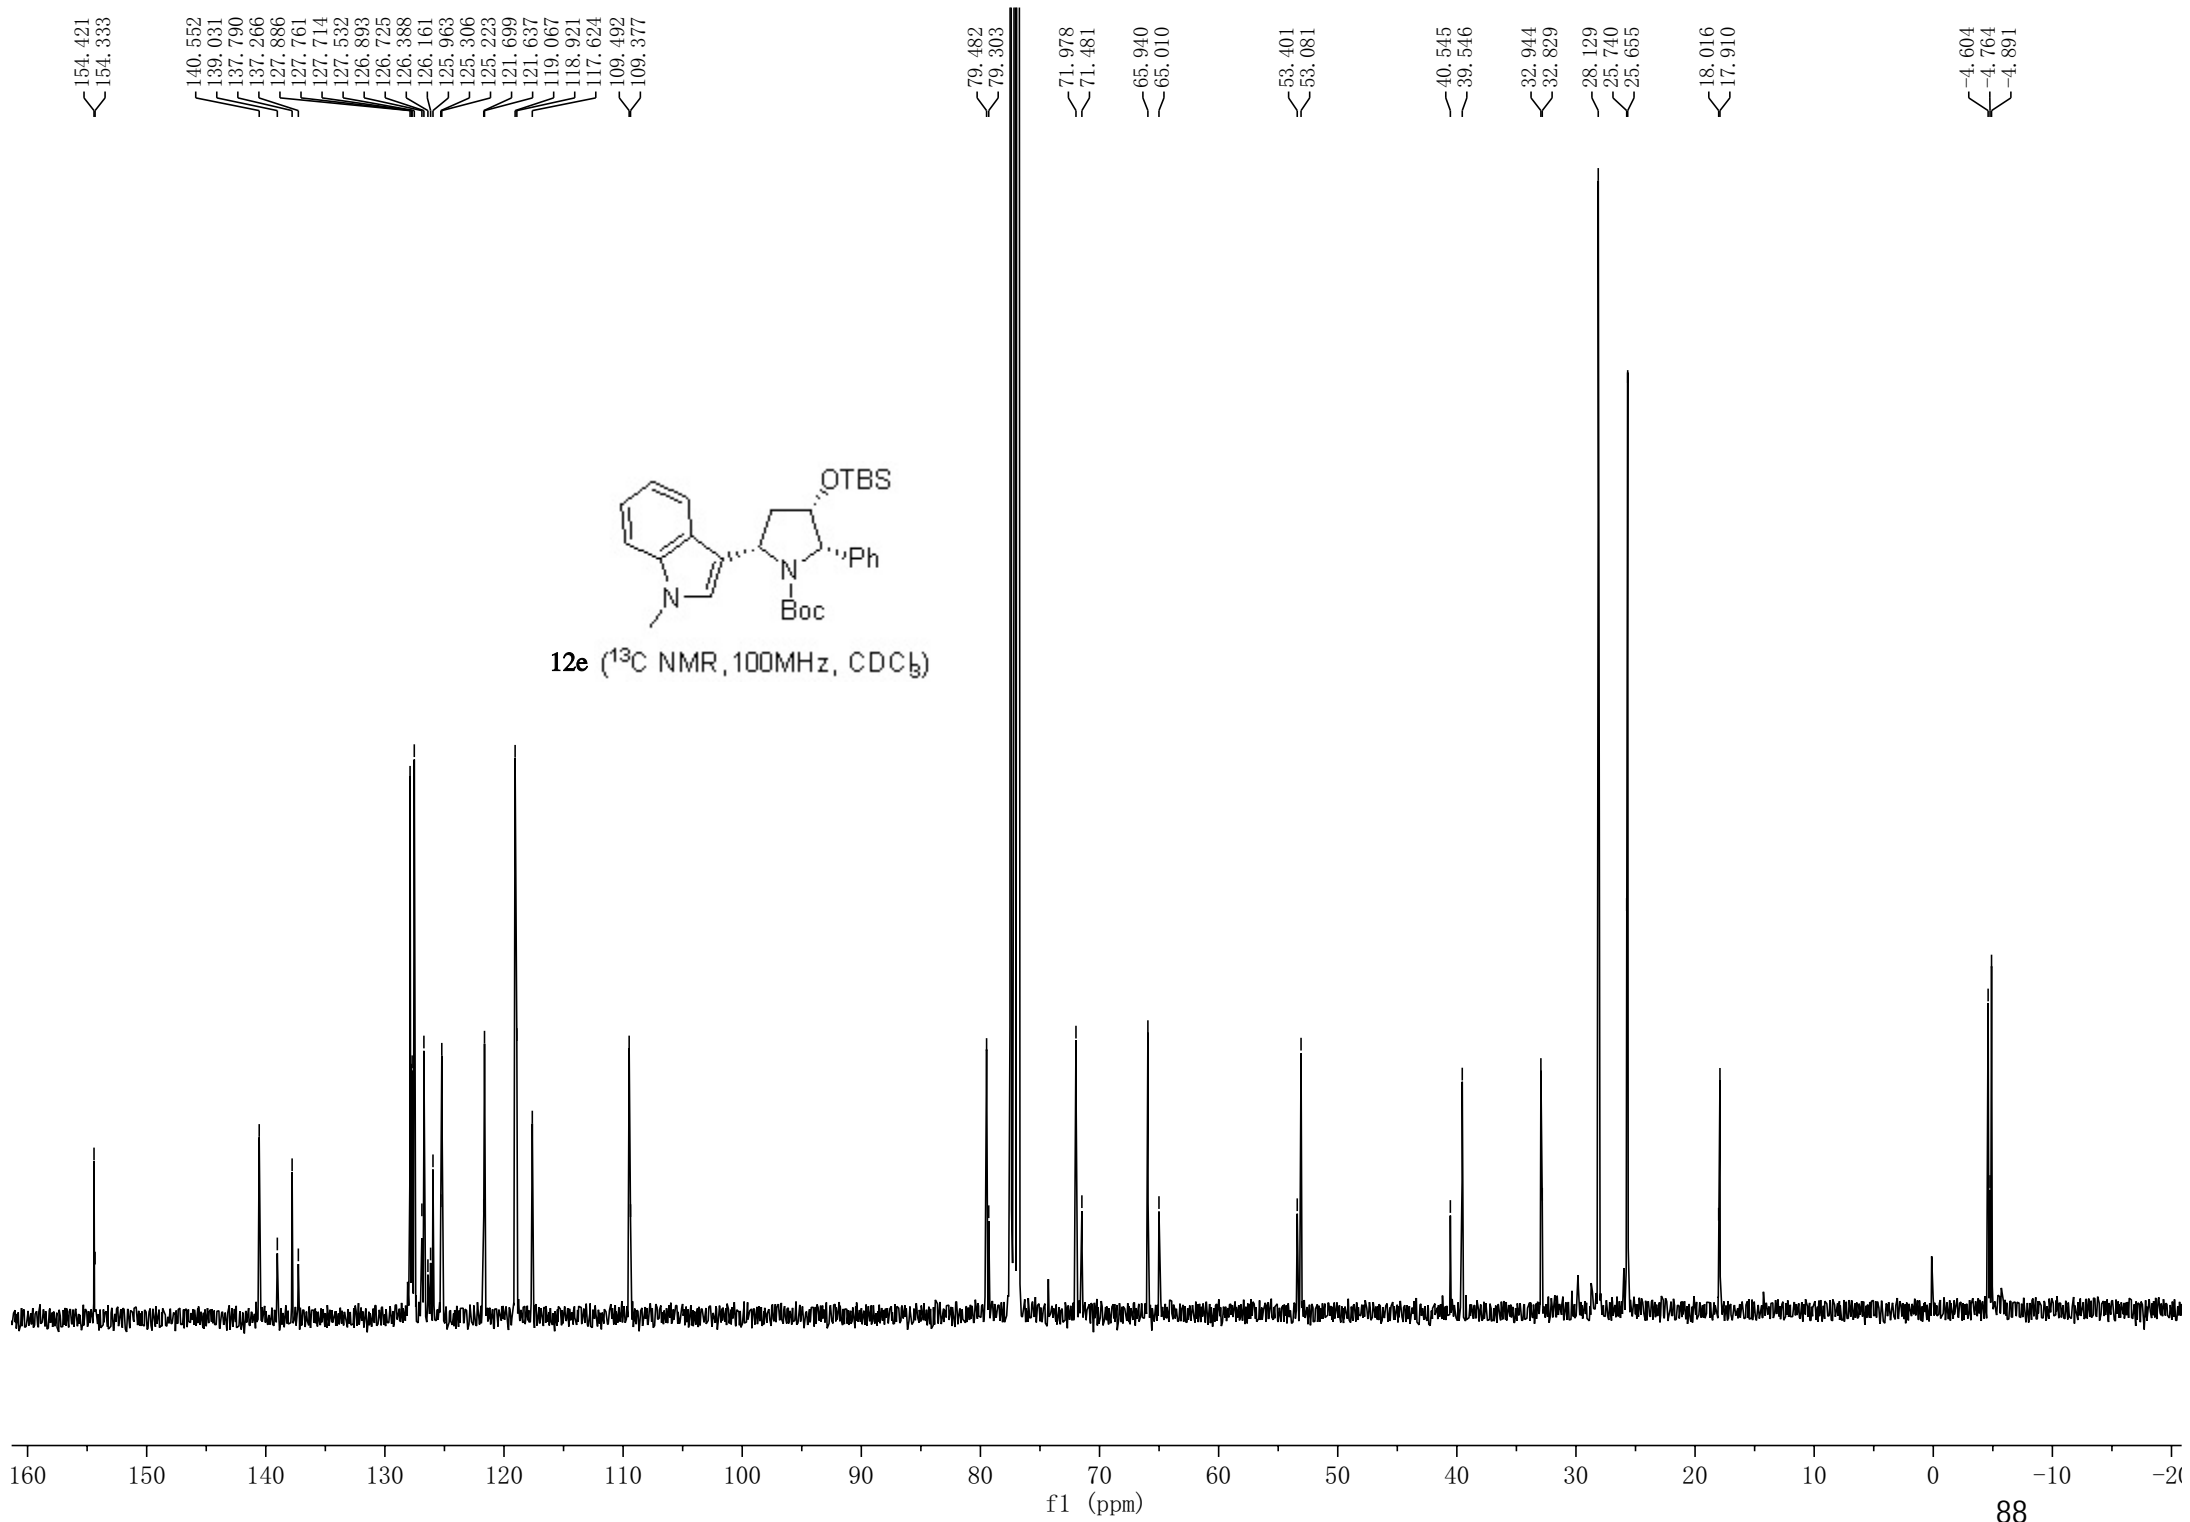



7.705  
7.686  
7.664  
7.645  
7.603  
7.581  
7.558  
7.539  
7.534  
7.517  
7.394  
7.378  
7.366  
7.361  
7.288  
7.278  
7.260  
7.242  
7.226  
7.225  
7.207  
7.189  
7.171  
5.313  
4.695  
4.496  
4.479  
4.473  
4.462  
4.456  
4.439  
4.302  
4.286  
4.275  
4.210  
4.193  
4.175  
4.157  
2.800  
2.782  
2.768  
2.753  
2.735  
2.450  
2.428  
2.420  
2.398  
2.374  
2.177  
2.155  
2.125  
2.101  
2.033  
2.017  
2.001  
1.984  
1.967  
1.951  
1.935  
1.803  
1.781  
1.768  
1.761  
1.747  
1.734  
1.727  
1.714  
1.665  
1.552  
1.495  
1.474  
1.457  
1.447  
1.419  
1.396  
1.376  
1.359  
1.336  
1.318  
1.300  
1.099  
0.855  
1.068  
1.055  
0.966  
0.955  
0.942  
0.935  
0.900  
0.149  
0.094  
0.074

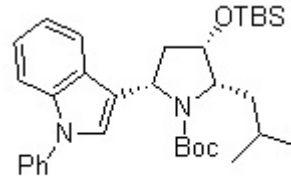

12f (<sup>1</sup>H NMR, 400MHz, CDCl<sub>3</sub>)

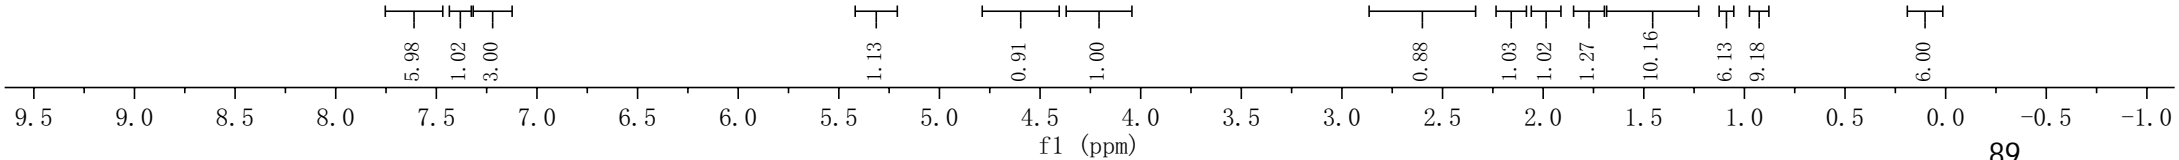

155.594  
154.378

140.097  
139.909  
136.527  
136.156  
129.647  
127.303  
127.212  
126.183  
124.266  
123.747  
122.529  
122.375  
120.124  
119.889  
119.479  
119.240  
110.677  
110.634

79.538  
78.805

71.652  
70.866

58.852

53.480  
52.444

40.630  
38.916  
28.745  
28.592  
28.191  
25.925  
25.821  
25.541  
24.858  
23.673  
22.808  
22.662  
18.154  
18.070

-4.484  
-4.568  
-4.802  
-4.889

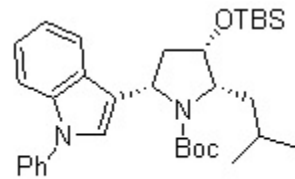

12f (<sup>13</sup>C NMR, 100MHz, CDCl<sub>3</sub>)

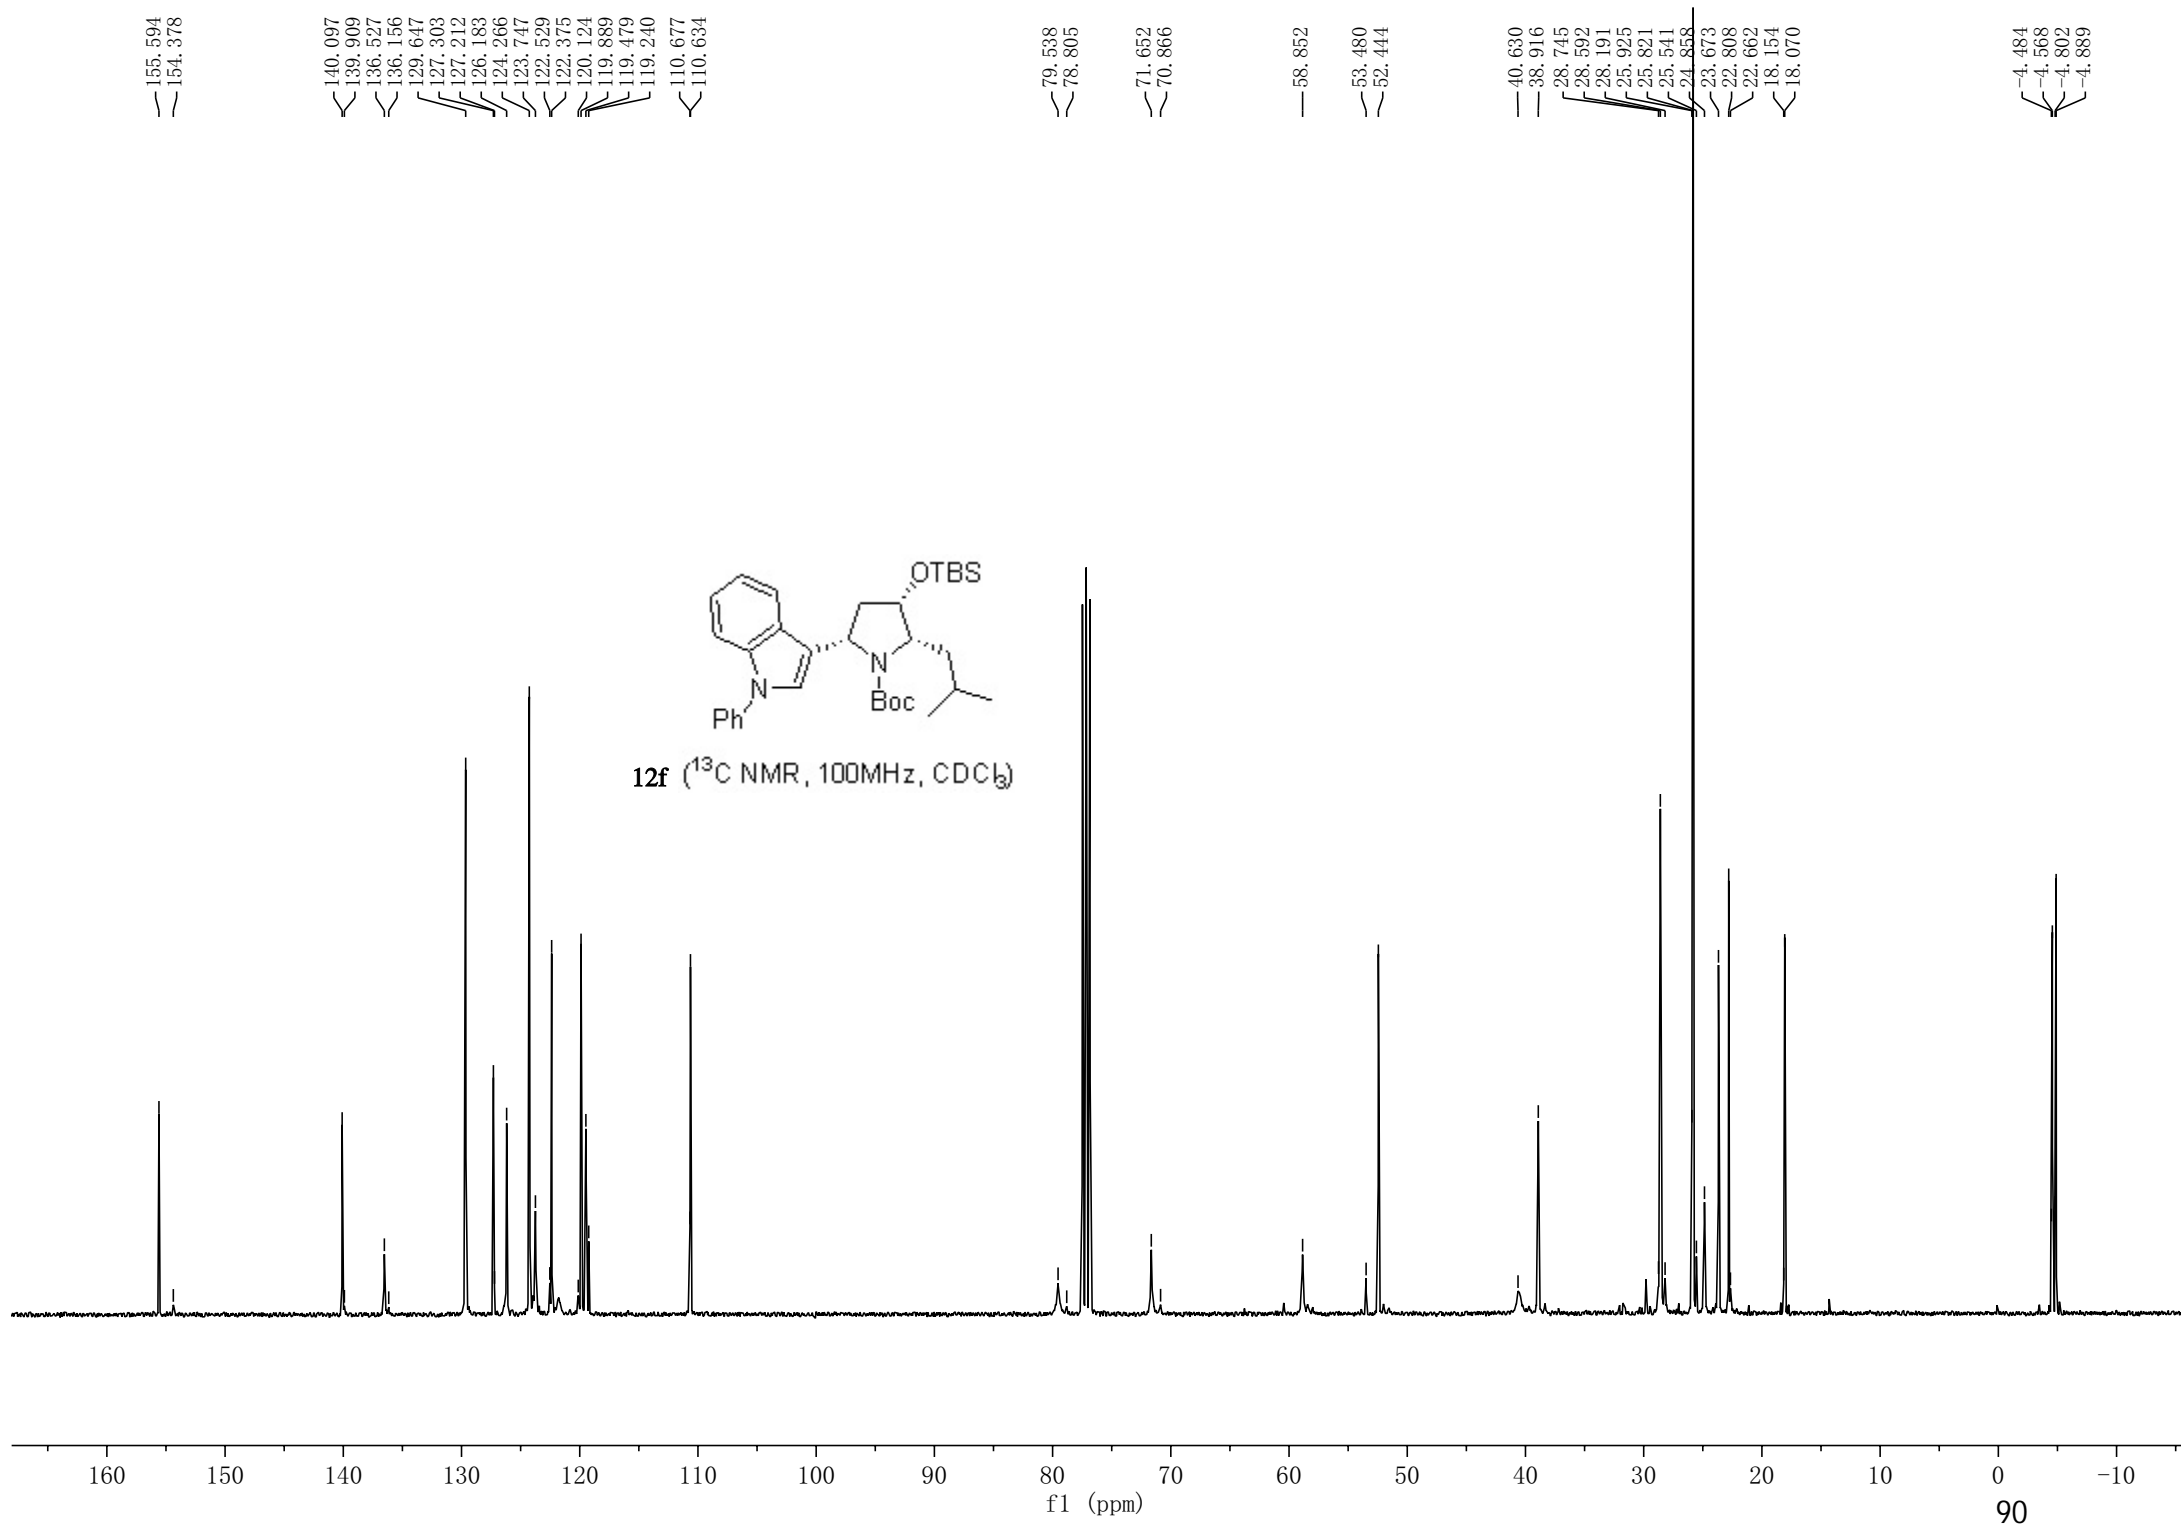

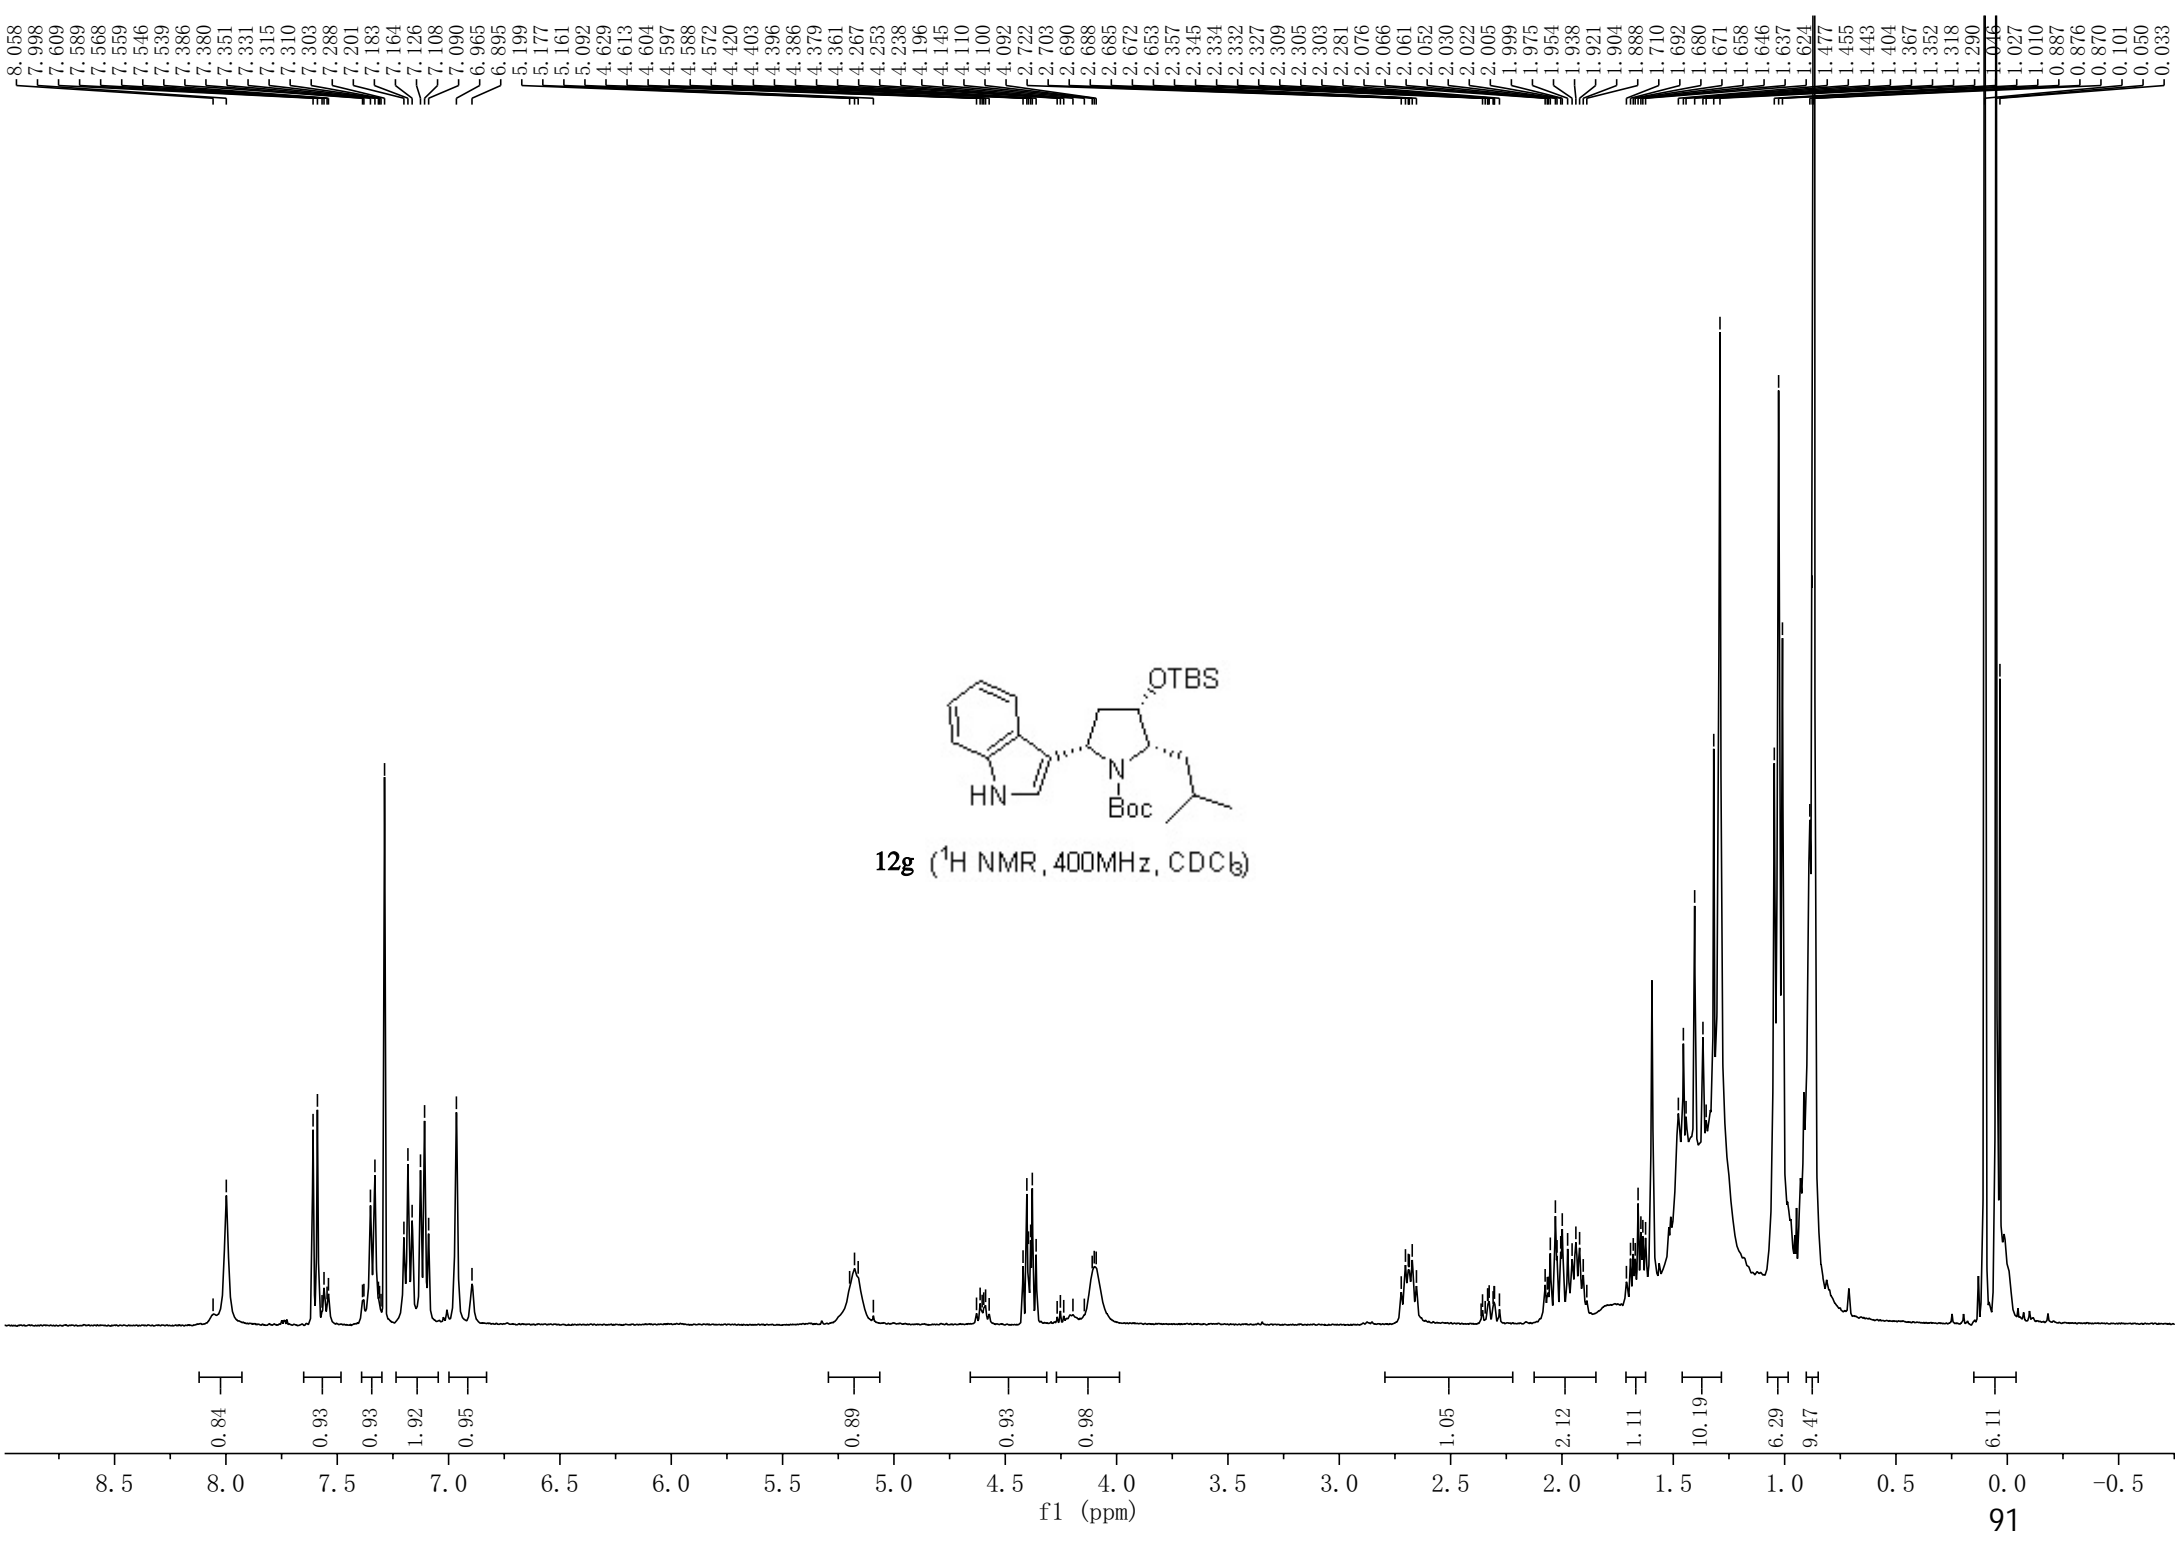

— 155.669

— 136.750

— 125.777

— 121.831

— 120.011

— 119.304

— 119.151

— 119.051

— 118.763

— 111.268

— 79.516

— 71.558

— 58.647

— 58.174

— 52.460

— 38.941

— 28.591

— 25.922

— 25.849

— 24.818

— 23.750

— 22.787

— 18.109

— 4.529

— 4.577

— 4.858

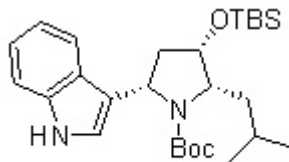

12g (<sup>13</sup>C NMR, 100MHz, CDCl<sub>3</sub>)

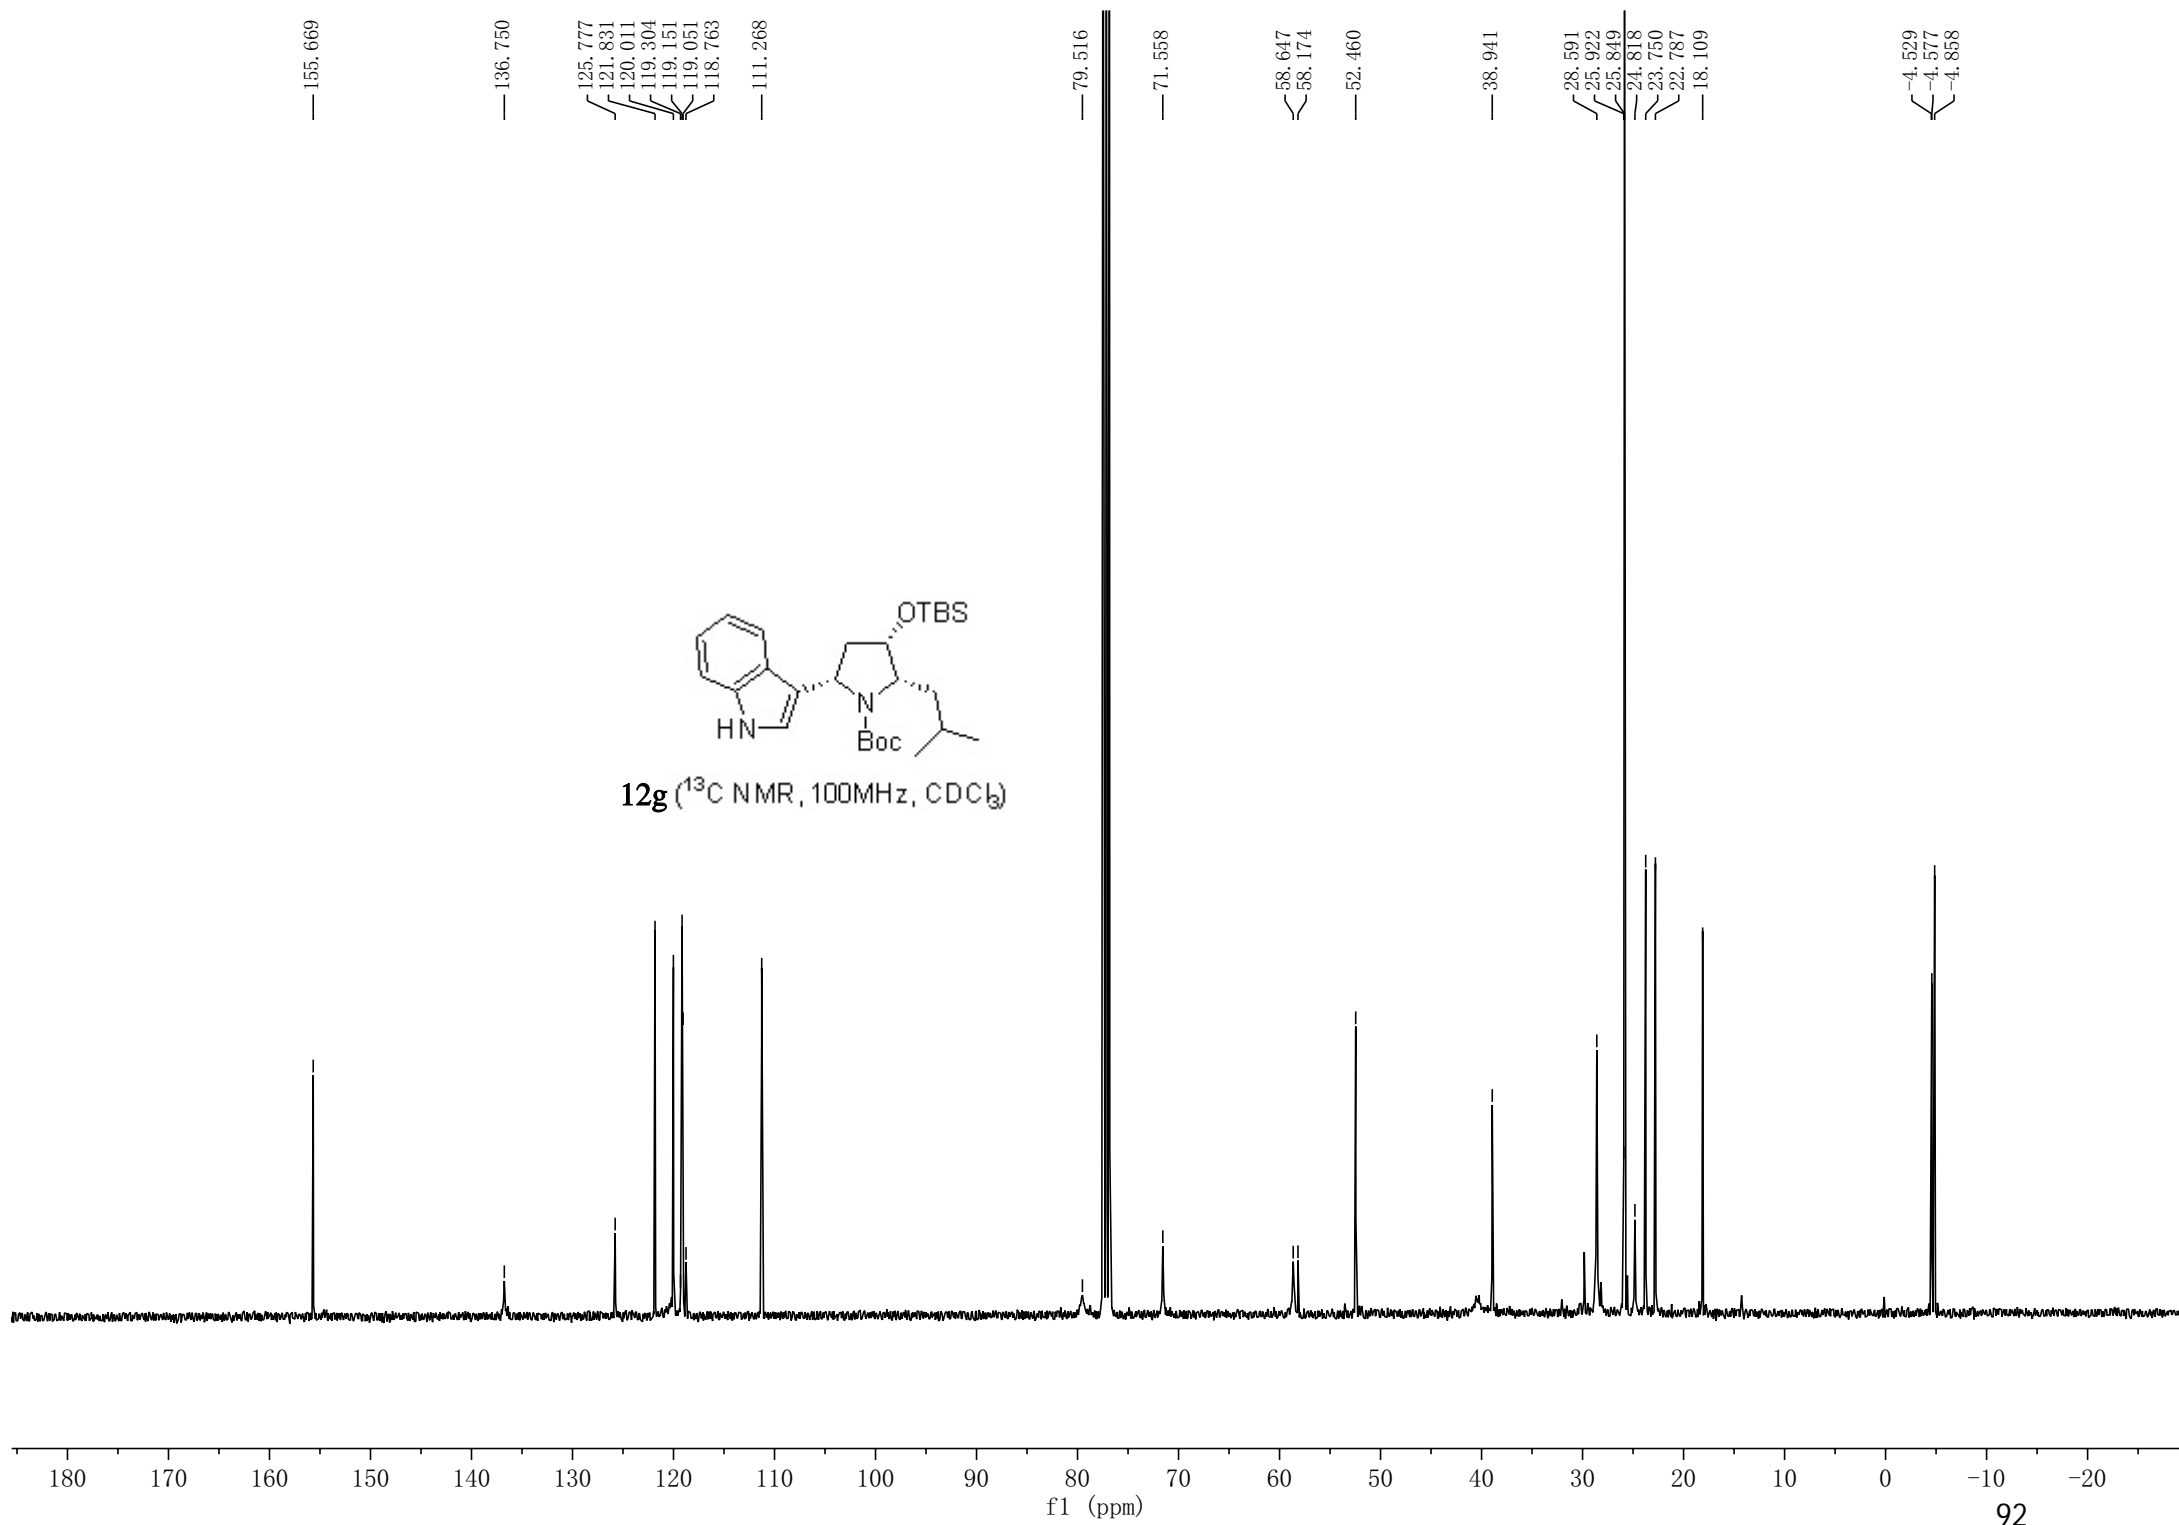

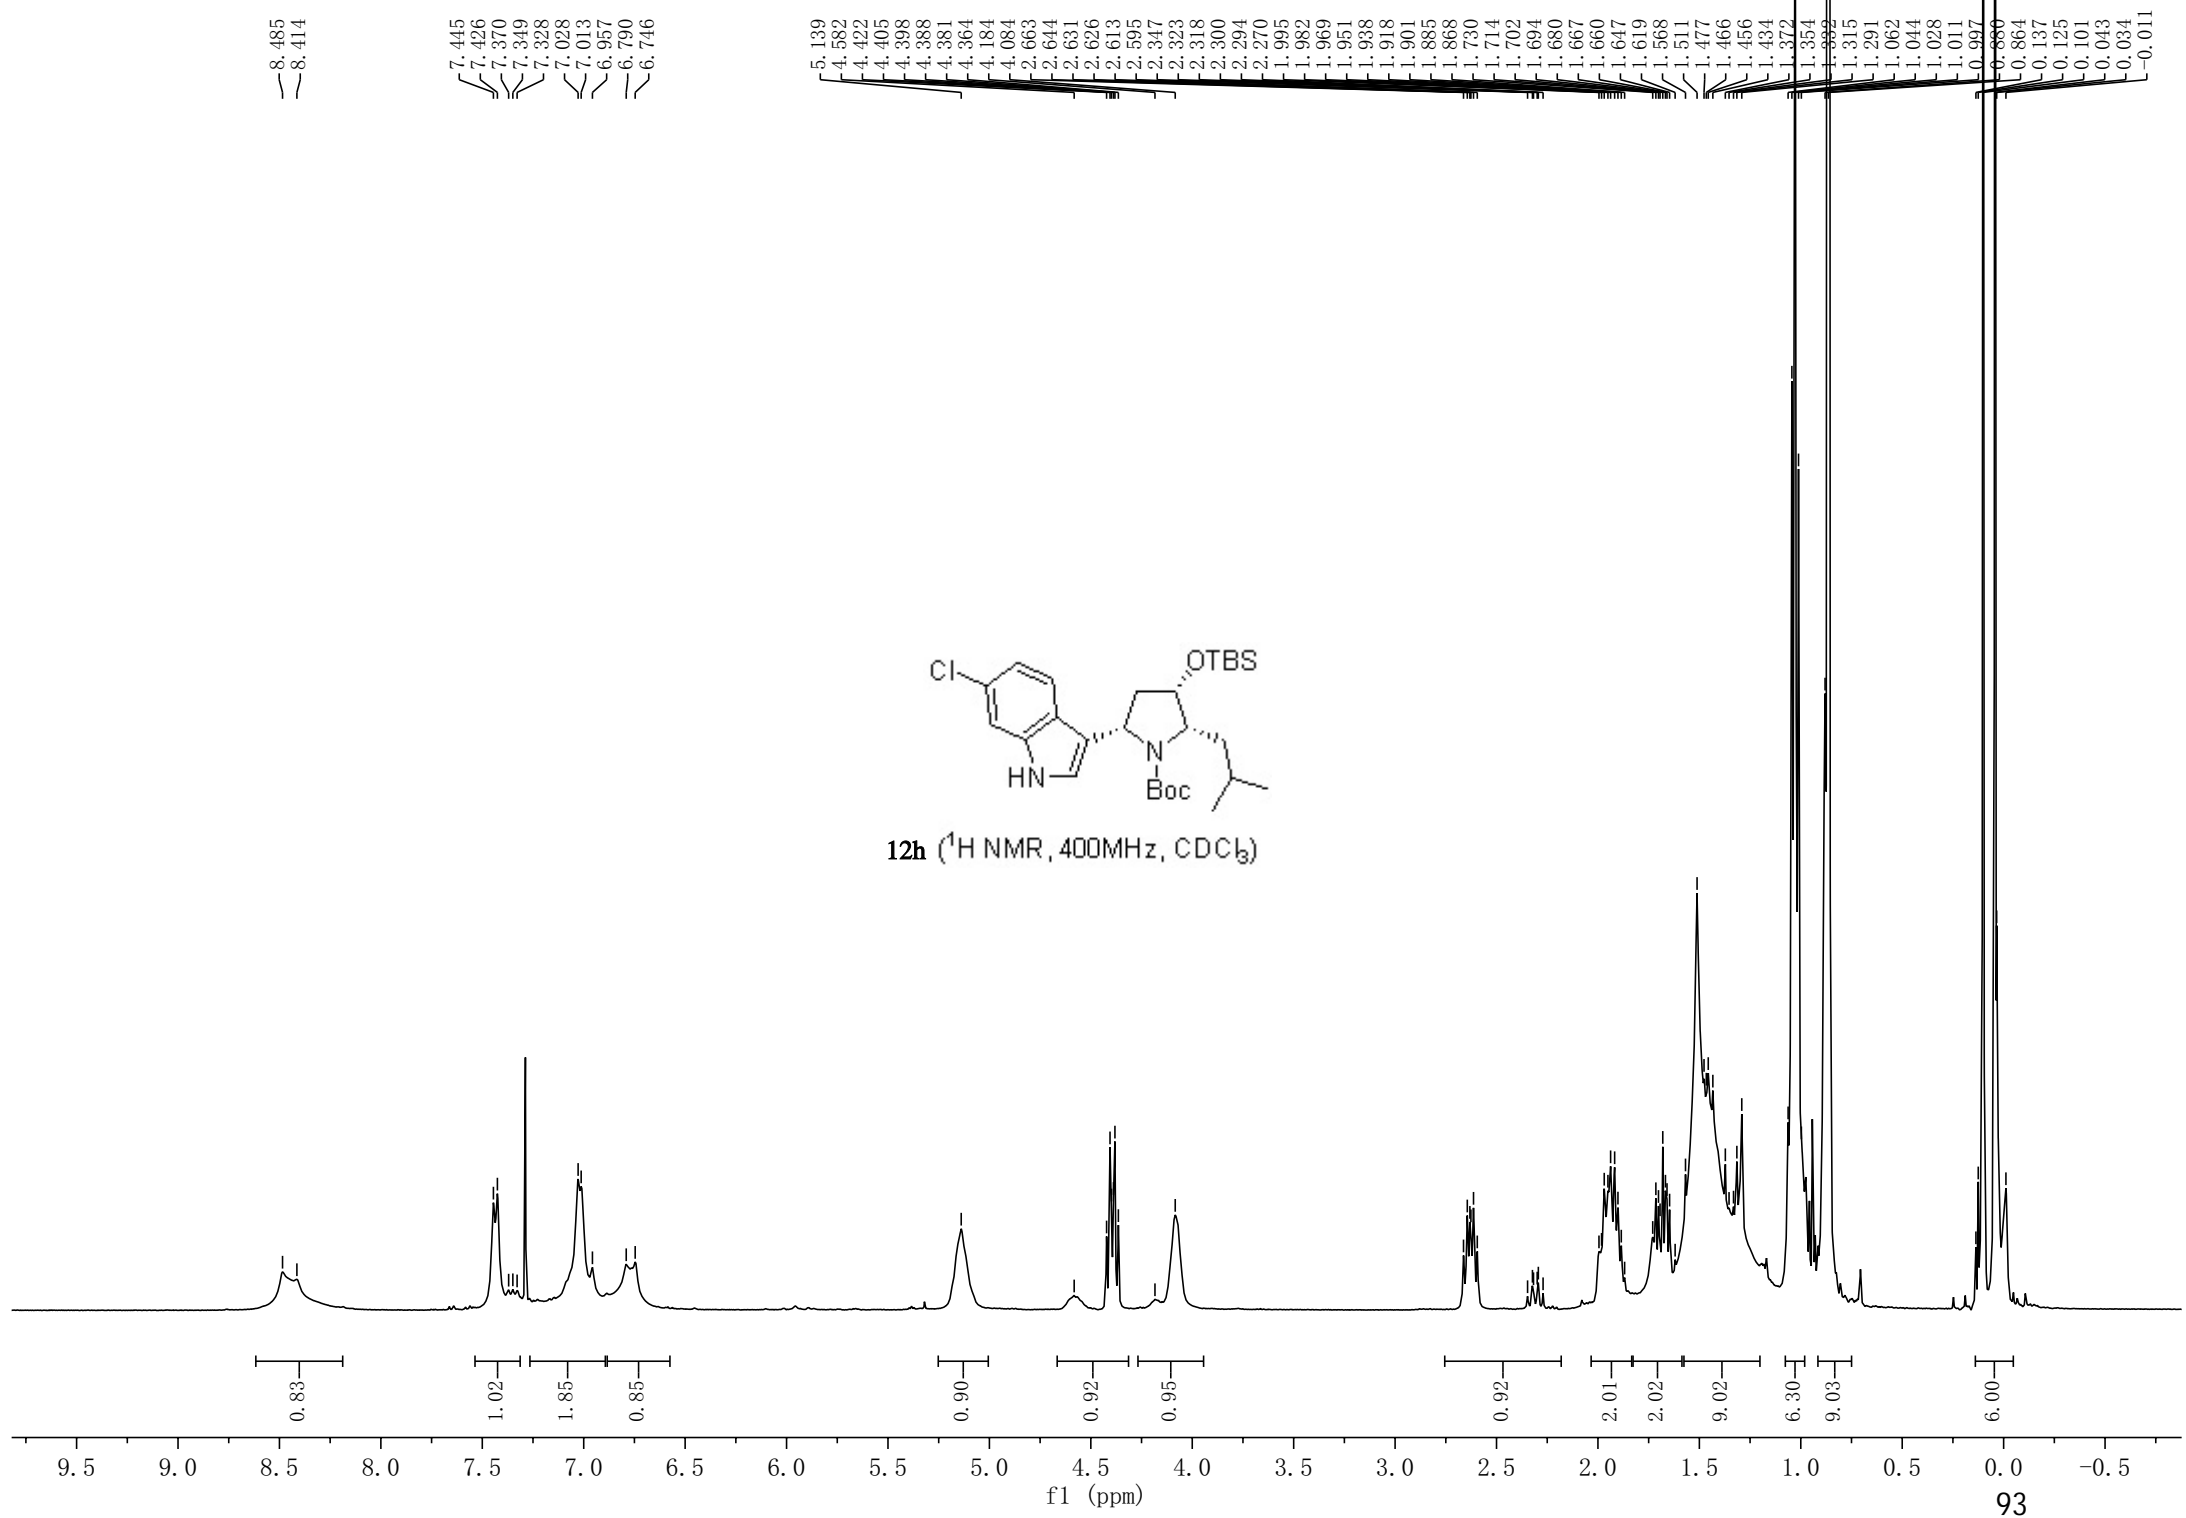

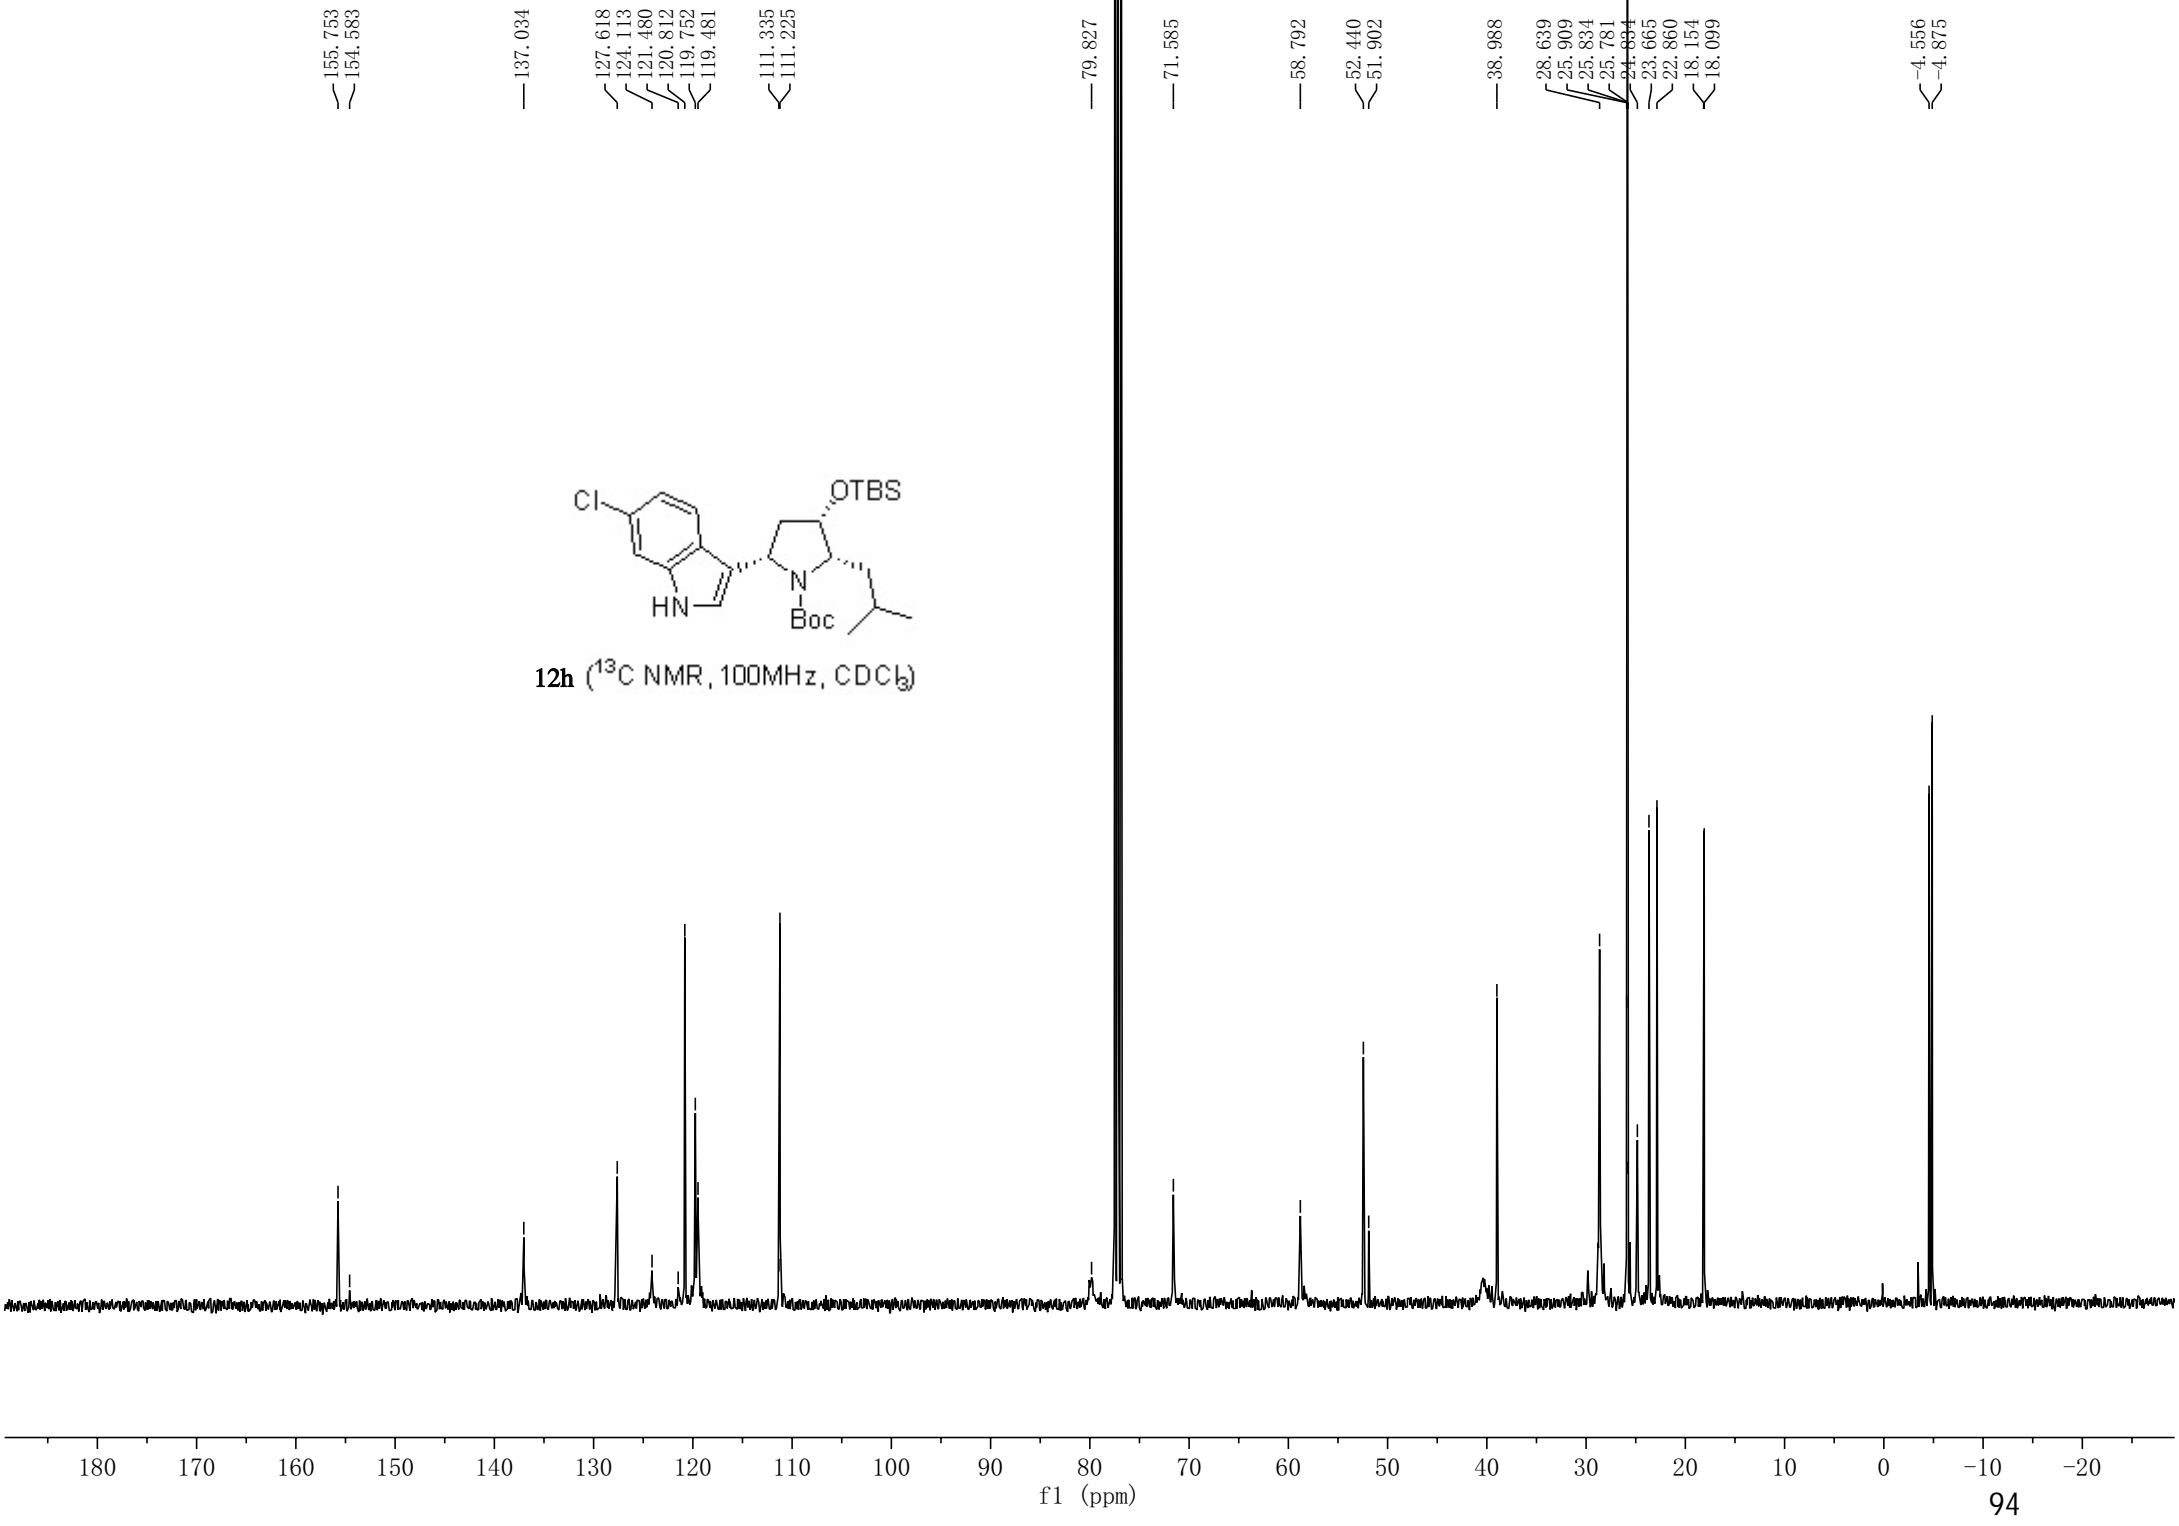

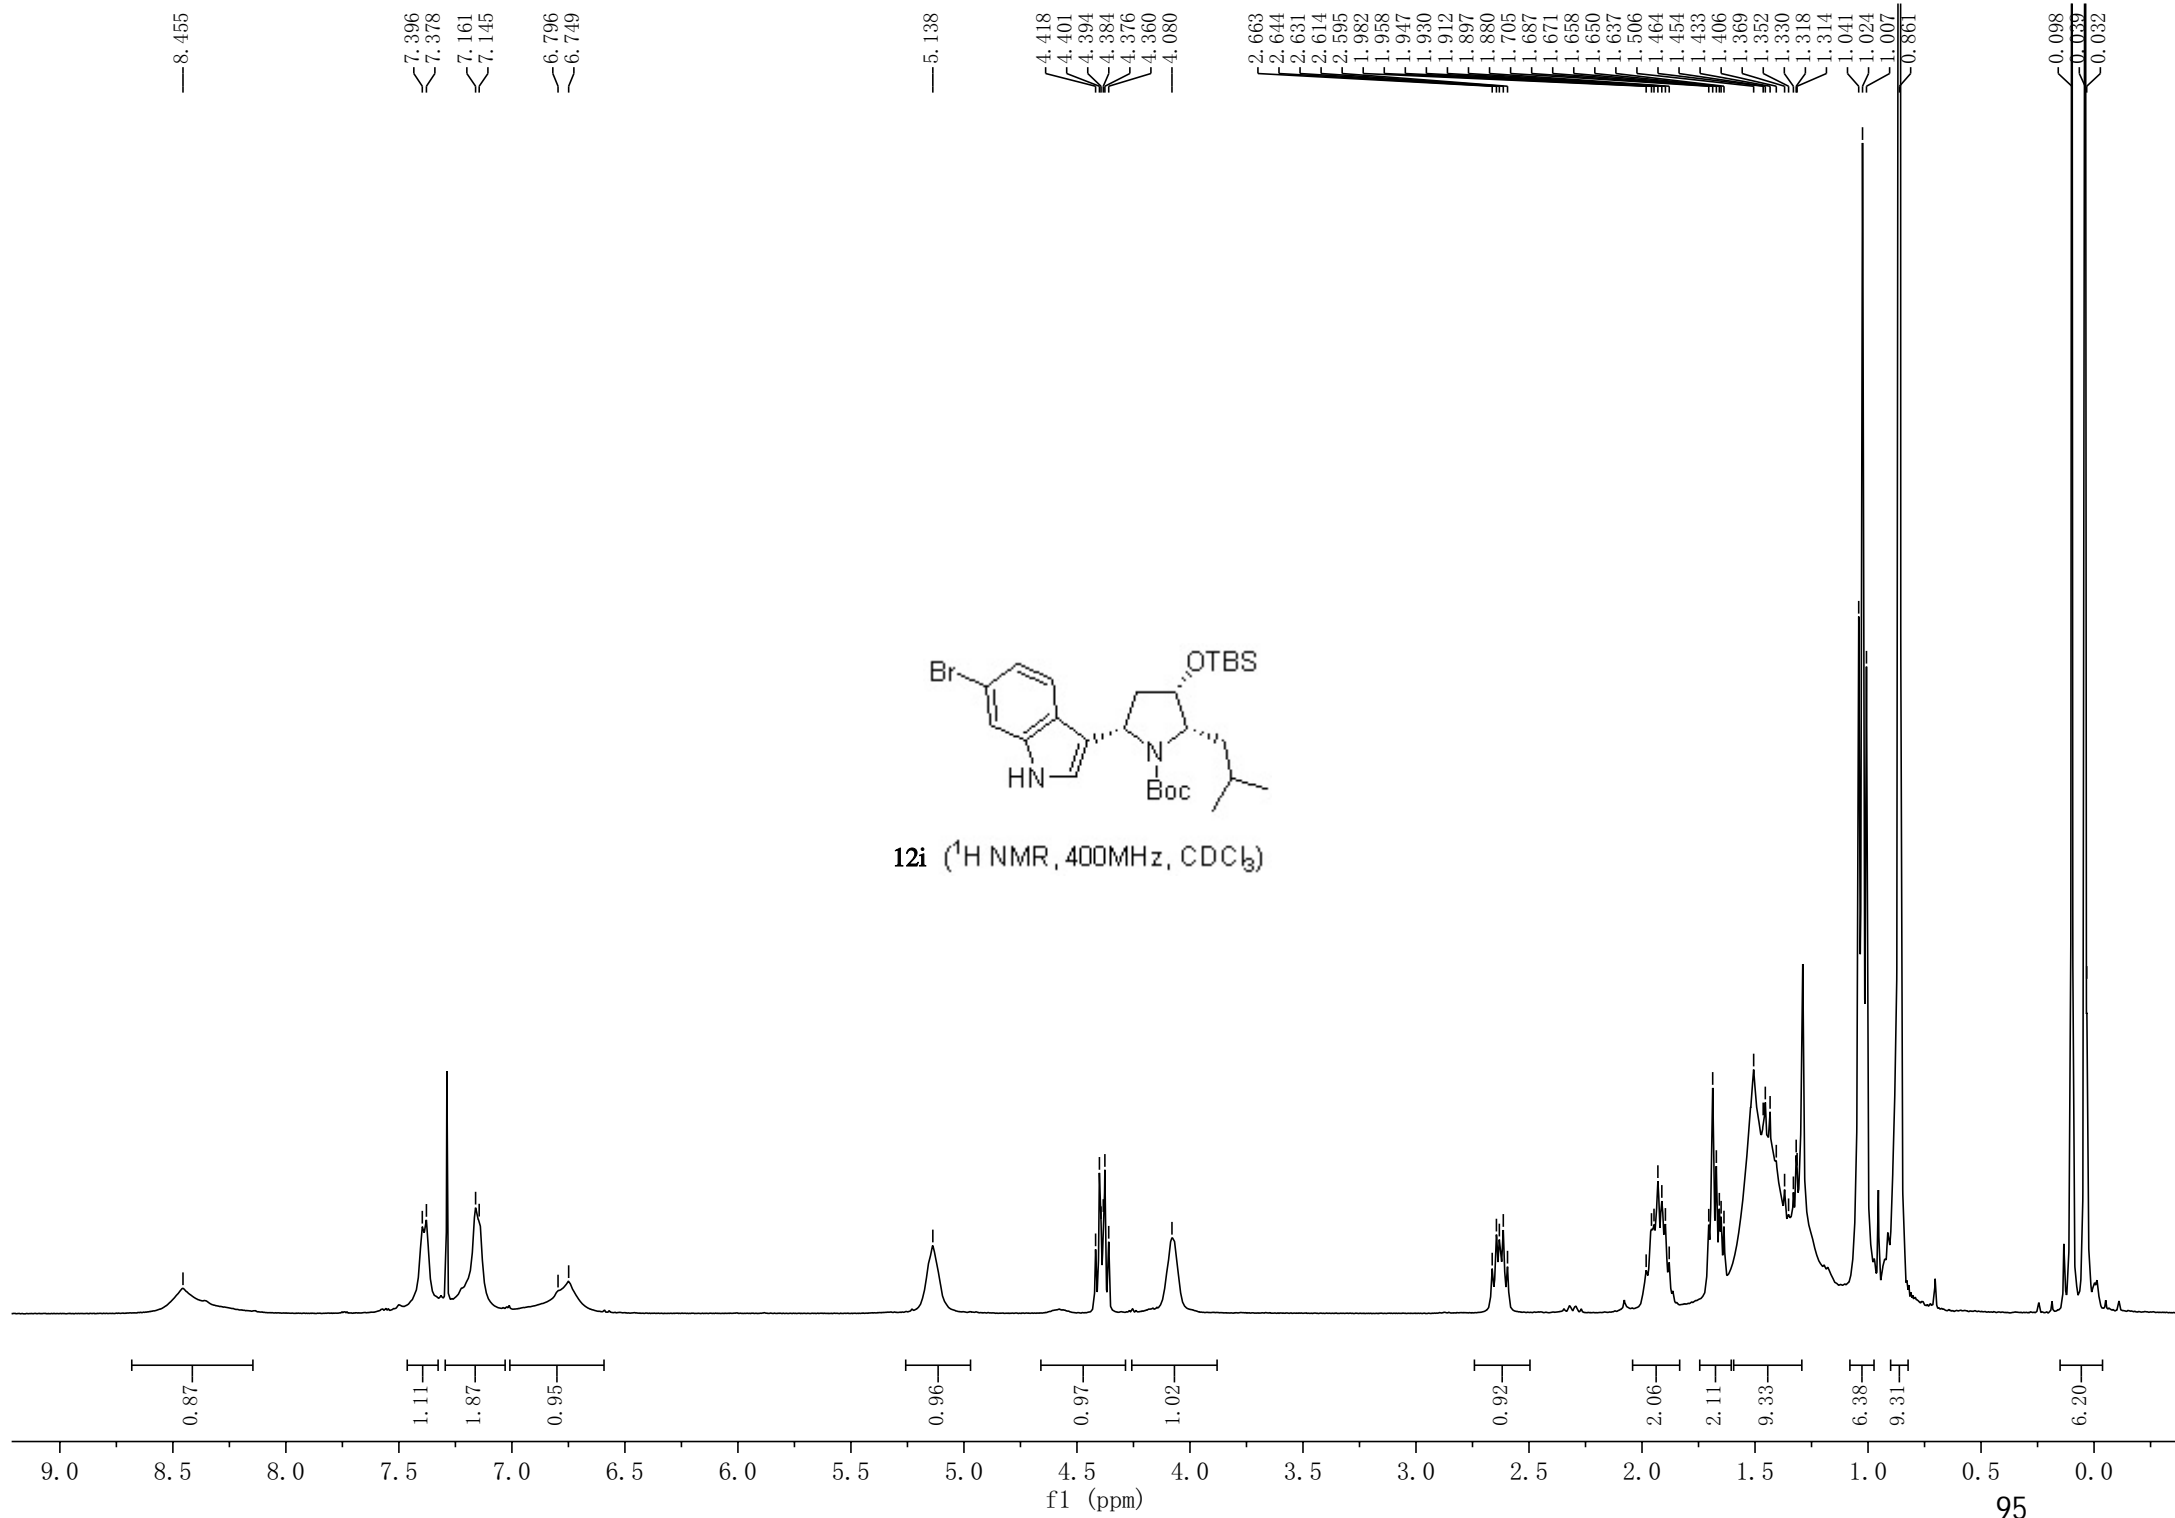

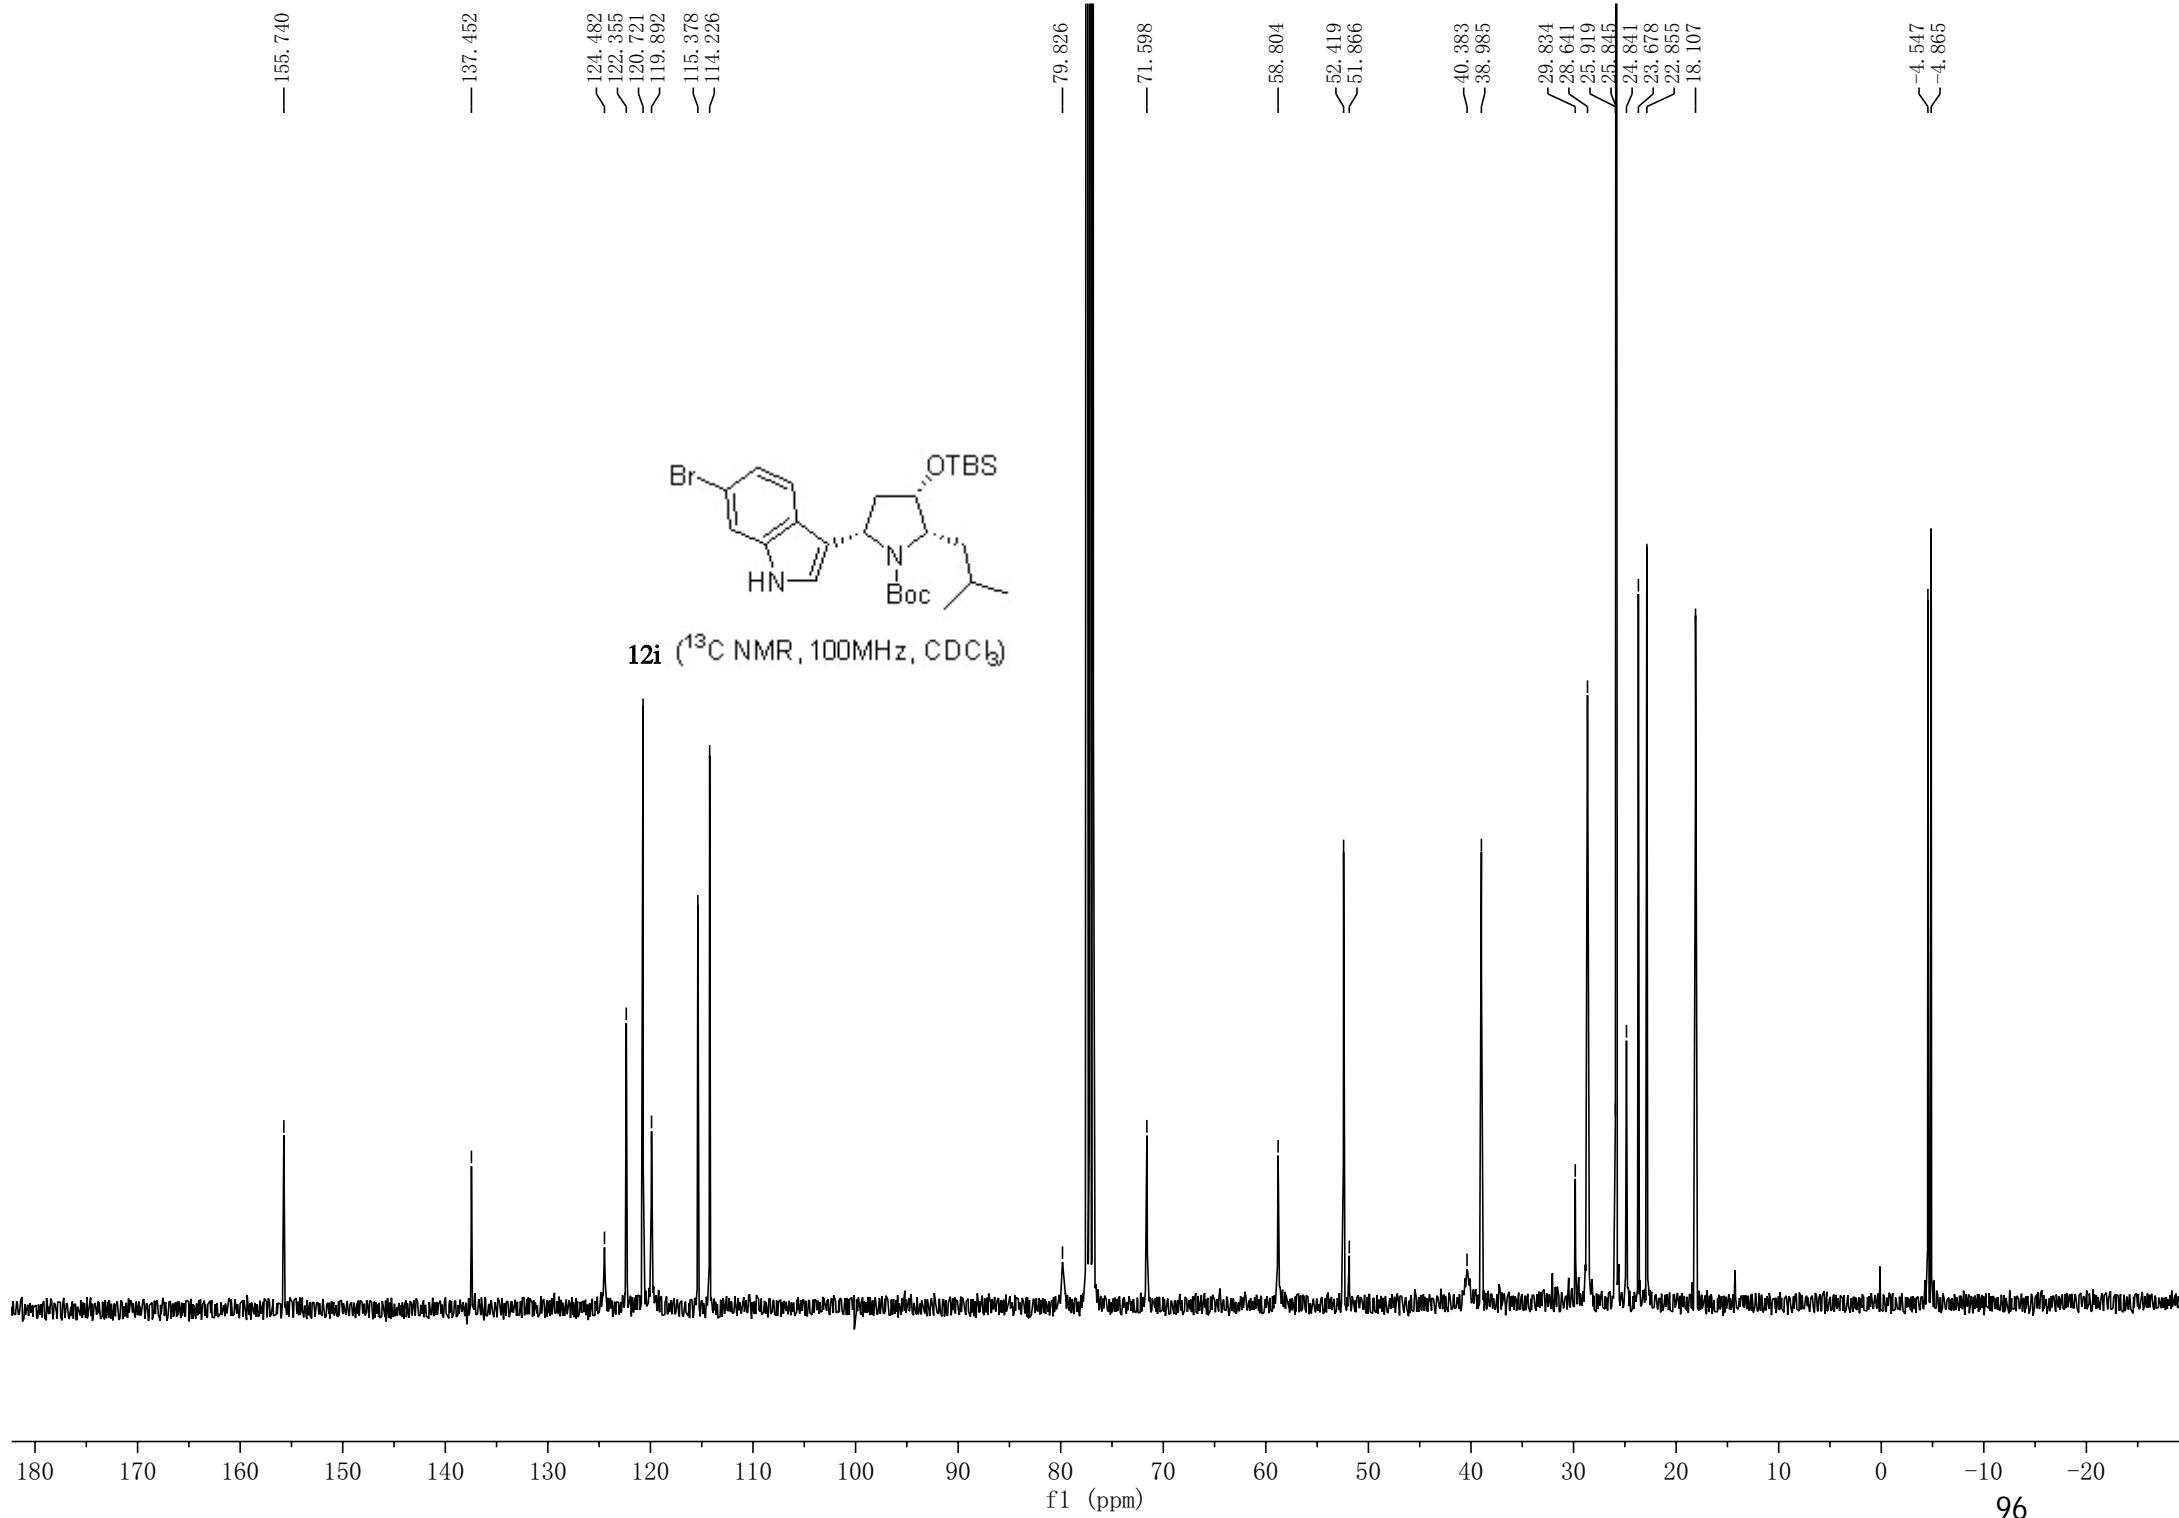



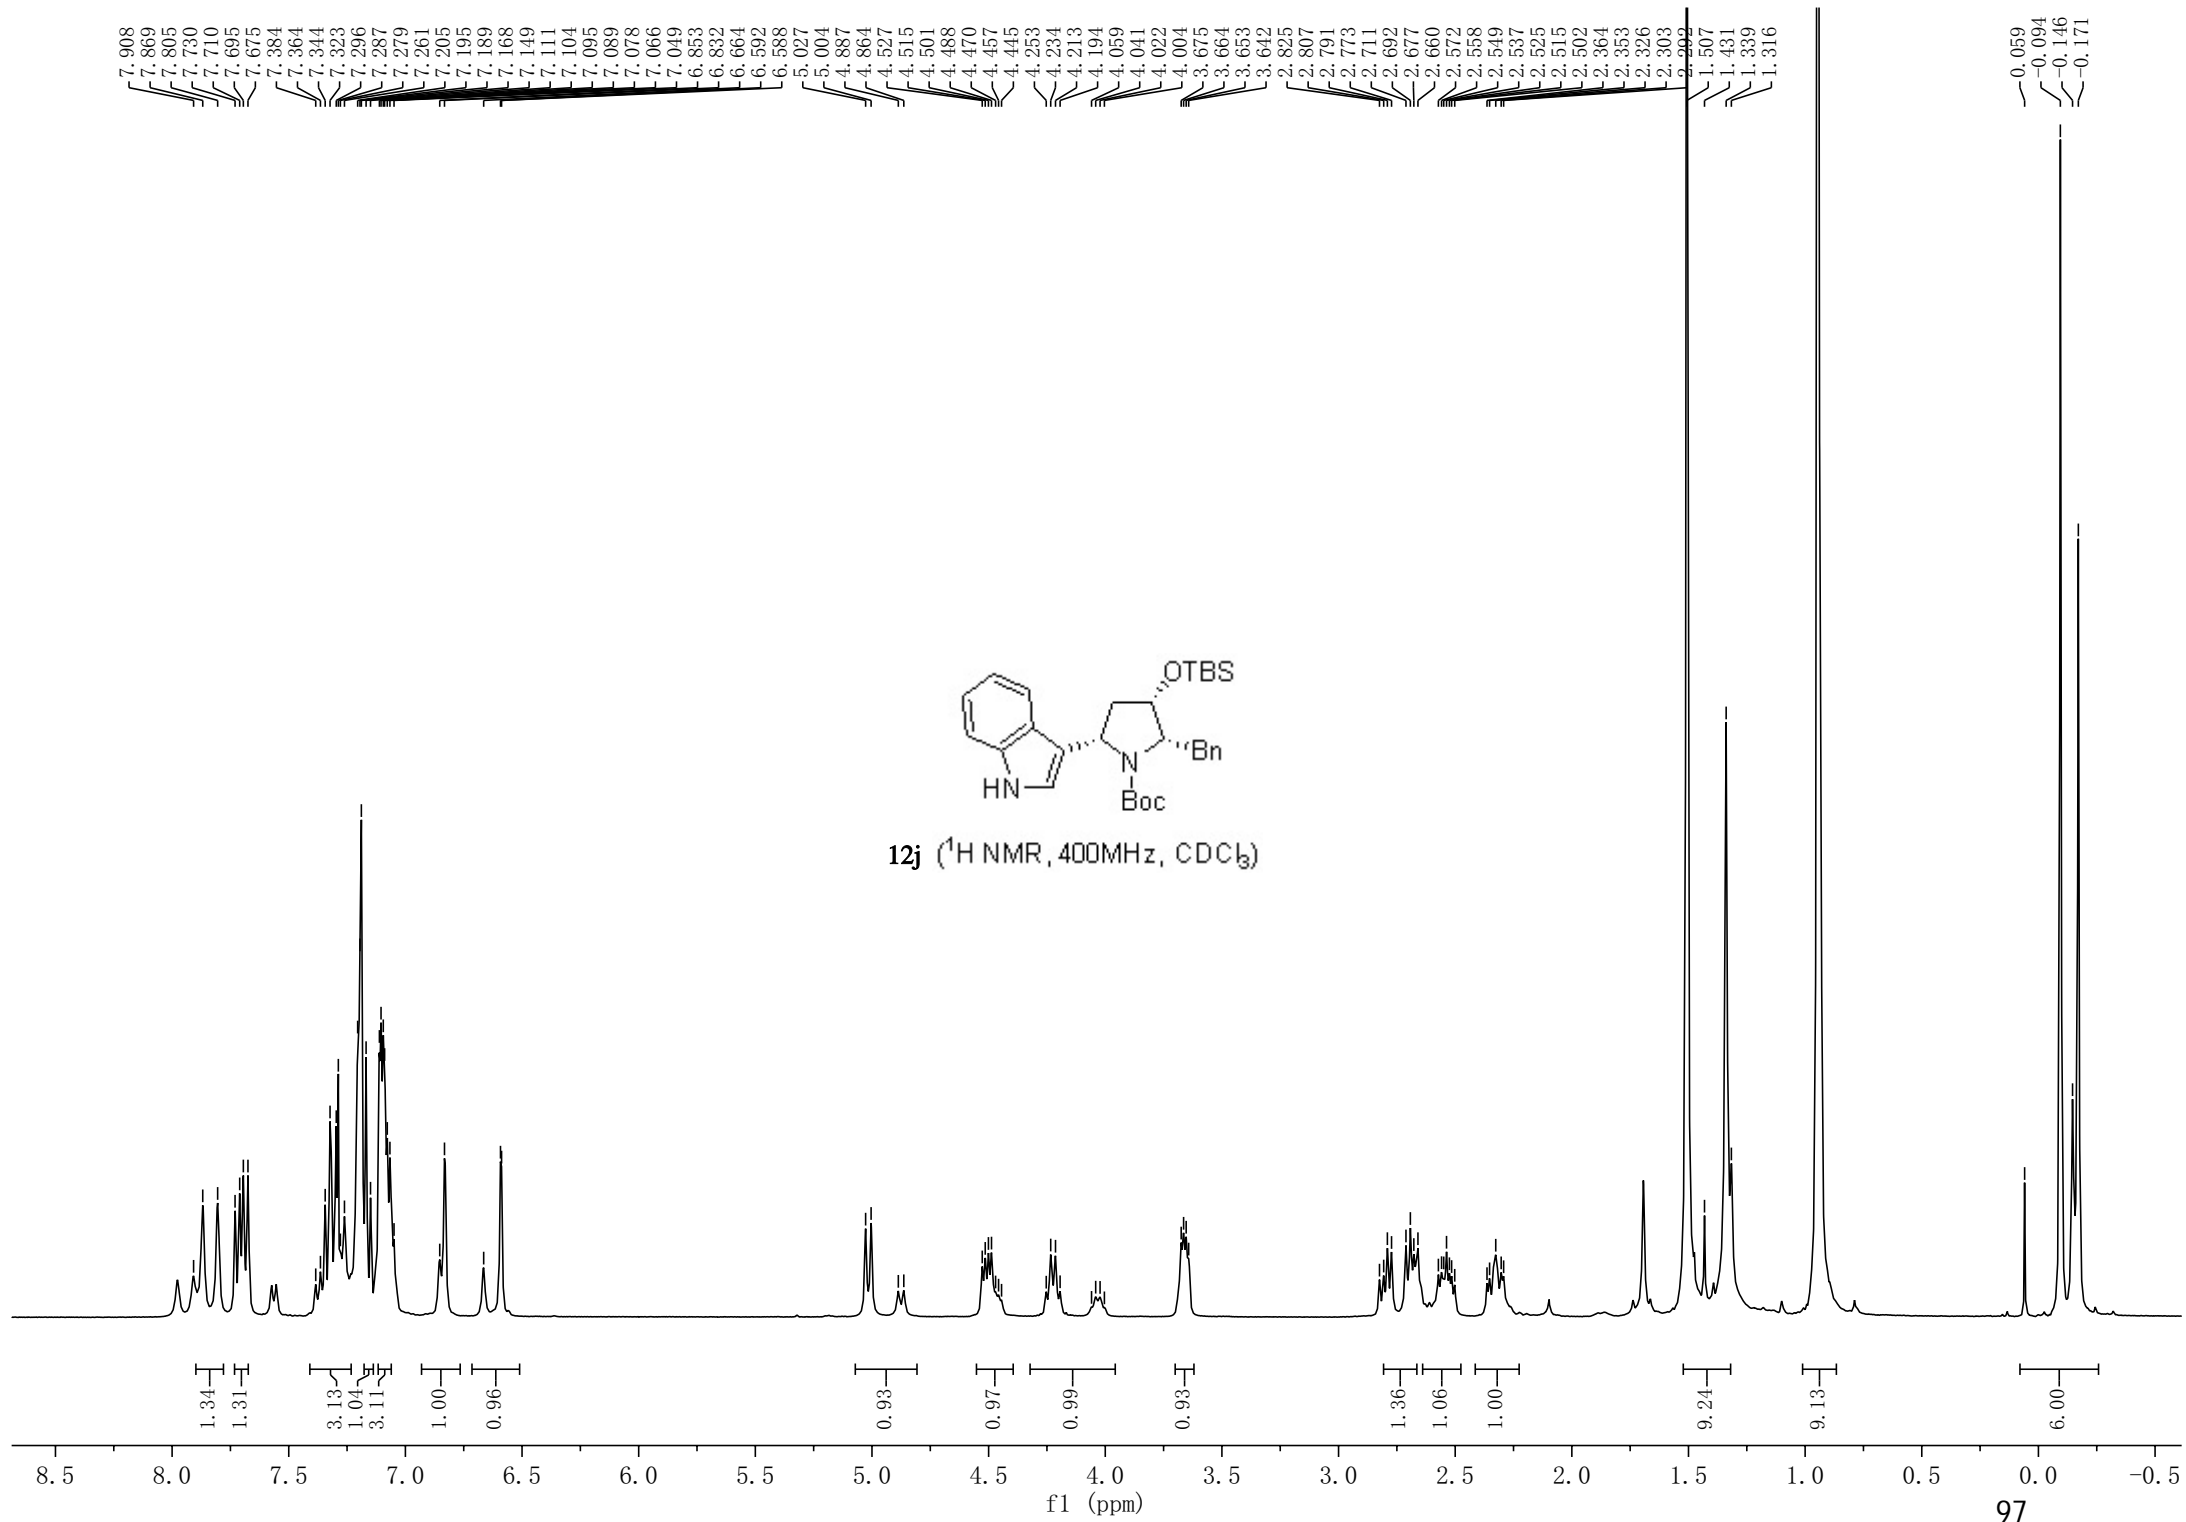

155.951

139.368  
139.003  
136.872  
136.682  
129.423  
128.420  
128.281  
126.959  
126.673  
126.138  
125.986  
122.125  
121.865  
121.674  
121.436  
120.418  
120.099  
119.825  
119.634  
119.248  
119.204  
118.547  
118.097  
111.379  
111.267  
111.078

79.824

79.266

71.802

71.154

55.705

53.960

39.724

39.147

31.049

30.806

28.641

28.319

26.161

26.075

18.247

-3.824

-3.972

-4.769

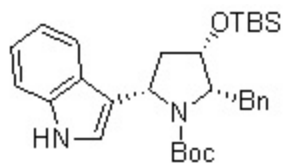

12j (<sup>13</sup>C NMR, 100MHz, CDCl<sub>3</sub>)

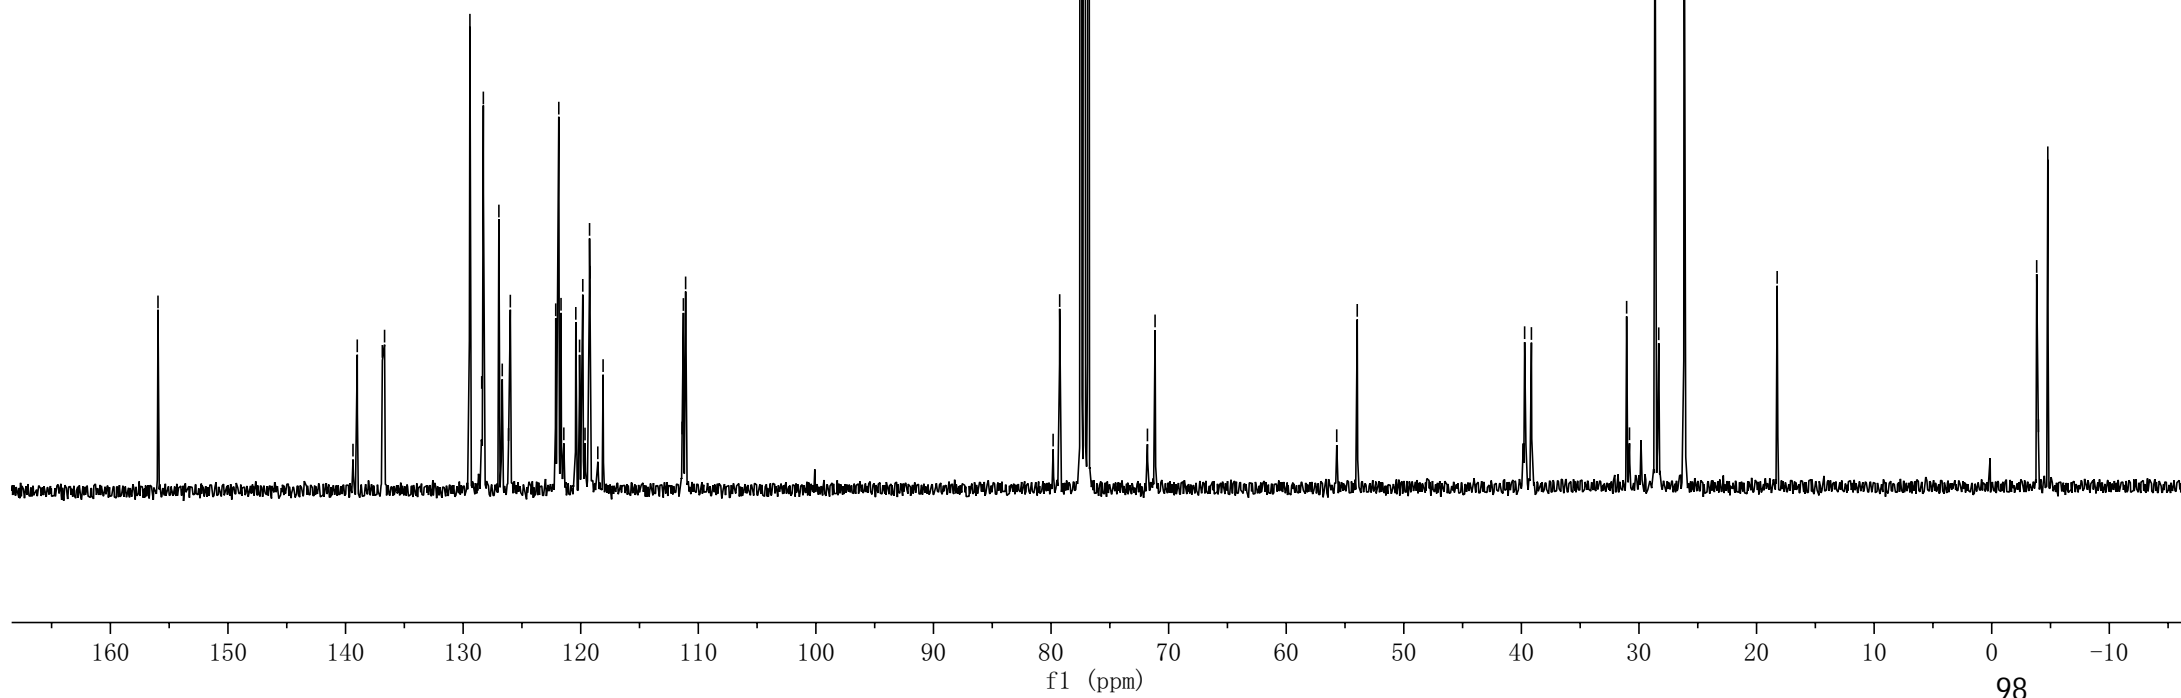

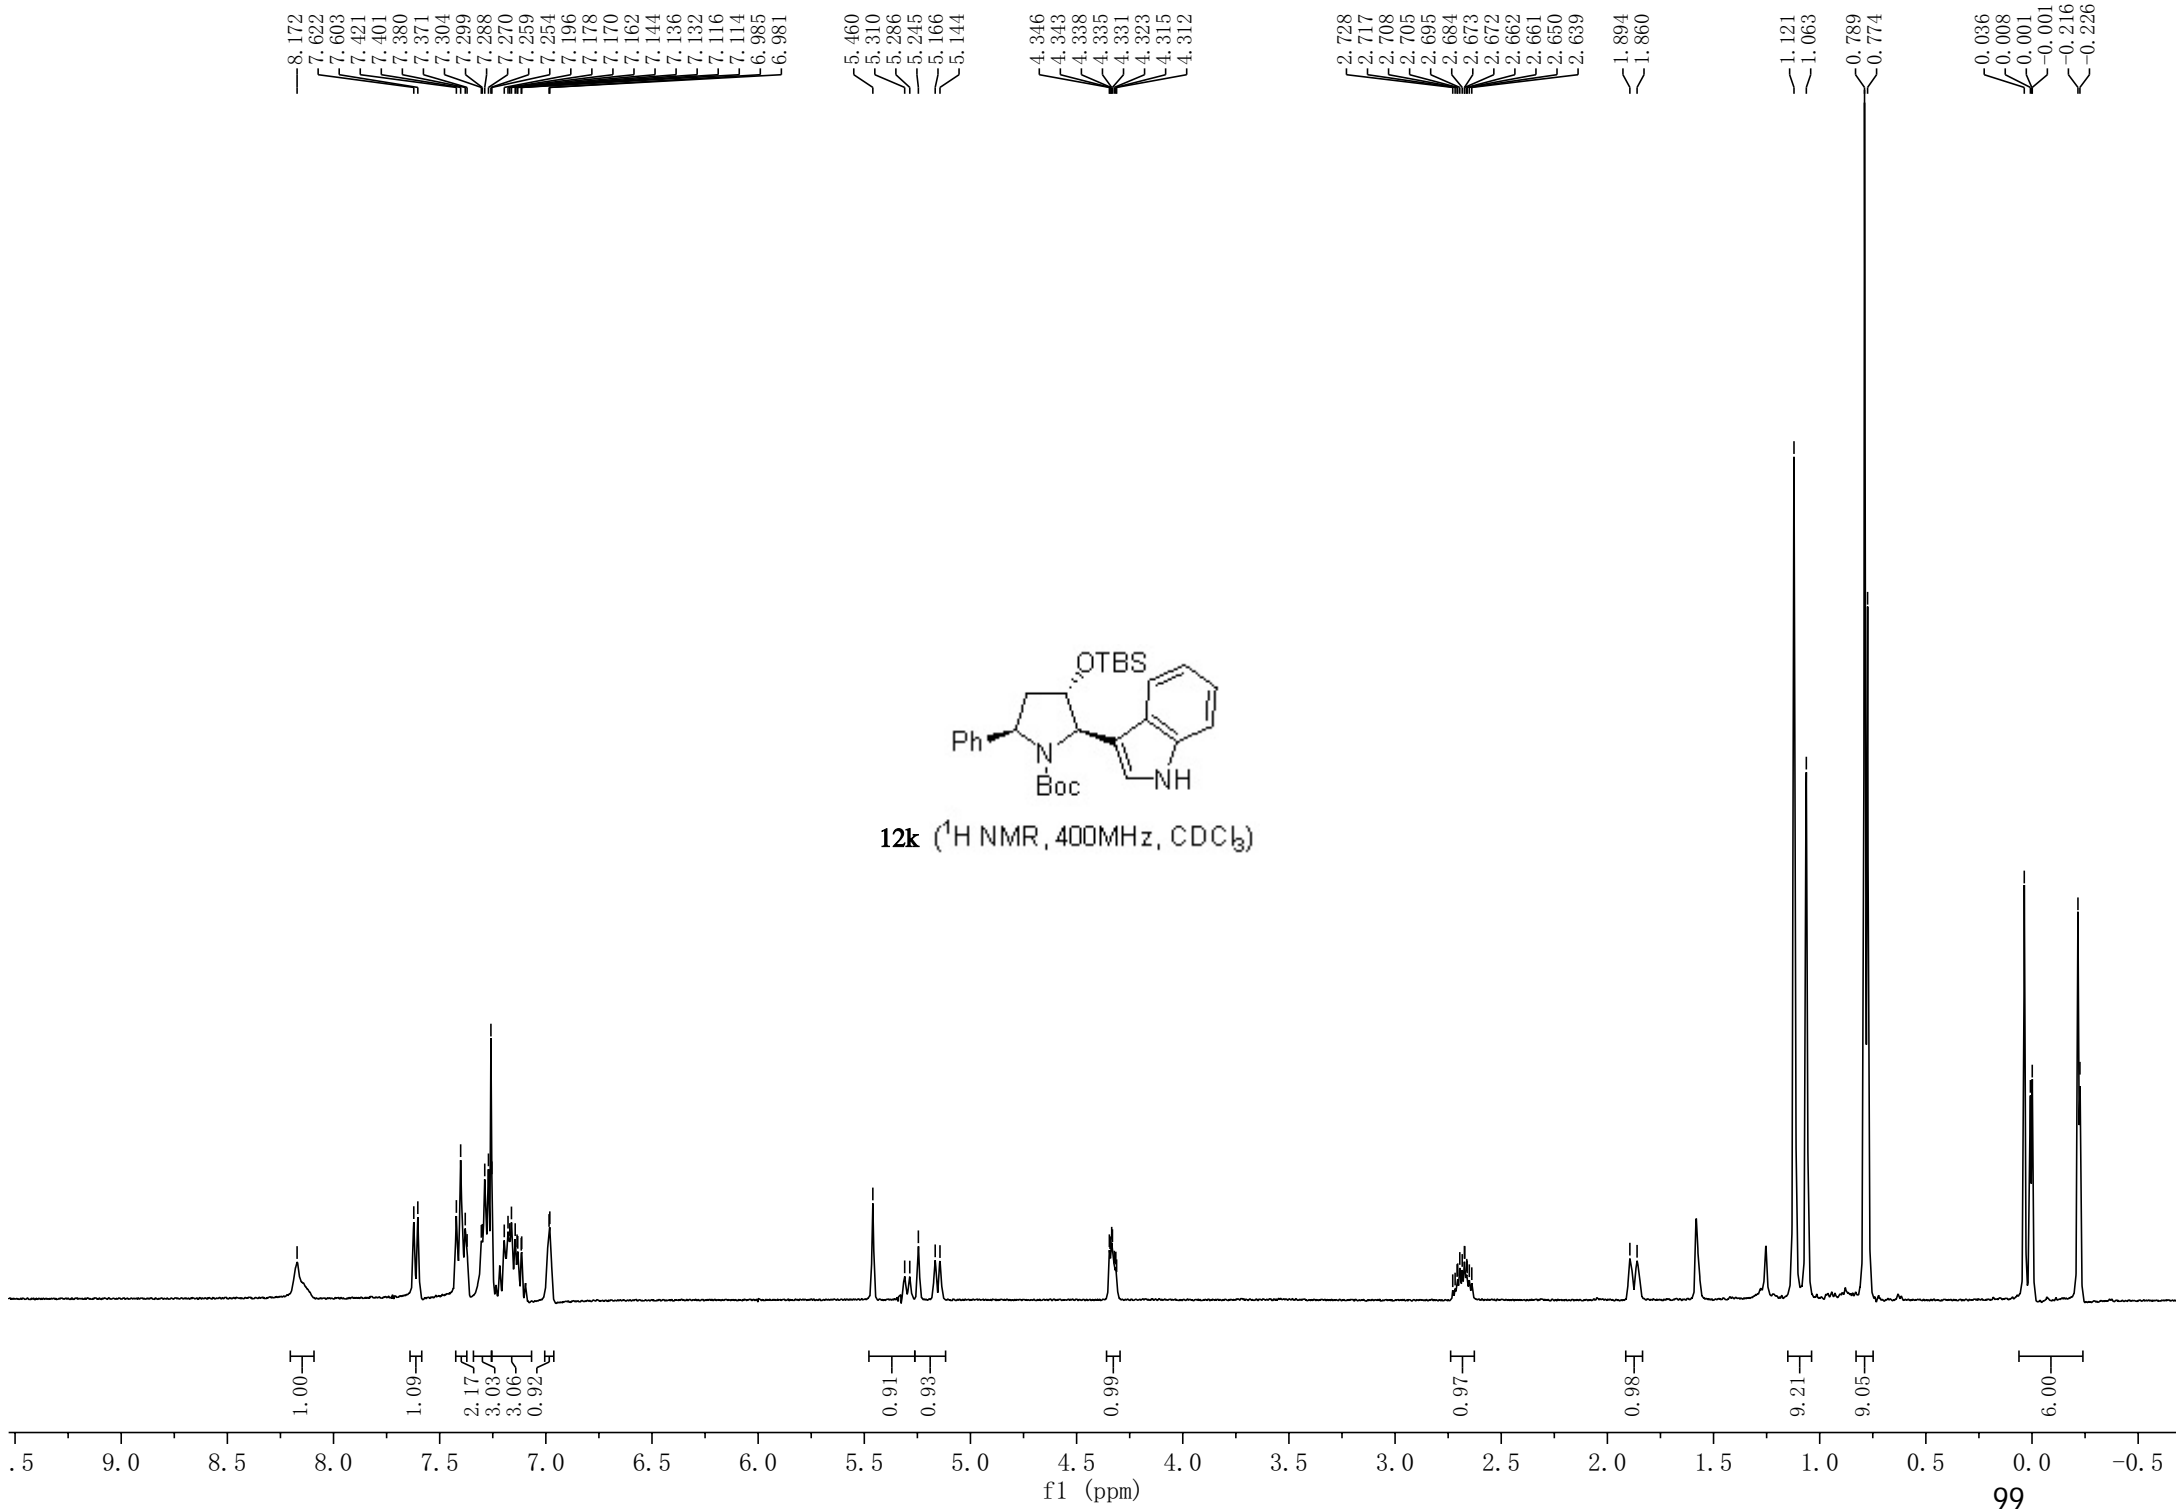

154.815  
154.349  
145.524  
144.372  
137.103  
136.545  
128.133  
127.802  
126.737  
126.326  
126.242  
125.884  
125.640  
122.220  
122.167  
121.112  
120.816  
119.723  
119.630  
118.856  
118.157  
116.505  
111.567  
111.426

79.550  
79.310  
78.554  
77.944

65.959  
65.919  
62.045  
61.158

41.761  
41.293

28.229  
25.799

18.026

-4.703  
-4.936

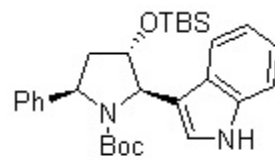

12k (<sup>13</sup>C NMR, 100MHz, CDCl<sub>3</sub>)

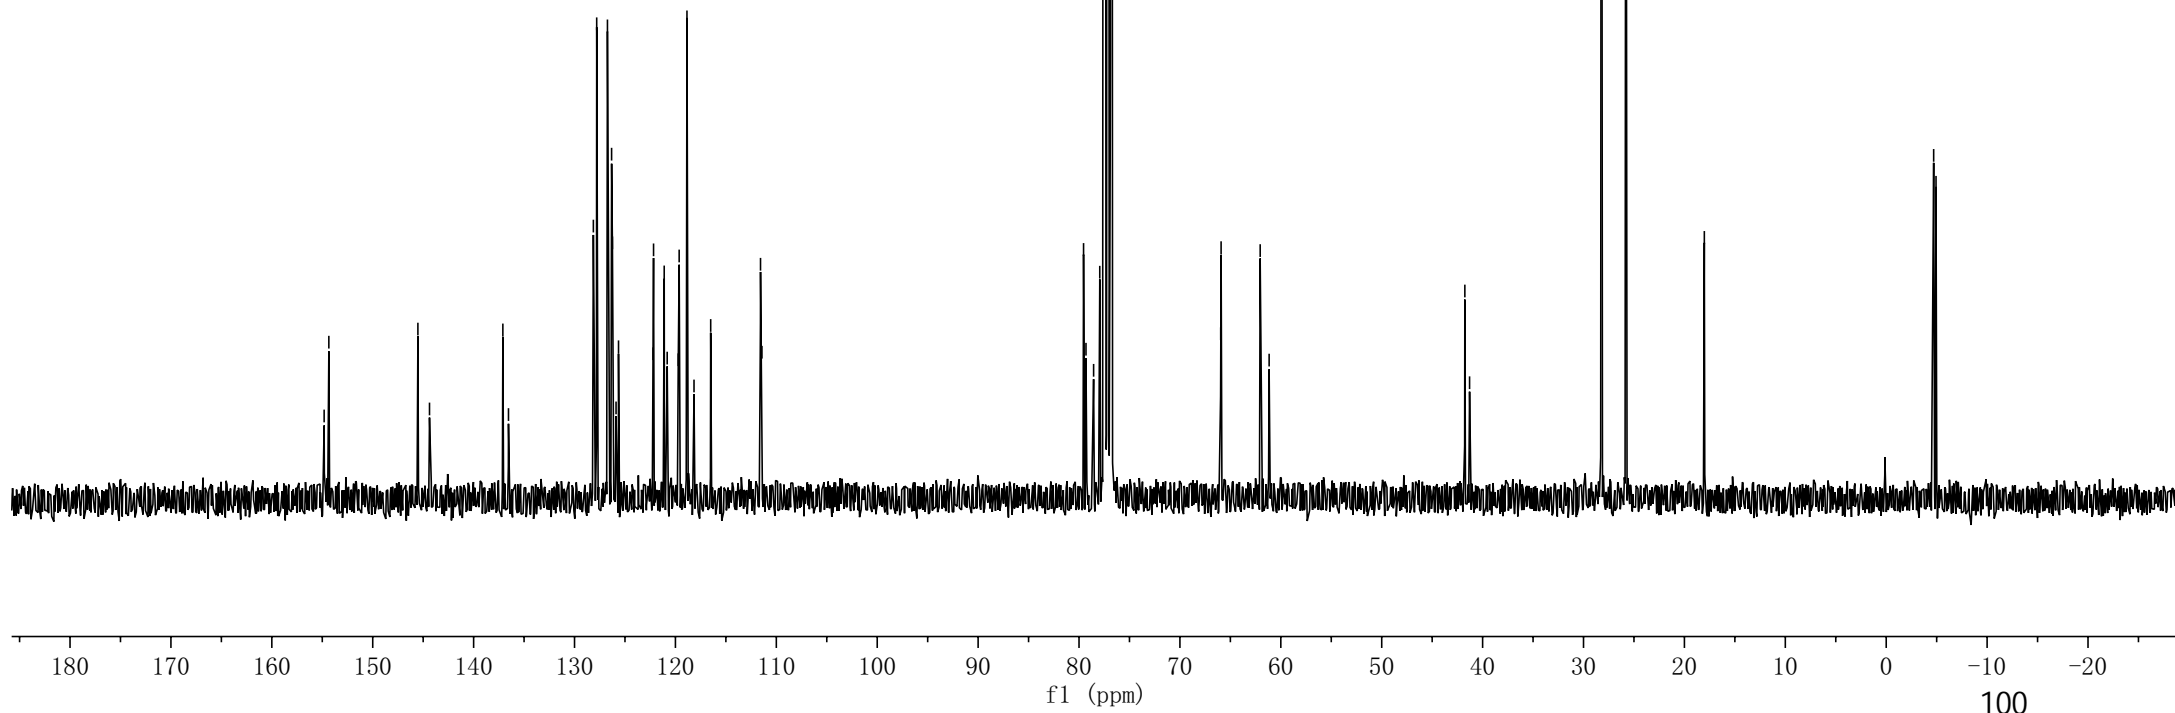

HPLC data of **8b**

### <Chromatogram>

mAU

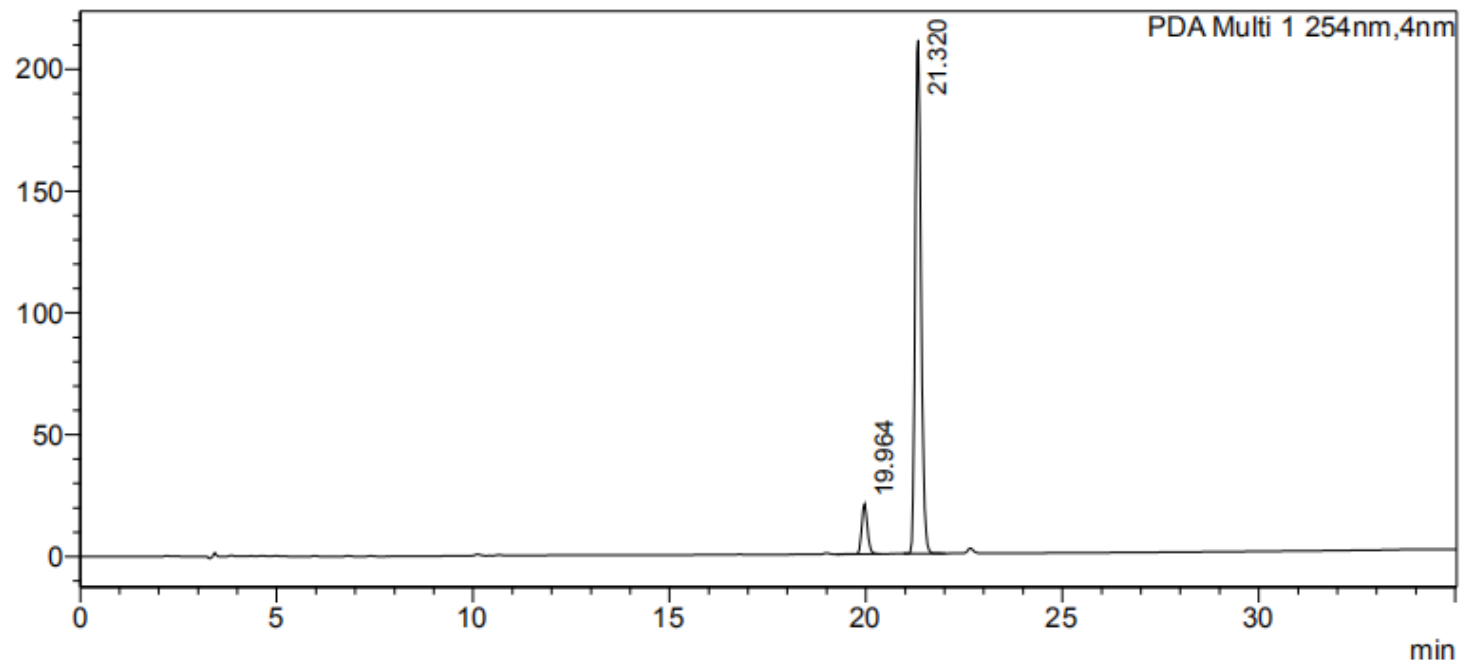

### <Peak Table>

PDA Ch1 254nm

| Peak# | Ret. Time | Area    | Height | Conc.  |
|-------|-----------|---------|--------|--------|
| 1     | 19.964    | 202607  | 20504  | 8.474  |
| 2     | 21.320    | 2188340 | 210798 | 91.526 |
| Total |           | 2390947 | 231302 |        |

HPLC data of 8c

### <Chromatogram>

mAU

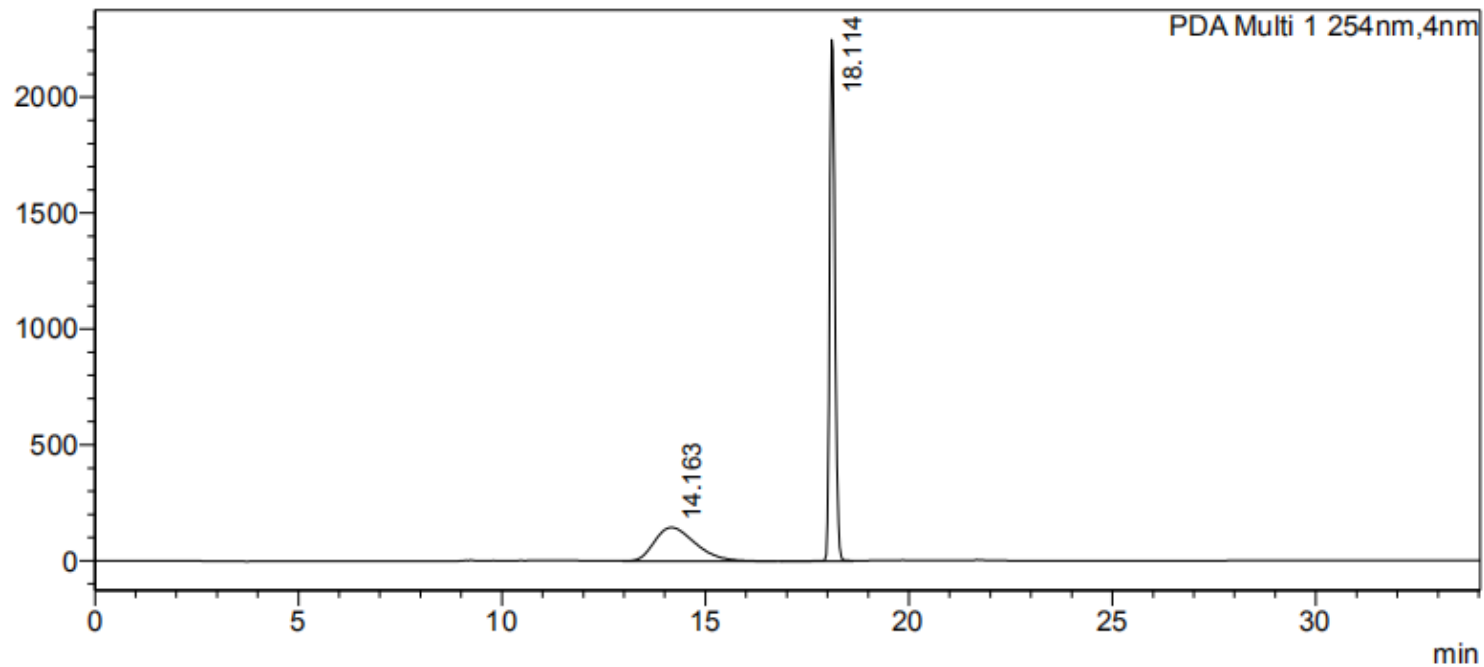

### <Peak Table>

PDA Ch1 254nm

| Peak# | Ret. Time | Area     | Height  | Conc.  |
|-------|-----------|----------|---------|--------|
| 1     | 14.163    | 10186719 | 145836  | 33.222 |
| 2     | 18.114    | 20475690 | 2251122 | 66.778 |
| Total |           | 30662409 | 2396958 |        |

HPLC data of 8d

### <Chromatogram>

mAU

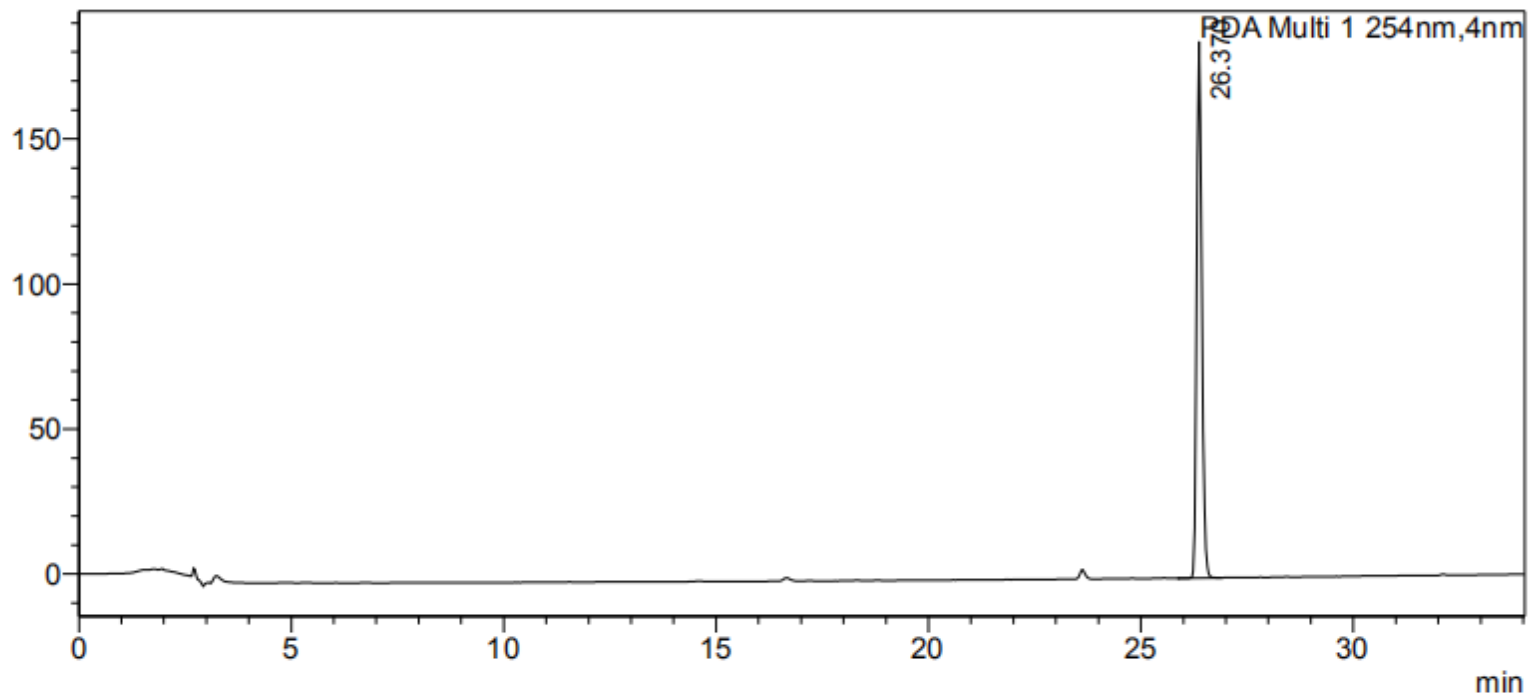

### <Peak Table>

PDA Ch1 254nm

| Peak# | Ret. Time | Area    | Height | Conc.   |
|-------|-----------|---------|--------|---------|
| 1     | 26.370    | 1527804 | 184947 | 100.000 |
| Total |           | 1527804 | 184947 |         |

HPLC data of 8e

### <Chromatogram>

mAU

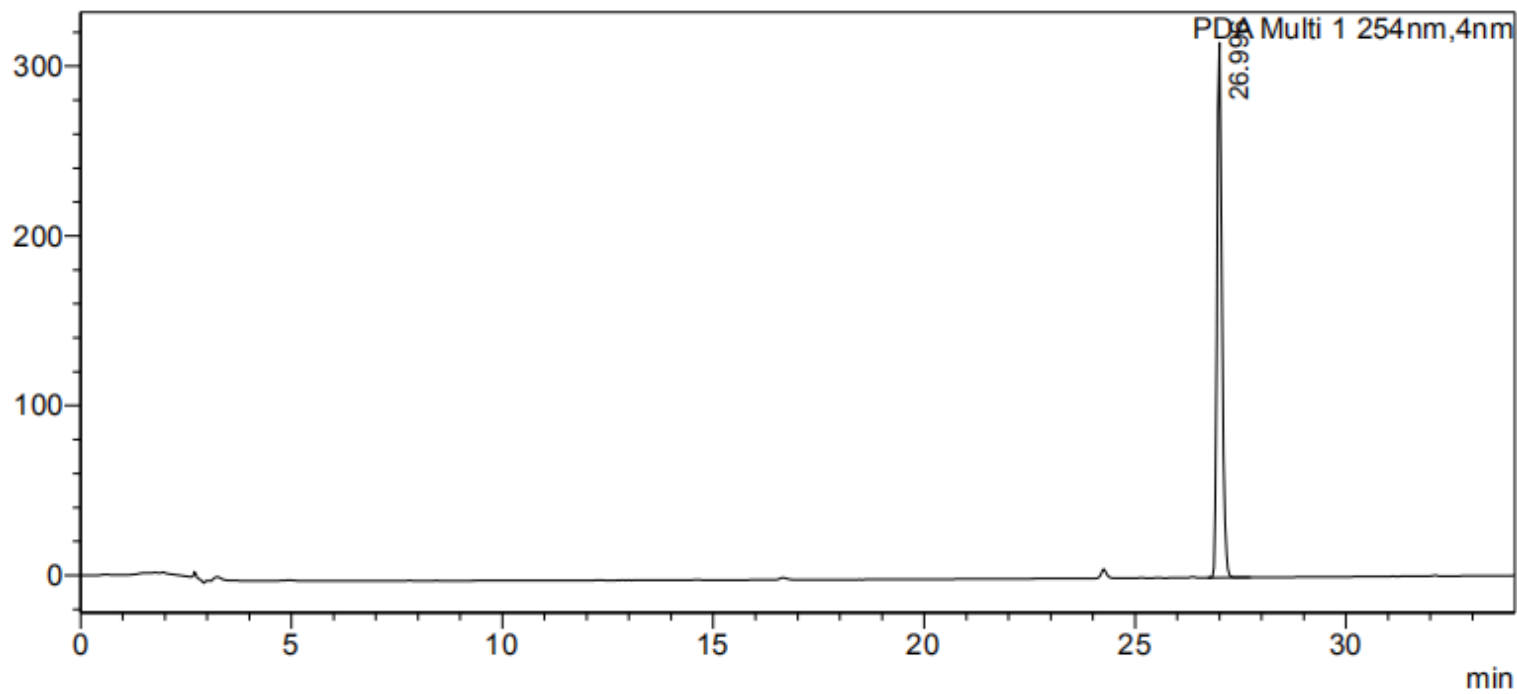

### <Peak Table>

PDA Ch1 254nm

| Peak# | Ret. Time | Area    | Height | Conc.   |
|-------|-----------|---------|--------|---------|
| 1     | 26.996    | 2599864 | 315364 | 100.000 |
| Total |           | 2599864 | 315364 |         |



HPLC data of 8f

### <Chromatogram>

mAU

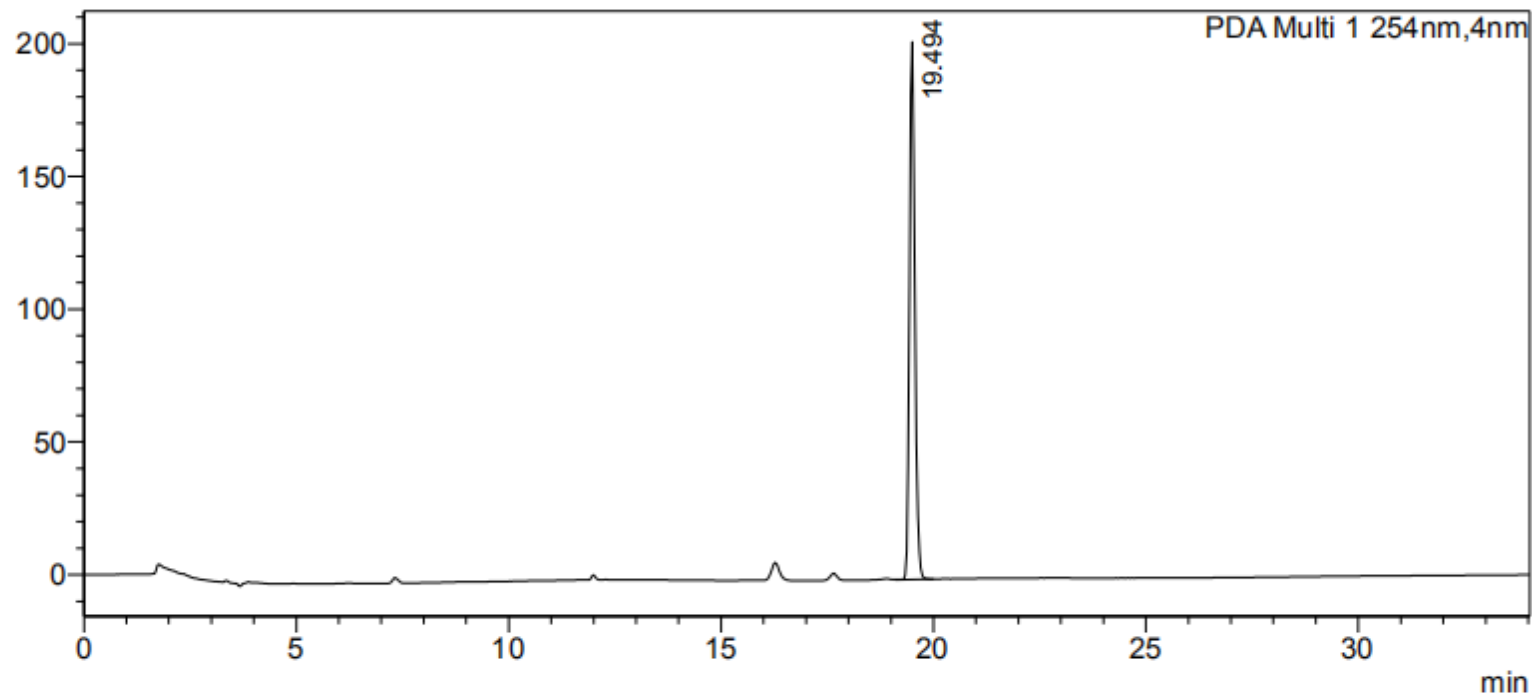

### <Peak Table>

PDA Ch1 254nm

| Peak# | Ret. Time | Area    | Height | Conc.   |
|-------|-----------|---------|--------|---------|
| 1     | 19.494    | 1812528 | 202585 | 100.000 |
| Total |           | 1812528 | 202585 |         |

HPLC data of 8g

### <Chromatogram>

mAU

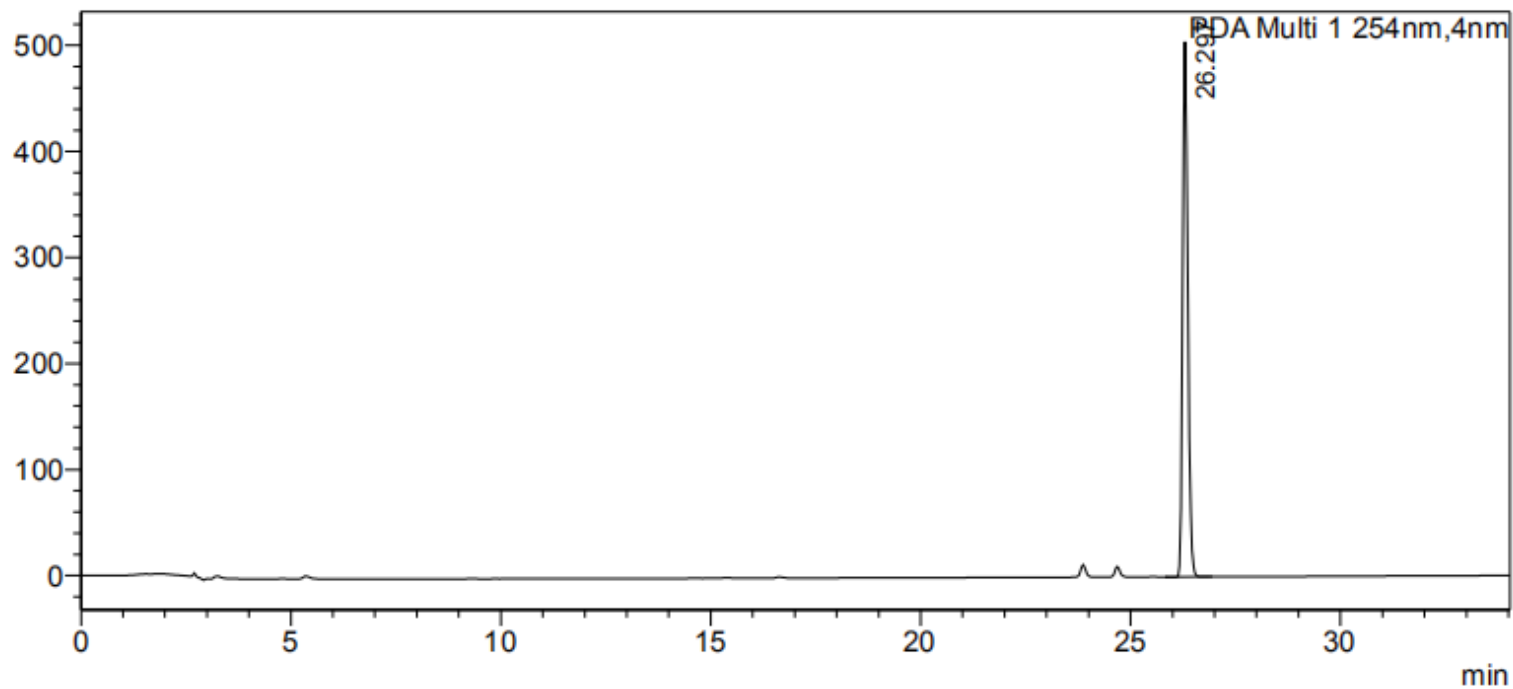

### <Peak Table>

PDA Ch1 254nm

| Peak# | Ret. Time | Area    | Height | Conc.   |
|-------|-----------|---------|--------|---------|
| 1     | 26.297    | 4265935 | 504599 | 100.000 |
| Total |           | 4265935 | 504599 |         |

HPLC data of 8h

### <Chromatogram>

mAU

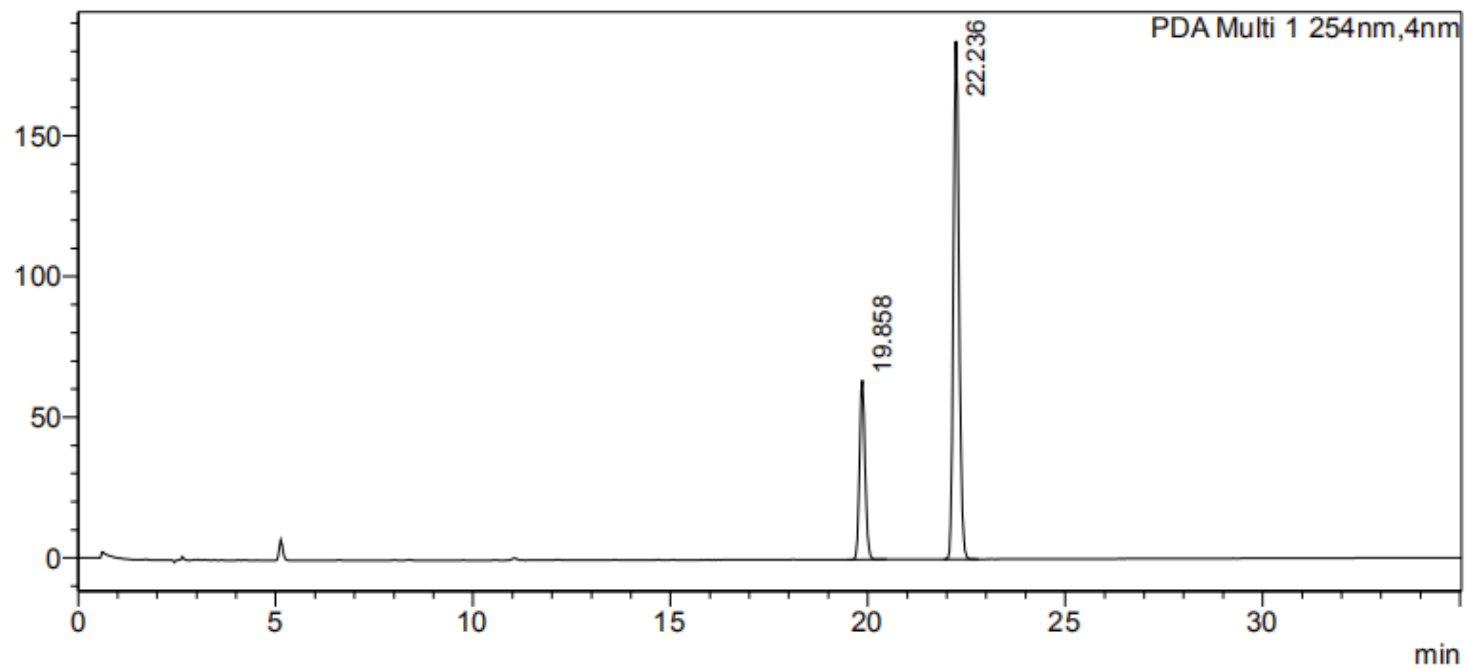

### <Peak Table>

PDA Ch1 254nm

| Peak# | Ret. Time | Area    | Height | Conc.  |
|-------|-----------|---------|--------|--------|
| 1     | 19.858    | 626505  | 63755  | 25.512 |
| 2     | 22.236    | 1829255 | 184118 | 74.488 |
| Total |           | 2455760 | 247873 |        |

HPLC data of 8i

### <Chromatogram>

mAU

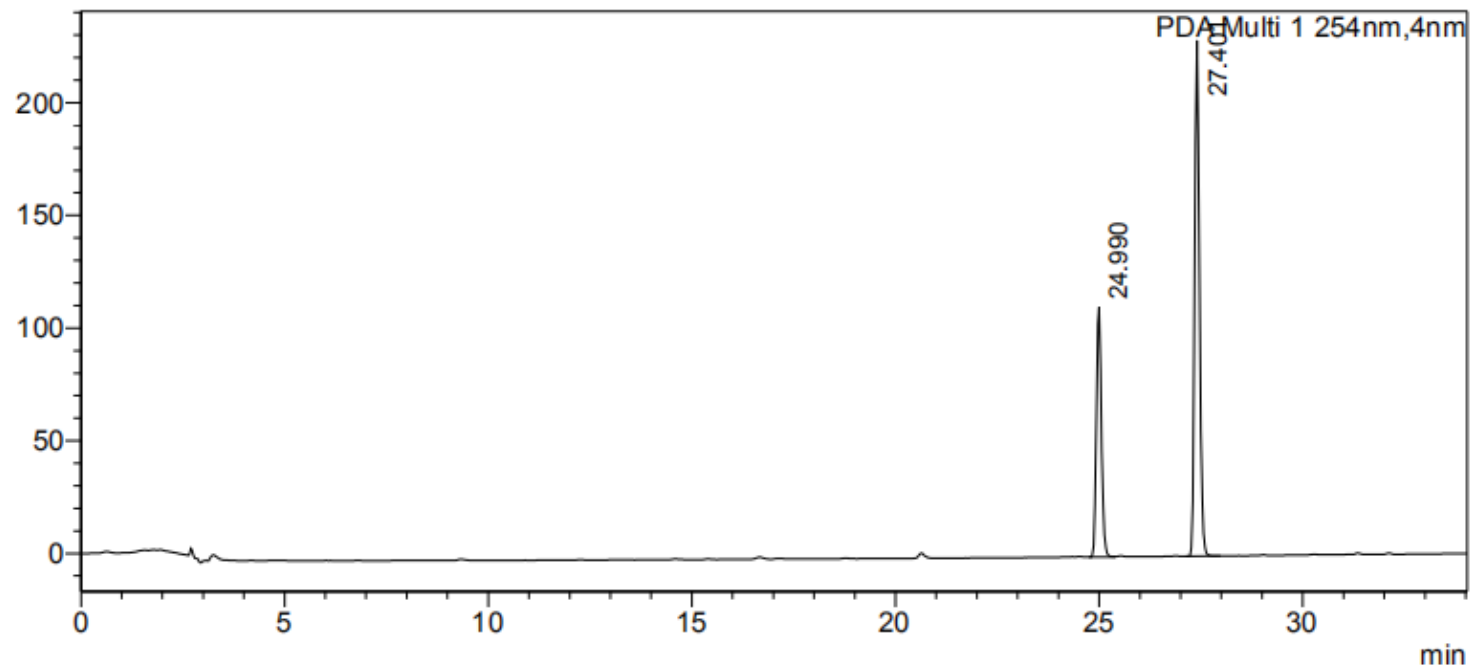

### <Peak Table>

PDA Ch1 254nm

| Peak# | Ret. Time | Area    | Height | Conc.  |
|-------|-----------|---------|--------|--------|
| 1     | 24.990    | 948305  | 110861 | 33.782 |
| 2     | 27.401    | 1858819 | 228861 | 66.218 |
| Total |           | 2807125 | 339721 |        |

HPLC data of 8j

### <Chromatogram>

mAU

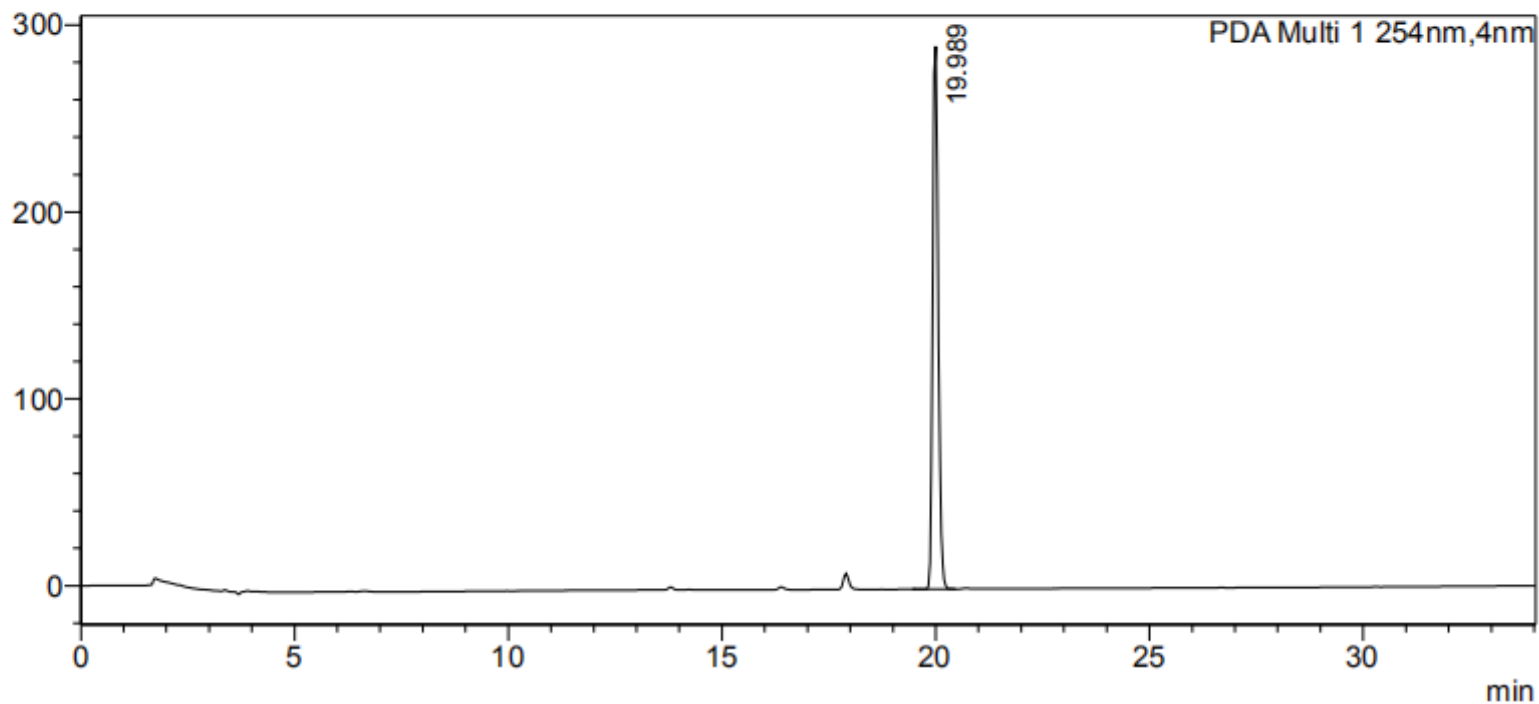

### <Peak Table>

PDA Ch1 254nm

| Peak# | Ret. Time | Area    | Height | Conc.   |
|-------|-----------|---------|--------|---------|
| 1     | 19.989    | 2580039 | 290415 | 100.000 |
| Total |           | 2580039 | 290415 |         |

HPLC data of 8o

### <Chromatogram>

mAU

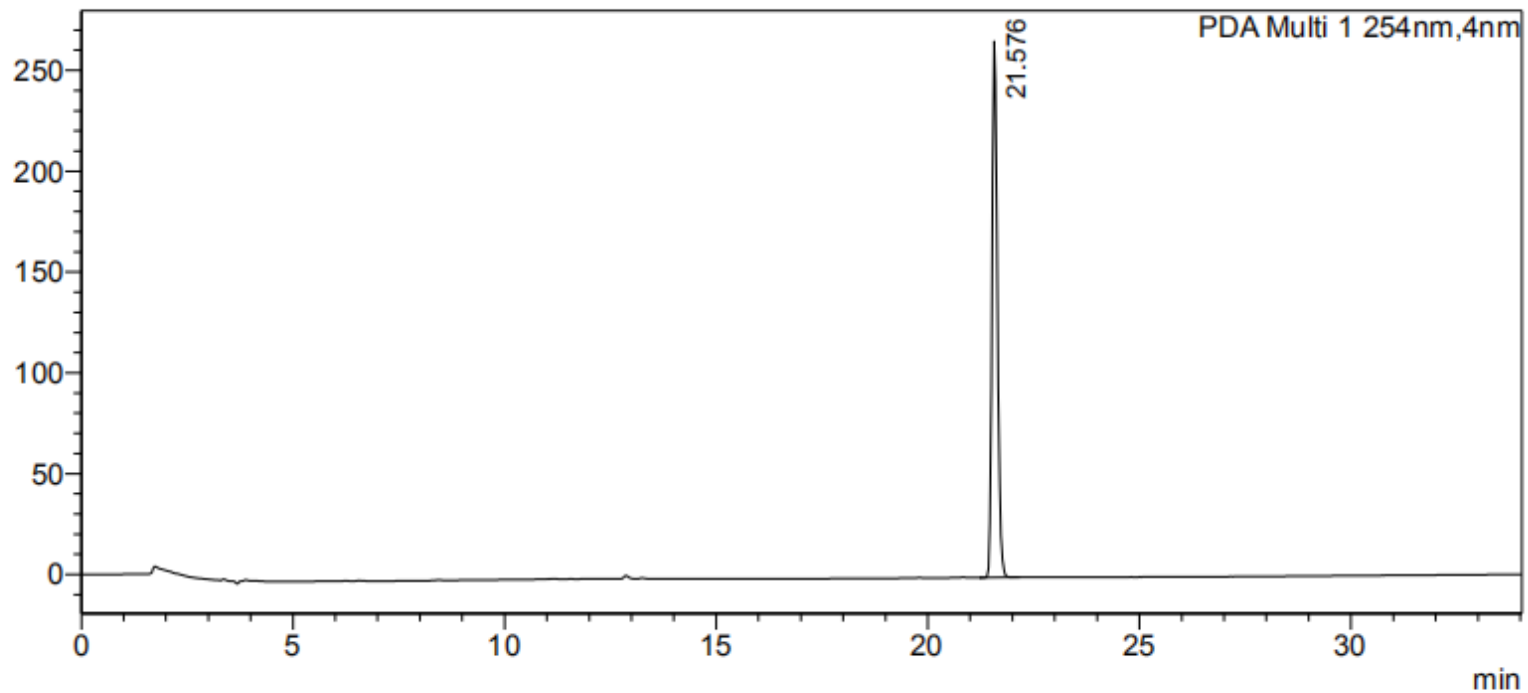

### <Peak Table>

PDA Ch1 254nm

| Peak# | Ret. Time | Area    | Height | Conc.   |
|-------|-----------|---------|--------|---------|
| 1     | 21.576    | 2366172 | 266067 | 100.000 |
| Total |           | 2366172 | 266067 |         |

HPLC data of 8q

### <Chromatogram>

mAU

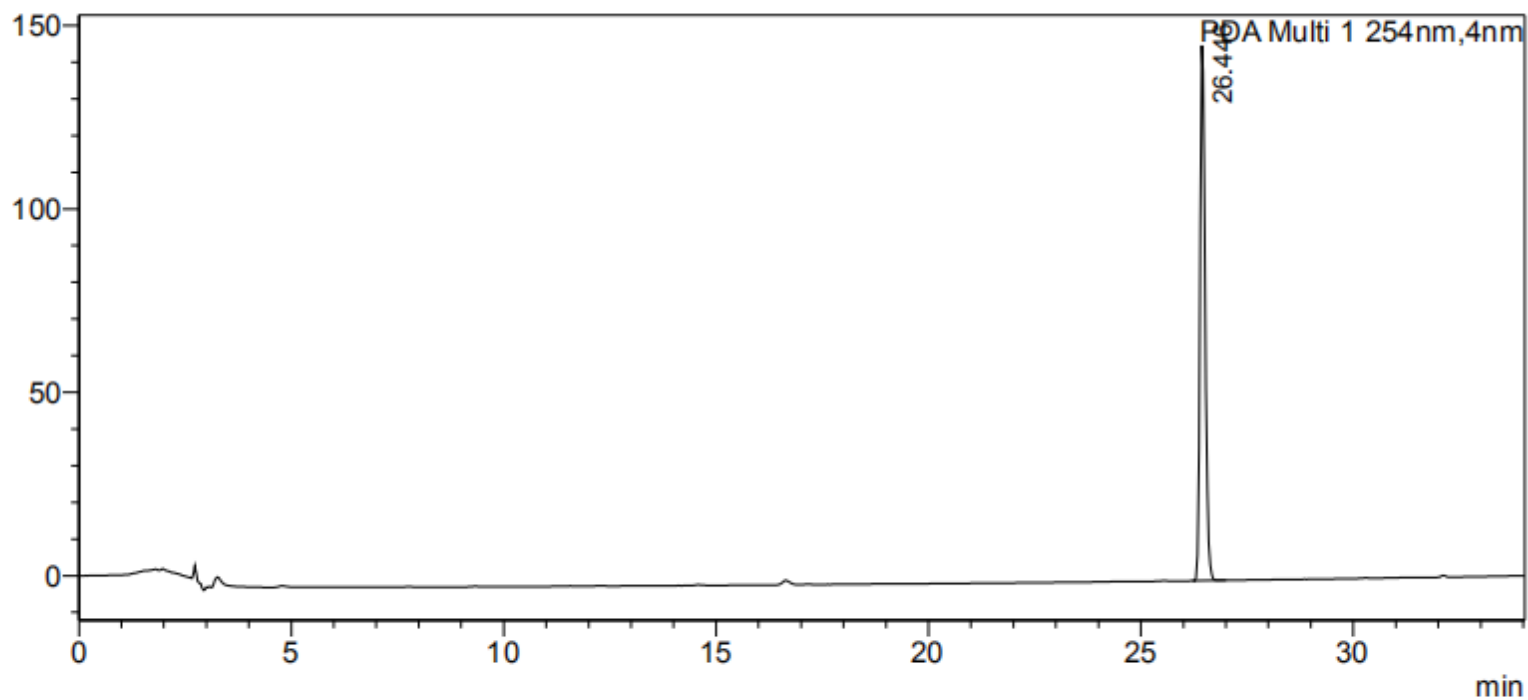

### <Peak Table>

PDA Ch1 254nm

| Peak# | Ret. Time | Area    | Height | Conc.   |
|-------|-----------|---------|--------|---------|
| 1     | 26.446    | 1230264 | 145890 | 100.000 |
| Total |           | 1230264 | 145890 |         |

HPLC data of 8r

### <Chromatogram>

mAU

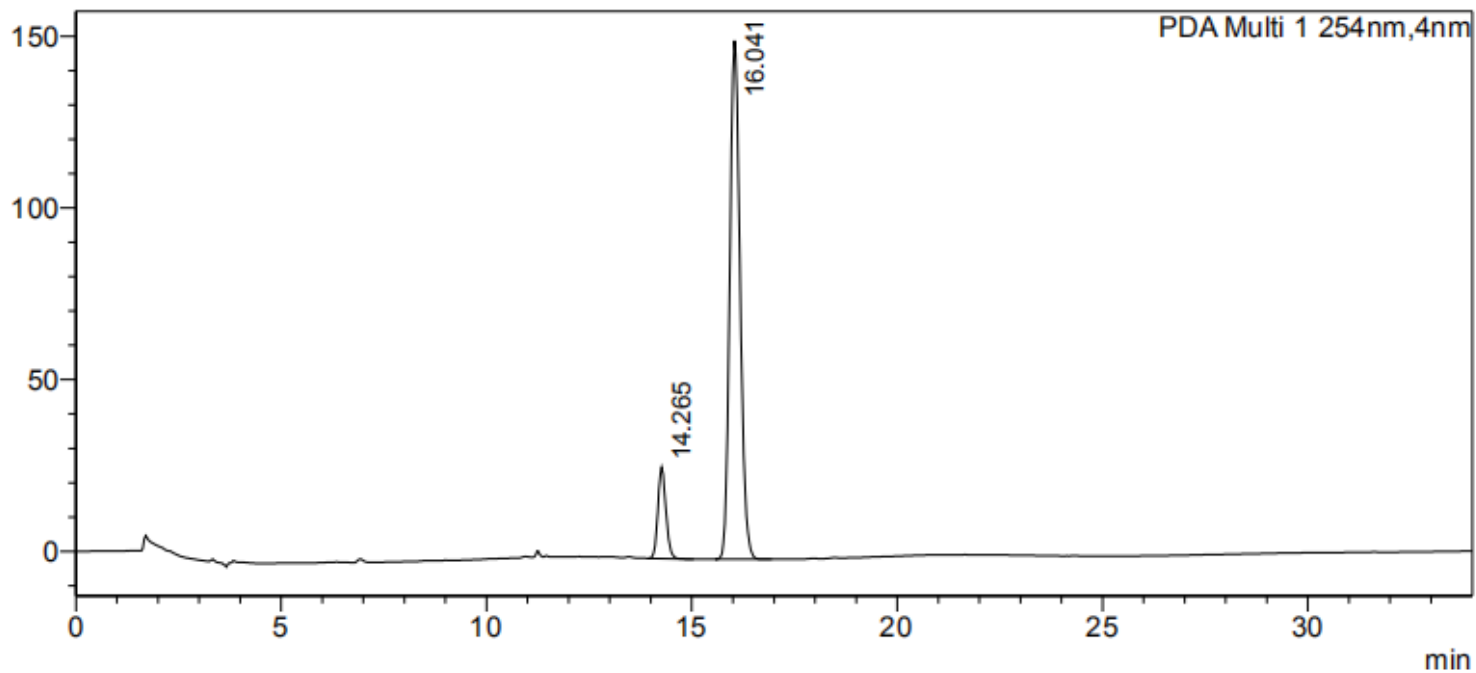

### <Peak Table>

PDA Ch1 254nm

| Peak# | Ret. Time | Area    | Height | Conc.  |
|-------|-----------|---------|--------|--------|
| 1     | 14.265    | 361193  | 26587  | 12.082 |
| 2     | 16.041    | 2628437 | 151014 | 87.918 |
| Total |           | 2989631 | 177601 |        |



HPLC data of 8s

**<Chromatogram>**

mAU

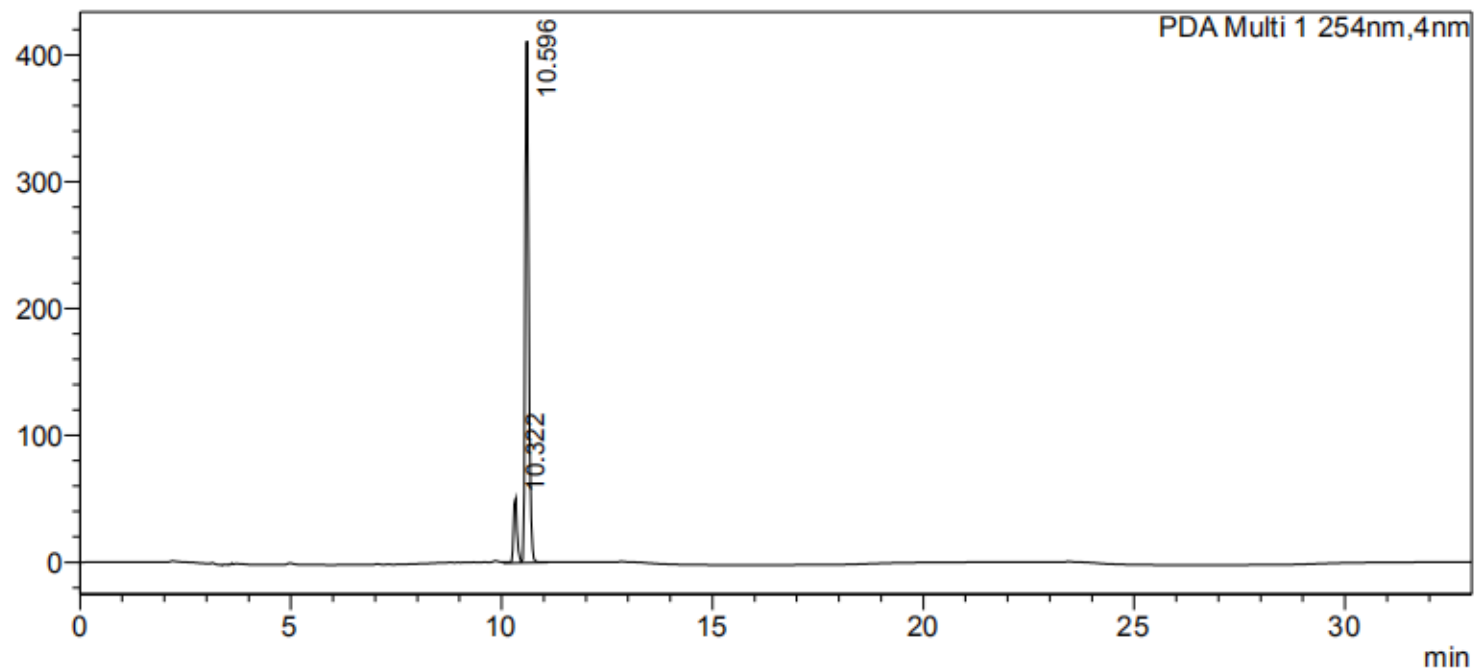

**<Peak Table>**

PDA Ch1 254nm

| Peak# | Ret. Time | Area    | Height | Conc.  |
|-------|-----------|---------|--------|--------|
| 1     | 10.322    | 303715  | 50778  | 11.508 |
| 2     | 10.596    | 2335408 | 411193 | 88.492 |
| Total |           | 2639124 | 461971 |        |

HPLC data of 8t

### <Chromatogram>

mAU

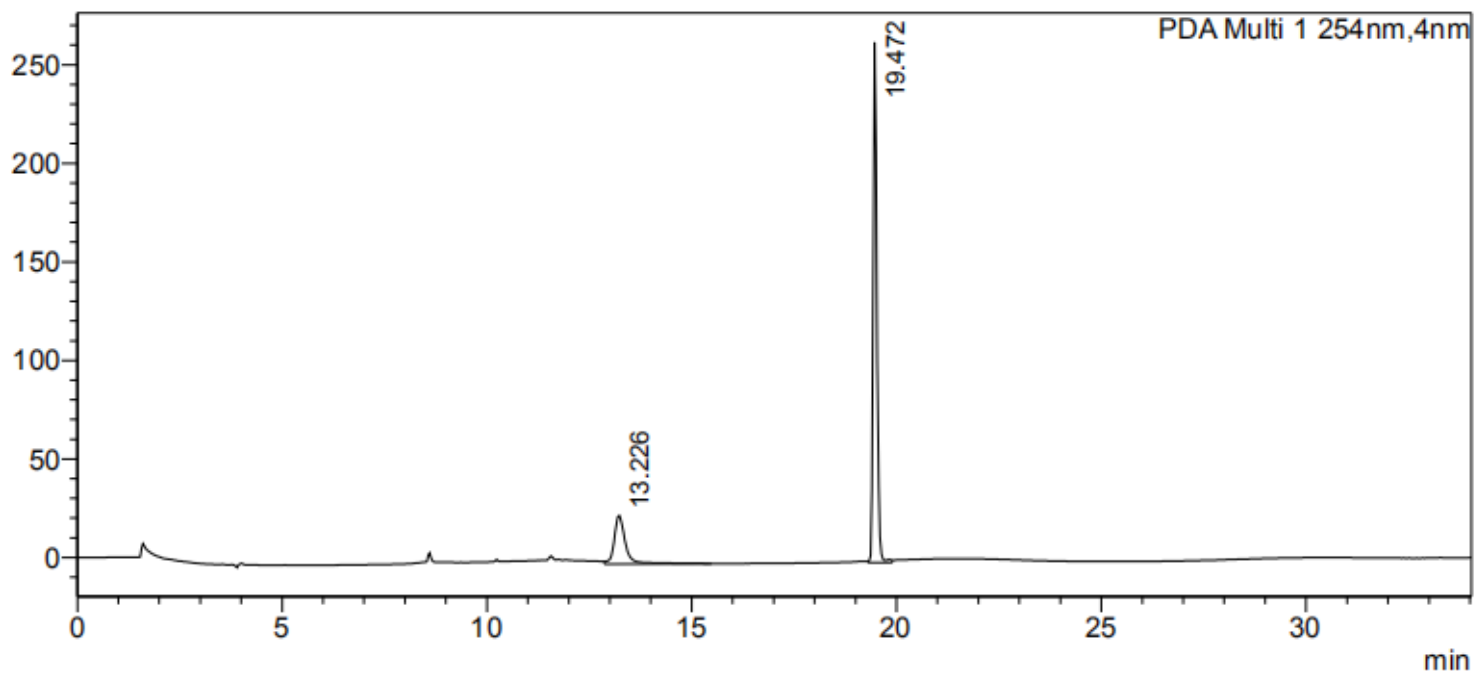

### <Peak Table>

PDA Ch1 254nm

| Peak# | Ret. Time | Area    | Height | Conc.  |
|-------|-----------|---------|--------|--------|
| 1     | 13.226    | 465705  | 24557  | 21.631 |
| 2     | 19.472    | 1687295 | 264054 | 78.369 |
| Total |           | 2153000 | 288610 |        |

HPLC data of 8u

### <Chromatogram>

mAU

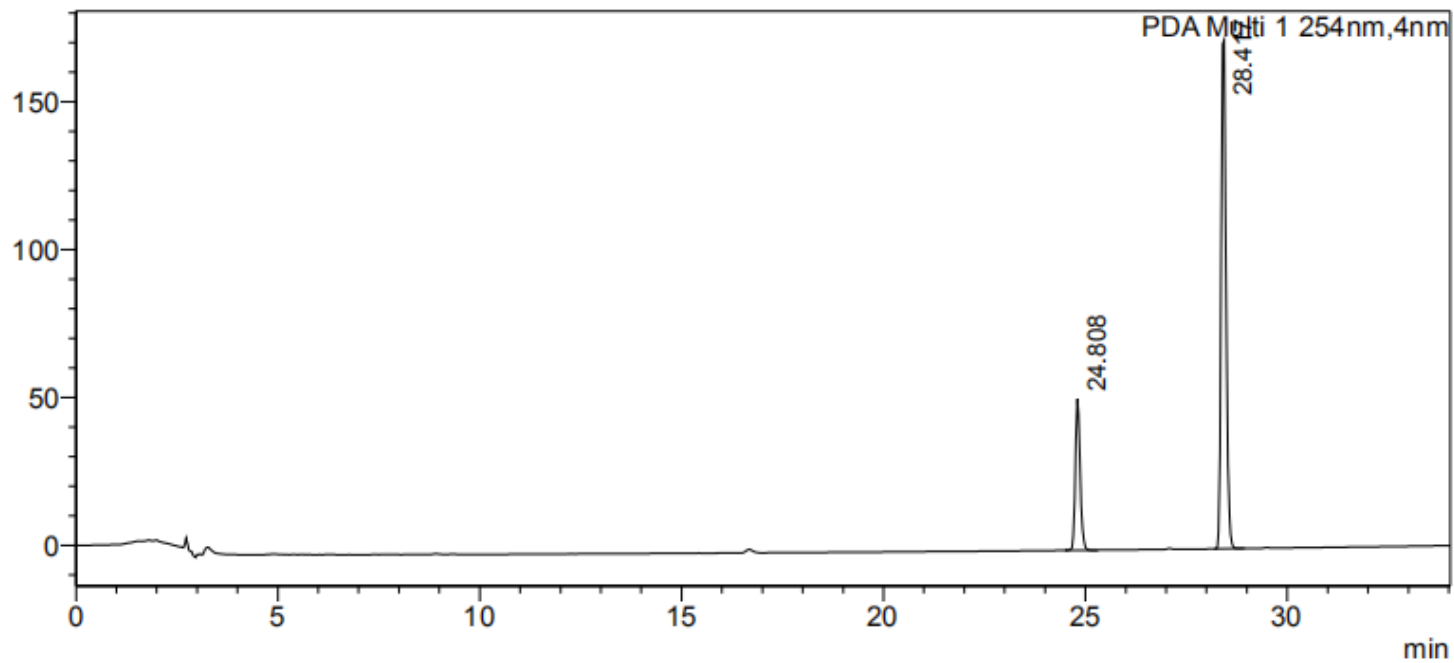

### <Peak Table>

PDA Ch1 254nm

| Peak# | Ret. Time | Area    | Height | Conc.  |
|-------|-----------|---------|--------|--------|
| 1     | 24.808    | 429187  | 51164  | 23.106 |
| 2     | 28.417    | 1428250 | 172030 | 76.894 |
| Total |           | 1857437 | 223194 |        |

HPLC data of 8v

### <Chromatogram>

mAU

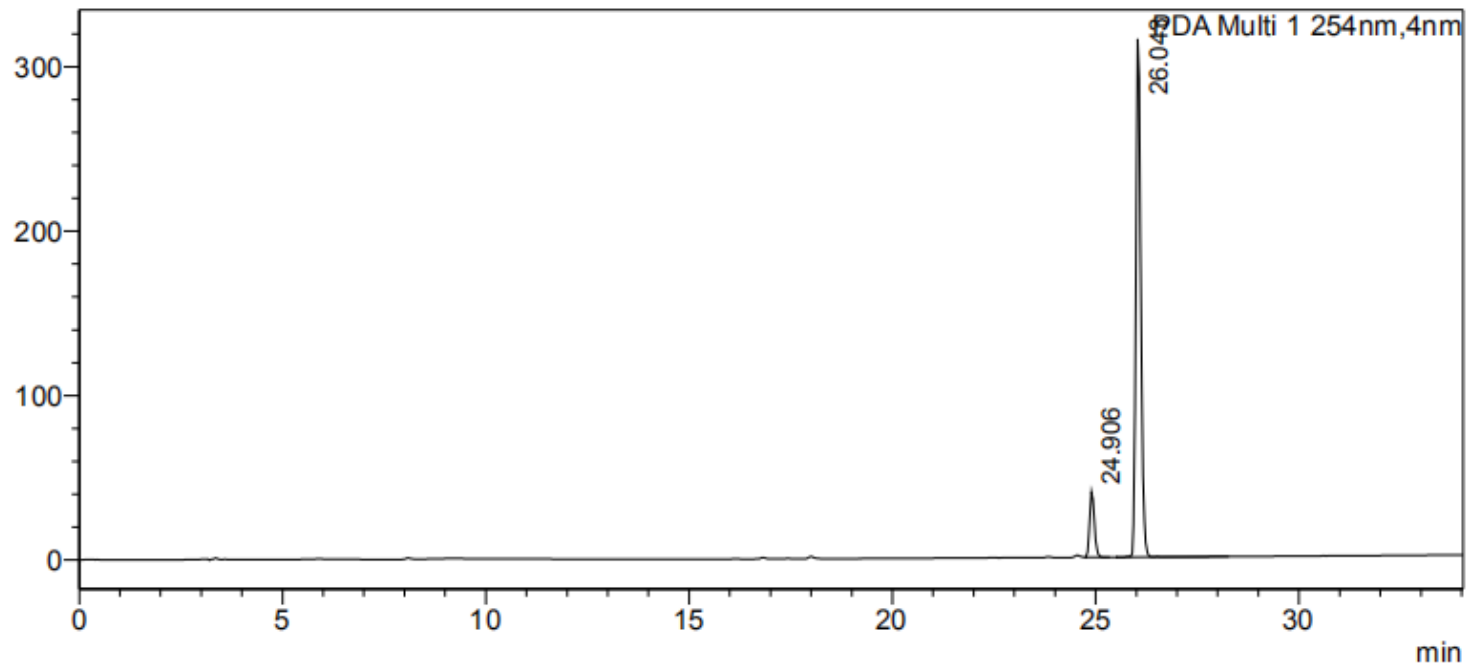

### <Peak Table>

PDA Ch1 254nm

| Peak# | Ret. Time | Area    | Height | Conc.  |
|-------|-----------|---------|--------|--------|
| 1     | 24.906    | 322326  | 39884  | 10.803 |
| 2     | 26.043    | 2661224 | 315428 | 89.197 |
| Total |           | 2983550 | 355312 |        |

HPLC data of 10a

### <Chromatogram>

mAU

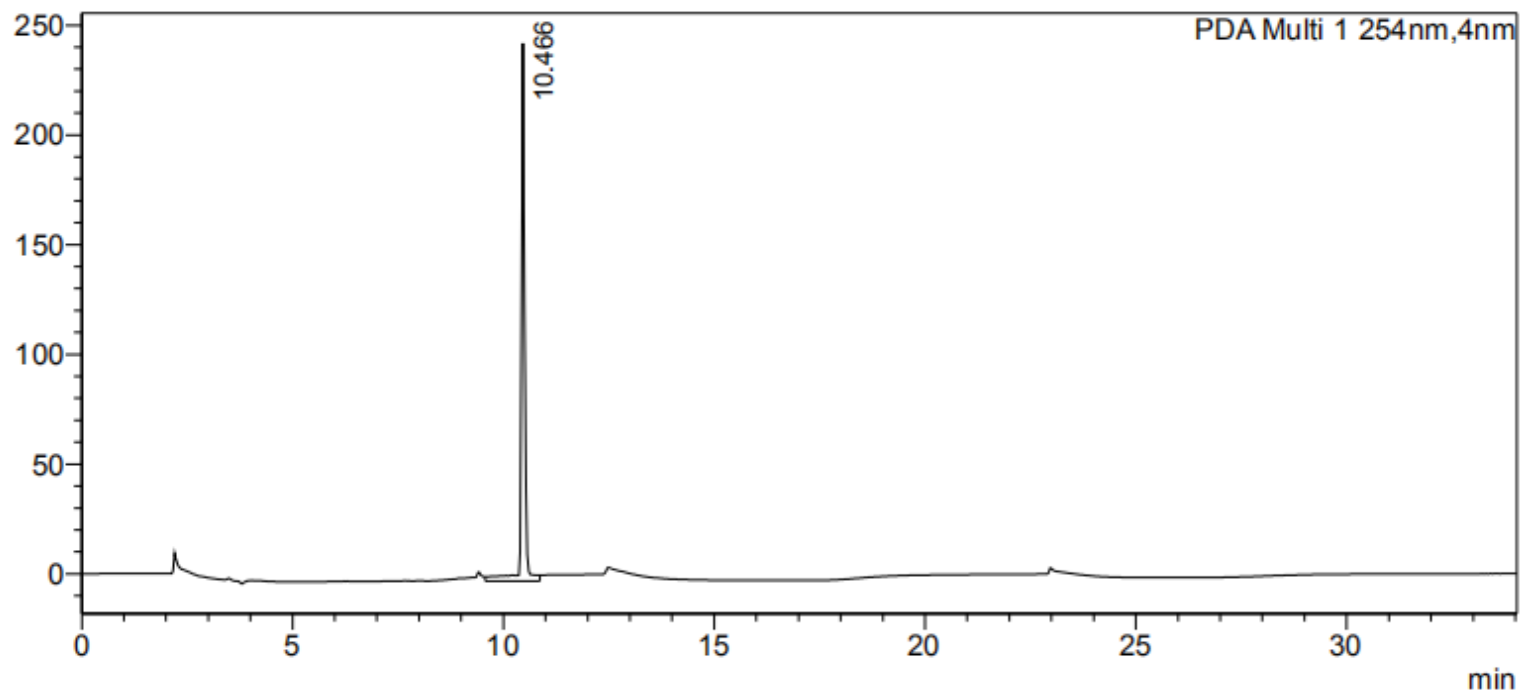

### <Peak Table>

PDA Ch1 254nm

| Peak# | Ret. Time | Area    | Height | Conc.   |
|-------|-----------|---------|--------|---------|
| 1     | 10.466    | 1318244 | 244996 | 100.000 |
| Total |           | 1318244 | 244996 |         |

HPLC data of 10b

### <Chromatogram>

mAU

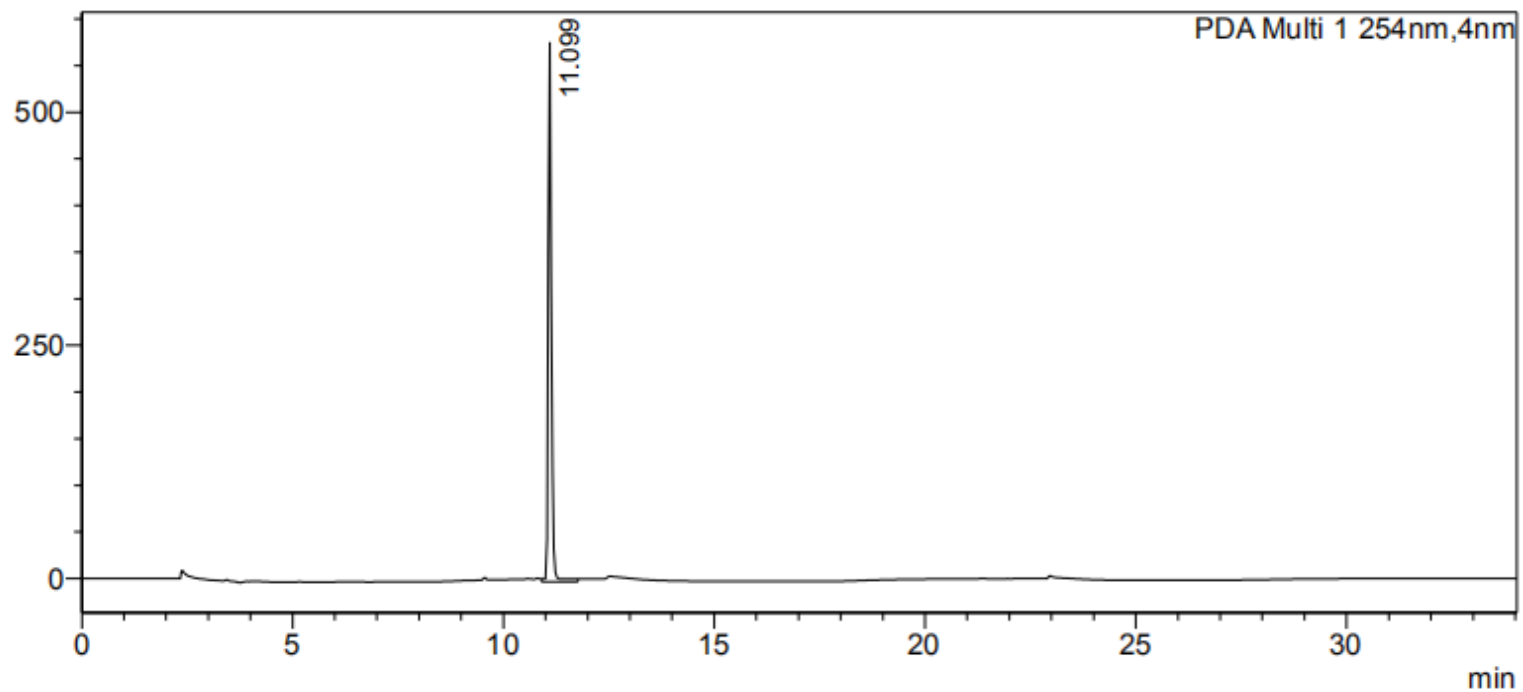

### <Peak Table>

PDA Ch1 254nm

| Peak# | Ret. Time | Area    | Height | Conc.   |
|-------|-----------|---------|--------|---------|
| 1     | 11.099    | 3056200 | 578097 | 100.000 |
| Total |           | 3056200 | 578097 |         |

HPLC data of 10c

### <Chromatogram>

mAU

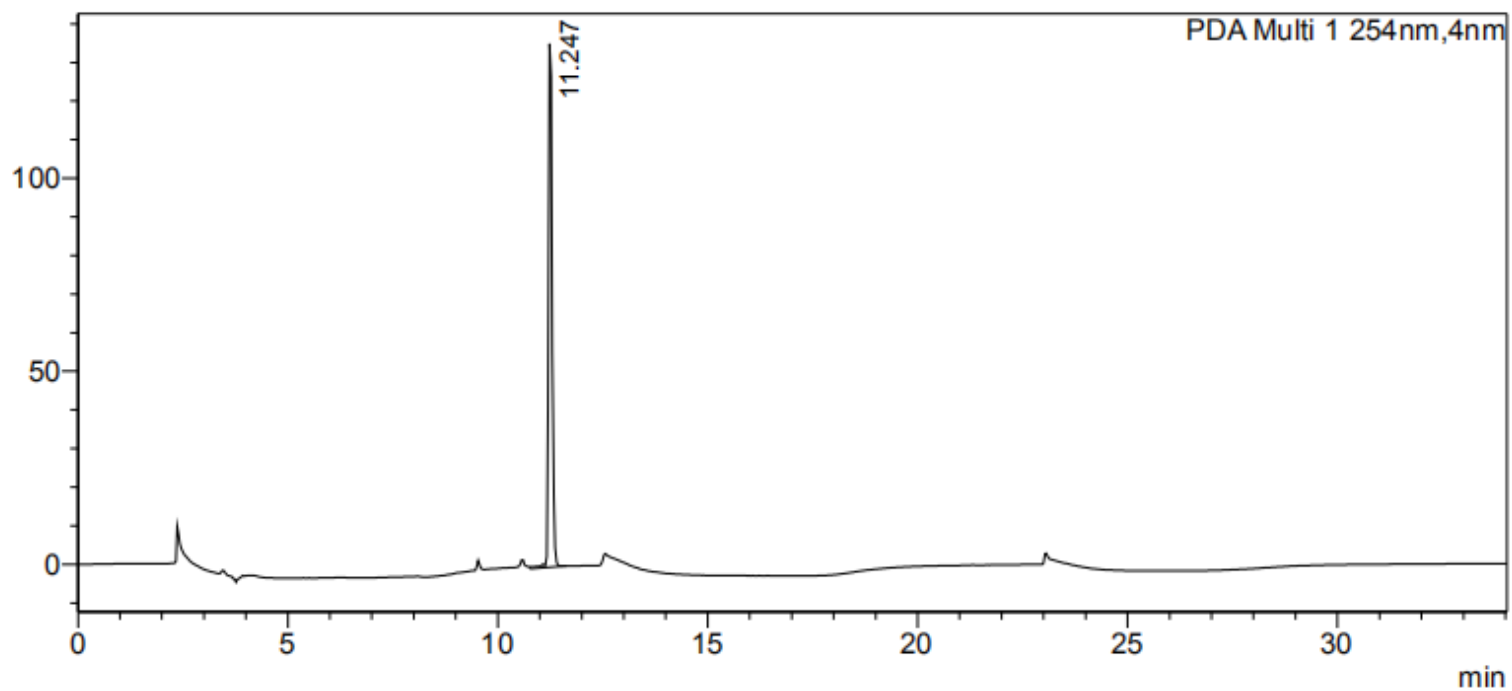

### <Peak Table>

PDA Ch1 254nm

| Peak# | Ret. Time | Area   | Height | Conc.   |
|-------|-----------|--------|--------|---------|
| 1     | 11.247    | 787842 | 135567 | 100.000 |
| Total |           | 787842 | 135567 |         |

HPLC data of 10f

### <Chromatogram>

mAU

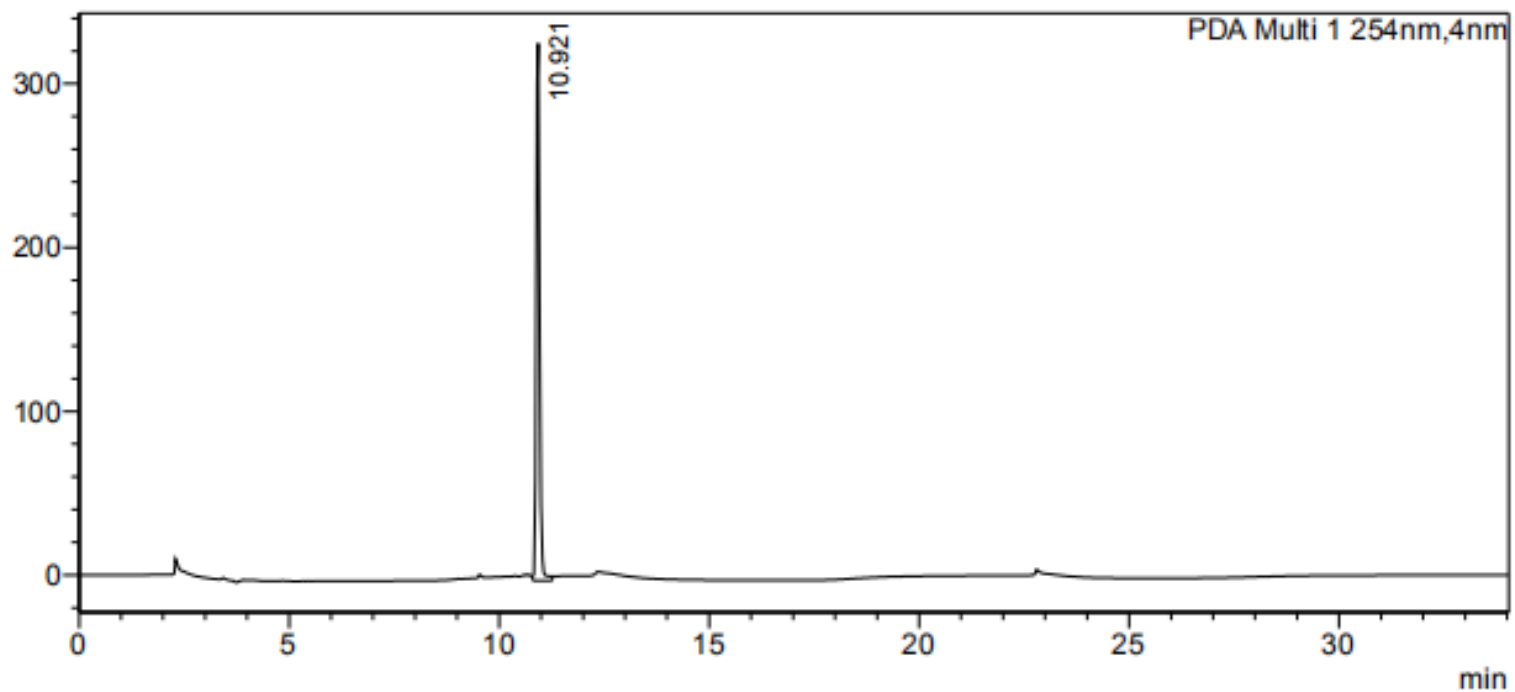

### <Peak Table>

PDA Ch1 254nm

| Peak# | Ret. Time | Area    | Height | Conc.   |
|-------|-----------|---------|--------|---------|
| 1     | 10.921    | 1846185 | 328029 | 100.000 |
| Total |           | 1846185 | 328029 |         |



HPLC data of **12a**

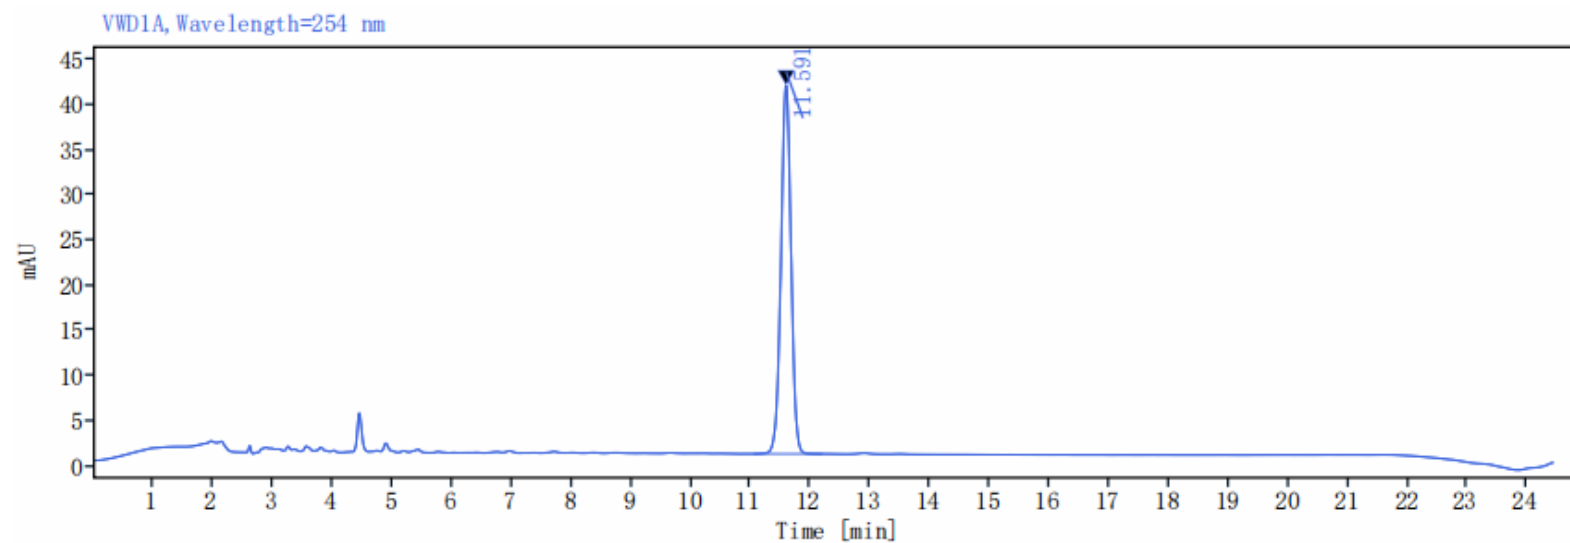

Signal: VWD1A, Wavelength=254 nm

| Retention time [min] | Type | Peak width [min] | Peak area | Height | Peak area (%) | Name |
|----------------------|------|------------------|-----------|--------|---------------|------|
| 11.591               | BB   | 1.15             | 479.34    | 40.82  | 100.00        |      |
|                      | sum  | 1.15             | 479.34    |        |               |      |

HPLC data of **12b**

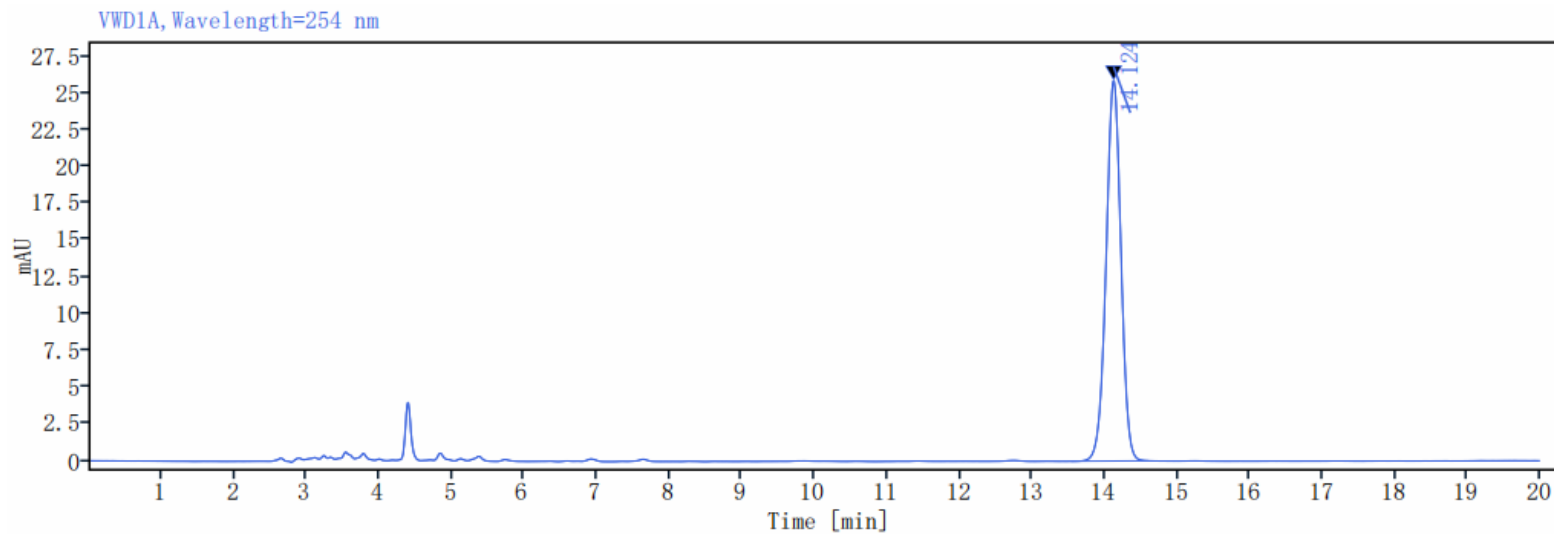

Signal: VWD1A, Wavelength=254 nm

| Retention time [min] | Type | Peak width [min] | Peak area | Height | Peak area (%) | Name |
|----------------------|------|------------------|-----------|--------|---------------|------|
| 14.124               | BM m | 1.06             | 368.43    | 25.86  | 100.00        |      |
|                      | sum  | 1.06             | 368.43    |        |               |      |

HPLC data of **12c**

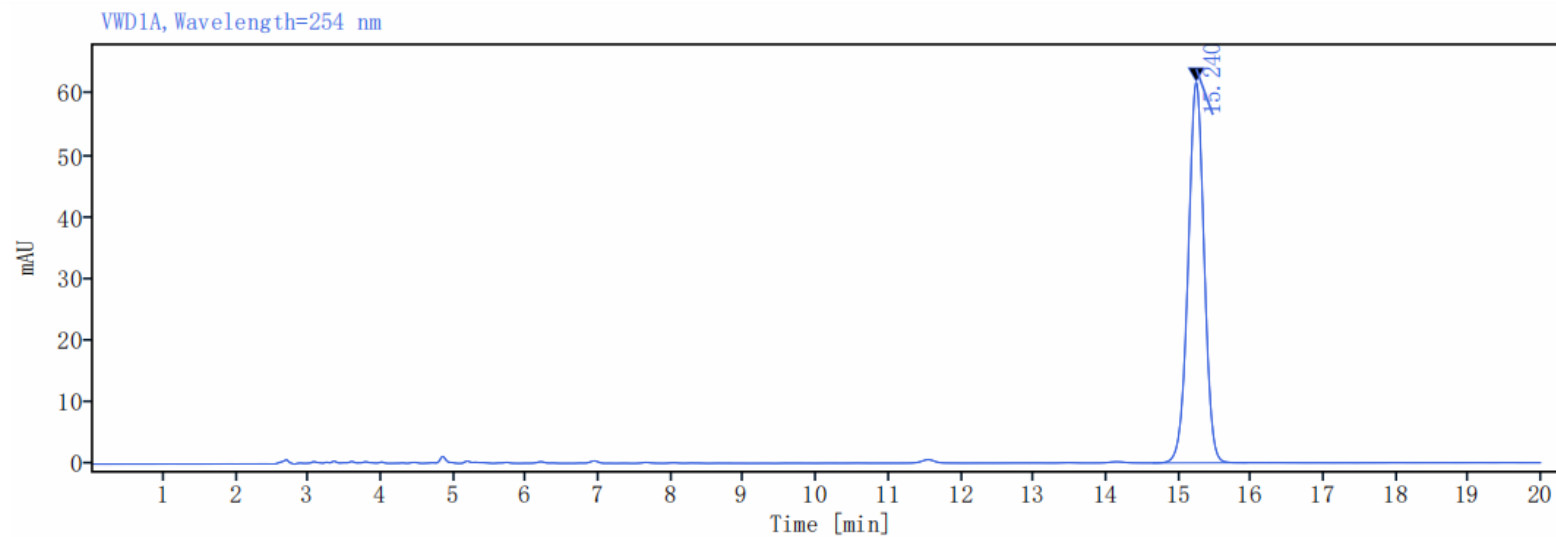

Signal: VWD1A, Wavelength=254 nm

| Retention time [min] | Type | Peak width [min] | Peak area | Height | Peak area (%) | Name |
|----------------------|------|------------------|-----------|--------|---------------|------|
| 15.240               | BB   | 1.31             | 945.02    | 61.71  | 100.00        |      |
|                      | sum  | 1.31             | 945.02    |        |               |      |

HPLC data of **12d**

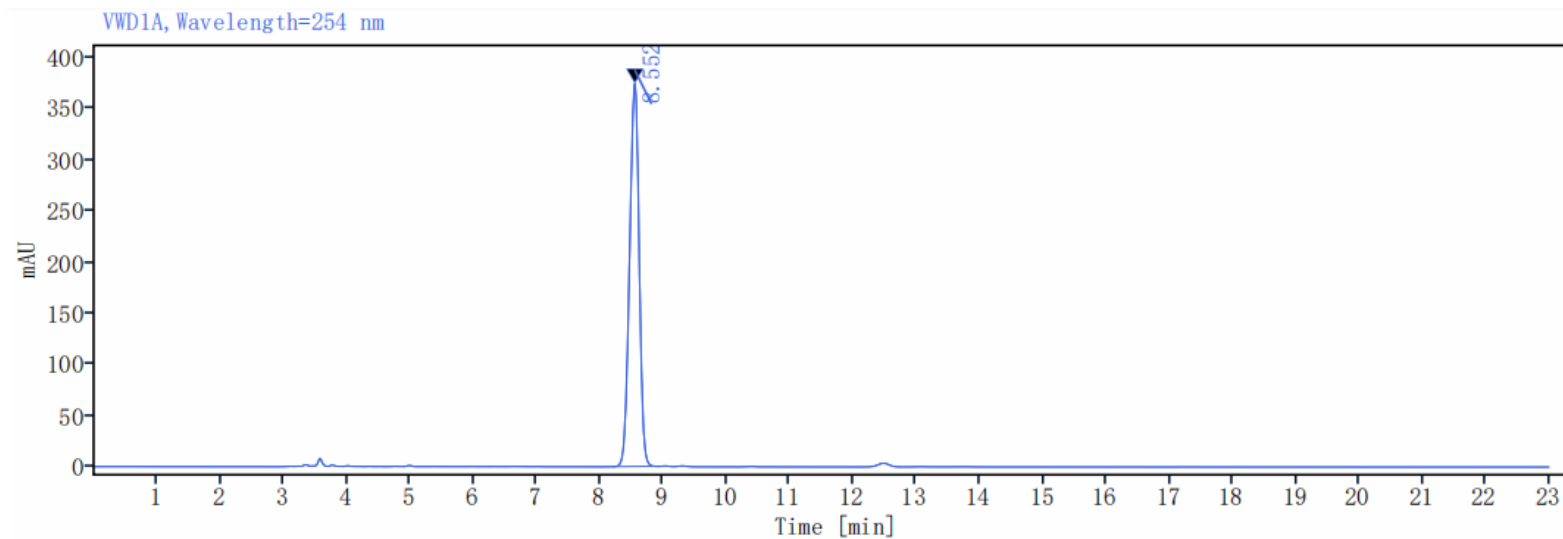

Signal: VWD1A, Wavelength=254 nm

| Retention time [min] | Type | Peak width [min] | Peak area | Height | Peak area (%) | Name |
|----------------------|------|------------------|-----------|--------|---------------|------|
| 8.552                | MM m | 0.79             | 3937.50   | 374.76 | 100.00        |      |
|                      | sum  | 0.79             | 3937.50   |        |               |      |

HPLC data of 12e

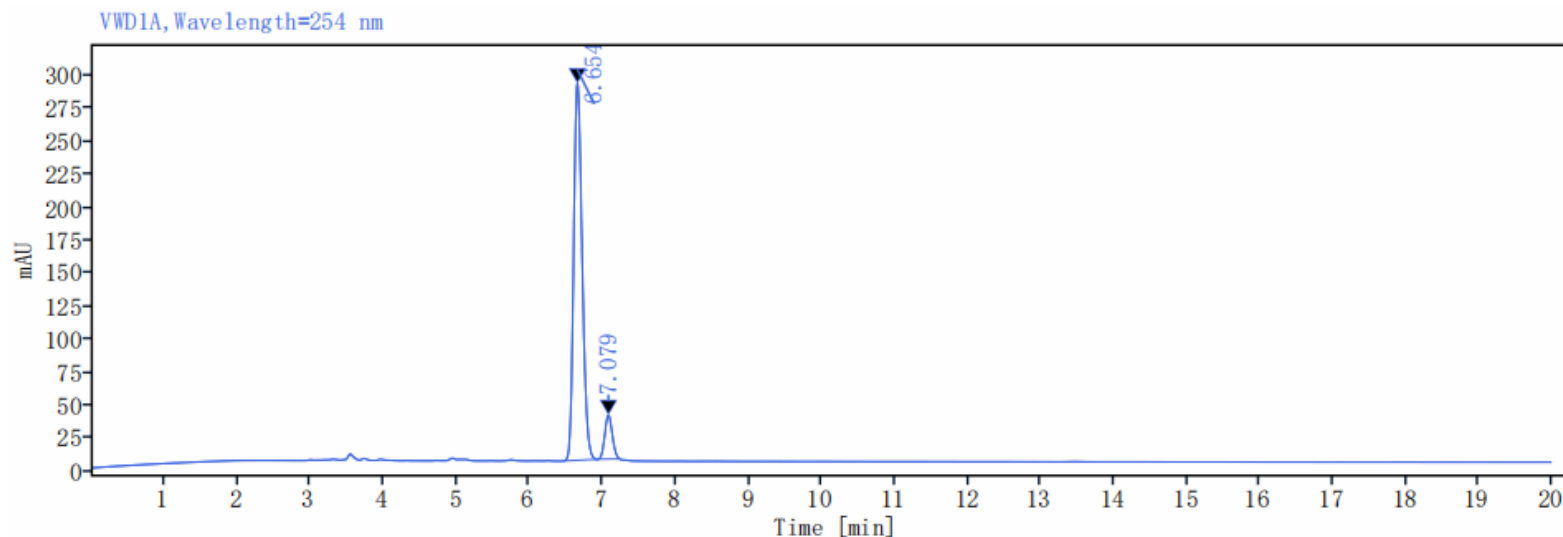

Signal: VWD1A, Wavelength=254 nm

| Retention time [min] | Type | Peak width [min] | Peak area | Height | Peak area (%) | Name |
|----------------------|------|------------------|-----------|--------|---------------|------|
| 6.654                | MM m | 0.48             | 2307.94   | 285.77 | 90.63         |      |
| 7.079                | MM m | 0.29             | 238.50    | 33.34  | 9.37          |      |
|                      | sum  | 0.77             | 2546.43   |        |               |      |

HPLC data of 12g

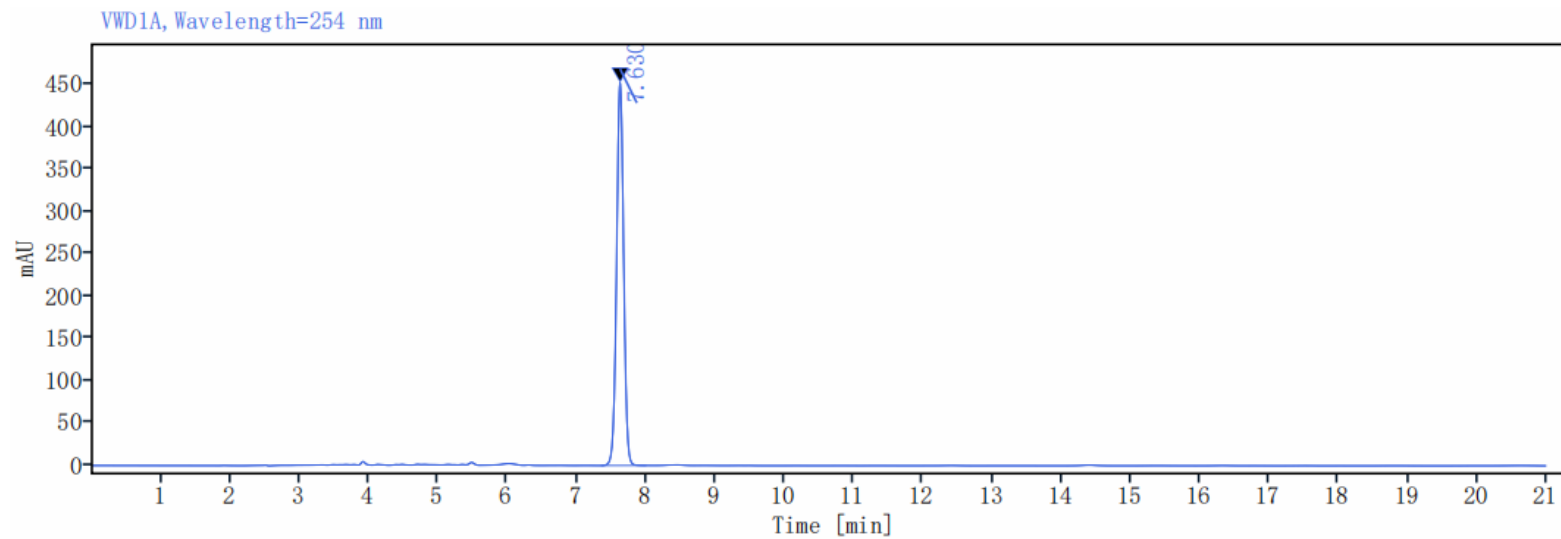

Signal: VWD1A, Wavelength=254 nm

| Retention time [min] | Type | Peak width [min] | Peak area | Height | Peak area (%) | Name |
|----------------------|------|------------------|-----------|--------|---------------|------|
| 7.630                | MM m | 0.65             | 3194.74   | 452.63 | 100.00        |      |
|                      | sum  | 0.65             | 3194.74   |        |               |      |

HPLC data of 12j

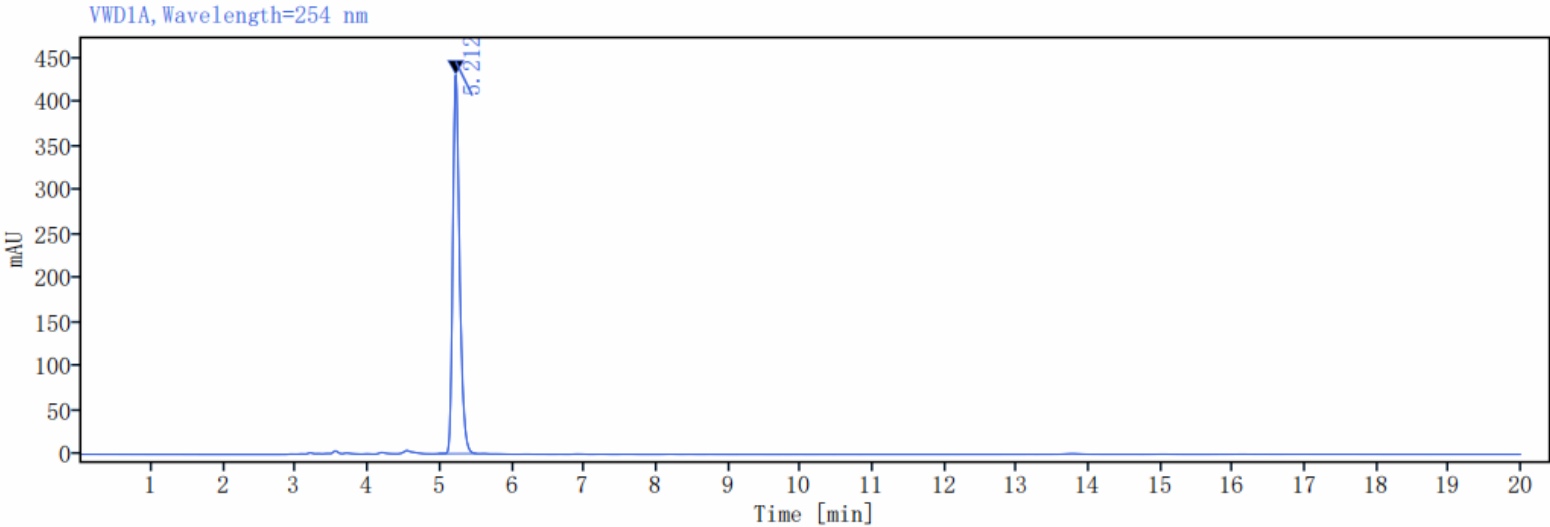

Signal: VWD1A, Wavelength=254 nm

| Retention time [min] | Type | Peak width [min] | Peak area | Height | Peak area (%) | Name |
|----------------------|------|------------------|-----------|--------|---------------|------|
| 5.212                | MM m | 0.52             | 2822.87   | 429.71 | 100.00        |      |
|                      | sum  | 0.52             | 2822.87   |        |               |      |

HPLC data of 12k

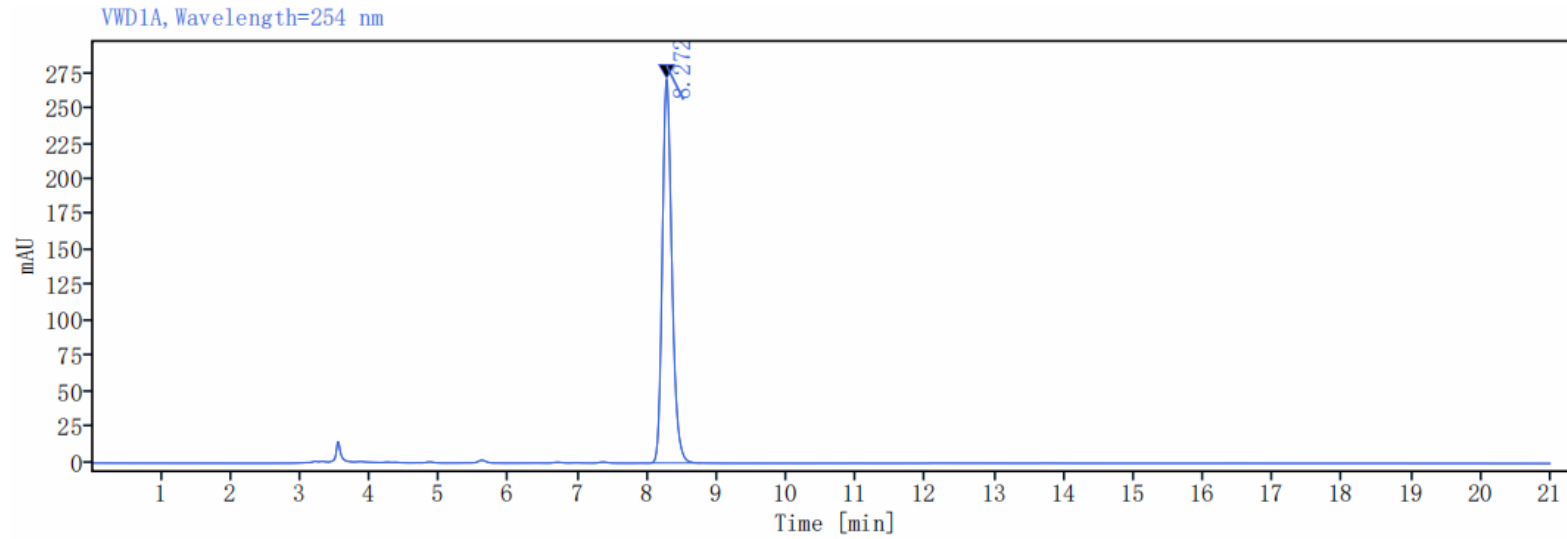

Signal: VWD1A, Wavelength=254 nm

| Retention time [min] | Type | Peak width [min] | Peak area | Height | Peak area (%) | Name |
|----------------------|------|------------------|-----------|--------|---------------|------|
| 8.272                | MM m | 0.71             | 2589.26   | 270.50 | 100.00        |      |
|                      | sum  | 0.71             | 2589.26   |        |               |      |



ORTEP drawing of the X-ray crystallographic structure of compound **8a** (50% probability ellipsoids, **mo\_dd21076\_0m** is the original test number for **8a**):

The single crystal of compound **8a** was prepared from its solution in petroleum ether/ethylacetate (5:1) by slow evaporation of the solvent.

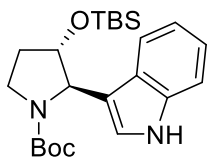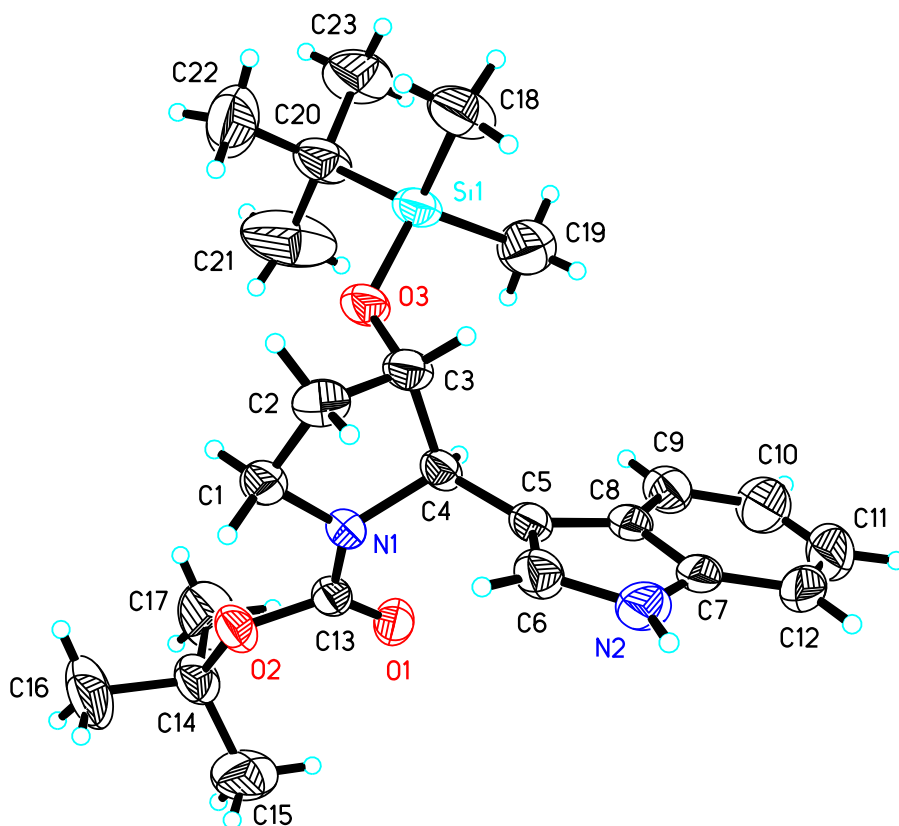

CCDC2171349 contains the supplementary crystallographic data for this paper.  
These data can be obtained free of charge from

The Cambridge Crystallographic Data Centre via [www.ccdc.cam.ac.uk/data\\_request/cif](http://www.ccdc.cam.ac.uk/data_request/cif).

Table 1. Crystal data and structure refinement for mo\_dd21076\_0m.

|                                   |                                                                  |          |
|-----------------------------------|------------------------------------------------------------------|----------|
| Identification code               | mo_dd21076_0m                                                    |          |
| Empirical formula                 | C <sub>23</sub> H <sub>36</sub> N <sub>2</sub> O <sub>3</sub> Si |          |
| Formula weight                    | 416.63                                                           |          |
| Temperature                       | 293(2) K                                                         |          |
| Wavelength                        | 0.71073 Å                                                        |          |
| Crystal system                    | Orthorhombic                                                     |          |
| Space group                       | P 21 21 21                                                       |          |
| Unit cell dimensions              | a = 6.786(2) Å                                                   | α = 90 ° |
|                                   | b = 15.114(5) Å                                                  | β = 90 ° |
|                                   | c = 24.774(8) Å                                                  | γ = 90 ° |
| Volume                            | 2541.0(14) Å <sup>3</sup>                                        |          |
| Z                                 | 4                                                                |          |
| Density (calculated)              | 1.089 Mg/m <sup>3</sup>                                          |          |
| Absorption coefficient            | 0.115 mm <sup>-1</sup>                                           |          |
| F(000)                            | 904                                                              |          |
| Crystal size                      | 0.200 x 0.130 x 0.080 mm <sup>3</sup>                            |          |
| Theta range for data collection   | 2.811 to 25.999 °                                                |          |
| Index ranges                      | -7 ≤ h ≤ 8, -16 ≤ k ≤ 18, -30 ≤ l ≤ 26                           |          |
| Reflections collected             | 12595                                                            |          |
| Independent reflections           | 4958 [R(int) = 0.0344]                                           |          |
| Completeness to theta = 25.242 °  | 99.2 %                                                           |          |
| Absorption correction             | Semi-empirical from equivalents                                  |          |
| Max. and min. transmission        | 0.7456 and 0.6708                                                |          |
| Refinement method                 | Full-matrix least-squares on F <sup>2</sup>                      |          |
| Data / restraints / parameters    | 4958 / 0 / 271                                                   |          |
| Goodness-of-fit on F <sup>2</sup> | 1.016                                                            |          |
| Final R indices [I > 2σ(I)]       | R1 = 0.0489, wR2 = 0.1138                                        |          |
| R indices (all data)              | R1 = 0.0788, wR2 = 0.1339                                        |          |
| Absolute structure parameter      | -0.01(7)                                                         |          |
| Extinction coefficient            | 0.023(5)                                                         |          |
| Largest diff. peak and hole       | 0.286 and -0.180 e.Å <sup>-3</sup>                               |          |

Table 2. Atomic coordinates ( $\times 10^4$ ) and equivalent isotropic displacement parameters ( $\text{\AA}^2 \times 10^3$ ) for mo\_dd21076\_0m.  $U(\text{eq})$  is defined as one third of the trace of the orthogonalized  $U^{ij}$  tensor.

|       | x        | y       | z       | $U(\text{eq})$ |
|-------|----------|---------|---------|----------------|
| Si(1) | 4814(2)  | 4627(1) | 2868(1) | 70(1)          |
| O(1)  | 7425(4)  | 5226(2) | 5033(1) | 66(1)          |
| O(2)  | 5076(4)  | 4280(2) | 5356(1) | 71(1)          |
| O(3)  | 3987(5)  | 4661(2) | 3491(1) | 80(1)          |
| N(1)  | 4378(4)  | 5133(2) | 4657(1) | 53(1)          |
| N(2)  | 3942(6)  | 8050(2) | 4552(1) | 82(1)          |
| C(1)  | 2502(5)  | 4670(3) | 4585(1) | 68(1)          |
| C(2)  | 1568(6)  | 5155(3) | 4118(2) | 78(1)          |
| C(3)  | 3325(6)  | 5420(3) | 3777(1) | 68(1)          |
| C(4)  | 4870(6)  | 5705(2) | 4194(1) | 54(1)          |
| C(5)  | 4845(6)  | 6678(2) | 4312(1) | 55(1)          |
| C(6)  | 3452(7)  | 7169(3) | 4570(1) | 74(1)          |
| C(7)  | 5662(7)  | 8144(2) | 4280(1) | 67(1)          |
| C(8)  | 6293(5)  | 7289(2) | 4125(1) | 57(1)          |
| C(9)  | 8098(6)  | 7207(3) | 3855(2) | 76(1)          |
| C(10) | 9185(9)  | 7941(5) | 3752(2) | 112(2)         |
| C(11) | 8531(12) | 8769(5) | 3904(3) | 130(3)         |
| C(12) | 6803(11) | 8890(3) | 4169(2) | 100(2)         |
| C(13) | 5778(6)  | 4910(2) | 5015(1) | 56(1)          |
| C(14) | 6382(7)  | 3762(3) | 5699(2) | 79(1)          |
| C(15) | 7384(10) | 4323(4) | 6119(2) | 125(2)         |
| C(16) | 4971(11) | 3112(4) | 5958(2) | 138(2)         |
| C(17) | 7853(11) | 3280(4) | 5352(3) | 133(2)         |
| C(18) | 3017(9)  | 5141(4) | 2399(2) | 115(2)         |
| C(19) | 7145(10) | 5287(4) | 2814(2) | 135(2)         |
| C(20) | 5236(9)  | 3442(3) | 2738(2) | 95(2)          |
| C(21) | 6563(17) | 3046(5) | 3162(3) | 210(5)         |
| C(22) | 3143(13) | 2972(4) | 2758(3) | 169(3)         |
| C(23) | 6065(10) | 3277(4) | 2175(2) | 129(2)         |

Table 3. Bond lengths [ $\text{\AA}$ ] and angles [ $^\circ$ ] for mo\_dd21076\_0m.

---

|             |          |
|-------------|----------|
| Si(1)-O(3)  | 1.644(2) |
| Si(1)-C(20) | 1.842(4) |
| Si(1)-C(18) | 1.854(5) |
| Si(1)-C(19) | 1.875(6) |
| O(1)-C(13)  | 1.216(4) |
| O(2)-C(13)  | 1.358(4) |
| O(2)-C(14)  | 1.457(5) |
| O(3)-C(3)   | 1.421(4) |
| N(1)-C(13)  | 1.343(4) |
| N(1)-C(1)   | 1.464(4) |
| N(1)-C(4)   | 1.474(4) |
| N(2)-C(7)   | 1.356(5) |
| N(2)-C(6)   | 1.373(5) |
| N(2)-H(2)   | 0.8600   |
| C(1)-C(2)   | 1.508(5) |
| C(1)-H(1A)  | 0.9700   |
| C(1)-H(1B)  | 0.9700   |
| C(2)-C(3)   | 1.516(6) |
| C(2)-H(2A)  | 0.9700   |
| C(2)-H(2B)  | 0.9700   |
| C(3)-C(4)   | 1.535(5) |
| C(3)-H(3)   | 0.9800   |
| C(4)-C(5)   | 1.499(4) |
| C(4)-H(4)   | 0.9800   |
| C(5)-C(6)   | 1.362(5) |
| C(5)-C(8)   | 1.426(5) |
| C(6)-H(6)   | 0.9300   |
| C(7)-C(12)  | 1.395(7) |
| C(7)-C(8)   | 1.414(5) |
| C(8)-C(9)   | 1.401(5) |
| C(9)-C(10)  | 1.357(7) |
| C(9)-H(9)   | 0.9300   |
| C(10)-C(11) | 1.380(9) |
| C(10)-H(10) | 0.9300   |

|                  |            |
|------------------|------------|
| C(11)-C(12)      | 1.356(9)   |
| C(11)-H(11)      | 0.9300     |
| C(12)-H(12)      | 0.9300     |
| C(14)-C(15)      | 1.505(6)   |
| C(14)-C(17)      | 1.506(7)   |
| C(14)-C(16)      | 1.514(7)   |
| C(15)-H(15A)     | 0.9600     |
| C(15)-H(15B)     | 0.9600     |
| C(15)-H(15C)     | 0.9600     |
| C(16)-H(16A)     | 0.9600     |
| C(16)-H(16B)     | 0.9600     |
| C(16)-H(16C)     | 0.9600     |
| C(17)-H(17A)     | 0.9600     |
| C(17)-H(17B)     | 0.9600     |
| C(17)-H(17C)     | 0.9600     |
| C(18)-H(18A)     | 0.9600     |
| C(18)-H(18B)     | 0.9600     |
| C(18)-H(18C)     | 0.9600     |
| C(19)-H(19A)     | 0.9600     |
| C(19)-H(19B)     | 0.9600     |
| C(19)-H(19C)     | 0.9600     |
| C(20)-C(21)      | 1.508(8)   |
| C(20)-C(23)      | 1.525(6)   |
| C(20)-C(22)      | 1.589(9)   |
| C(21)-H(21A)     | 0.9600     |
| C(21)-H(21B)     | 0.9600     |
| C(21)-H(21C)     | 0.9600     |
| C(22)-H(22A)     | 0.9600     |
| C(22)-H(22B)     | 0.9600     |
| C(22)-H(22C)     | 0.9600     |
| C(23)-H(23A)     | 0.9600     |
| C(23)-H(23B)     | 0.9600     |
| C(23)-H(23C)     | 0.9600     |
| O(3)-Si(1)-C(20) | 104.32(17) |
| O(3)-Si(1)-C(18) | 110.5(2)   |

|                   |          |
|-------------------|----------|
| C(20)-Si(1)-C(18) | 113.6(2) |
| O(3)-Si(1)-C(19)  | 109.8(2) |
| C(20)-Si(1)-C(19) | 111.9(3) |
| C(18)-Si(1)-C(19) | 106.7(3) |
| C(13)-O(2)-C(14)  | 121.7(3) |
| C(3)-O(3)-Si(1)   | 126.9(2) |
| C(13)-N(1)-C(1)   | 125.2(3) |
| C(13)-N(1)-C(4)   | 120.0(3) |
| C(1)-N(1)-C(4)    | 112.5(3) |
| C(7)-N(2)-C(6)    | 109.0(3) |
| C(7)-N(2)-H(2)    | 125.5    |
| C(6)-N(2)-H(2)    | 125.5    |
| N(1)-C(1)-C(2)    | 103.1(3) |
| N(1)-C(1)-H(1A)   | 111.1    |
| C(2)-C(1)-H(1A)   | 111.1    |
| N(1)-C(1)-H(1B)   | 111.1    |
| C(2)-C(1)-H(1B)   | 111.1    |
| H(1A)-C(1)-H(1B)  | 109.1    |
| C(1)-C(2)-C(3)    | 103.0(3) |
| C(1)-C(2)-H(2A)   | 111.2    |
| C(3)-C(2)-H(2A)   | 111.2    |
| C(1)-C(2)-H(2B)   | 111.2    |
| C(3)-C(2)-H(2B)   | 111.2    |
| H(2A)-C(2)-H(2B)  | 109.1    |
| O(3)-C(3)-C(2)    | 108.2(3) |
| O(3)-C(3)-C(4)    | 110.3(3) |
| C(2)-C(3)-C(4)    | 103.6(3) |
| O(3)-C(3)-H(3)    | 111.5    |
| C(2)-C(3)-H(3)    | 111.5    |
| C(4)-C(3)-H(3)    | 111.5    |
| N(1)-C(4)-C(5)    | 114.9(2) |
| N(1)-C(4)-C(3)    | 101.8(3) |
| C(5)-C(4)-C(3)    | 113.5(3) |
| N(1)-C(4)-H(4)    | 108.8    |
| C(5)-C(4)-H(4)    | 108.8    |
| C(3)-C(4)-H(4)    | 108.8    |

|                     |          |
|---------------------|----------|
| C(6)-C(5)-C(8)      | 106.1(3) |
| C(6)-C(5)-C(4)      | 129.4(4) |
| C(8)-C(5)-C(4)      | 124.3(3) |
| C(5)-C(6)-N(2)      | 110.2(4) |
| C(5)-C(6)-H(6)      | 124.9    |
| N(2)-C(6)-H(6)      | 124.9    |
| N(2)-C(7)-C(12)     | 131.3(5) |
| N(2)-C(7)-C(8)      | 107.5(3) |
| C(12)-C(7)-C(8)     | 121.1(5) |
| C(9)-C(8)-C(7)      | 118.4(4) |
| C(9)-C(8)-C(5)      | 134.5(4) |
| C(7)-C(8)-C(5)      | 107.1(3) |
| C(10)-C(9)-C(8)     | 119.5(5) |
| C(10)-C(9)-H(9)     | 120.2    |
| C(8)-C(9)-H(9)      | 120.2    |
| C(9)-C(10)-C(11)    | 121.0(6) |
| C(9)-C(10)-H(10)    | 119.5    |
| C(11)-C(10)-H(10)   | 119.5    |
| C(12)-C(11)-C(10)   | 122.2(5) |
| C(12)-C(11)-H(11)   | 118.9    |
| C(10)-C(11)-H(11)   | 118.9    |
| C(11)-C(12)-C(7)    | 117.8(5) |
| C(11)-C(12)-H(12)   | 121.1    |
| C(7)-C(12)-H(12)    | 121.1    |
| O(1)-C(13)-N(1)     | 125.2(3) |
| O(1)-C(13)-O(2)     | 125.0(3) |
| N(1)-C(13)-O(2)     | 109.8(3) |
| O(2)-C(14)-C(15)    | 112.1(4) |
| O(2)-C(14)-C(17)    | 109.3(4) |
| C(15)-C(14)-C(17)   | 111.6(5) |
| O(2)-C(14)-C(16)    | 102.2(4) |
| C(15)-C(14)-C(16)   | 111.0(4) |
| C(17)-C(14)-C(16)   | 110.3(4) |
| C(14)-C(15)-H(15A)  | 109.5    |
| C(14)-C(15)-H(15B)  | 109.5    |
| H(15A)-C(15)-H(15B) | 109.5    |

|                     |          |
|---------------------|----------|
| C(14)-C(15)-H(15C)  | 109.5    |
| H(15A)-C(15)-H(15C) | 109.5    |
| H(15B)-C(15)-H(15C) | 109.5    |
| C(14)-C(16)-H(16A)  | 109.5    |
| C(14)-C(16)-H(16B)  | 109.5    |
| H(16A)-C(16)-H(16B) | 109.5    |
| C(14)-C(16)-H(16C)  | 109.5    |
| H(16A)-C(16)-H(16C) | 109.5    |
| H(16B)-C(16)-H(16C) | 109.5    |
| C(14)-C(17)-H(17A)  | 109.5    |
| C(14)-C(17)-H(17B)  | 109.5    |
| H(17A)-C(17)-H(17B) | 109.5    |
| C(14)-C(17)-H(17C)  | 109.5    |
| H(17A)-C(17)-H(17C) | 109.5    |
| H(17B)-C(17)-H(17C) | 109.5    |
| Si(1)-C(18)-H(18A)  | 109.5    |
| Si(1)-C(18)-H(18B)  | 109.5    |
| H(18A)-C(18)-H(18B) | 109.5    |
| Si(1)-C(18)-H(18C)  | 109.5    |
| H(18A)-C(18)-H(18C) | 109.5    |
| H(18B)-C(18)-H(18C) | 109.5    |
| Si(1)-C(19)-H(19A)  | 109.5    |
| Si(1)-C(19)-H(19B)  | 109.5    |
| H(19A)-C(19)-H(19B) | 109.5    |
| Si(1)-C(19)-H(19C)  | 109.5    |
| H(19A)-C(19)-H(19C) | 109.5    |
| H(19B)-C(19)-H(19C) | 109.5    |
| C(21)-C(20)-C(23)   | 110.6(5) |
| C(21)-C(20)-C(22)   | 109.5(6) |
| C(23)-C(20)-C(22)   | 106.6(5) |
| C(21)-C(20)-Si(1)   | 110.9(4) |
| C(23)-C(20)-Si(1)   | 112.1(4) |
| C(22)-C(20)-Si(1)   | 106.9(4) |
| C(20)-C(21)-H(21A)  | 109.5    |
| C(20)-C(21)-H(21B)  | 109.5    |
| H(21A)-C(21)-H(21B) | 109.5    |



|                     |       |
|---------------------|-------|
| C(20)-C(21)-H(21C)  | 109.5 |
| H(21A)-C(21)-H(21C) | 109.5 |
| H(21B)-C(21)-H(21C) | 109.5 |
| C(20)-C(22)-H(22A)  | 109.5 |
| C(20)-C(22)-H(22B)  | 109.5 |
| H(22A)-C(22)-H(22B) | 109.5 |
| C(20)-C(22)-H(22C)  | 109.5 |
| H(22A)-C(22)-H(22C) | 109.5 |
| H(22B)-C(22)-H(22C) | 109.5 |
| C(20)-C(23)-H(23A)  | 109.5 |
| C(20)-C(23)-H(23B)  | 109.5 |
| H(23A)-C(23)-H(23B) | 109.5 |
| C(20)-C(23)-H(23C)  | 109.5 |
| H(23A)-C(23)-H(23C) | 109.5 |
| H(23B)-C(23)-H(23C) | 109.5 |

---

Symmetry transformations used to generate equivalent atoms:

Table 4. Anisotropic displacement parameters ( $\text{\AA}^2 \times 10^3$ ) for mo\_dd21076\_0m. The anisotropic displacement factor exponent takes the form:  $-2\pi^2 [ h^2 a^{*2} U^{11} + \dots + 2 h k a^* b^* U^{12} ]$

|       | U <sup>11</sup> | U <sup>22</sup> | U <sup>33</sup> | U <sup>23</sup> | U <sup>13</sup> | U <sup>12</sup> |
|-------|-----------------|-----------------|-----------------|-----------------|-----------------|-----------------|
| Si(1) | 94(1)           | 74(1)           | 43(1)           | -3(1)           | -1(1)           | 6(1)            |
| O(1)  | 68(2)           | 57(2)           | 74(2)           | 5(1)            | -5(1)           | -9(1)           |
| O(2)  | 81(2)           | 73(2)           | 58(1)           | 20(1)           | 0(1)            | -6(2)           |
| O(3)  | 131(2)          | 62(2)           | 46(1)           | -7(1)           | 9(1)            | 3(2)            |
| N(1)  | 62(2)           | 54(2)           | 43(1)           | 4(1)            | 4(1)            | -3(1)           |
| N(2)  | 122(3)          | 58(2)           | 66(2)           | -11(2)          | 0(2)            | 21(2)           |
| C(1)  | 68(2)           | 80(3)           | 55(2)           | -3(2)           | 9(2)            | -13(2)          |
| C(2)  | 76(2)           | 89(3)           | 69(2)           | -8(2)           | -11(2)          | 2(2)            |
| C(3)  | 101(3)          | 57(2)           | 47(2)           | -3(2)           | -4(2)           | 13(2)           |
| C(4)  | 68(2)           | 53(2)           | 42(2)           | 4(1)            | 12(2)           | 6(2)            |
| C(5)  | 70(2)           | 54(2)           | 41(1)           | 2(1)            | 4(2)            | 7(2)            |
| C(6)  | 95(3)           | 65(3)           | 61(2)           | -1(2)           | 19(2)           | 8(2)            |
| C(7)  | 102(3)          | 57(2)           | 44(2)           | 2(2)            | -21(2)          | -1(2)           |
| C(8)  | 71(2)           | 60(2)           | 40(2)           | 3(2)            | -13(2)          | 1(2)            |
| C(9)  | 66(3)           | 93(3)           | 68(2)           | 9(2)            | -6(2)           | -11(2)          |
| C(10) | 100(4)          | 134(5)          | 102(4)          | 10(4)           | -11(3)          | -50(4)          |
| C(11) | 164(6)          | 125(6)          | 101(4)          | 32(4)           | -42(4)          | -88(5)          |
| C(12) | 163(5)          | 64(3)           | 73(3)           | 8(2)            | -49(4)          | -25(3)          |
| C(13) | 72(2)           | 47(2)           | 48(2)           | 0(2)            | 5(2)            | 2(2)            |
| C(14) | 97(3)           | 68(3)           | 71(2)           | 21(2)           | -1(2)           | 7(2)            |
| C(15) | 174(6)          | 116(4)          | 85(3)           | 7(3)            | -53(4)          | 22(4)           |
| C(16) | 155(5)          | 129(4)          | 131(4)          | 81(4)           | -6(5)           | -25(5)          |
| C(17) | 167(6)          | 84(4)           | 148(5)          | 17(4)           | 33(5)           | 47(4)           |
| C(18) | 158(5)          | 117(4)          | 70(3)           | 8(3)            | -10(3)          | 34(4)           |
| C(19) | 147(5)          | 159(6)          | 98(4)           | -3(4)           | 6(4)            | -54(5)          |
| C(20) | 148(5)          | 82(3)           | 57(2)           | -5(2)           | 3(3)            | 32(3)           |
| C(21) | 357(13)         | 154(6)          | 120(5)          | -14(4)          | -77(7)          | 151(8)          |
| C(22) | 247(9)          | 108(5)          | 150(6)          | -24(4)          | 53(6)           | -68(6)          |
| C(23) | 178(6)          | 126(4)          | 84(3)           | -33(3)          | 23(4)           | 40(4)           |

Table 5. Hydrogen coordinates ( $\times 10^4$ ) and isotropic displacement parameters ( $\text{\AA}^2 \times 10^{-3}$ ) for mo\_dd21076\_0m.

|        | x     | y    | z    | U(eq) |
|--------|-------|------|------|-------|
| H(2)   | 3267  | 8474 | 4691 | 98    |
| H(1A)  | 1693  | 4711 | 4907 | 81    |
| H(1B)  | 2712  | 4051 | 4498 | 81    |
| H(2A)  | 847   | 5671 | 4242 | 94    |
| H(2B)  | 682   | 4772 | 3919 | 94    |
| H(3)   | 2996  | 5905 | 3530 | 82    |
| H(4)   | 6180  | 5543 | 4061 | 65    |
| H(6)   | 2330  | 6941 | 4735 | 88    |
| H(9)   | 8547  | 6653 | 3747 | 91    |
| H(10)  | 10389 | 7886 | 3576 | 135   |
| H(11)  | 9301  | 9260 | 3822 | 156   |
| H(12)  | 6391  | 9451 | 4273 | 120   |
| H(15A) | 8122  | 4784 | 5945 | 187   |
| H(15B) | 8260  | 3961 | 6329 | 187   |
| H(15C) | 6410  | 4581 | 6352 | 187   |
| H(16A) | 4040  | 3428 | 6177 | 207   |
| H(16B) | 5696  | 2705 | 6179 | 207   |
| H(16C) | 4282  | 2792 | 5681 | 207   |
| H(17A) | 7169  | 2955 | 5076 | 199   |
| H(17B) | 8599  | 2877 | 5571 | 199   |
| H(17C) | 8727  | 3699 | 5186 | 199   |
| H(18A) | 1825  | 4799 | 2397 | 173   |
| H(18B) | 3564  | 5157 | 2042 | 173   |
| H(18C) | 2731  | 5732 | 2517 | 173   |
| H(19A) | 6862  | 5900 | 2877 | 202   |
| H(19B) | 7691  | 5218 | 2459 | 202   |
| H(19C) | 8075  | 5081 | 3077 | 202   |
| H(21A) | 7766  | 3379 | 3181 | 315   |
| H(21B) | 6855  | 2444 | 3070 | 315   |
| H(21C) | 5913  | 3064 | 3506 | 315   |

|        |      |      |      |     |
|--------|------|------|------|-----|
| H(22A) | 2429 | 3176 | 3069 | 253 |
| H(22B) | 3319 | 2343 | 2781 | 253 |
| H(22C) | 2416 | 3114 | 2437 | 253 |
| H(23A) | 5240 | 3560 | 1911 | 194 |
| H(23B) | 6102 | 2652 | 2106 | 194 |
| H(23C) | 7374 | 3514 | 2152 | 194 |

---

Table 6. Torsion angles [ ° ] for mo\_dd21076\_0m.

---

|                       |           |
|-----------------------|-----------|
| C(20)-Si(1)-O(3)-C(3) | -176.0(4) |
| C(18)-Si(1)-O(3)-C(3) | -53.5(4)  |
| C(19)-Si(1)-O(3)-C(3) | 63.9(4)   |
| C(13)-N(1)-C(1)-C(2)  | -176.9(3) |
| C(4)-N(1)-C(1)-C(2)   | -14.2(4)  |
| N(1)-C(1)-C(2)-C(3)   | 33.3(4)   |
| Si(1)-O(3)-C(3)-C(2)  | 141.8(3)  |
| Si(1)-O(3)-C(3)-C(4)  | -105.6(3) |
| C(1)-C(2)-C(3)-O(3)   | 76.6(4)   |
| C(1)-C(2)-C(3)-C(4)   | -40.5(4)  |
| C(13)-N(1)-C(4)-C(5)  | -83.8(4)  |
| C(1)-N(1)-C(4)-C(5)   | 112.6(3)  |
| C(13)-N(1)-C(4)-C(3)  | 153.1(3)  |
| C(1)-N(1)-C(4)-C(3)   | -10.5(3)  |
| O(3)-C(3)-C(4)-N(1)   | -84.6(3)  |
| C(2)-C(3)-C(4)-N(1)   | 31.0(4)   |
| O(3)-C(3)-C(4)-C(5)   | 151.3(3)  |
| C(2)-C(3)-C(4)-C(5)   | -93.1(4)  |
| N(1)-C(4)-C(5)-C(6)   | -47.9(5)  |
| C(3)-C(4)-C(5)-C(6)   | 68.7(4)   |
| N(1)-C(4)-C(5)-C(8)   | 137.4(3)  |
| C(3)-C(4)-C(5)-C(8)   | -105.9(4) |
| C(8)-C(5)-C(6)-N(2)   | 0.3(4)    |
| C(4)-C(5)-C(6)-N(2)   | -175.1(3) |
| C(7)-N(2)-C(6)-C(5)   | 0.2(4)    |
| C(6)-N(2)-C(7)-C(12)  | -177.4(4) |
| C(6)-N(2)-C(7)-C(8)   | -0.6(4)   |
| N(2)-C(7)-C(8)-C(9)   | -177.3(3) |
| C(12)-C(7)-C(8)-C(9)  | -0.1(5)   |
| N(2)-C(7)-C(8)-C(5)   | 0.8(4)    |
| C(12)-C(7)-C(8)-C(5)  | 178.0(3)  |
| C(6)-C(5)-C(8)-C(9)   | 177.0(4)  |
| C(4)-C(5)-C(8)-C(9)   | -7.3(6)   |
| C(6)-C(5)-C(8)-C(7)   | -0.7(4)   |

|                         |           |
|-------------------------|-----------|
| C(4)-C(5)-C(8)-C(7)     | 175.0(3)  |
| C(7)-C(8)-C(9)-C(10)    | 0.2(5)    |
| C(5)-C(8)-C(9)-C(10)    | -177.3(4) |
| C(8)-C(9)-C(10)-C(11)   | -0.6(7)   |
| C(9)-C(10)-C(11)-C(12)  | 1.0(9)    |
| C(10)-C(11)-C(12)-C(7)  | -0.9(8)   |
| N(2)-C(7)-C(12)-C(11)   | 176.9(4)  |
| C(8)-C(7)-C(12)-C(11)   | 0.5(6)    |
| C(1)-N(1)-C(13)-O(1)    | 170.7(3)  |
| C(4)-N(1)-C(13)-O(1)    | 9.3(5)    |
| C(1)-N(1)-C(13)-O(2)    | -9.4(4)   |
| C(4)-N(1)-C(13)-O(2)    | -170.8(3) |
| C(14)-O(2)-C(13)-O(1)   | -15.1(5)  |
| C(14)-O(2)-C(13)-N(1)   | 165.0(3)  |
| C(13)-O(2)-C(14)-C(15)  | 65.9(5)   |
| C(13)-O(2)-C(14)-C(17)  | -58.3(5)  |
| C(13)-O(2)-C(14)-C(16)  | -175.2(4) |
| O(3)-Si(1)-C(20)-C(21)  | -54.4(6)  |
| C(18)-Si(1)-C(20)-C(21) | -174.8(6) |
| C(19)-Si(1)-C(20)-C(21) | 64.3(6)   |
| O(3)-Si(1)-C(20)-C(23)  | -178.6(4) |
| C(18)-Si(1)-C(20)-C(23) | 61.0(5)   |
| C(19)-Si(1)-C(20)-C(23) | -59.9(5)  |
| O(3)-Si(1)-C(20)-C(22)  | 64.9(4)   |
| C(18)-Si(1)-C(20)-C(22) | -55.5(4)  |
| C(19)-Si(1)-C(20)-C(22) | -176.4(4) |

---

Symmetry transformations used to generate equivalent atoms:

Table 7. Hydrogen bonds for mo\_dd21076\_0m [ $\text{\AA}$  and  $^\circ$ ].

| D-H...A             | d(D-H) | d(H...A) | d(D...A) | $\angle(\text{DHA})$ |
|---------------------|--------|----------|----------|----------------------|
| C(17)-H(17C)...O(1) | 0.96   | 2.50     | 3.059(6) | 117.1                |
| C(15)-H(15A)...O(1) | 0.96   | 2.40     | 3.017(6) | 121.4                |
| N(2)-H(2)...O(1)#1  | 0.86   | 2.16     | 2.984(4) | 161.2                |

Symmetry transformations used to generate equivalent atoms:

#1  $x-1/2, -y+3/2, -z+1$

ORTEP drawing of the X-ray crystallographic structure of compound **12g** (50% probability ellipsoids, **mo\_ddz21073\_0m** is the original test number for **12g**):

The single crystal of compound **12g** was prepared from its solution in petroleum ether/ethylacetate (5:1) by slow evaporation of the solvent.

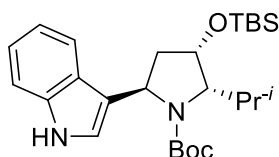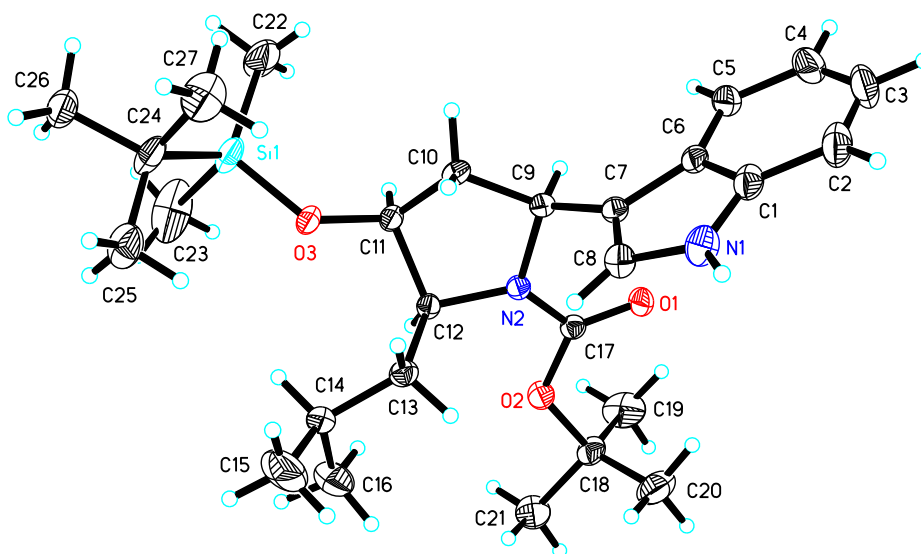

CCDC2171350 contains the supplementary crystallographic data for this paper.  
These data can be obtained free of charge from

The Cambridge Crystallographic Data Centre via [www.ccdc.cam.ac.uk/data\\_request/cif](http://www.ccdc.cam.ac.uk/data_request/cif).



Table 1. Crystal data and structure refinement for mo\_ddz21073\_0m.

|                                   |                                                                  |                  |
|-----------------------------------|------------------------------------------------------------------|------------------|
| Identification code               | mo_ddz21073_0m                                                   |                  |
| Empirical formula                 | C <sub>27</sub> H <sub>44</sub> N <sub>2</sub> O <sub>3</sub> Si |                  |
| Formula weight                    | 472.73                                                           |                  |
| Temperature                       | 213(2) K                                                         |                  |
| Wavelength                        | 0.71073 Å                                                        |                  |
| Crystal system                    | Monoclinic                                                       |                  |
| Space group                       | P 21                                                             |                  |
| Unit cell dimensions              | a = 10.2060(5) Å                                                 | α = 90 °         |
|                                   | b = 11.4624(6) Å                                                 | β = 106.937(2) ° |
|                                   | c = 12.4467(6) Å                                                 | γ = 90 °         |
| Volume                            | 1392.92(12) Å <sup>3</sup>                                       |                  |
| Z                                 | 2                                                                |                  |
| Density (calculated)              | 1.127 Mg/m <sup>3</sup>                                          |                  |
| Absorption coefficient            | 0.113 mm <sup>-1</sup>                                           |                  |
| F(000)                            | 516                                                              |                  |
| Crystal size                      | 0.200 x 0.160 x 0.120 mm <sup>3</sup>                            |                  |
| Theta range for data collection   | 2.466 to 25.999 °                                                |                  |
| Index ranges                      | -12 ≤ h ≤ 12, -14 ≤ k ≤ 14, -15 ≤ l ≤ 15                         |                  |
| Reflections collected             | 22950                                                            |                  |
| Independent reflections           | 5418 [R(int) = 0.0323]                                           |                  |
| Completeness to theta = 25.242 °  | 99.2 %                                                           |                  |
| Absorption correction             | Semi-empirical from equivalents                                  |                  |
| Max. and min. transmission        | 0.7456 and 0.6882                                                |                  |
| Refinement method                 | Full-matrix least-squares on F <sup>2</sup>                      |                  |
| Data / restraints / parameters    | 5418 / 119 / 368                                                 |                  |
| Goodness-of-fit on F <sup>2</sup> | 1.044                                                            |                  |
| Final R indices [I > 2σ(I)]       | R1 = 0.0400, wR2 = 0.1032                                        |                  |
| R indices (all data)              | R1 = 0.0435, wR2 = 0.1071                                        |                  |
| Absolute structure parameter      | 0.03(4)                                                          |                  |
| Extinction coefficient            | 0.025(10)                                                        |                  |
| Largest diff. peak and hole       | 0.314 and -0.242 e.Å <sup>-3</sup>                               |                  |

Table 2. Atomic coordinates ( $\times 10^4$ ) and equivalent isotropic displacement parameters ( $\text{\AA}^2 \times 10^3$ ) for mo\_ddz21073\_0m.  $U(\text{eq})$  is defined as one third of the trace of the orthogonalized  $U^{ij}$  tensor.

|       | x        | y        | z        | $U(\text{eq})$ |
|-------|----------|----------|----------|----------------|
| Si(1) | 3631(1)  | 3840(1)  | 3696(1)  | 50(1)          |
| O(1)  | 2784(2)  | 3568(2)  | 9216(1)  | 36(1)          |
| O(2)  | 886(2)   | 4185(2)  | 7861(2)  | 39(1)          |
| O(3)  | 3313(2)  | 4474(2)  | 4782(1)  | 40(1)          |
| N(1)  | 6160(3)  | 6315(2)  | 9817(2)  | 48(1)          |
| N(2)  | 2917(2)  | 4212(2)  | 7536(2)  | 29(1)          |
| C(1)  | 6789(3)  | 5373(3)  | 10407(2) | 43(1)          |
| C(2)  | 7769(3)  | 5303(4)  | 11456(3) | 60(1)          |
| C(3)  | 8192(4)  | 4225(4)  | 11867(3) | 69(1)          |
| C(4)  | 7679(4)  | 3212(4)  | 11265(3) | 64(1)          |
| C(5)  | 6701(3)  | 3260(3)  | 10228(2) | 45(1)          |
| C(6)  | 6242(2)  | 4359(3)  | 9788(2)  | 34(1)          |
| C(7)  | 5240(2)  | 4755(2)  | 8781(2)  | 31(1)          |
| C(8)  | 5237(3)  | 5936(3)  | 8840(2)  | 41(1)          |
| C(9)  | 4412(2)  | 3995(2)  | 7840(2)  | 30(1)          |
| C(10) | 4711(2)  | 4199(3)  | 6715(2)  | 36(1)          |
| C(11) | 3367(2)  | 3949(2)  | 5826(2)  | 32(1)          |
| C(12) | 2276(2)  | 4448(2)  | 6334(2)  | 28(1)          |
| C(13) | 1954(3)  | 5740(2)  | 6086(2)  | 35(1)          |
| C(14) | 831(4)   | 5980(3)  | 4995(3)  | 52(1)          |
| C(15) | 862(6)   | 7239(4)  | 4660(4)  | 94(2)          |
| C(16) | -588(4)  | 5670(4)  | 5088(4)  | 73(1)          |
| C(17) | 2231(2)  | 3954(2)  | 8283(2)  | 28(1)          |
| C(18) | -34(3)   | 4137(3)  | 8585(2)  | 41(1)          |
| C(19) | -46(4)   | 2933(4)  | 9063(4)  | 70(1)          |
| C(20) | 397(4)   | 5066(4)  | 9481(3)  | 69(1)          |
| C(21) | -1411(3) | 4424(4)  | 7772(3)  | 66(1)          |
| C(22) | 4638(17) | 2553(12) | 4015(10) | 106(5)         |
| C(23) | 1831(11) | 3282(10) | 2743(8)  | 103(4)         |
| C(24) | 4106(15) | 4999(17) | 2881(15) | 54(2)          |
| C(25) | 3214(9)  | 6059(6)  | 2678(7)  | 64(2)          |

|        |          |          |          |        |
|--------|----------|----------|----------|--------|
| C(26)  | 4220(20) | 4614(12) | 1735(14) | 57(3)  |
| C(27)  | 5607(11) | 5317(11) | 3684(9)  | 78(2)  |
| C(22') | 5516(15) | 3152(13) | 4314(10) | 104(5) |
| C(23') | 2560(20) | 2609(15) | 3142(13) | 105(5) |
| C(24') | 3980(20) | 5030(30) | 2790(20) | 58(2)  |
| C(25') | 2542(15) | 5672(13) | 2425(11) | 80(3)  |
| C(26') | 4240(30) | 4343(19) | 1780(20) | 55(3)  |
| C(27') | 5256(13) | 5781(9)  | 3346(9)  | 75(2)  |

---

Table 3. Bond lengths [ $\text{\AA}$ ] and angles [ $^\circ$ ] for mo\_ddz21073\_0m.

---

|              |            |
|--------------|------------|
| Si(1)-O(3)   | 1.6470(18) |
| Si(1)-C(22)  | 1.776(10)  |
| Si(1)-C(23') | 1.794(13)  |
| Si(1)-C(24)  | 1.82(2)    |
| Si(1)-C(24') | 1.87(4)    |
| Si(1)-C(23)  | 1.980(9)   |
| Si(1)-C(22') | 2.014(11)  |
| O(1)-C(17)   | 1.216(3)   |
| O(2)-C(17)   | 1.346(3)   |
| O(2)-C(18)   | 1.480(3)   |
| O(3)-C(11)   | 1.419(3)   |
| N(1)-C(1)    | 1.357(4)   |
| N(1)-C(8)    | 1.374(4)   |
| N(1)-H(1)    | 0.8700     |
| N(2)-C(17)   | 1.350(3)   |
| N(2)-C(12)   | 1.473(3)   |
| N(2)-C(9)    | 1.482(3)   |
| C(1)-C(2)    | 1.397(4)   |
| C(1)-C(6)    | 1.416(4)   |
| C(2)-C(3)    | 1.359(6)   |
| C(2)-H(2)    | 0.9400     |
| C(3)-C(4)    | 1.398(6)   |
| C(3)-H(3)    | 0.9400     |
| C(4)-C(5)    | 1.383(4)   |
| C(4)-H(4)    | 0.9400     |
| C(5)-C(6)    | 1.398(4)   |
| C(5)-H(5)    | 0.9400     |
| C(6)-C(7)    | 1.441(3)   |
| C(7)-C(8)    | 1.356(4)   |
| C(7)-C(9)    | 1.506(3)   |
| C(8)-H(8)    | 0.9400     |
| C(9)-C(10)   | 1.535(3)   |
| C(9)-H(9)    | 0.9900     |
| C(10)-C(11)  | 1.518(3)   |

|              |          |
|--------------|----------|
| C(10)-H(10A) | 0.9800   |
| C(10)-H(10B) | 0.9800   |
| C(11)-C(12)  | 1.542(3) |
| C(11)-H(11)  | 0.9900   |
| C(12)-C(13)  | 1.529(3) |
| C(12)-H(12)  | 0.9900   |
| C(13)-C(14)  | 1.524(4) |
| C(13)-H(13A) | 0.9800   |
| C(13)-H(13B) | 0.9800   |
| C(14)-C(15)  | 1.505(6) |
| C(14)-C(16)  | 1.529(5) |
| C(14)-H(14)  | 0.9900   |
| C(15)-H(15A) | 0.9700   |
| C(15)-H(15B) | 0.9700   |
| C(15)-H(15C) | 0.9700   |
| C(16)-H(16A) | 0.9700   |
| C(16)-H(16B) | 0.9700   |
| C(16)-H(16C) | 0.9700   |
| C(18)-C(19)  | 1.505(5) |
| C(18)-C(21)  | 1.509(4) |
| C(18)-C(20)  | 1.511(5) |
| C(19)-H(19A) | 0.9700   |
| C(19)-H(19B) | 0.9700   |
| C(19)-H(19C) | 0.9700   |
| C(20)-H(20A) | 0.9700   |
| C(20)-H(20B) | 0.9700   |
| C(20)-H(20C) | 0.9700   |
| C(21)-H(21A) | 0.9700   |
| C(21)-H(21B) | 0.9700   |
| C(21)-H(21C) | 0.9700   |
| C(22)-H(22A) | 0.9700   |
| C(22)-H(22B) | 0.9700   |
| C(22)-H(22C) | 0.9700   |
| C(23)-H(23A) | 0.9700   |
| C(23)-H(23B) | 0.9700   |
| C(23)-H(23C) | 0.9700   |

|                   |           |
|-------------------|-----------|
| C(24)-C(25)       | 1.495(17) |
| C(24)-C(26)       | 1.529(17) |
| C(24)-C(27)       | 1.608(14) |
| C(25)-H(25A)      | 0.9700    |
| C(25)-H(25B)      | 0.9700    |
| C(25)-H(25C)      | 0.9700    |
| C(26)-H(26A)      | 0.9700    |
| C(26)-H(26B)      | 0.9700    |
| C(26)-H(26C)      | 0.9700    |
| C(27)-H(27A)      | 0.9700    |
| C(27)-H(27B)      | 0.9700    |
| C(27)-H(27C)      | 0.9700    |
| C(22')-H(22D)     | 0.9700    |
| C(22')-H(22E)     | 0.9700    |
| C(22')-H(22F)     | 0.9700    |
| C(23')-H(23D)     | 0.9700    |
| C(23')-H(23E)     | 0.9700    |
| C(23')-H(23F)     | 0.9700    |
| C(24')-C(27')     | 1.54(2)   |
| C(24')-C(26')     | 1.58(2)   |
| C(24')-C(25')     | 1.59(2)   |
| C(25')-H(25D)     | 0.9700    |
| C(25')-H(25E)     | 0.9700    |
| C(25')-H(25F)     | 0.9700    |
| C(26')-H(26D)     | 0.9700    |
| C(26')-H(26E)     | 0.9700    |
| C(26')-H(26F)     | 0.9700    |
| C(27')-H(27D)     | 0.9700    |
| C(27')-H(27E)     | 0.9700    |
| C(27')-H(27F)     | 0.9700    |
| O(3)-Si(1)-C(22)  | 115.0(4)  |
| O(3)-Si(1)-C(23') | 114.8(5)  |
| O(3)-Si(1)-C(24)  | 106.5(5)  |
| C(22)-Si(1)-C(24) | 120.0(7)  |
| O(3)-Si(1)-C(24') | 106.8(8)  |

|                     |            |
|---------------------|------------|
| C(23')-Si(1)-C(24') | 123.0(9)   |
| O(3)-Si(1)-C(23)    | 105.3(4)   |
| C(22)-Si(1)-C(23)   | 103.9(7)   |
| C(24)-Si(1)-C(23)   | 104.6(5)   |
| O(3)-Si(1)-C(22')   | 104.7(4)   |
| C(23')-Si(1)-C(22') | 104.2(9)   |
| C(24')-Si(1)-C(22') | 100.8(8)   |
| C(17)-O(2)-C(18)    | 120.70(19) |
| C(11)-O(3)-Si(1)    | 126.89(16) |
| C(1)-N(1)-C(8)      | 108.7(2)   |
| C(1)-N(1)-H(1)      | 125.6      |
| C(8)-N(1)-H(1)      | 125.6      |
| C(17)-N(2)-C(12)    | 125.03(18) |
| C(17)-N(2)-C(9)     | 119.32(18) |
| C(12)-N(2)-C(9)     | 114.17(17) |
| N(1)-C(1)-C(2)      | 130.4(3)   |
| N(1)-C(1)-C(6)      | 108.0(2)   |
| C(2)-C(1)-C(6)      | 121.5(3)   |
| C(3)-C(2)-C(1)      | 117.8(4)   |
| C(3)-C(2)-H(2)      | 121.1      |
| C(1)-C(2)-H(2)      | 121.1      |
| C(2)-C(3)-C(4)      | 121.7(3)   |
| C(2)-C(3)-H(3)      | 119.2      |
| C(4)-C(3)-H(3)      | 119.2      |
| C(5)-C(4)-C(3)      | 121.5(4)   |
| C(5)-C(4)-H(4)      | 119.2      |
| C(3)-C(4)-H(4)      | 119.2      |
| C(4)-C(5)-C(6)      | 118.0(3)   |
| C(4)-C(5)-H(5)      | 121.0      |
| C(6)-C(5)-H(5)      | 121.0      |
| C(5)-C(6)-C(1)      | 119.5(2)   |
| C(5)-C(6)-C(7)      | 134.1(3)   |
| C(1)-C(6)-C(7)      | 106.4(3)   |
| C(8)-C(7)-C(6)      | 106.2(2)   |
| C(8)-C(7)-C(9)      | 127.6(2)   |
| C(6)-C(7)-C(9)      | 126.2(2)   |

|                     |            |
|---------------------|------------|
| C(7)-C(8)-N(1)      | 110.6(3)   |
| C(7)-C(8)-H(8)      | 124.7      |
| N(1)-C(8)-H(8)      | 124.7      |
| N(2)-C(9)-C(7)      | 113.82(19) |
| N(2)-C(9)-C(10)     | 101.85(18) |
| C(7)-C(9)-C(10)     | 114.0(2)   |
| N(2)-C(9)-H(9)      | 109.0      |
| C(7)-C(9)-H(9)      | 109.0      |
| C(10)-C(9)-H(9)     | 109.0      |
| C(11)-C(10)-C(9)    | 104.99(19) |
| C(11)-C(10)-H(10A)  | 110.7      |
| C(9)-C(10)-H(10A)   | 110.7      |
| C(11)-C(10)-H(10B)  | 110.7      |
| C(9)-C(10)-H(10B)   | 110.7      |
| H(10A)-C(10)-H(10B) | 108.8      |
| O(3)-C(11)-C(10)    | 111.9(2)   |
| O(3)-C(11)-C(12)    | 112.24(19) |
| C(10)-C(11)-C(12)   | 103.76(18) |
| O(3)-C(11)-H(11)    | 109.6      |
| C(10)-C(11)-H(11)   | 109.6      |
| C(12)-C(11)-H(11)   | 109.6      |
| N(2)-C(12)-C(13)    | 112.9(2)   |
| N(2)-C(12)-C(11)    | 100.86(17) |
| C(13)-C(12)-C(11)   | 114.5(2)   |
| N(2)-C(12)-H(12)    | 109.4      |
| C(13)-C(12)-H(12)   | 109.4      |
| C(11)-C(12)-H(12)   | 109.4      |
| C(14)-C(13)-C(12)   | 114.6(2)   |
| C(14)-C(13)-H(13A)  | 108.6      |
| C(12)-C(13)-H(13A)  | 108.6      |
| C(14)-C(13)-H(13B)  | 108.6      |
| C(12)-C(13)-H(13B)  | 108.6      |
| H(13A)-C(13)-H(13B) | 107.6      |
| C(15)-C(14)-C(13)   | 110.4(4)   |
| C(15)-C(14)-C(16)   | 109.9(3)   |
| C(13)-C(14)-C(16)   | 112.0(3)   |



|                     |            |
|---------------------|------------|
| C(15)-C(14)-H(14)   | 108.1      |
| C(13)-C(14)-H(14)   | 108.1      |
| C(16)-C(14)-H(14)   | 108.1      |
| C(14)-C(15)-H(15A)  | 109.5      |
| C(14)-C(15)-H(15B)  | 109.5      |
| H(15A)-C(15)-H(15B) | 109.5      |
| C(14)-C(15)-H(15C)  | 109.5      |
| H(15A)-C(15)-H(15C) | 109.5      |
| H(15B)-C(15)-H(15C) | 109.5      |
| C(14)-C(16)-H(16A)  | 109.5      |
| C(14)-C(16)-H(16B)  | 109.5      |
| H(16A)-C(16)-H(16B) | 109.5      |
| C(14)-C(16)-H(16C)  | 109.5      |
| H(16A)-C(16)-H(16C) | 109.5      |
| H(16B)-C(16)-H(16C) | 109.5      |
| O(1)-C(17)-O(2)     | 125.5(2)   |
| O(1)-C(17)-N(2)     | 123.2(2)   |
| O(2)-C(17)-N(2)     | 111.25(19) |
| O(2)-C(18)-C(19)    | 110.8(2)   |
| O(2)-C(18)-C(21)    | 102.5(2)   |
| C(19)-C(18)-C(21)   | 110.6(3)   |
| O(2)-C(18)-C(20)    | 108.9(2)   |
| C(19)-C(18)-C(20)   | 112.9(3)   |
| C(21)-C(18)-C(20)   | 110.8(3)   |
| C(18)-C(19)-H(19A)  | 109.5      |
| C(18)-C(19)-H(19B)  | 109.5      |
| H(19A)-C(19)-H(19B) | 109.5      |
| C(18)-C(19)-H(19C)  | 109.5      |
| H(19A)-C(19)-H(19C) | 109.5      |
| H(19B)-C(19)-H(19C) | 109.5      |
| C(18)-C(20)-H(20A)  | 109.5      |
| C(18)-C(20)-H(20B)  | 109.5      |
| H(20A)-C(20)-H(20B) | 109.5      |
| C(18)-C(20)-H(20C)  | 109.5      |
| H(20A)-C(20)-H(20C) | 109.5      |
| H(20B)-C(20)-H(20C) | 109.5      |

|                     |           |
|---------------------|-----------|
| C(18)-C(21)-H(21A)  | 109.5     |
| C(18)-C(21)-H(21B)  | 109.5     |
| H(21A)-C(21)-H(21B) | 109.5     |
| C(18)-C(21)-H(21C)  | 109.5     |
| H(21A)-C(21)-H(21C) | 109.5     |
| H(21B)-C(21)-H(21C) | 109.5     |
| Si(1)-C(22)-H(22A)  | 109.5     |
| Si(1)-C(22)-H(22B)  | 109.5     |
| H(22A)-C(22)-H(22B) | 109.5     |
| Si(1)-C(22)-H(22C)  | 109.5     |
| H(22A)-C(22)-H(22C) | 109.5     |
| H(22B)-C(22)-H(22C) | 109.5     |
| Si(1)-C(23)-H(23A)  | 109.5     |
| Si(1)-C(23)-H(23B)  | 109.5     |
| H(23A)-C(23)-H(23B) | 109.5     |
| Si(1)-C(23)-H(23C)  | 109.5     |
| H(23A)-C(23)-H(23C) | 109.5     |
| H(23B)-C(23)-H(23C) | 109.5     |
| C(25)-C(24)-C(26)   | 106.5(15) |
| C(25)-C(24)-C(27)   | 110.1(12) |
| C(26)-C(24)-C(27)   | 109.1(13) |
| C(25)-C(24)-Si(1)   | 116.0(11) |
| C(26)-C(24)-Si(1)   | 114.5(12) |
| C(27)-C(24)-Si(1)   | 100.3(11) |
| C(24)-C(25)-H(25A)  | 109.5     |
| C(24)-C(25)-H(25B)  | 109.5     |
| H(25A)-C(25)-H(25B) | 109.5     |
| C(24)-C(25)-H(25C)  | 109.5     |
| H(25A)-C(25)-H(25C) | 109.5     |
| H(25B)-C(25)-H(25C) | 109.5     |
| C(24)-C(26)-H(26A)  | 109.5     |
| C(24)-C(26)-H(26B)  | 109.5     |
| H(26A)-C(26)-H(26B) | 109.5     |
| C(24)-C(26)-H(26C)  | 109.5     |
| H(26A)-C(26)-H(26C) | 109.5     |
| H(26B)-C(26)-H(26C) | 109.5     |

|                      |           |
|----------------------|-----------|
| C(24)-C(27)-H(27A)   | 109.5     |
| C(24)-C(27)-H(27B)   | 109.5     |
| H(27A)-C(27)-H(27B)  | 109.5     |
| C(24)-C(27)-H(27C)   | 109.5     |
| H(27A)-C(27)-H(27C)  | 109.5     |
| H(27B)-C(27)-H(27C)  | 109.5     |
| Si(1)-C(22')-H(22D)  | 109.5     |
| Si(1)-C(22')-H(22E)  | 109.5     |
| H(22D)-C(22')-H(22E) | 109.5     |
| Si(1)-C(22')-H(22F)  | 109.5     |
| H(22D)-C(22')-H(22F) | 109.5     |
| H(22E)-C(22')-H(22F) | 109.5     |
| Si(1)-C(23')-H(23D)  | 109.5     |
| Si(1)-C(23')-H(23E)  | 109.5     |
| H(23D)-C(23')-H(23E) | 109.5     |
| Si(1)-C(23')-H(23F)  | 109.5     |
| H(23D)-C(23')-H(23F) | 109.5     |
| H(23E)-C(23')-H(23F) | 109.5     |
| C(27')-C(24')-C(26') | 109(2)    |
| C(27')-C(24')-C(25') | 118(2)    |
| C(26')-C(24')-C(25') | 111(2)    |
| C(27')-C(24')-Si(1)  | 114.9(16) |
| C(26')-C(24')-Si(1)  | 102.8(18) |
| C(25')-C(24')-Si(1)  | 100.7(16) |
| C(24')-C(25')-H(25D) | 109.5     |
| C(24')-C(25')-H(25E) | 109.5     |
| H(25D)-C(25')-H(25E) | 109.5     |
| C(24')-C(25')-H(25F) | 109.5     |
| H(25D)-C(25')-H(25F) | 109.5     |
| H(25E)-C(25')-H(25F) | 109.5     |
| C(24')-C(26')-H(26D) | 109.5     |
| C(24')-C(26')-H(26E) | 109.5     |
| H(26D)-C(26')-H(26E) | 109.5     |
| C(24')-C(26')-H(26F) | 109.5     |
| H(26D)-C(26')-H(26F) | 109.5     |
| H(26E)-C(26')-H(26F) | 109.5     |

|                      |       |
|----------------------|-------|
| C(24')-C(27')-H(27D) | 109.5 |
| C(24')-C(27')-H(27E) | 109.5 |
| H(27D)-C(27')-H(27E) | 109.5 |
| C(24')-C(27')-H(27F) | 109.5 |
| H(27D)-C(27')-H(27F) | 109.5 |
| H(27E)-C(27')-H(27F) | 109.5 |

---

Symmetry transformations used to generate equivalent atoms:

Table 4. Anisotropic displacement parameters ( $\text{\AA}^2 \times 10^3$ ) for mo\_ddz21073\_0m. The anisotropic displacement factor exponent takes the form:  $-2\pi^2 [ h^2 a^{*2} U^{11} + \dots + 2 h k a^* b^* U^{12} ]$

|       | U <sup>11</sup> | U <sup>22</sup> | U <sup>33</sup> | U <sup>23</sup> | U <sup>13</sup> | U <sup>12</sup> |
|-------|-----------------|-----------------|-----------------|-----------------|-----------------|-----------------|
| Si(1) | 86(1)           | 38(1)           | 38(1)           | -1(1)           | 36(1)           | 8(1)            |
| O(1)  | 39(1)           | 43(1)           | 29(1)           | 8(1)            | 13(1)           | 3(1)            |
| O(2)  | 27(1)           | 59(1)           | 34(1)           | 7(1)            | 14(1)           | 0(1)            |
| O(3)  | 54(1)           | 44(1)           | 28(1)           | 4(1)            | 20(1)           | 14(1)           |
| N(1)  | 56(2)           | 42(1)           | 44(1)           | -10(1)          | 12(1)           | -12(1)          |
| N(2)  | 24(1)           | 38(1)           | 26(1)           | 2(1)            | 9(1)            | 2(1)            |
| C(1)  | 34(1)           | 62(2)           | 34(1)           | -4(1)           | 13(1)           | -10(1)          |
| C(2)  | 52(2)           | 91(3)           | 34(2)           | -9(2)           | 9(1)            | -15(2)          |
| C(3)  | 52(2)           | 113(4)          | 33(2)           | 4(2)            | -3(1)           | 2(2)            |
| C(4)  | 58(2)           | 87(3)           | 44(2)           | 21(2)           | 11(2)           | 21(2)           |
| C(5)  | 43(2)           | 56(2)           | 36(1)           | 8(1)            | 13(1)           | 8(1)            |
| C(6)  | 27(1)           | 50(2)           | 28(1)           | 0(1)            | 13(1)           | 0(1)            |
| C(7)  | 25(1)           | 39(1)           | 29(1)           | 0(1)            | 10(1)           | 1(1)            |
| C(8)  | 44(2)           | 41(2)           | 37(1)           | 0(1)            | 10(1)           | -2(1)           |
| C(9)  | 28(1)           | 34(1)           | 29(1)           | 1(1)            | 10(1)           | 5(1)            |
| C(10) | 31(1)           | 49(2)           | 34(1)           | -1(1)           | 17(1)           | 6(1)            |
| C(11) | 39(1)           | 32(1)           | 25(1)           | 1(1)            | 13(1)           | 6(1)            |
| C(12) | 28(1)           | 32(1)           | 25(1)           | 1(1)            | 8(1)            | 0(1)            |
| C(13) | 41(1)           | 31(1)           | 36(1)           | 1(1)            | 16(1)           | 5(1)            |
| C(14) | 63(2)           | 57(2)           | 38(2)           | 10(1)           | 19(1)           | 30(2)           |
| C(15) | 106(4)          | 80(3)           | 99(4)           | 53(3)           | 36(3)           | 40(3)           |
| C(16) | 52(2)           | 85(3)           | 73(2)           | 5(2)            | 4(2)            | 19(2)           |
| C(17) | 30(1)           | 27(1)           | 30(1)           | 1(1)            | 11(1)           | 1(1)            |
| C(18) | 35(1)           | 56(2)           | 39(1)           | 0(1)            | 21(1)           | -2(1)           |
| C(19) | 60(2)           | 69(2)           | 97(3)           | 20(2)           | 49(2)           | -7(2)           |
| C(20) | 56(2)           | 86(3)           | 71(2)           | -28(2)          | 28(2)           | 2(2)            |
| C(21) | 31(1)           | 110(3)          | 61(2)           | 5(2)            | 22(1)           | 6(2)            |
| C(22) | 172(13)         | 96(9)           | 68(6)           | 22(6)           | 63(8)           | 92(8)           |
| C(23) | 129(9)          | 114(8)          | 75(6)           | -22(5)          | 41(6)           | -83(7)          |
| C(24) | 76(3)           | 57(3)           | 43(3)           | -4(3)           | 38(3)           | 1(3)            |
| C(25) | 104(5)          | 42(3)           | 58(3)           | 11(3)           | 41(3)           | 0(3)            |

|        |         |         |       |        |       |        |
|--------|---------|---------|-------|--------|-------|--------|
| C(26)  | 77(4)   | 58(5)   | 42(3) | 2(4)   | 28(3) | 8(5)   |
| C(27)  | 78(5)   | 85(6)   | 73(5) | -12(4) | 26(4) | -19(5) |
| C(22') | 144(11) | 119(10) | 74(7) | 47(7)  | 70(8) | 94(8)  |
| C(23') | 144(12) | 110(10) | 78(8) | -46(7) | 61(8) | -57(8) |
| C(24') | 82(4)   | 57(3)   | 44(4) | 2(3)   | 35(3) | 3(3)   |
| C(25') | 108(6)  | 79(6)   | 59(5) | 17(5)  | 35(5) | 37(5)  |
| C(26') | 83(5)   | 59(7)   | 39(4) | 0(5)   | 43(4) | -1(6)  |
| C(27') | 107(6)  | 59(5)   | 67(5) | 2(4)   | 40(4) | -26(4) |

---

Table 5. Hydrogen coordinates ( $\times 10^4$ ) and isotropic displacement parameters ( $\text{\AA}^2 \times 10^{-3}$ ) for mo\_ddz21073\_0m.

|        | x     | y    | z     | U(eq) |
|--------|-------|------|-------|-------|
| H(1)   | 6316  | 7040 | 10023 | 57    |
| H(2)   | 8123  | 5980 | 11864 | 72    |
| H(3)   | 8847  | 4158 | 12573 | 83    |
| H(4)   | 8006  | 2482 | 11571 | 76    |
| H(5)   | 6355  | 2575 | 9831  | 53    |
| H(8)   | 4680  | 6427 | 8289  | 49    |
| H(9)   | 4591  | 3166 | 8057  | 36    |
| H(10A) | 5002  | 5005 | 6658  | 44    |
| H(10B) | 5431  | 3671 | 6634  | 44    |
| H(11)  | 3240  | 3095 | 5726  | 38    |
| H(12)  | 1423  | 3987 | 6065  | 34    |
| H(13A) | 1678  | 6080 | 6709  | 42    |
| H(13B) | 2792  | 6138 | 6054  | 42    |
| H(14)  | 1011  | 5491 | 4398  | 62    |
| H(15A) | 687   | 7734 | 5235  | 141   |
| H(15B) | 164   | 7372 | 3953  | 141   |
| H(15C) | 1755  | 7422 | 4577  | 141   |
| H(16A) | -589  | 4868 | 5338  | 110   |
| H(16B) | -1261 | 5760 | 4360  | 110   |
| H(16C) | -816  | 6185 | 5625  | 110   |
| H(19A) | -247  | 2365 | 8459  | 105   |
| H(19B) | -743  | 2892 | 9451  | 105   |
| H(19C) | 843   | 2766 | 9587  | 105   |
| H(20A) | 1318  | 4903 | 9952  | 103   |
| H(20B) | -228  | 5067 | 9937  | 103   |
| H(20C) | 379   | 5823 | 9128  | 103   |
| H(21A) | -1372 | 5187 | 7446  | 98    |
| H(21B) | -2102 | 4427 | 8168  | 98    |
| H(21C) | -1645 | 3843 | 7181  | 98    |
| H(22A) | 5476  | 2717 | 4606  | 159   |

|        |      |      |      |     |
|--------|------|------|------|-----|
| H(22B) | 4862 | 2289 | 3349 | 159 |
| H(22C) | 4127 | 1950 | 4264 | 159 |
| H(23A) | 1338 | 2914 | 3211 | 155 |
| H(23B) | 1969 | 2720 | 2203 | 155 |
| H(23C) | 1305 | 3937 | 2347 | 155 |
| H(25A) | 2343 | 5877 | 2135 | 96  |
| H(25B) | 3659 | 6682 | 2390 | 96  |
| H(25C) | 3061 | 6304 | 3378 | 96  |
| H(26A) | 3385 | 4216 | 1325 | 85  |
| H(26B) | 4991 | 4089 | 1840 | 85  |
| H(26C) | 4353 | 5293 | 1314 | 85  |
| H(27A) | 6020 | 5904 | 3324 | 117 |
| H(27B) | 6174 | 4621 | 3819 | 117 |
| H(27C) | 5534 | 5617 | 4393 | 117 |
| H(22D) | 6135 | 3740 | 4741 | 157 |
| H(22E) | 5844 | 2885 | 3699 | 157 |
| H(22F) | 5478 | 2498 | 4799 | 157 |
| H(23D) | 2516 | 2102 | 3754 | 157 |
| H(23E) | 2944 | 2183 | 2631 | 157 |
| H(23F) | 1649 | 2878 | 2742 | 157 |
| H(25D) | 2387 | 6058 | 3071 | 120 |
| H(25E) | 1824 | 5103 | 2129 | 120 |
| H(25F) | 2534 | 6246 | 1851 | 120 |
| H(26D) | 4217 | 4882 | 1170 | 83  |
| H(26E) | 3529 | 3759 | 1515 | 83  |
| H(26F) | 5126 | 3965 | 2018 | 83  |
| H(27D) | 6077 | 5329 | 3402 | 112 |
| H(27E) | 5239 | 6014 | 4091 | 112 |
| H(27F) | 5253 | 6470 | 2893 | 112 |

---



Table 6. Torsion angles [ ° ] for mo\_ddz21073\_0m.

---

|                         |           |
|-------------------------|-----------|
| C(22)-Si(1)-O(3)-C(11)  | -21.2(7)  |
| C(23')-Si(1)-O(3)-C(11) | 58.8(8)   |
| C(24)-Si(1)-O(3)-C(11)  | -156.7(5) |
| C(24')-Si(1)-O(3)-C(11) | -161.1(7) |
| C(23)-Si(1)-O(3)-C(11)  | 92.6(4)   |
| C(22')-Si(1)-O(3)-C(11) | -54.8(5)  |
| C(8)-N(1)-C(1)-C(2)     | -178.0(3) |
| C(8)-N(1)-C(1)-C(6)     | -0.4(3)   |
| N(1)-C(1)-C(2)-C(3)     | 177.8(3)  |
| C(6)-C(1)-C(2)-C(3)     | 0.4(5)    |
| C(1)-C(2)-C(3)-C(4)     | 0.4(5)    |
| C(2)-C(3)-C(4)-C(5)     | -0.9(6)   |
| C(3)-C(4)-C(5)-C(6)     | 0.5(5)    |
| C(4)-C(5)-C(6)-C(1)     | 0.3(4)    |
| C(4)-C(5)-C(6)-C(7)     | -178.1(3) |
| N(1)-C(1)-C(6)-C(5)     | -178.6(2) |
| C(2)-C(1)-C(6)-C(5)     | -0.7(4)   |
| N(1)-C(1)-C(6)-C(7)     | 0.1(3)    |
| C(2)-C(1)-C(6)-C(7)     | 178.0(3)  |
| C(5)-C(6)-C(7)-C(8)     | 178.7(3)  |
| C(1)-C(6)-C(7)-C(8)     | 0.2(3)    |
| C(5)-C(6)-C(7)-C(9)     | -3.5(4)   |
| C(1)-C(6)-C(7)-C(9)     | 178.0(2)  |
| C(6)-C(7)-C(8)-N(1)     | -0.4(3)   |
| C(9)-C(7)-C(8)-N(1)     | -178.2(2) |
| C(1)-N(1)-C(8)-C(7)     | 0.5(3)    |
| C(17)-N(2)-C(9)-C(7)    | -66.3(3)  |
| C(12)-N(2)-C(9)-C(7)    | 126.9(2)  |
| C(17)-N(2)-C(9)-C(10)   | 170.6(2)  |
| C(12)-N(2)-C(9)-C(10)   | 3.8(3)    |
| C(8)-C(7)-C(9)-N(2)     | -54.8(3)  |
| C(6)-C(7)-C(9)-N(2)     | 127.9(2)  |
| C(8)-C(7)-C(9)-C(10)    | 61.5(3)   |
| C(6)-C(7)-C(9)-C(10)    | -115.9(3) |

|                          |             |
|--------------------------|-------------|
| N(2)-C(9)-C(10)-C(11)    | -25.7(3)    |
| C(7)-C(9)-C(10)-C(11)    | -148.7(2)   |
| Si(1)-O(3)-C(11)-C(10)   | 98.2(3)     |
| Si(1)-O(3)-C(11)-C(12)   | -145.65(19) |
| C(9)-C(10)-C(11)-O(3)    | 159.3(2)    |
| C(9)-C(10)-C(11)-C(12)   | 38.1(3)     |
| C(17)-N(2)-C(12)-C(13)   | 90.3(3)     |
| C(9)-N(2)-C(12)-C(13)    | -103.8(2)   |
| C(17)-N(2)-C(12)-C(11)   | -147.0(2)   |
| C(9)-N(2)-C(12)-C(11)    | 18.9(3)     |
| O(3)-C(11)-C(12)-N(2)    | -155.1(2)   |
| C(10)-C(11)-C(12)-N(2)   | -34.1(2)    |
| O(3)-C(11)-C(12)-C(13)   | -33.5(3)    |
| C(10)-C(11)-C(12)-C(13)  | 87.5(2)     |
| N(2)-C(12)-C(13)-C(14)   | -157.1(2)   |
| C(11)-C(12)-C(13)-C(14)  | 88.2(3)     |
| C(12)-C(13)-C(14)-C(15)  | -164.0(3)   |
| C(12)-C(13)-C(14)-C(16)  | 73.2(3)     |
| C(18)-O(2)-C(17)-O(1)    | 8.9(4)      |
| C(18)-O(2)-C(17)-N(2)    | -170.8(2)   |
| C(12)-N(2)-C(17)-O(1)    | 166.8(2)    |
| C(9)-N(2)-C(17)-O(1)     | 1.5(4)      |
| C(12)-N(2)-C(17)-O(2)    | -13.5(3)    |
| C(9)-N(2)-C(17)-O(2)     | -178.8(2)   |
| C(17)-O(2)-C(18)-C(19)   | -60.9(3)    |
| C(17)-O(2)-C(18)-C(21)   | -178.9(3)   |
| C(17)-O(2)-C(18)-C(20)   | 63.8(3)     |
| O(3)-Si(1)-C(24)-C(25)   | -45.9(10)   |
| C(22)-Si(1)-C(24)-C(25)  | -178.7(9)   |
| C(23')-Si(1)-C(24)-C(25) | 93.4(13)    |
| C(24')-Si(1)-C(24)-C(25) | 49(16)      |
| C(23)-Si(1)-C(24)-C(25)  | 65.4(11)    |
| C(22')-Si(1)-C(24)-C(25) | -153.5(10)  |
| O(3)-Si(1)-C(24)-C(26)   | -170.6(11)  |
| C(22)-Si(1)-C(24)-C(26)  | 56.6(15)    |
| C(23')-Si(1)-C(24)-C(26) | -31.4(17)   |

|                            |            |
|----------------------------|------------|
| C(24')-Si(1)-C(24)-C(26)   | -75(16)    |
| C(23)-Si(1)-C(24)-C(26)    | -59.4(13)  |
| C(22')-Si(1)-C(24)-C(26)   | 81.8(13)   |
| O(3)-Si(1)-C(24)-C(27)     | 72.7(8)    |
| C(22)-Si(1)-C(24)-C(27)    | -60.1(11)  |
| C(23')-Si(1)-C(24)-C(27)   | -148.0(10) |
| C(24')-Si(1)-C(24)-C(27)   | 168(17)    |
| C(23)-Si(1)-C(24)-C(27)    | -176.1(8)  |
| C(22')-Si(1)-C(24)-C(27)   | -34.9(9)   |
| O(3)-Si(1)-C(24')-C(27')   | 63.1(15)   |
| C(22)-Si(1)-C(24')-C(27')  | -72.9(18)  |
| C(23')-Si(1)-C(24')-C(27') | -160.9(13) |
| C(24)-Si(1)-C(24')-C(27')  | -23(15)    |
| C(23)-Si(1)-C(24')-C(27')  | 172.8(14)  |
| C(22')-Si(1)-C(24')-C(27') | -46.0(16)  |
| O(3)-Si(1)-C(24')-C(26')   | -178.8(15) |
| C(22)-Si(1)-C(24')-C(26')  | 45.2(19)   |
| C(23')-Si(1)-C(24')-C(26') | -43(2)     |
| C(24)-Si(1)-C(24')-C(26')  | 95(17)     |
| C(23)-Si(1)-C(24')-C(26')  | -69.1(17)  |
| C(22')-Si(1)-C(24')-C(26') | 72.1(17)   |
| O(3)-Si(1)-C(24')-C(25')   | -64.2(12)  |
| C(22)-Si(1)-C(24')-C(25')  | 159.7(10)  |
| C(23')-Si(1)-C(24')-C(25') | 71.8(16)   |
| C(24)-Si(1)-C(24')-C(25')  | -150(17)   |
| C(23)-Si(1)-C(24')-C(25')  | 45.5(13)   |
| C(22')-Si(1)-C(24')-C(25') | -173.4(11) |

---

Symmetry transformations used to generate equivalent atoms:

Table 7. Hydrogen bonds for mo\_ddz21073\_0m [ $\text{\AA}$  and  $^\circ$ ].

| D-H...A             | d(D-H) | d(H...A) | d(D...A) | $\angle(\text{DHA})$ |
|---------------------|--------|----------|----------|----------------------|
| N(1)-H(1)...O(1)#1  | 0.87   | 2.07     | 2.920(3) | 163.6                |
| C(19)-H(19C)...O(1) | 0.97   | 2.35     | 2.931(4) | 117.9                |
| C(20)-H(20A)...O(1) | 0.97   | 2.49     | 3.075(4) | 118.4                |

Symmetry transformations used to generate equivalent atoms:

#1  $-x+1, y+1/2, -z+2$
